# Supplementary material
Source: PubMed Central journal article supplement (PMC8300002)
Supplement: NIHMS1722010-supplement-SI.pdf [file NIHMS1722010-supplement-SI.pdf]

**Polyazamacrocyclic ligands facilitate  $^{89}\text{Zr}$  radiochemistry and yield  $^{89}\text{Zr}$  complexes with remarkable stability.**

Darpan N. Pandya<sup>a\*</sup>, Kelly E. Henry<sup>b</sup>, Cynthia S. Day<sup>c</sup>, Stephen A. Graves<sup>a</sup>, Veronica L. Nagle<sup>b</sup>, Thomas R. Dilling<sup>b</sup>, Akesh Sinha<sup>a</sup>, Brandie M. Ehrmann<sup>d</sup>, Nikunj B. Bhatt<sup>e</sup>, Yusuf Menda<sup>a</sup>, Jason S. Lewis<sup>b\*</sup> and Thaddeus J. Wadas<sup>a\*</sup>

- a) Department of Radiology University of Iowa, Iowa City, IA 52242
- b) Department of Radiology, Memorial Sloan Kettering Cancer Center, New York, NY 10065
- c) Department of Chemistry, Wake Forest University, Winston-Salem, NC 27109.
- d) Department of Chemistry, University of North Carolina at Chapel Hill, Chapel Hill, NC 27599.
- e) Department of Radiology, Columbia University, New York, NY 10032.

\*The corresponding authors for this manuscript are listed below.

Thaddeus J. Wadas, Ph.D.  
Associate Professor of Radiology  
Director, Small Animal Imaging Core  
Carver College of Medicine  
University of Iowa  
169 Newton Road  
Iowa City, IA 52242  
phone: (319) 335-5009  
fax: (319) 353-6275  
e-mail: [thaddeus-wadas@uiowa.edu](mailto:thaddeus-wadas@uiowa.edu)

Darpan N. Pandya, Ph.D.  
Associate Research Scientist  
Department of Radiology  
Carver College of Medicine  
University of Iowa  
169 Newton Road  
Iowa City, IA 52242  
phone: (319) 335-5161  
e-mail: [darpan-pandya@uiowa.edu](mailto:darpan-pandya@uiowa.edu)

Jason S. Lewis, Ph.D.  
Emily Tow Jackson Chair in Oncology  
Department of Radiology,  
Memorial Sloan Kettering Cancer Center,  
New York, NY 10065  
Phone: 646-888-3038  
Email: [lewisj2@mskcc.org](mailto:lewisj2@mskcc.org)

## Table of Contents

| Section                                                                                                                                                                                                                                    | Page Number |
|--------------------------------------------------------------------------------------------------------------------------------------------------------------------------------------------------------------------------------------------|-------------|
| Scheme 1. Synthesis of <sup>Nat</sup> Zr-TETA                                                                                                                                                                                              | 3           |
| Scheme 2. Synthesis of <sup>Nat</sup> Zr-TRITA                                                                                                                                                                                             | 4           |
| HPLC, NMR, HRMS analysis of <sup>Nat</sup> Zr-TRITA (Figs. S1-S7)                                                                                                                                                                          | 5-11        |
| Scheme 3. Synthesis of <sup>Nat</sup> Zr-PCTA                                                                                                                                                                                              | 12          |
| HPLC, NMR, HRMS analysis of <sup>Nat</sup> Zr-PCTA (Figs. S8-S14)                                                                                                                                                                          | 13-19       |
| Scheme 4. Synthesis of <sup>Nat</sup> Zr-NOTA-AcAc                                                                                                                                                                                         | 20          |
| HPLC, NMR, HRMS analysis of <sup>Nat</sup> Zr-NOTA-AcAc (Figs. S15-S23)                                                                                                                                                                    | 21-29       |
| Crystal Structure analysis of <sup>Nat</sup> Zr-TRITA (Figs. S24-S30)                                                                                                                                                                      | 30-38       |
| Crystal structure data collection parameters <sup>Nat</sup> Zr-TRITA (Tables S1-S5)                                                                                                                                                        | 39-69       |
| Crystal Structure analysis of <sup>Nat</sup> Zr-PCTA (Figs. S31-S34)                                                                                                                                                                       | 70-75       |
| Crystal structure data collection parameters of <sup>Nat</sup> Zr-PCTA (Tables S6-S10)                                                                                                                                                     | 76-87       |
| Crystal Structure analysis of <sup>Nat</sup> Zr-NOTA (Figs. S35-S41)                                                                                                                                                                       | 88-96       |
| Crystal structure data collection parameters <sup>Nat</sup> Zr-NOTA (Tables S11-S15)                                                                                                                                                       | 97-109      |
| Scheme S5. Radiochemical Synthesis of [ <sup>89</sup> Zr]Zr-PCTA, [ <sup>89</sup> Zr]Zr-NOTA, [ <sup>89</sup> Zr]Zr-TRITA and [ <sup>89</sup> Zr]Zr-TETA using [ <sup>89</sup> Zr]Zr(ox) <sub>2</sub>                                      | 110         |
| Summary of optimized radiochemistry conditions to prepare for [ <sup>89</sup> Zr]Zr-PCTA, [ <sup>89</sup> Zr]Zr-NOTA, [ <sup>89</sup> Zr]Zr-TRITA and [ <sup>89</sup> Zr]Zr-TETA using [ <sup>89</sup> Zr]Zr(ox) <sub>2</sub> (Table S16)  | 111         |
| Preparation of [ <sup>89</sup> Zr]ZrCl <sub>4</sub> from [ <sup>89</sup> Zr]Zr(ox) <sub>2</sub> (Fig. S42)                                                                                                                                 | 112         |
| Scheme S6. Radiochemical Synthesis of [ <sup>89</sup> Zr]Zr-PCTA, [ <sup>89</sup> Zr]Zr-NOTA, [ <sup>89</sup> Zr]Zr-TRITA and [ <sup>89</sup> Zr]Zr-TETA using [ <sup>89</sup> Zr]ZrCl <sub>4</sub>                                        | 113         |
| Radiochemistry protocol using [ <sup>89</sup> Zr]ZrCl <sub>4</sub> for [ <sup>89</sup> Zr]Zr-PCTA (Table S17, Fig. S43)                                                                                                                    | 114-115     |
| Quality control of [ <sup>89</sup> Zr]Zr-PCTA by radio-TLC (Fig. S44)                                                                                                                                                                      | 116         |
| Quality control of [ <sup>89</sup> Zr]Zr-PCTA by radio-HPLC (Fig. S45)                                                                                                                                                                     | 117         |
| Radiochemistry protocol using [ <sup>89</sup> Zr]ZrCl <sub>4</sub> for [ <sup>89</sup> Zr]Zr-NOTA (Table S18, Fig. S46)                                                                                                                    | 118-119     |
| Quality control of [ <sup>89</sup> Zr]Zr-NOTA by radio-TLC (Fig. S47)                                                                                                                                                                      | 120         |
| Quality control of [ <sup>89</sup> Zr]Zr-NOTA by radio-HPLC (Fig. S48)                                                                                                                                                                     | 121         |
| Radiochemistry protocol using [ <sup>89</sup> Zr]ZrCl <sub>4</sub> for [ <sup>89</sup> Zr]Zr-TRITA (Tables S19, S20; Figs. S49, S50)                                                                                                       | 122-125     |
| Quality control of [ <sup>89</sup> Zr]Zr-TRITA by radio-TLC (Fig. S51)                                                                                                                                                                     | 126         |
| Quality control of [ <sup>89</sup> Zr]Zr-TRITA by radio-HPLC (Fig. S52)                                                                                                                                                                    | 127         |
| Radiochemistry protocol using [ <sup>89</sup> Zr]ZrCl <sub>4</sub> for [ <sup>89</sup> Zr]Zr-TETA (Table S21, Fig. S53)                                                                                                                    | 128-129     |
| Determination of partition coefficients (LogP) (Table S22)                                                                                                                                                                                 | 130         |
| <i>In vitro</i> serum stability study by SE-HPLC (Figs. S54, S55)                                                                                                                                                                          | 131-132     |
| Complete Biodistribution studies of [ <sup>89</sup> Zr]Zr-PCTA (Table S23), [ <sup>89</sup> Zr]Zr-NOTA (Table S24), and [ <sup>89</sup> Zr]Zr-TRITA (Table S25)                                                                            | 133-135     |
| Summary of comparative biodistribution data of [ <sup>89</sup> Zr]Zr-complexes (Figs. S56-S58)                                                                                                                                             | 136-138     |
| Dynamic PET data of [ <sup>89</sup> Zr]Zr-PCTA and [ <sup>89</sup> Zr]Zr-NOTA in specific tissues (Fig. S59)                                                                                                                               | 139         |
| Tables comparing <i>in vitro</i> and <i>in vivo</i> properties of [ <sup>89</sup> Zr]Zr-PCTA, [ <sup>89</sup> Zr]Zr-NOTA, and [ <sup>89</sup> Zr]Zr-TRITA with [ <sup>89</sup> Zr]Zr-Complexes reported in the literature (Tables S26-S28) | 140-142     |
| References                                                                                                                                                                                                                                 | 143-144     |

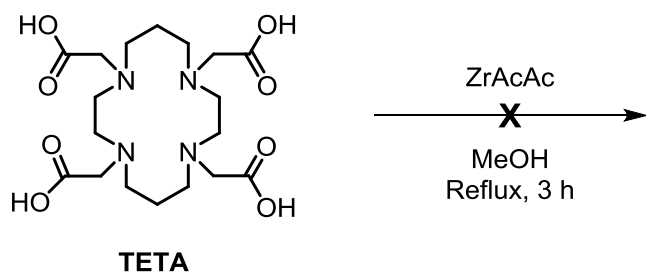

**Scheme S1. Synthesis of zirconium complex of TETA**

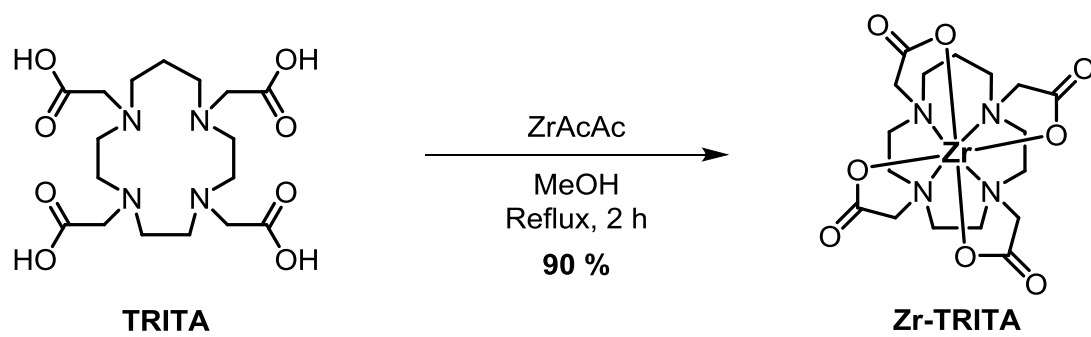

**Scheme S2. Synthesis of zirconium complex of TRITA**

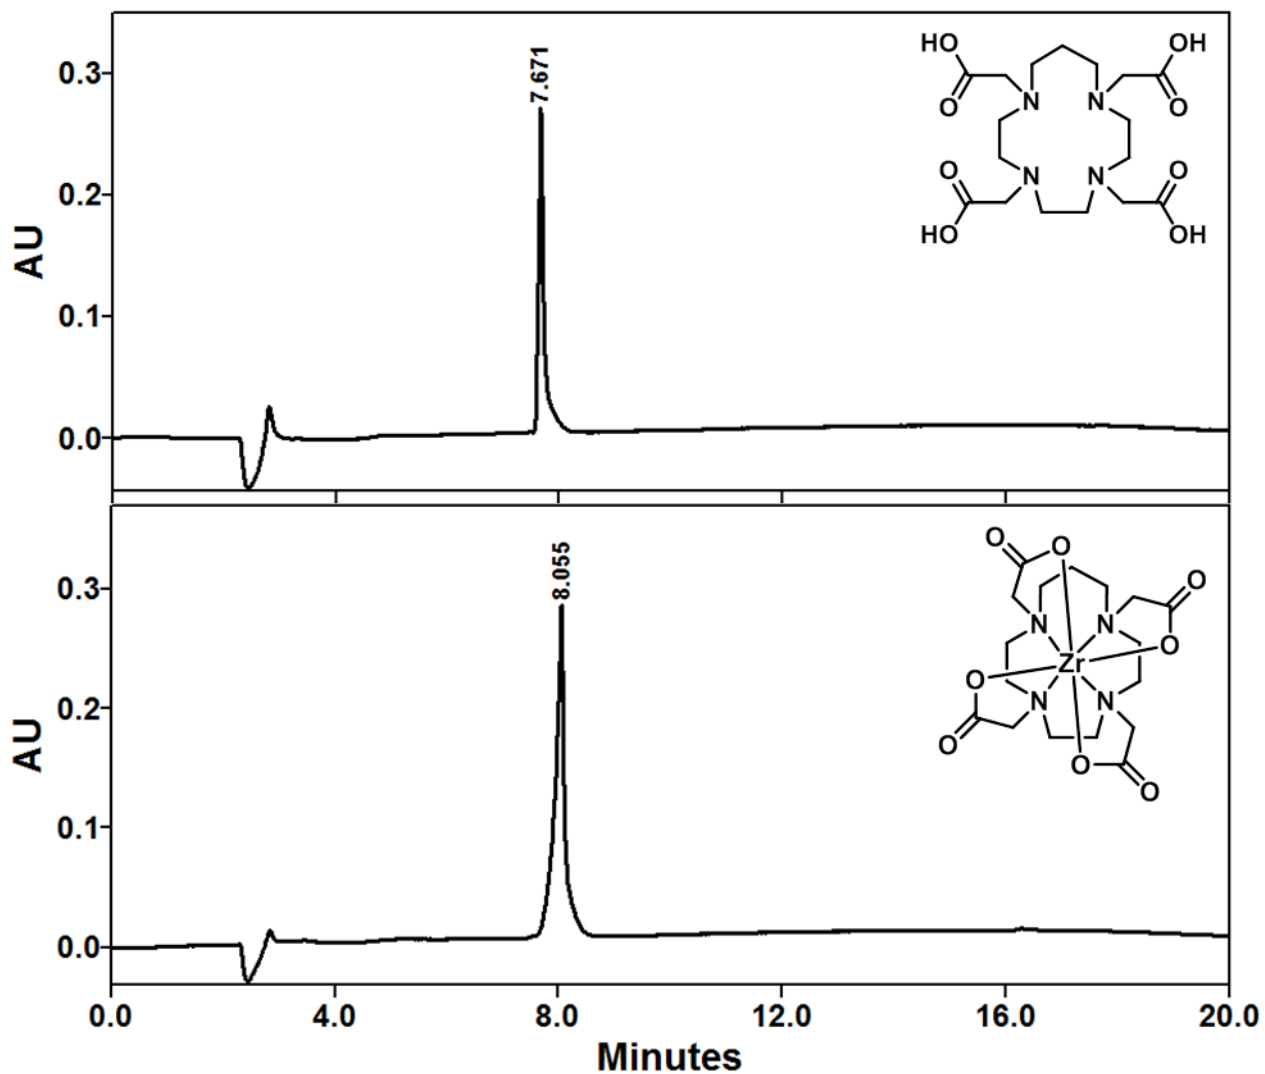

Figure S1. UV-HPLC chromatogram (201nm) of TRITA ligand (top) and nonradioactive  $^{nat}\text{Zr}$ -TRITA complex (bottom)

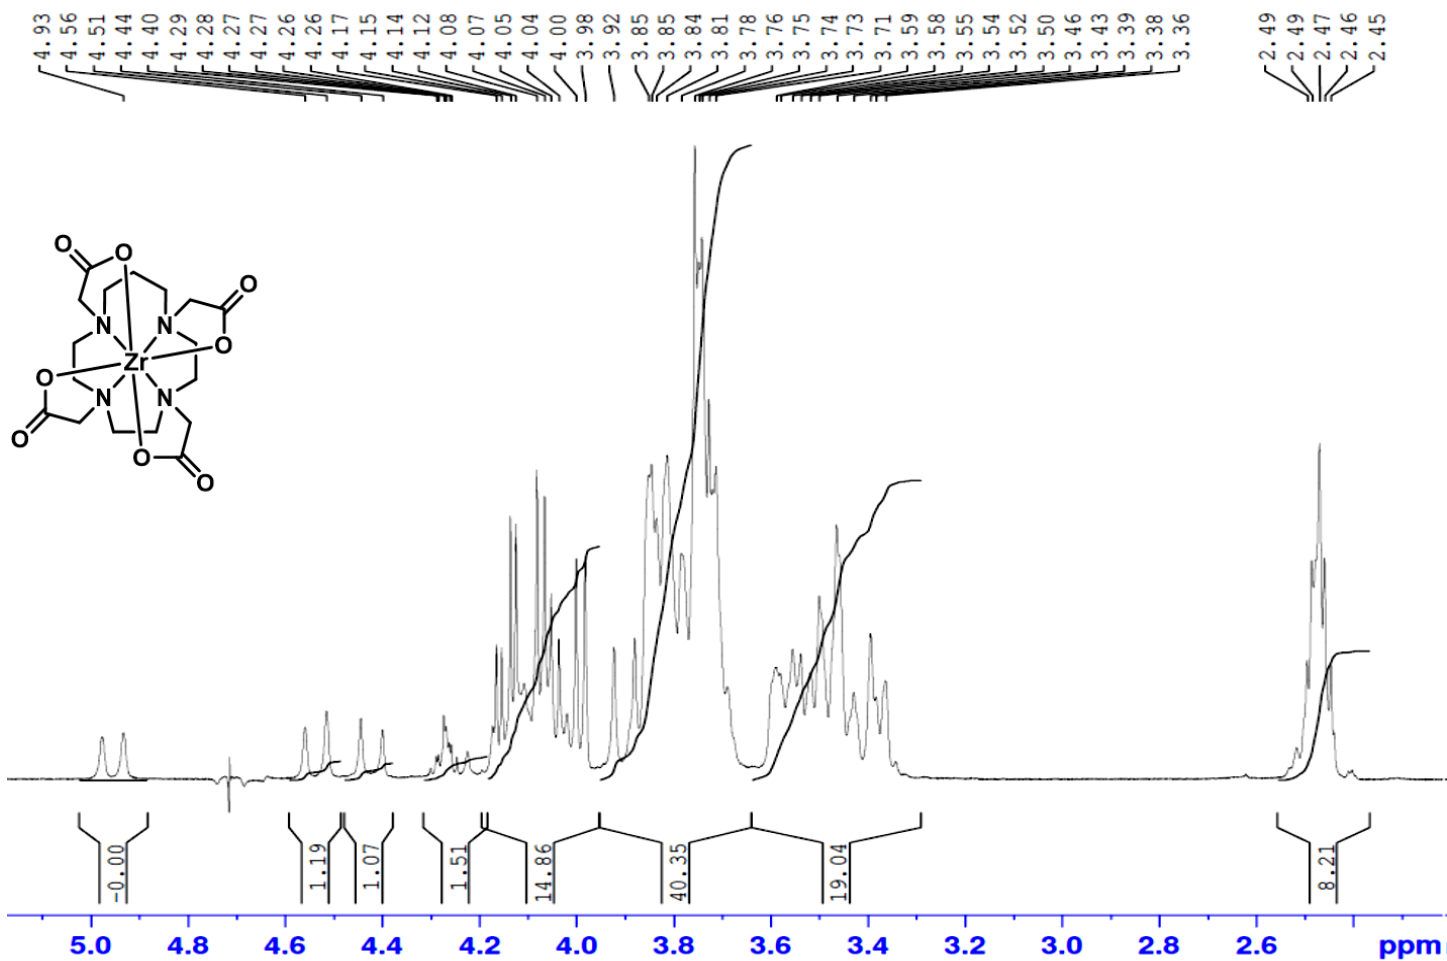

Figure S2. <sup>1</sup>H-NMR spectrum (D<sub>2</sub>O-400 MHz) of the Zr-TRITA complex



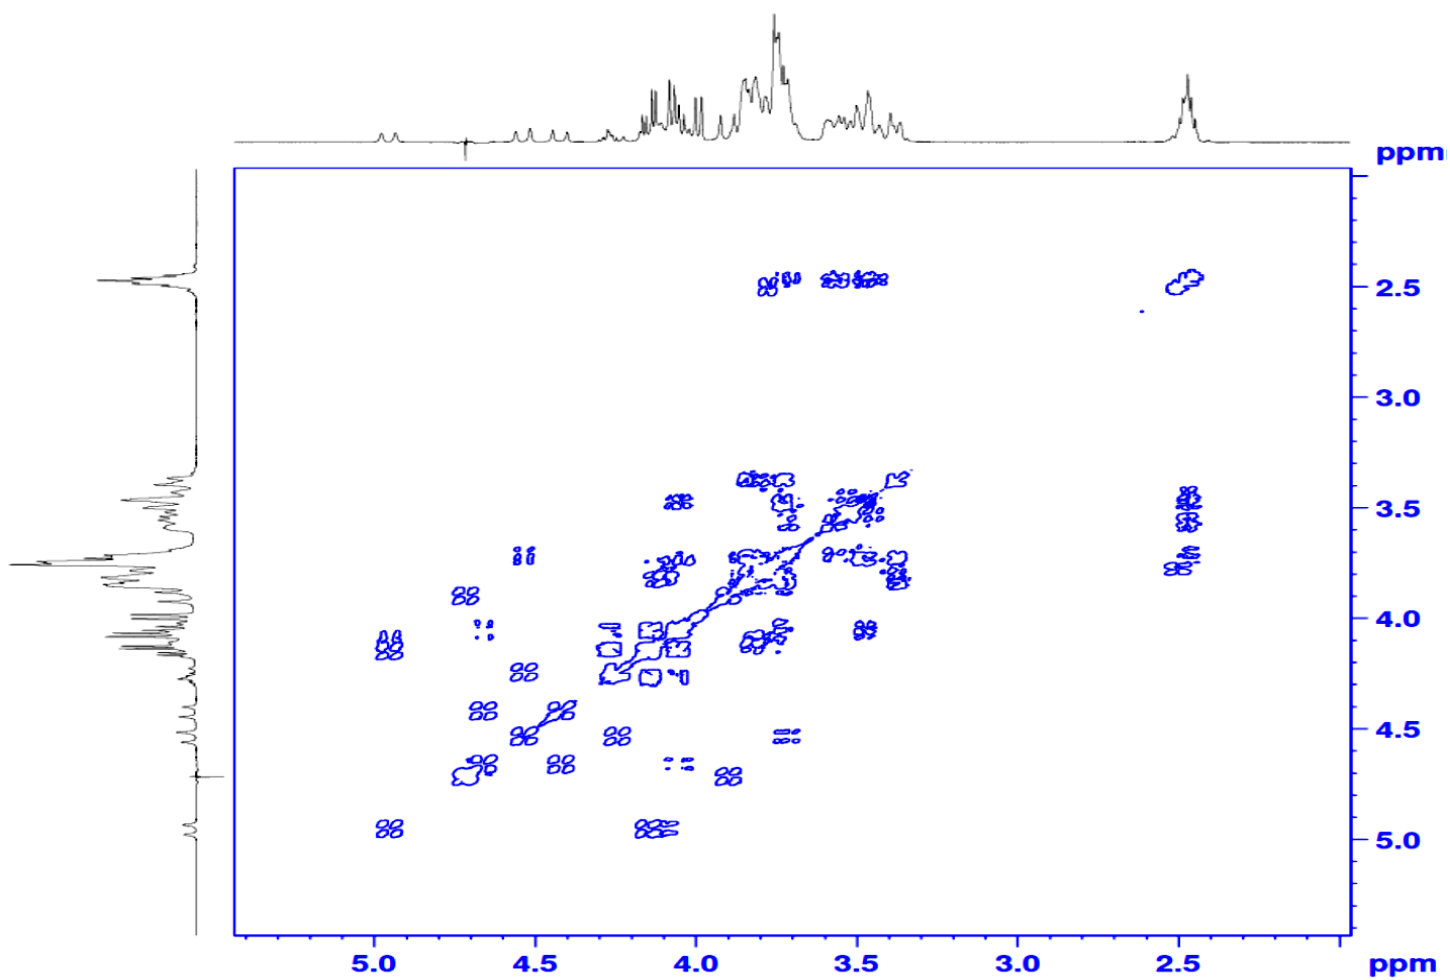

Figure S4. 2-D COSY NMR spectrum ( $D_2O$ -400 MHz) of the Zr-TRITA complex



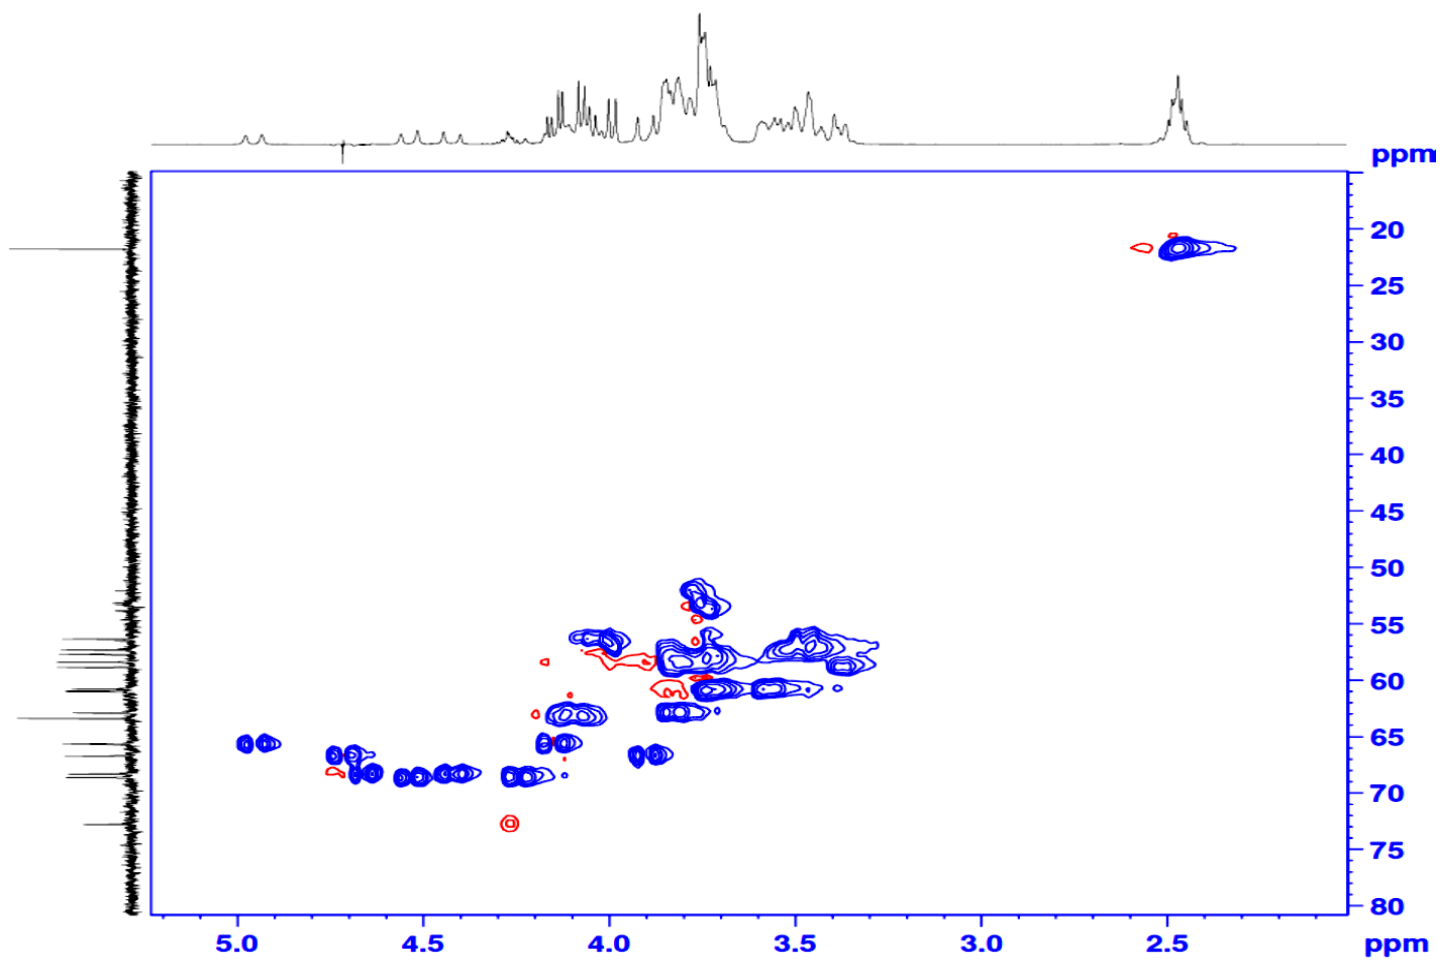

Figure S5. 2-D HSQC NMR spectrum ( $\text{D}_2\text{O}$ -400 MHz) of the Zr-TRITA complex

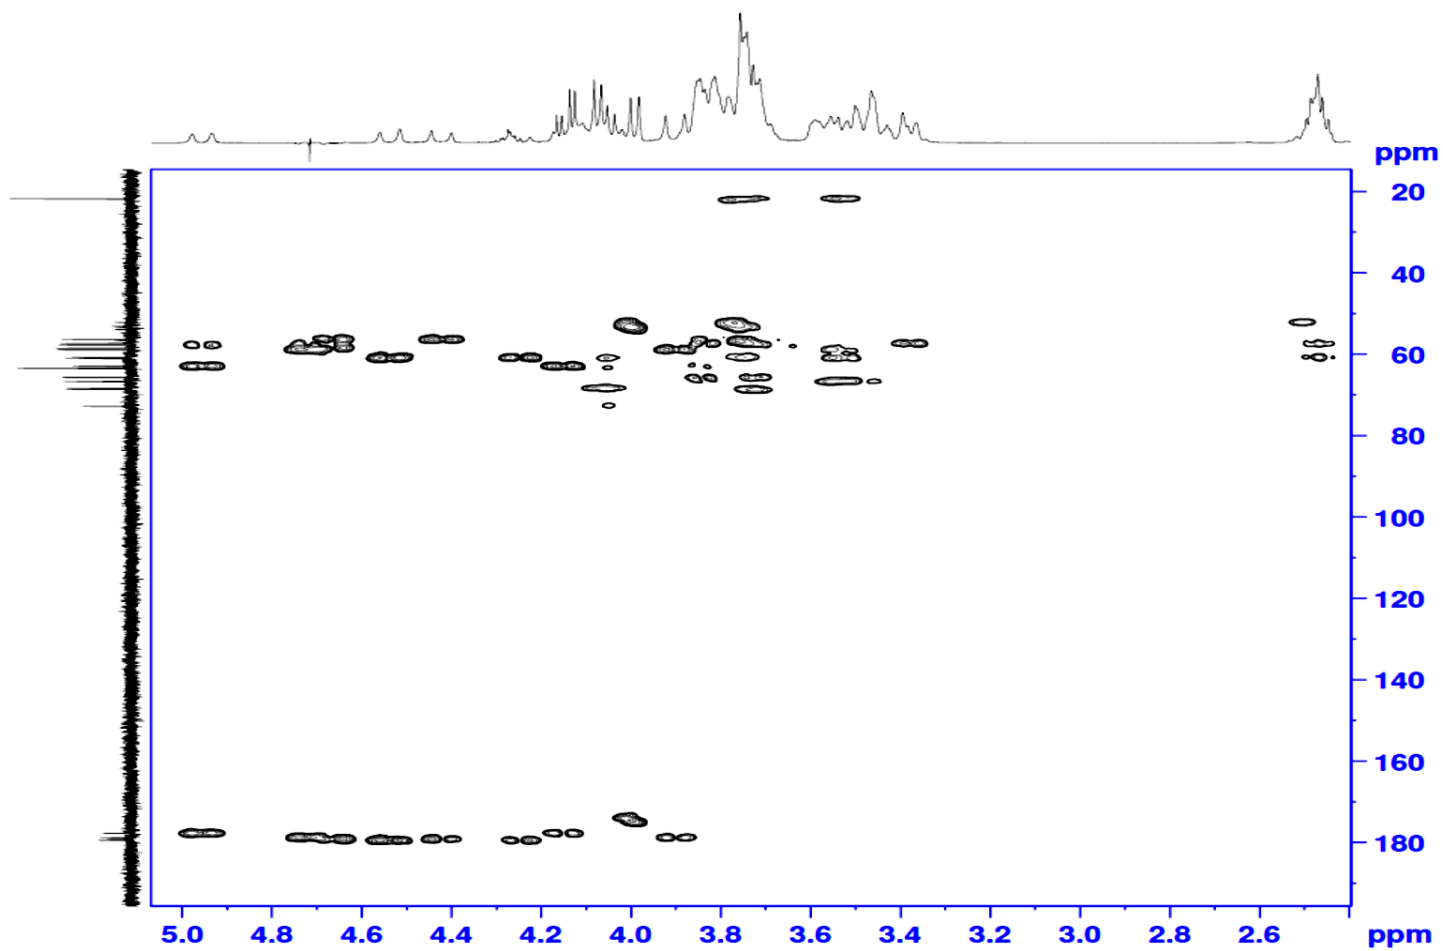

Figure S6. 2-D HMBC NMR spectrum ( $\text{D}_2\text{O}$ -400 MHz) of the Zr-TRITA complex

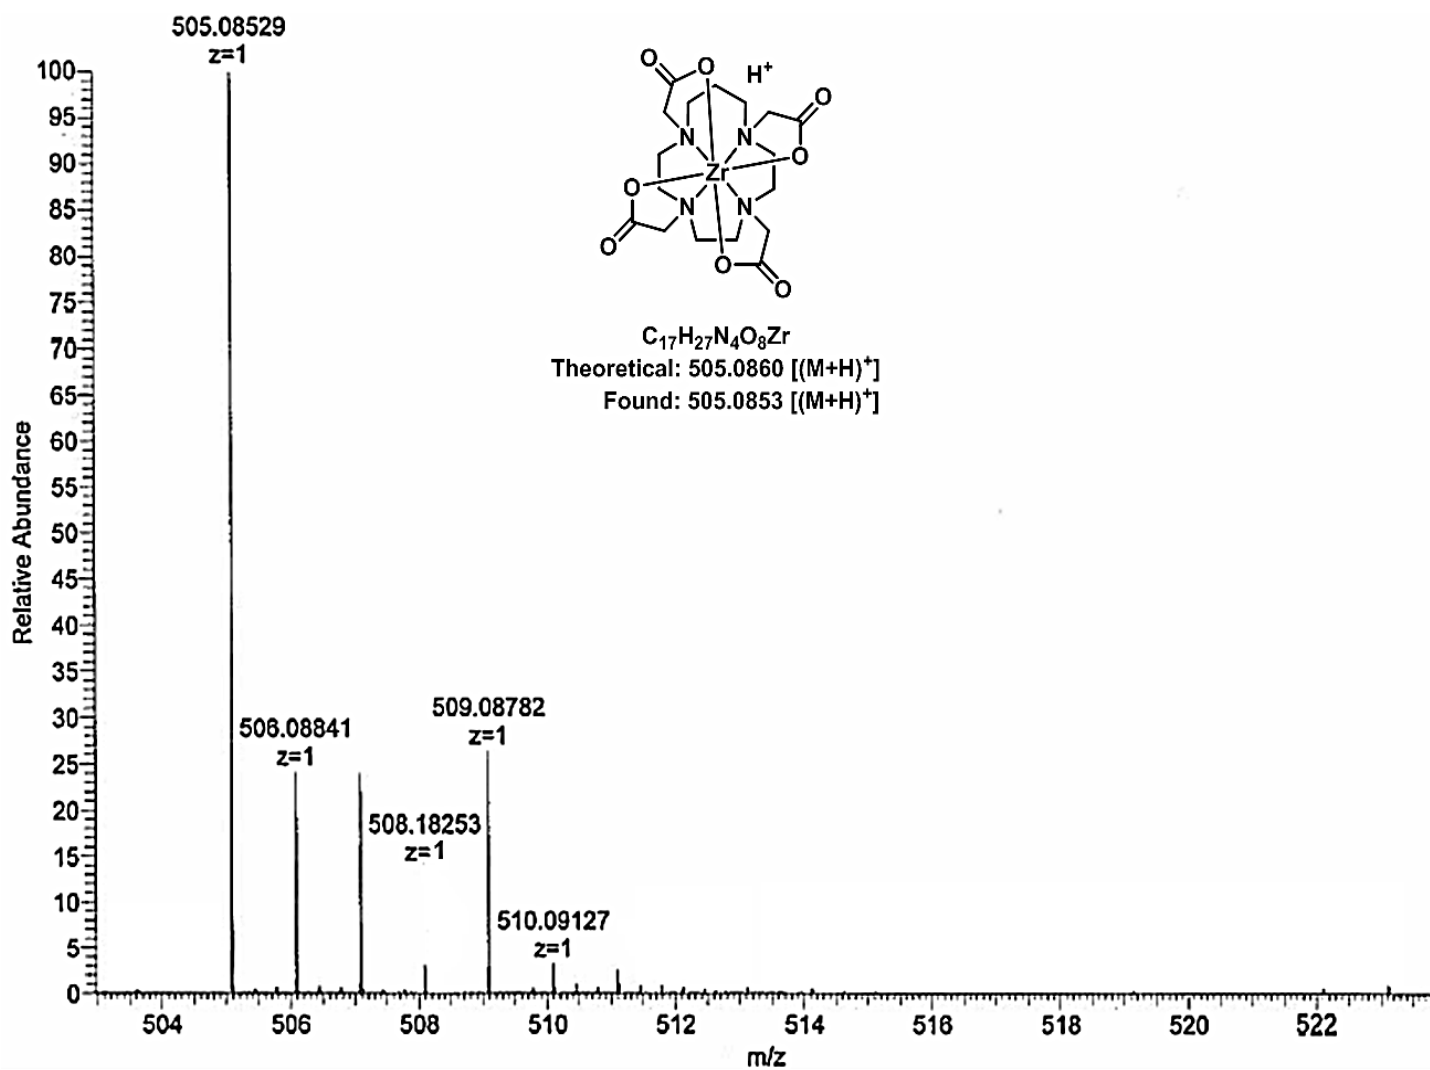

Figure S7. HR ESI FT-ICR MS (Positive mode) analysis of the Zr-TRITA complex

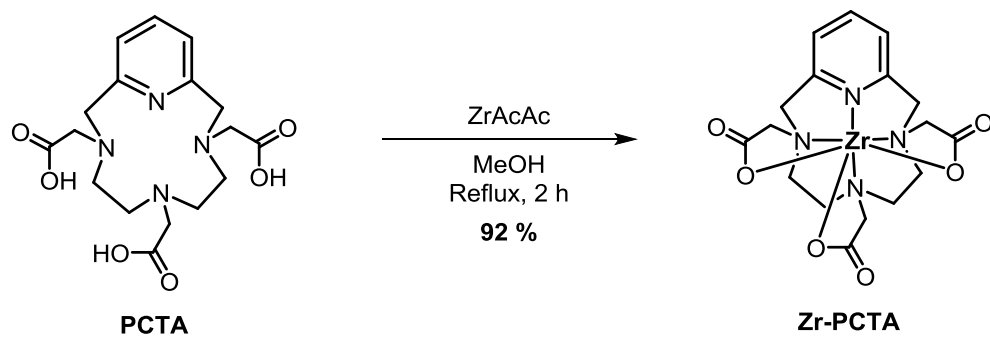

**Scheme S3. Synthesis of zirconium complex of PCTA**

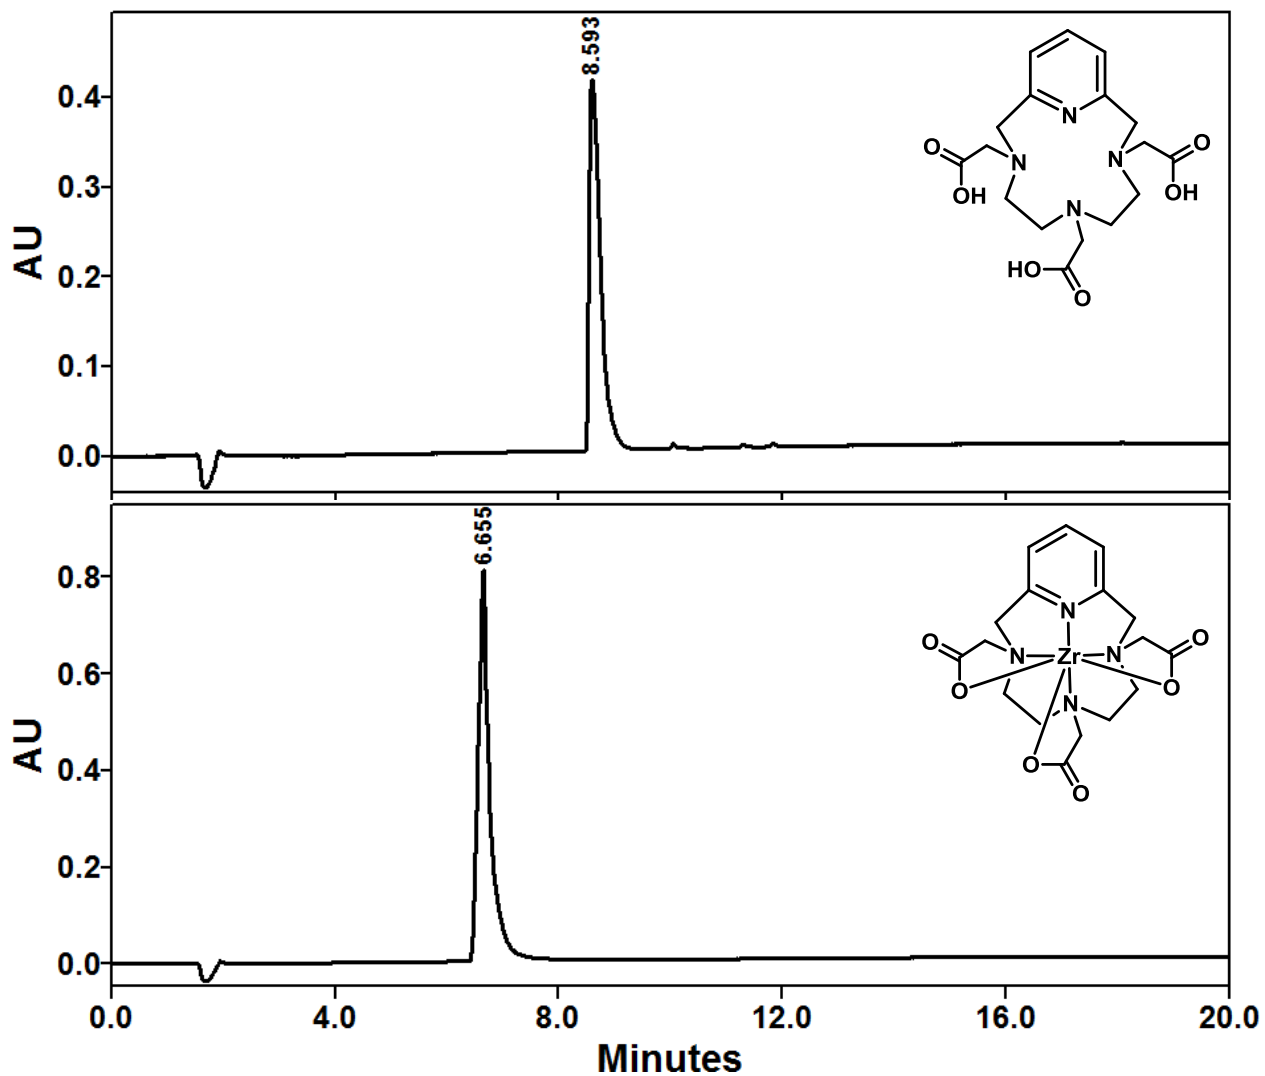

Figure S8. UV-HPLC chromatogram (201nm) of PCTA ligand (top) and nonradioactive <sup>Nat</sup>Zr-PCTA complex (bottom)

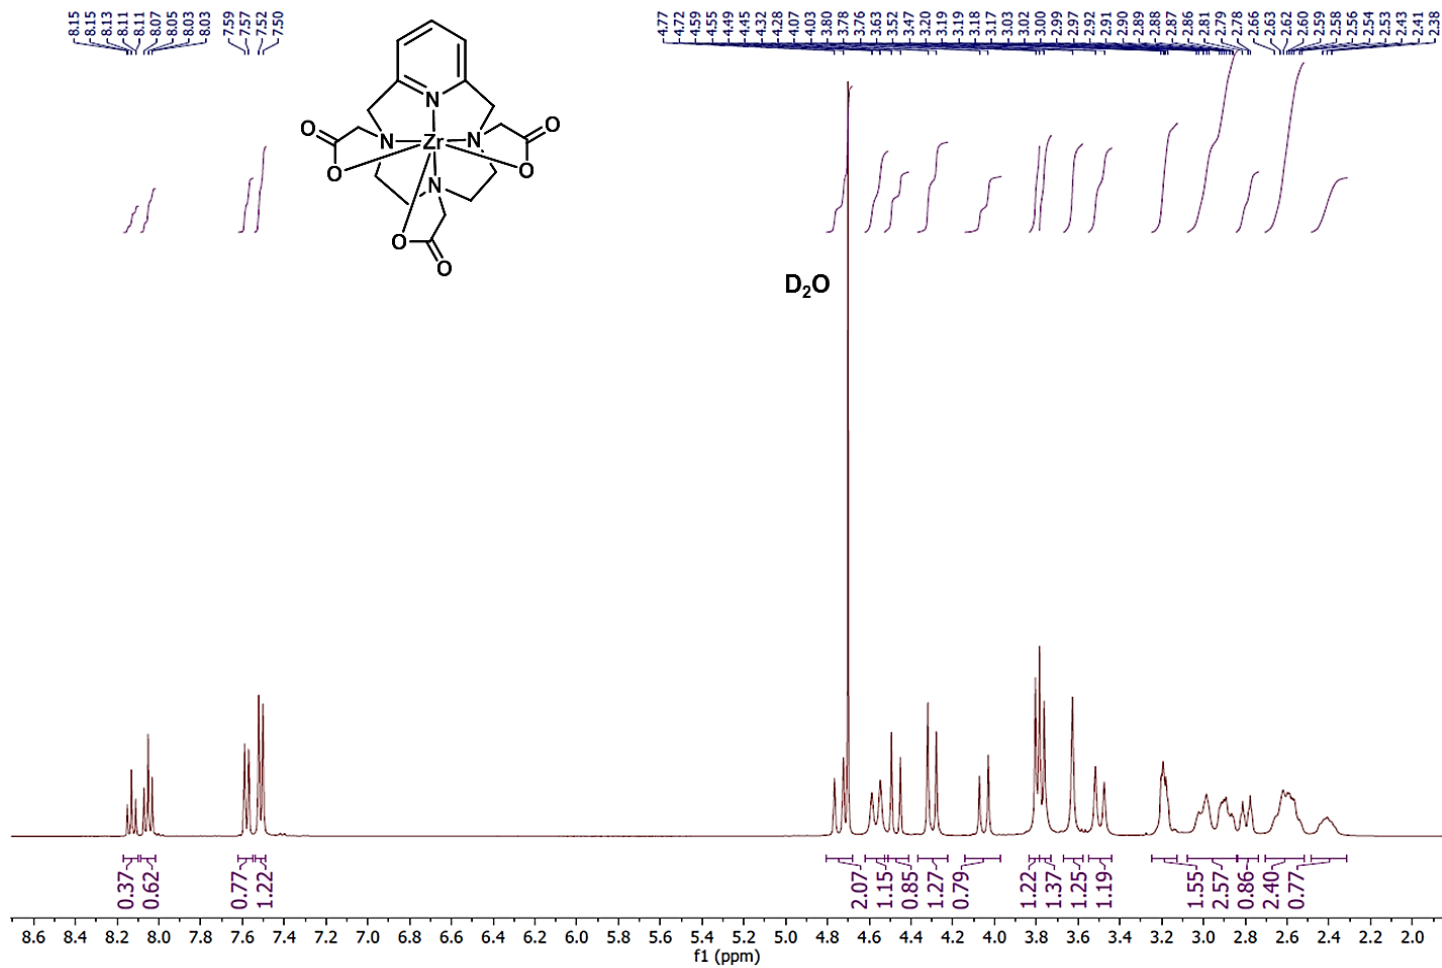

Figure S9. <sup>1</sup>H-NMR spectrum (D<sub>2</sub>O-400 MHz) of the Zr-PCTA complex

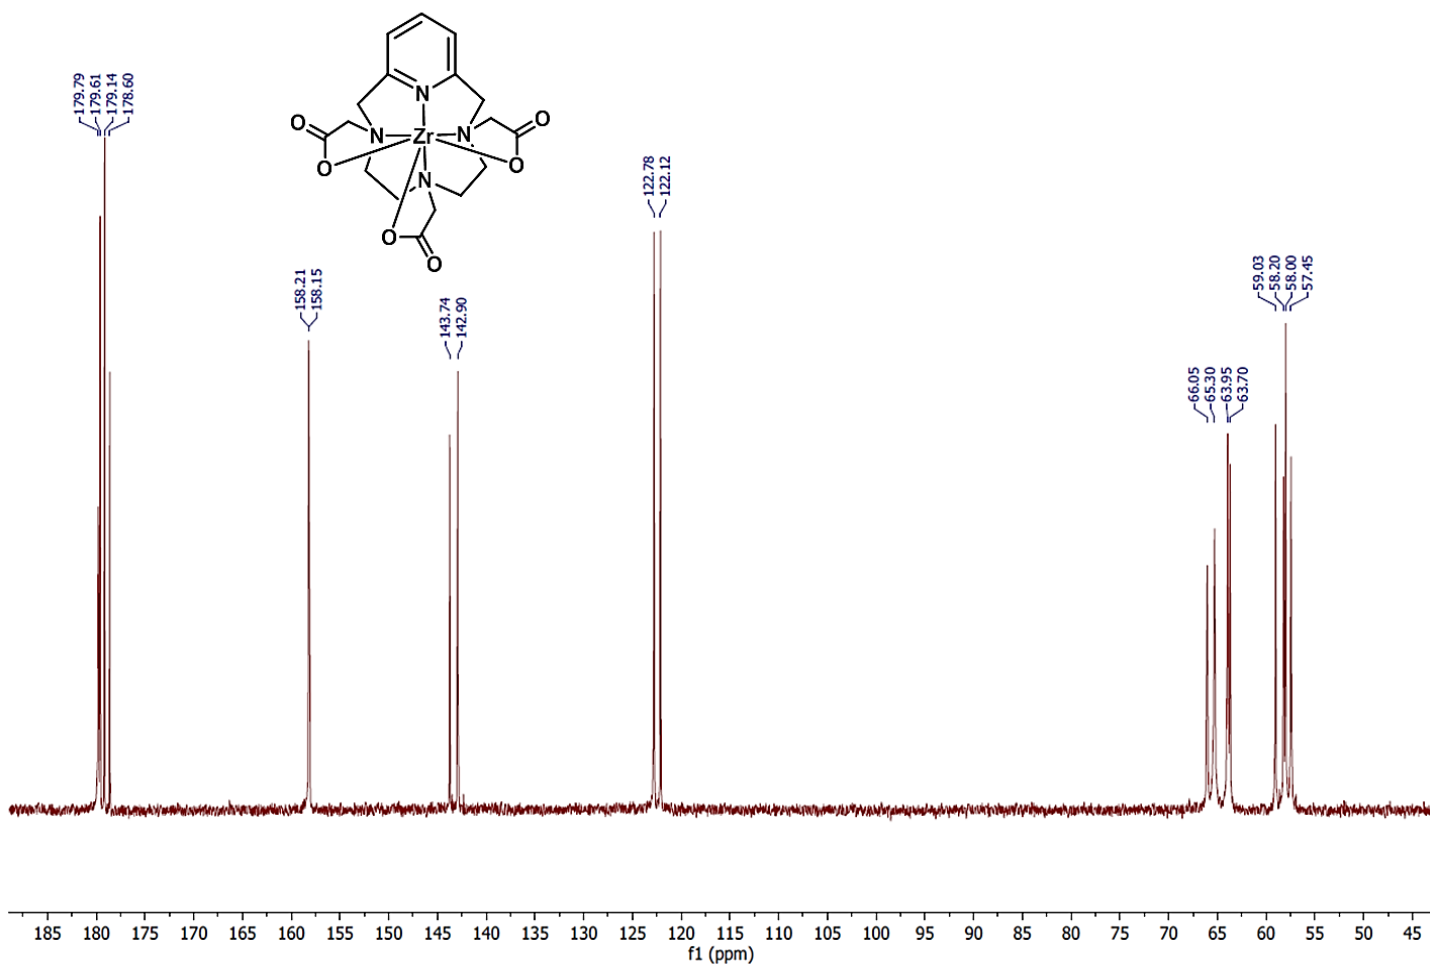

Figure S10.  $^{13}\text{C}$ -NMR spectrum ( $\text{D}_2\text{O}$ -101 MHz) of the Zr-PCTA complex

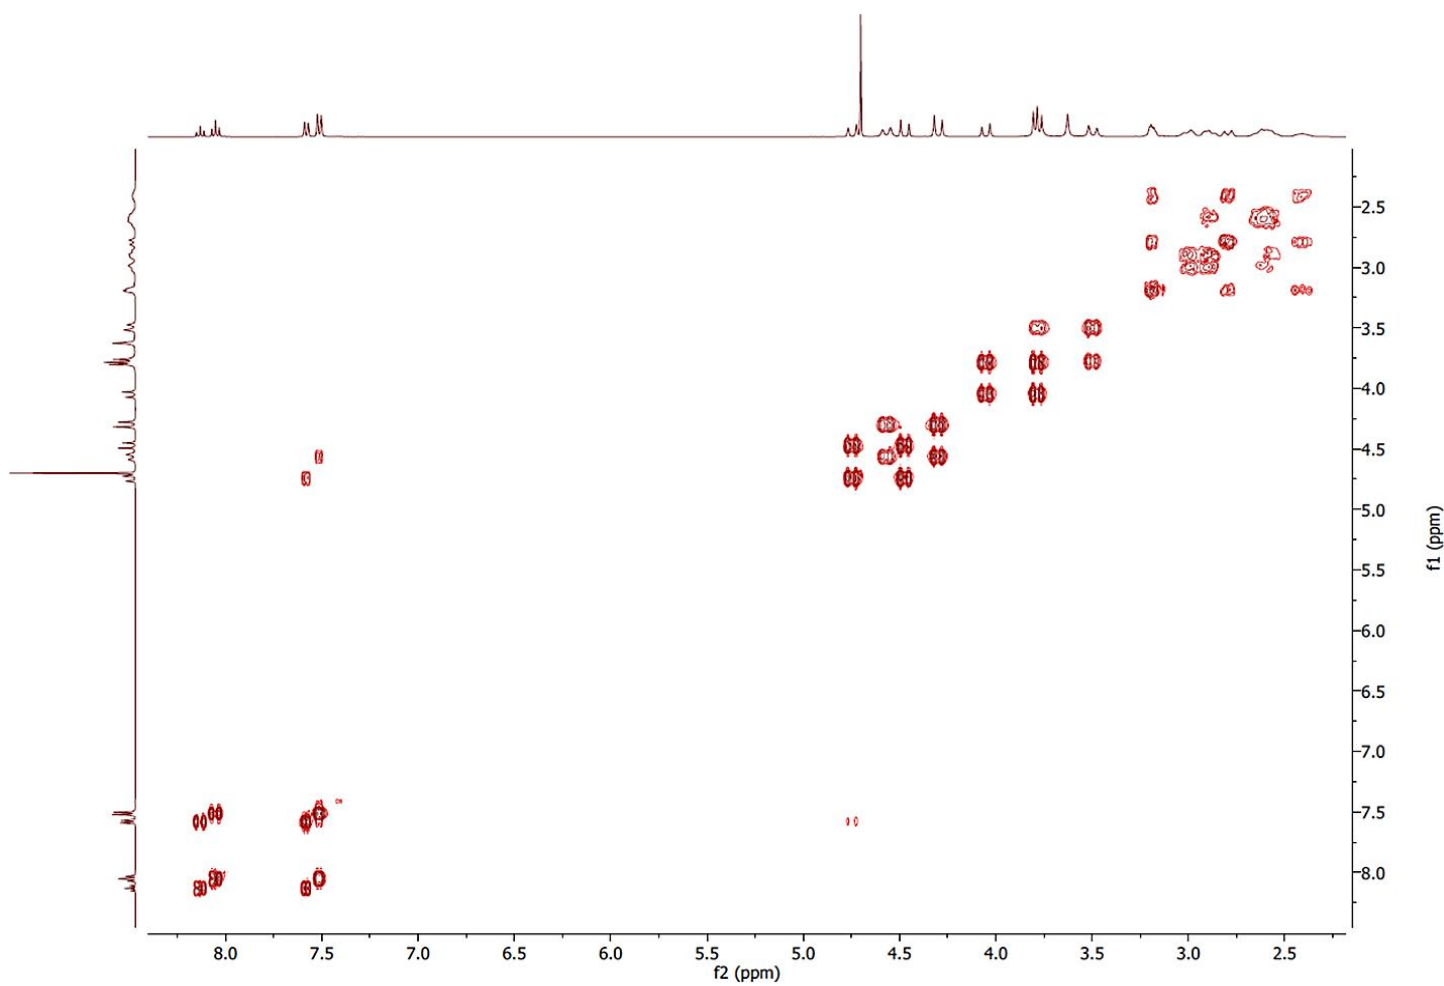

Figure S11. 2-D COSY NMR spectrum ( $D_2O$ -400 MHz) of the Zr-PCTA complex



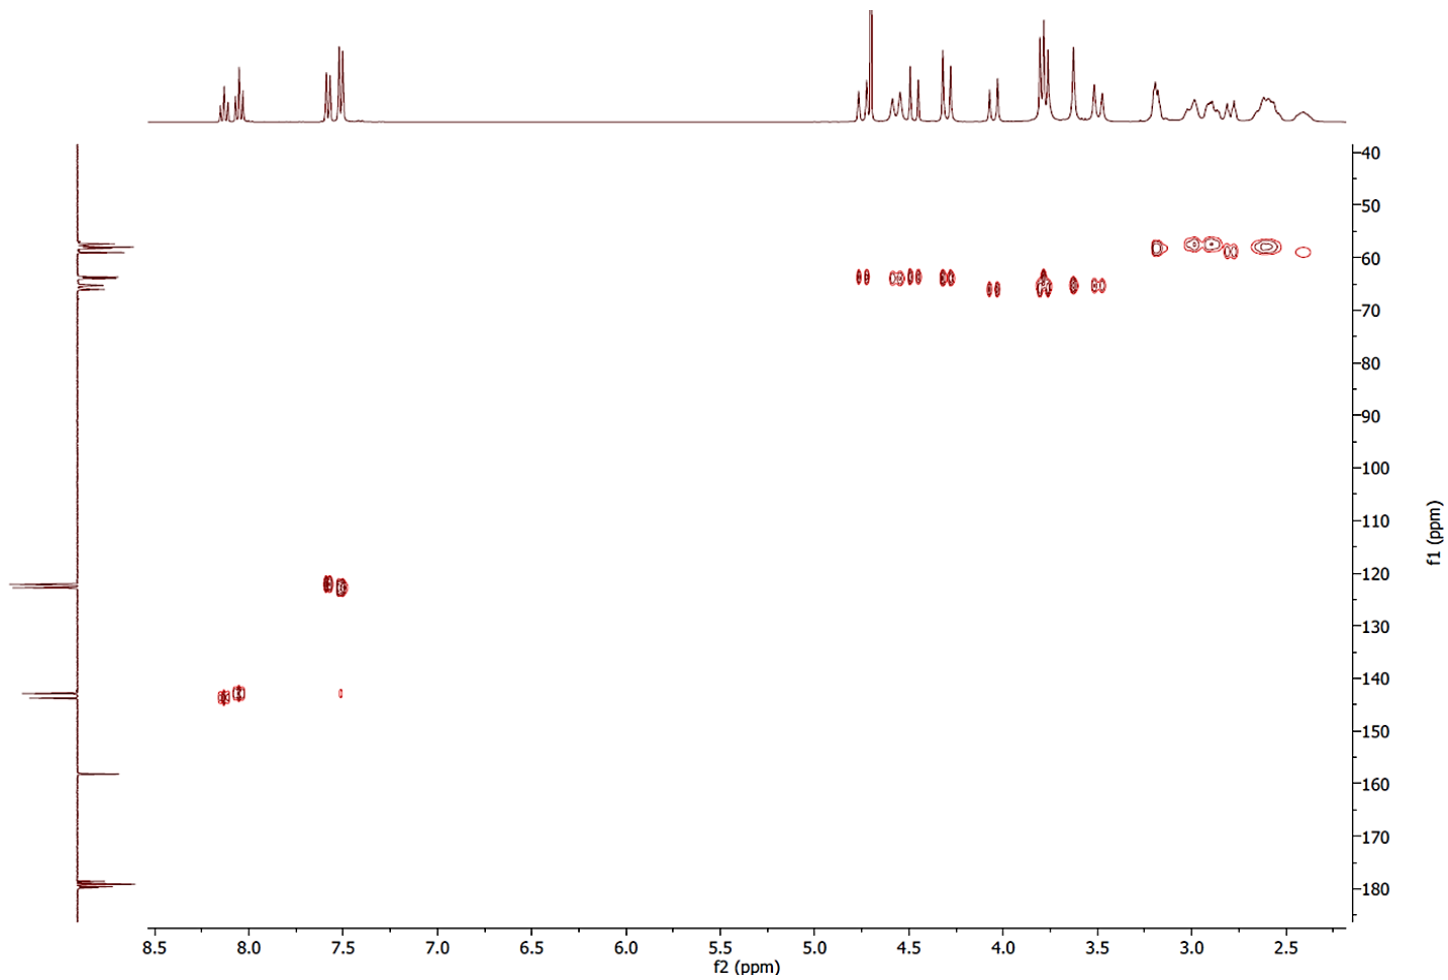

Figure S12. 2-D HSQC NMR spectrum (D<sub>2</sub>O-400 MHz) of the Zr-PCTA complex

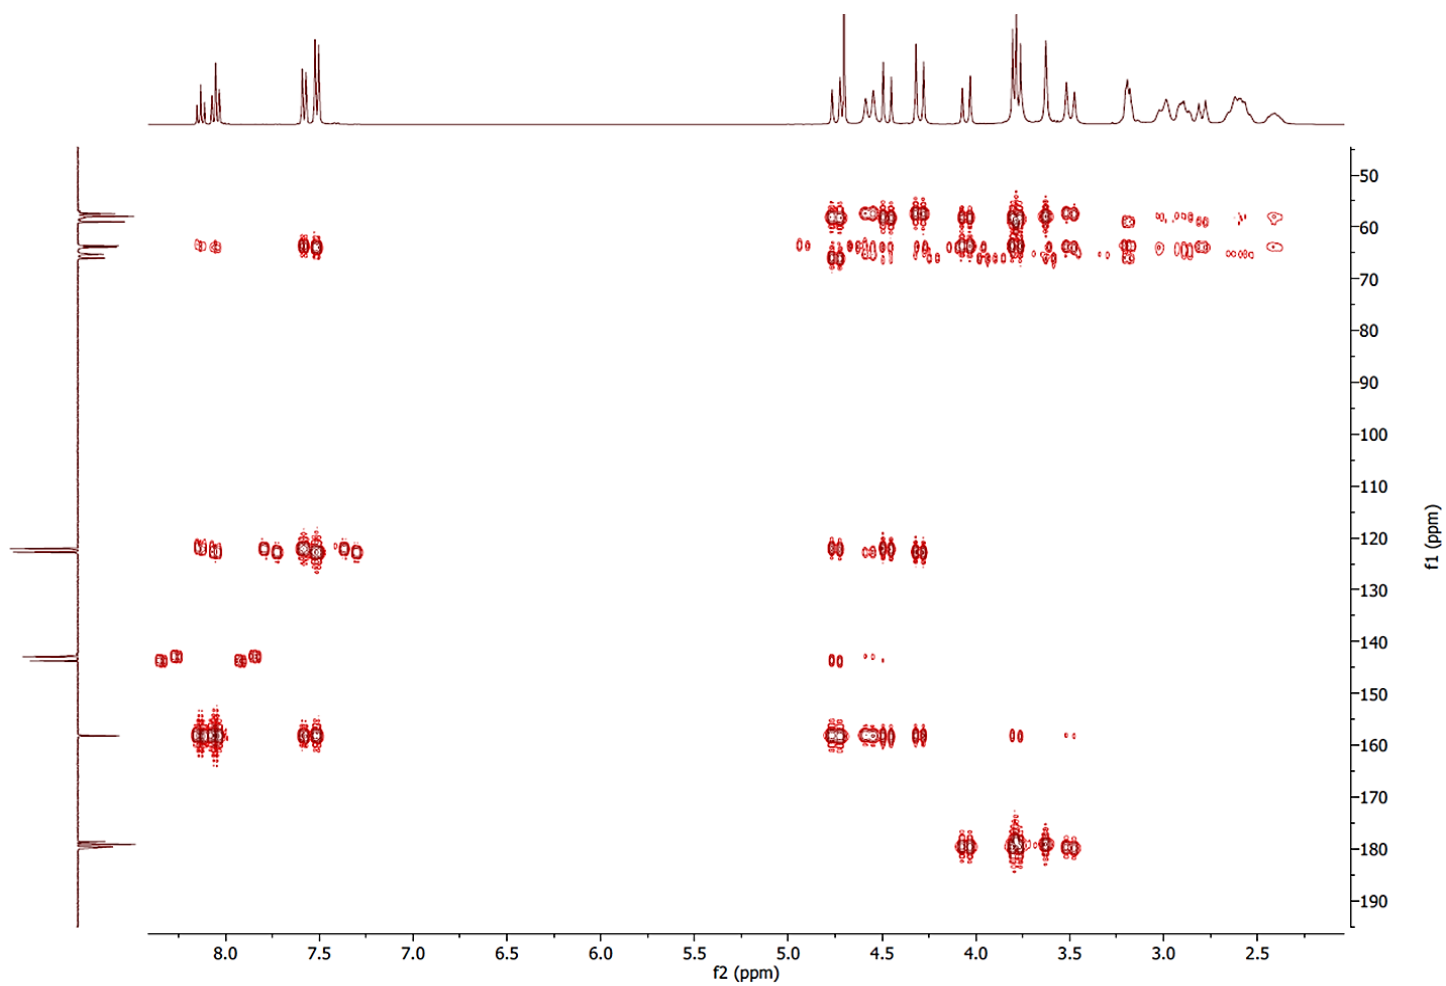

Figure S13. 2-D HMBC NMR spectrum (D<sub>2</sub>O-400 MHz) of the Zr-PCTA complex

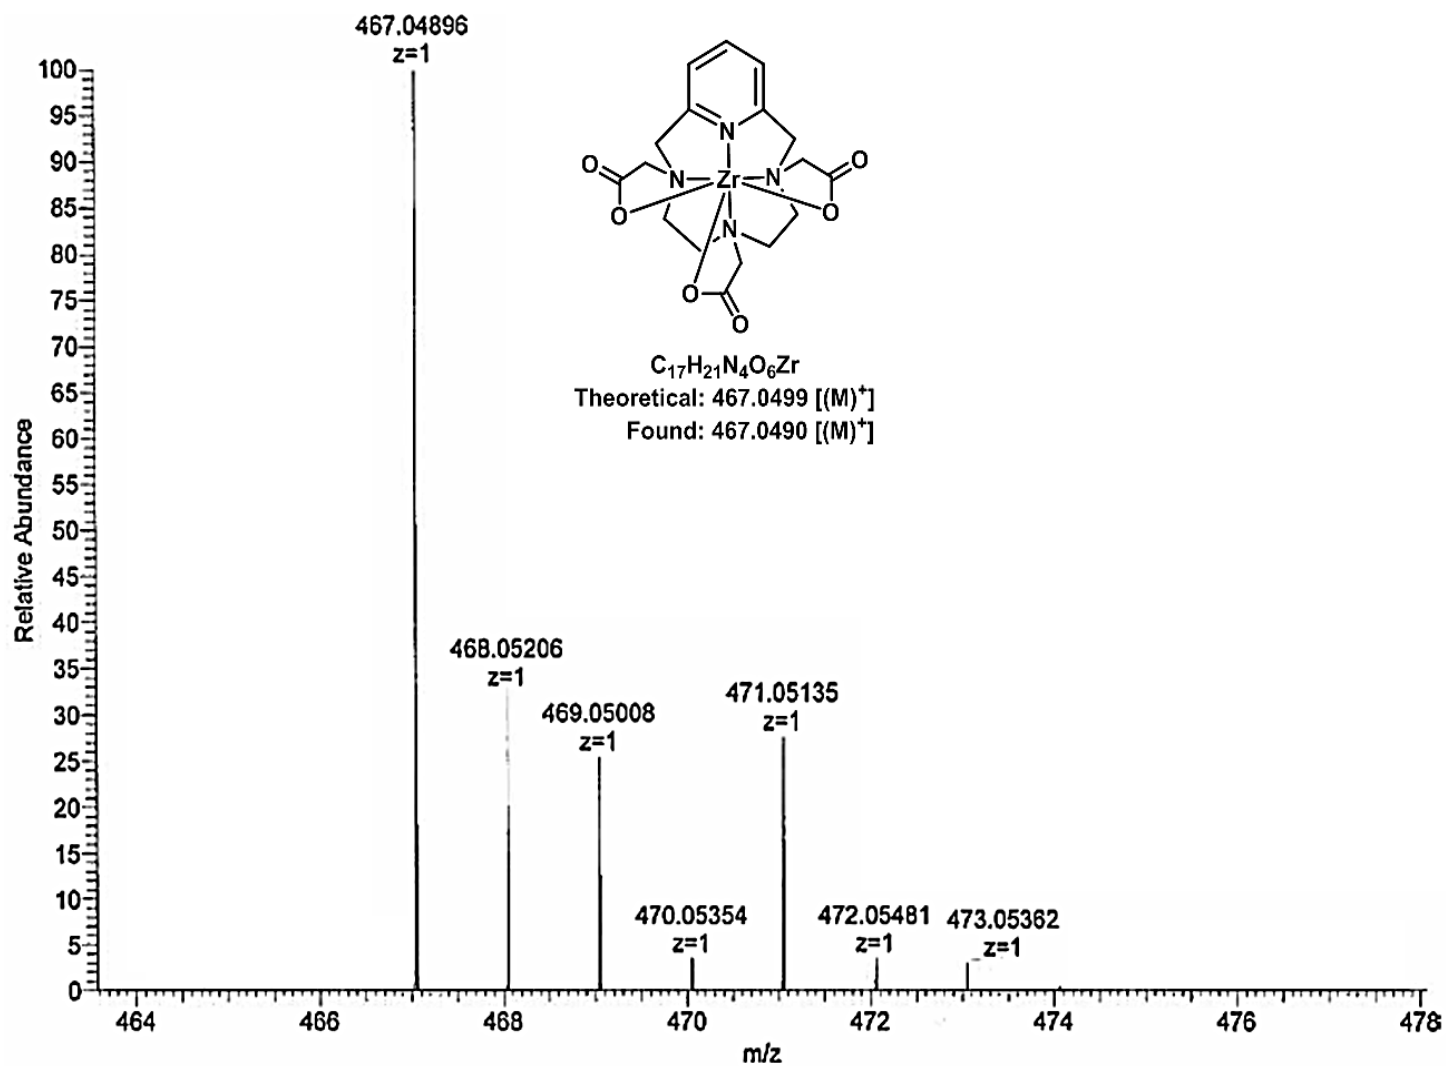

Figure S14. HR ESI FT-ICR MS (Positive mode) analysis of the Zr-PCTA complex

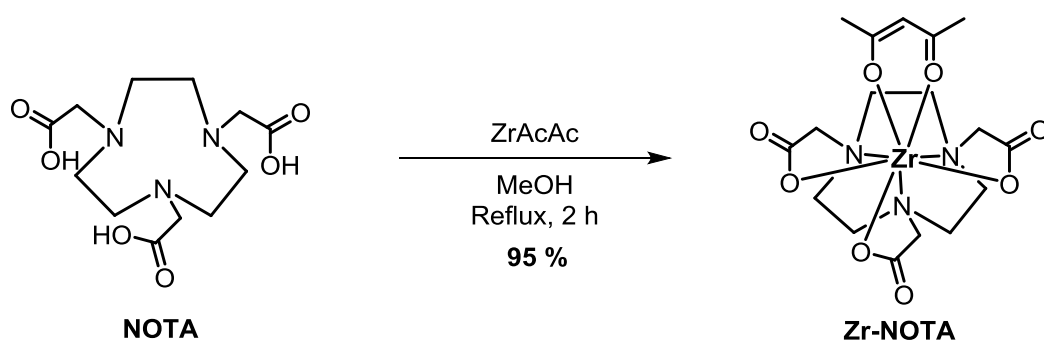

**Scheme S4. Synthesis of zirconium complex of NOTA**

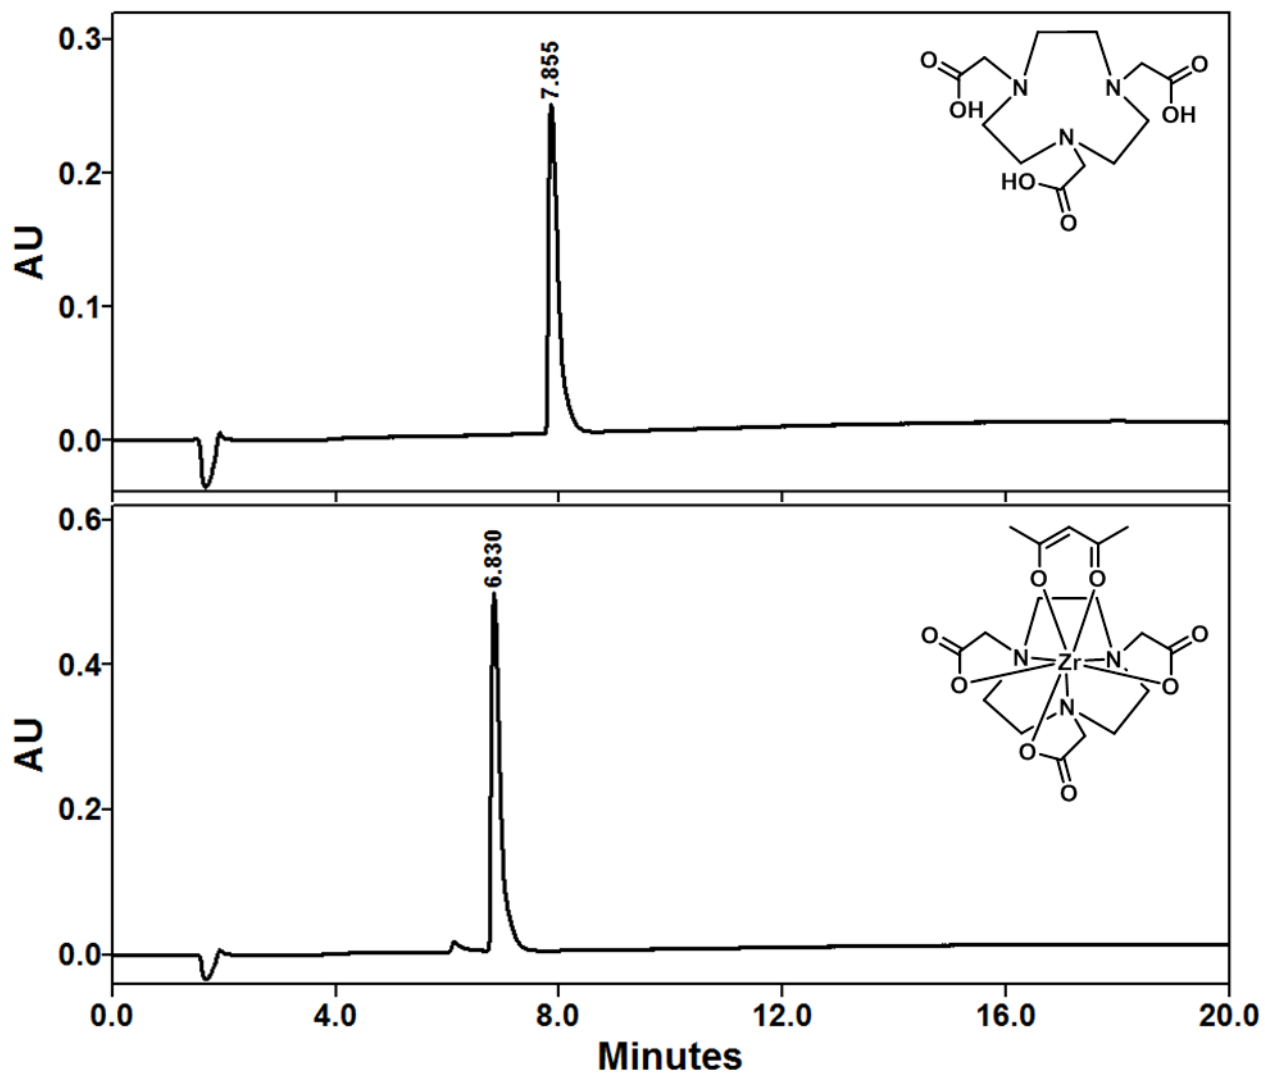

Figure S15. UV-HPLC chromatogram (201nm) of NOTA ligand (top) and nonradioactive  $^{Nat}\text{Zr}$ -NOTA-AcAc complex (bottom)

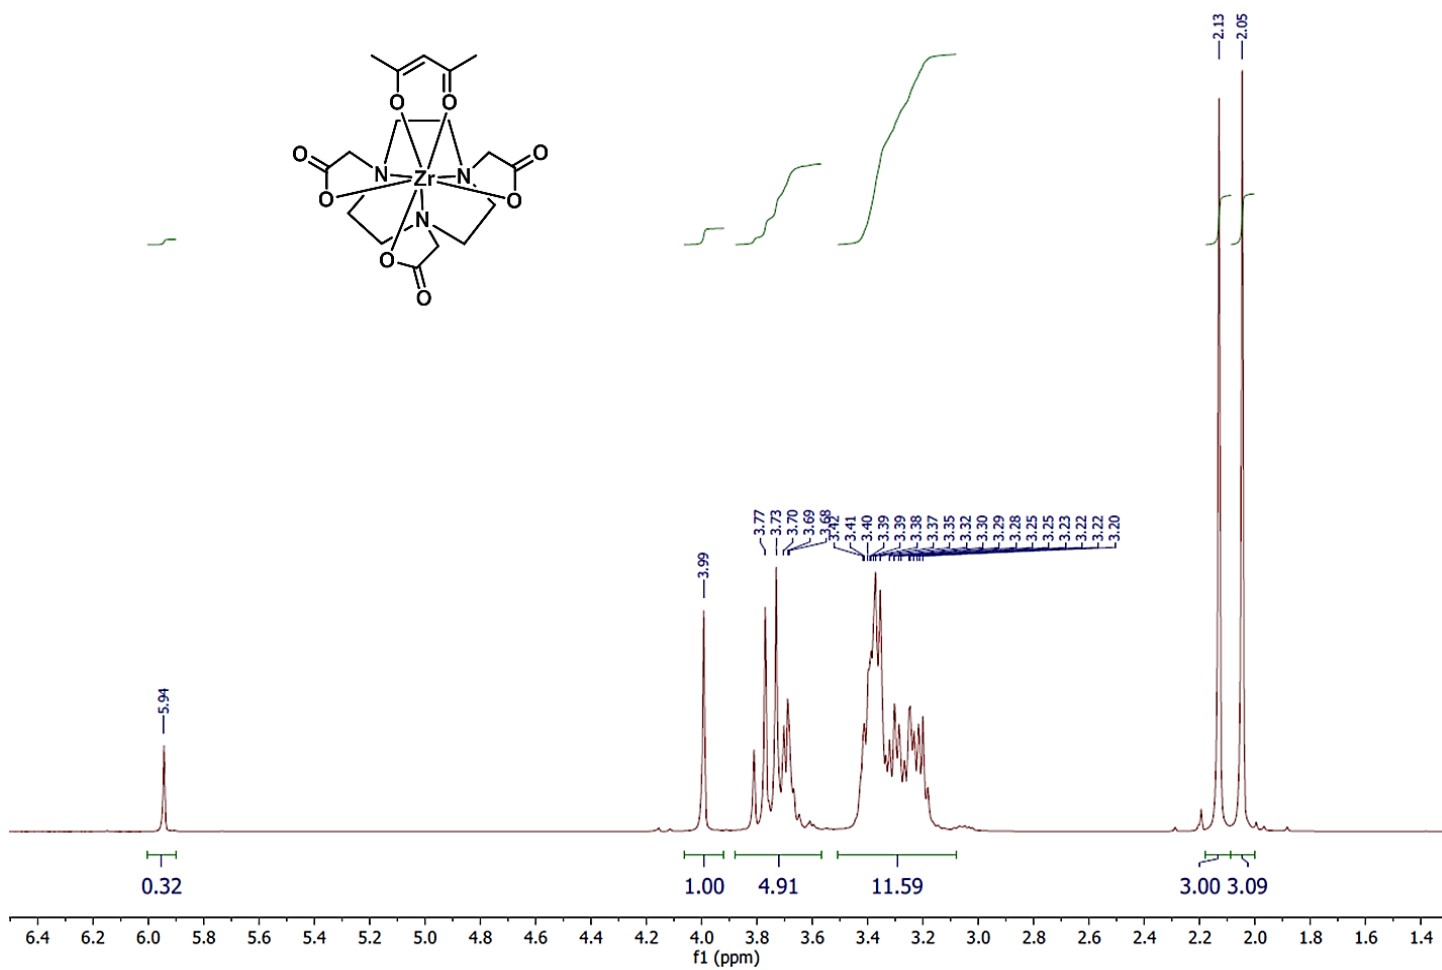

Figure S16. <sup>1</sup>H-NMR spectrum (D<sub>2</sub>O-400 MHz) of the Zr-NOTA-AcAc complex

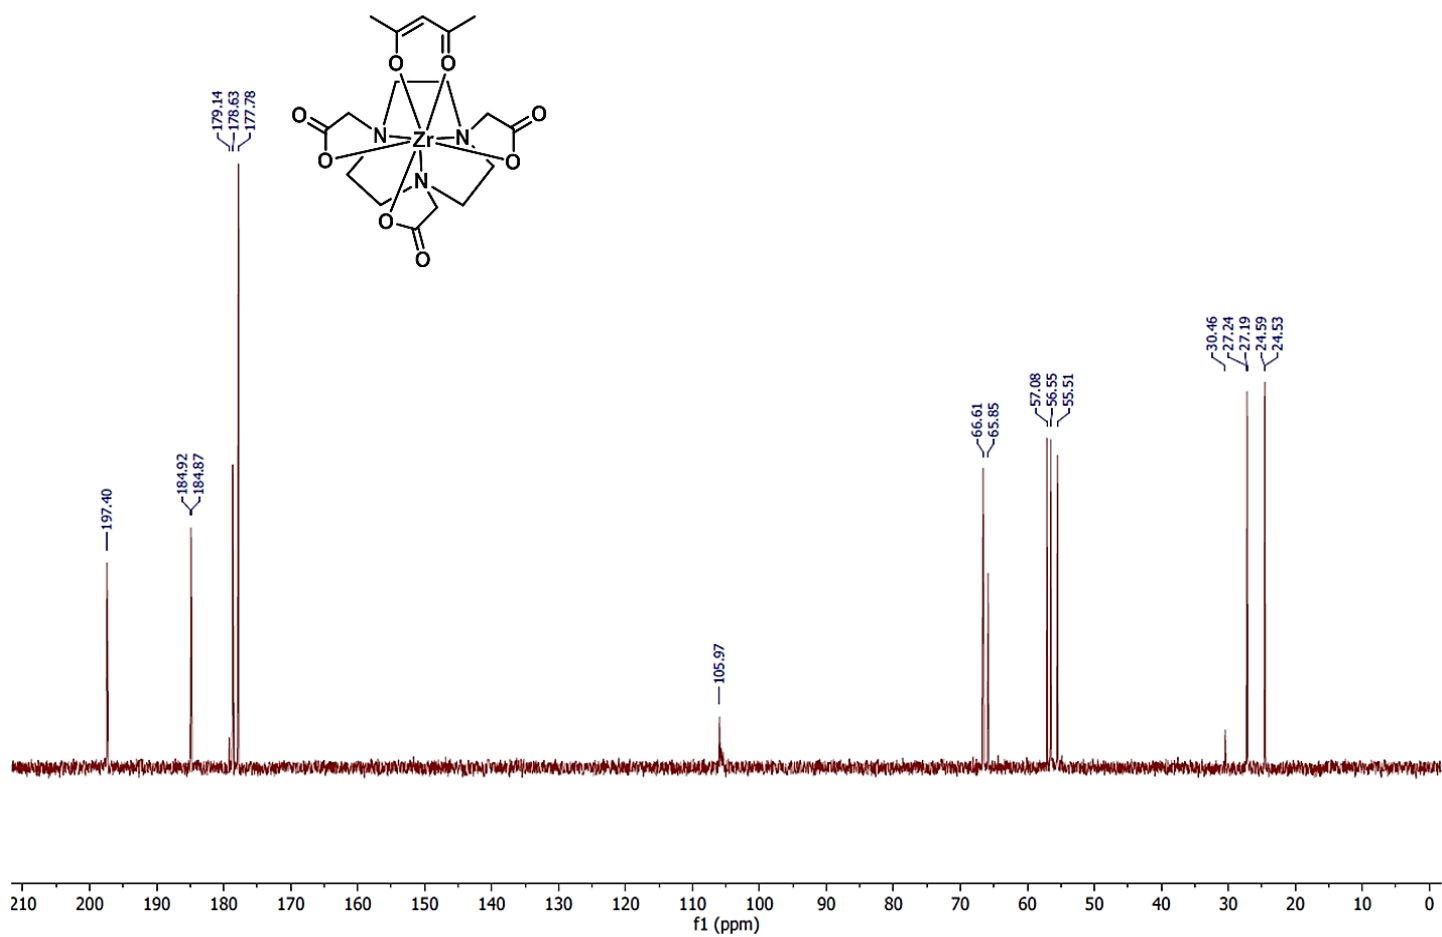

Figure S17.  $^{13}\text{C}$ -NMR spectrum ( $\text{D}_2\text{O}$ -101 MHz) of the Zr-NOTA-AcAc complex

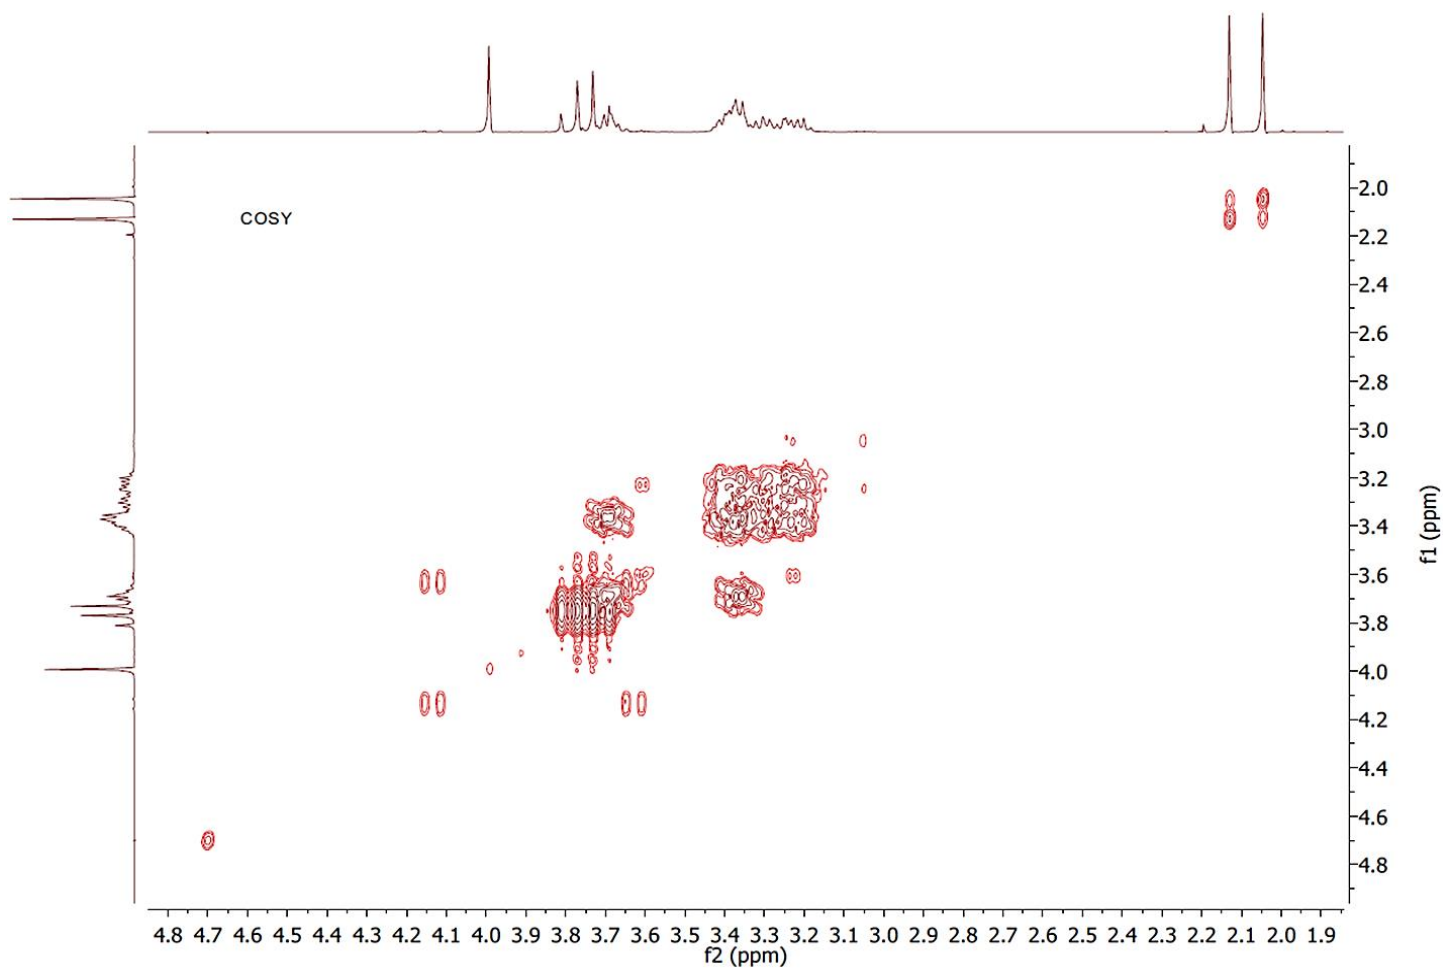

Figure S18. 2-D COSY NMR spectrum (D<sub>2</sub>O-400 MHz) of the Zr-NOTA-AcAc complex



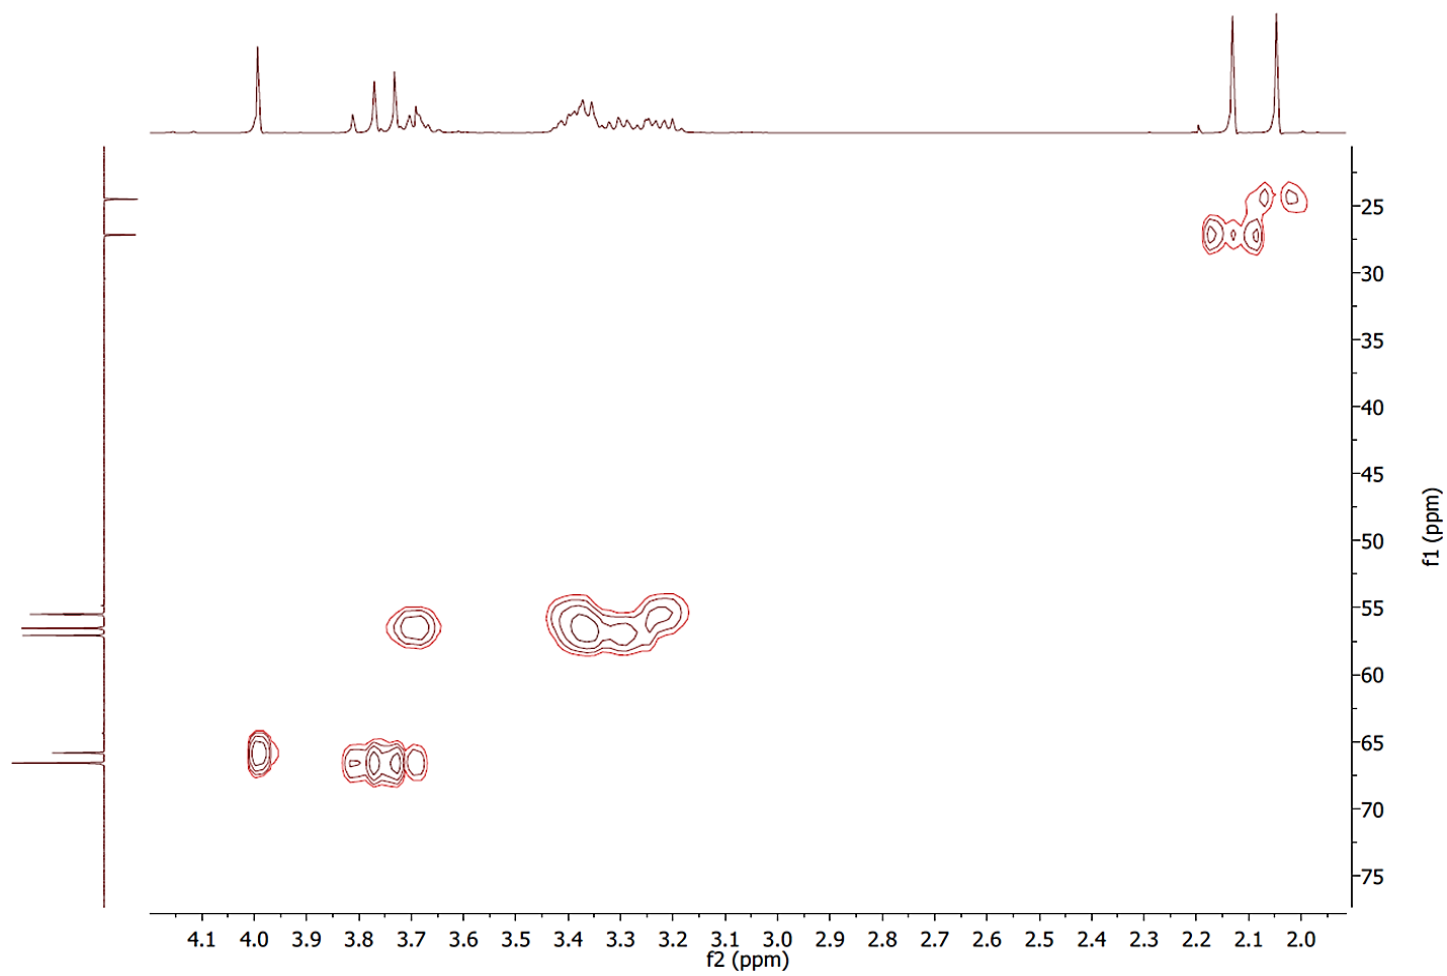

**Figure S19.** 2-D HMQC NMR spectrum ( $\text{D}_2\text{O}$ -400 MHz) of the Zr-NOTA-AcAc complex

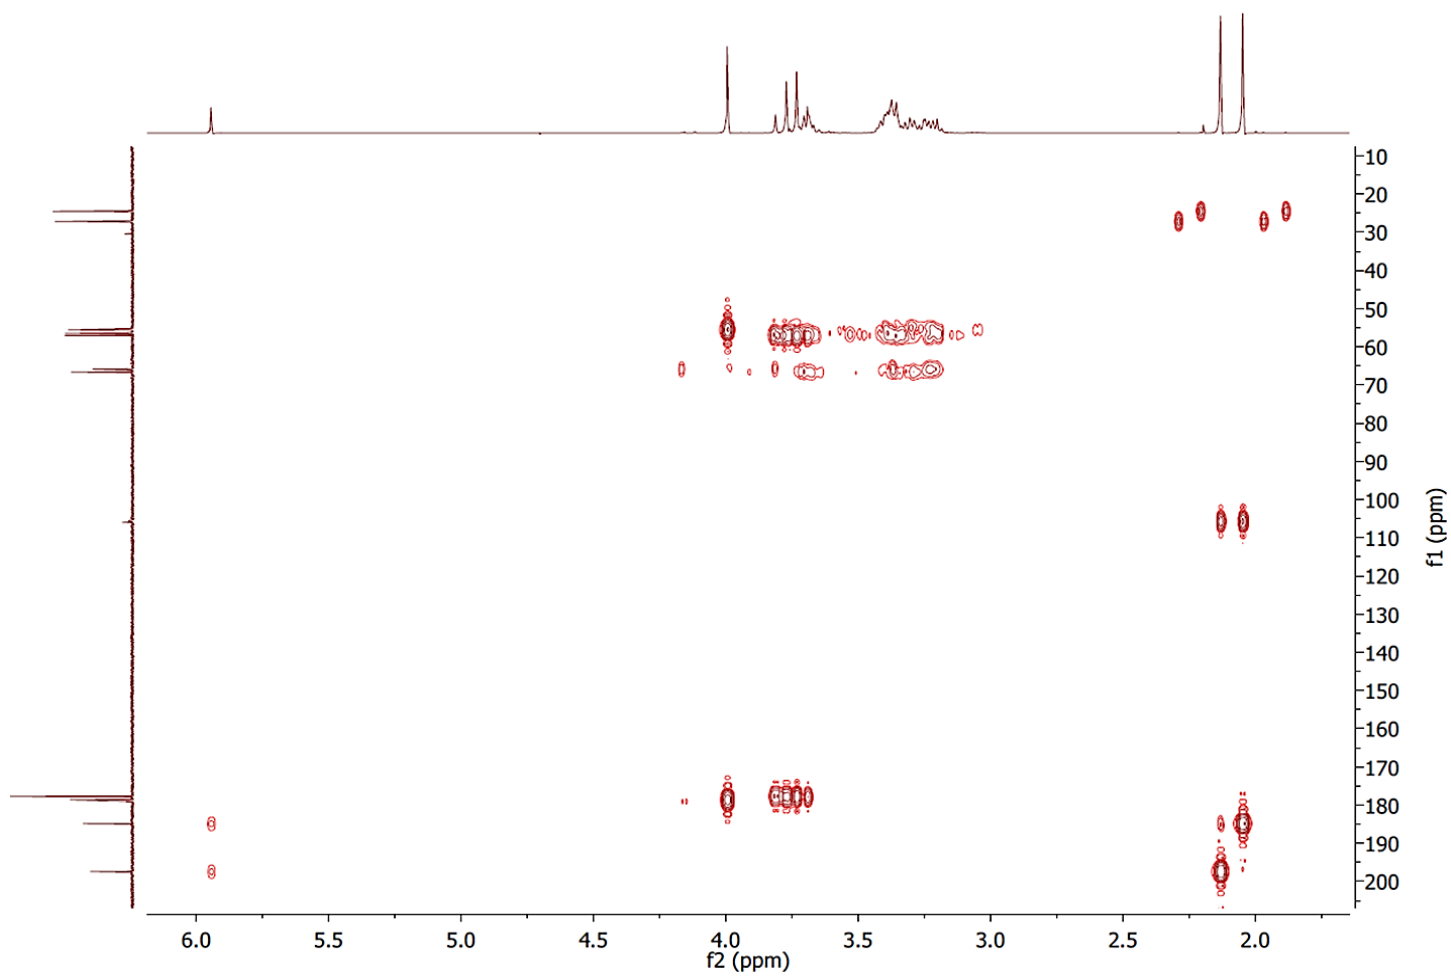

Figure S20. 2-D HMBC NMR spectrum ( $D_2O$ -400 MHz) of the Zr-NOTA-AcAc complex

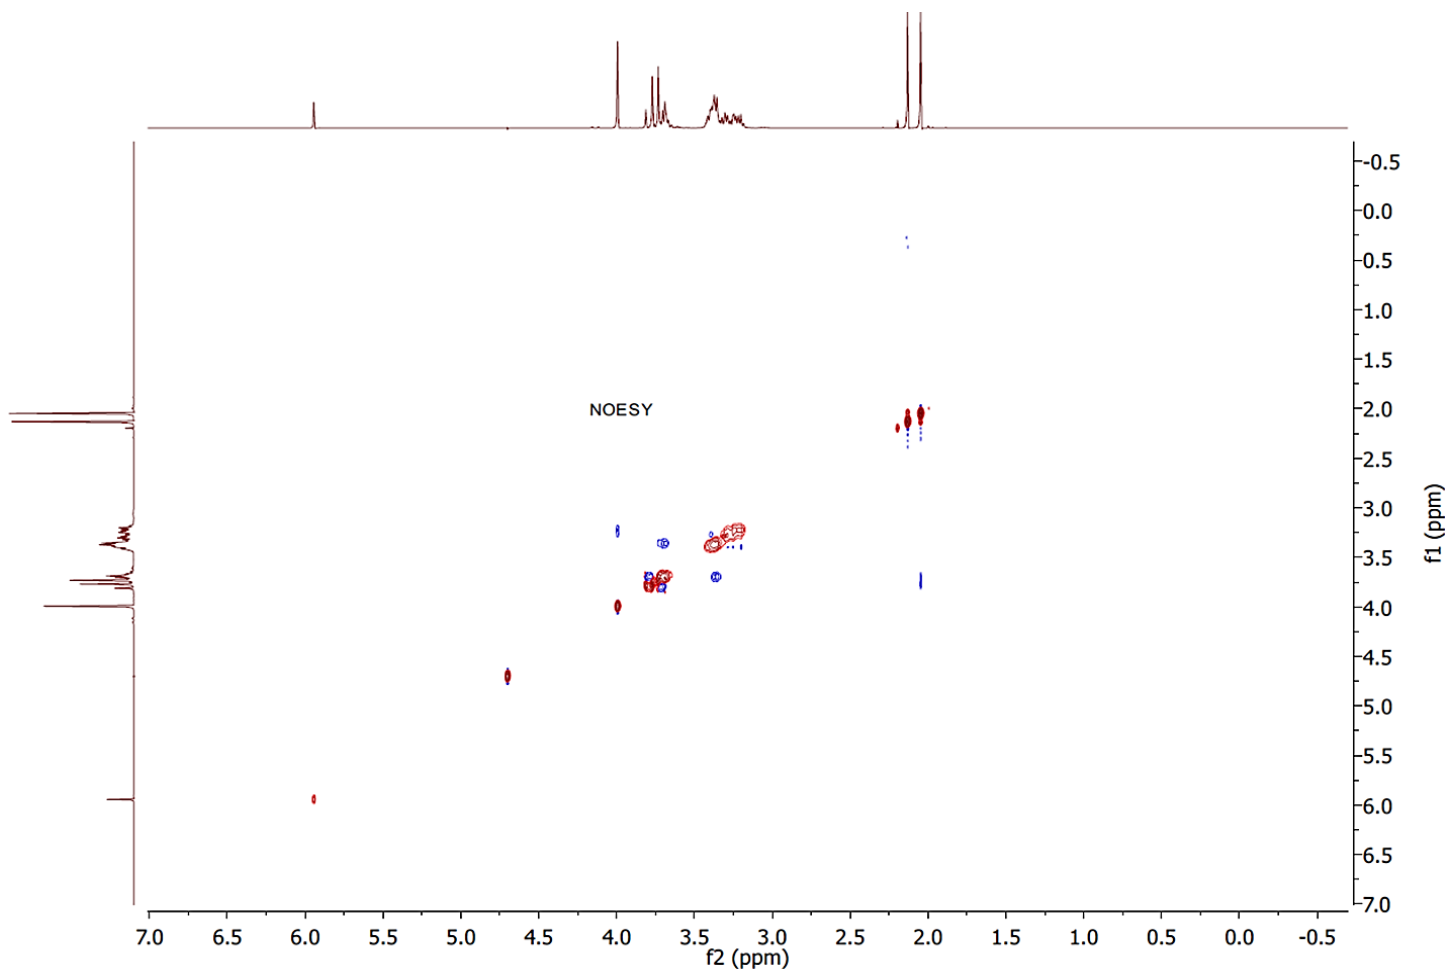

Figure S21. 2-D NOESY NMR spectrum (D<sub>2</sub>O-400 MHz) of the Zr-NOTA-AcAc complex

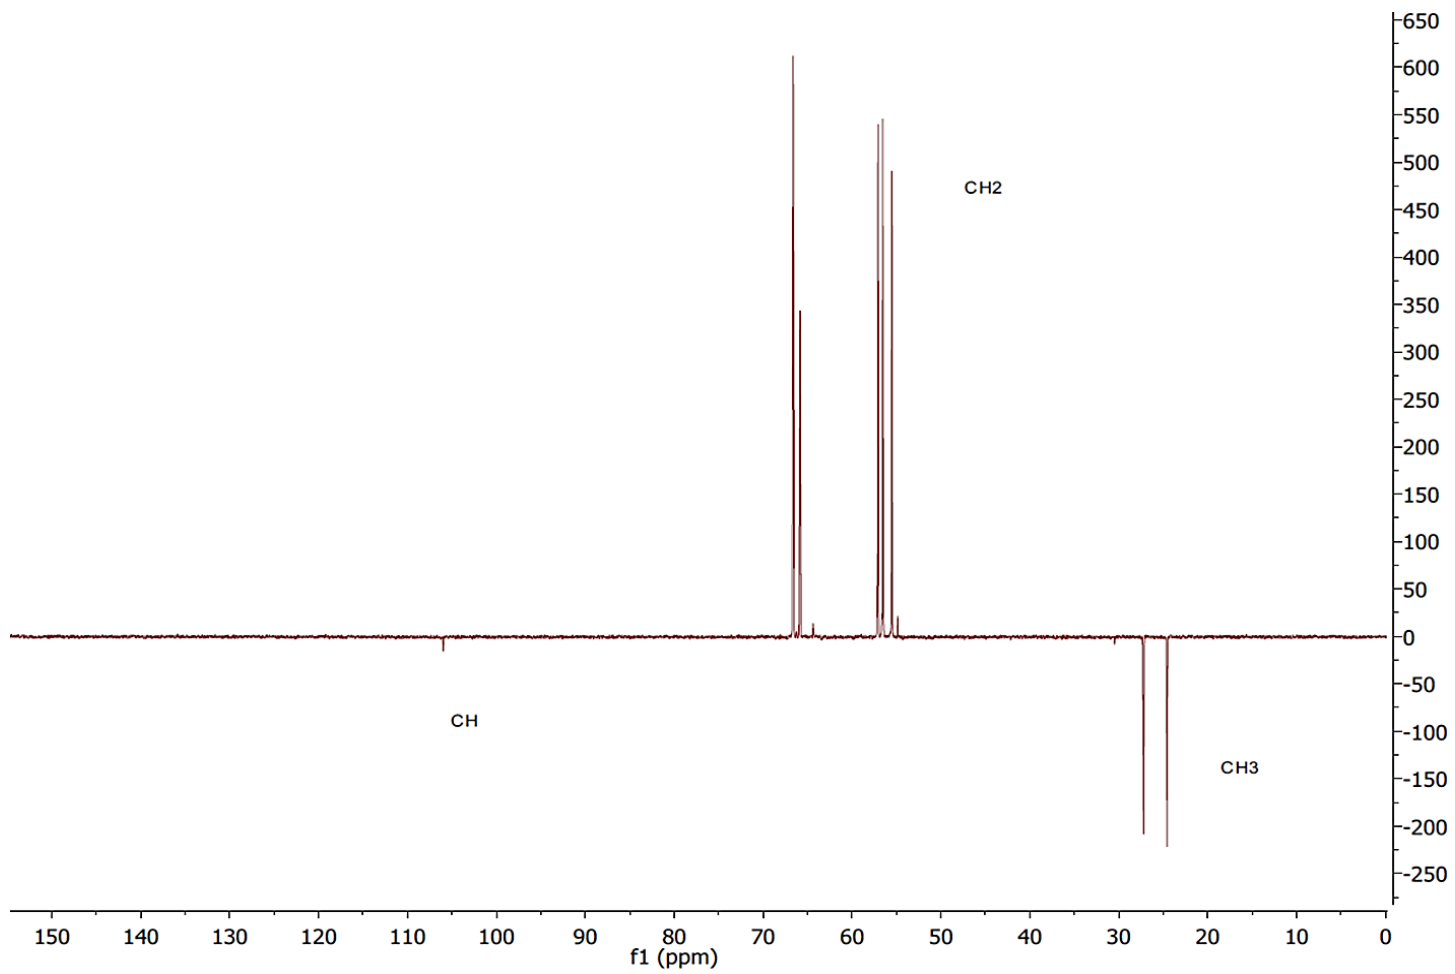

Figure S22. 2-D  $^{13}\text{C}$  APT NMR spectrum ( $\text{D}_2\text{O}$ -101 MHz) of the Zr-NOTA-AcAc complex

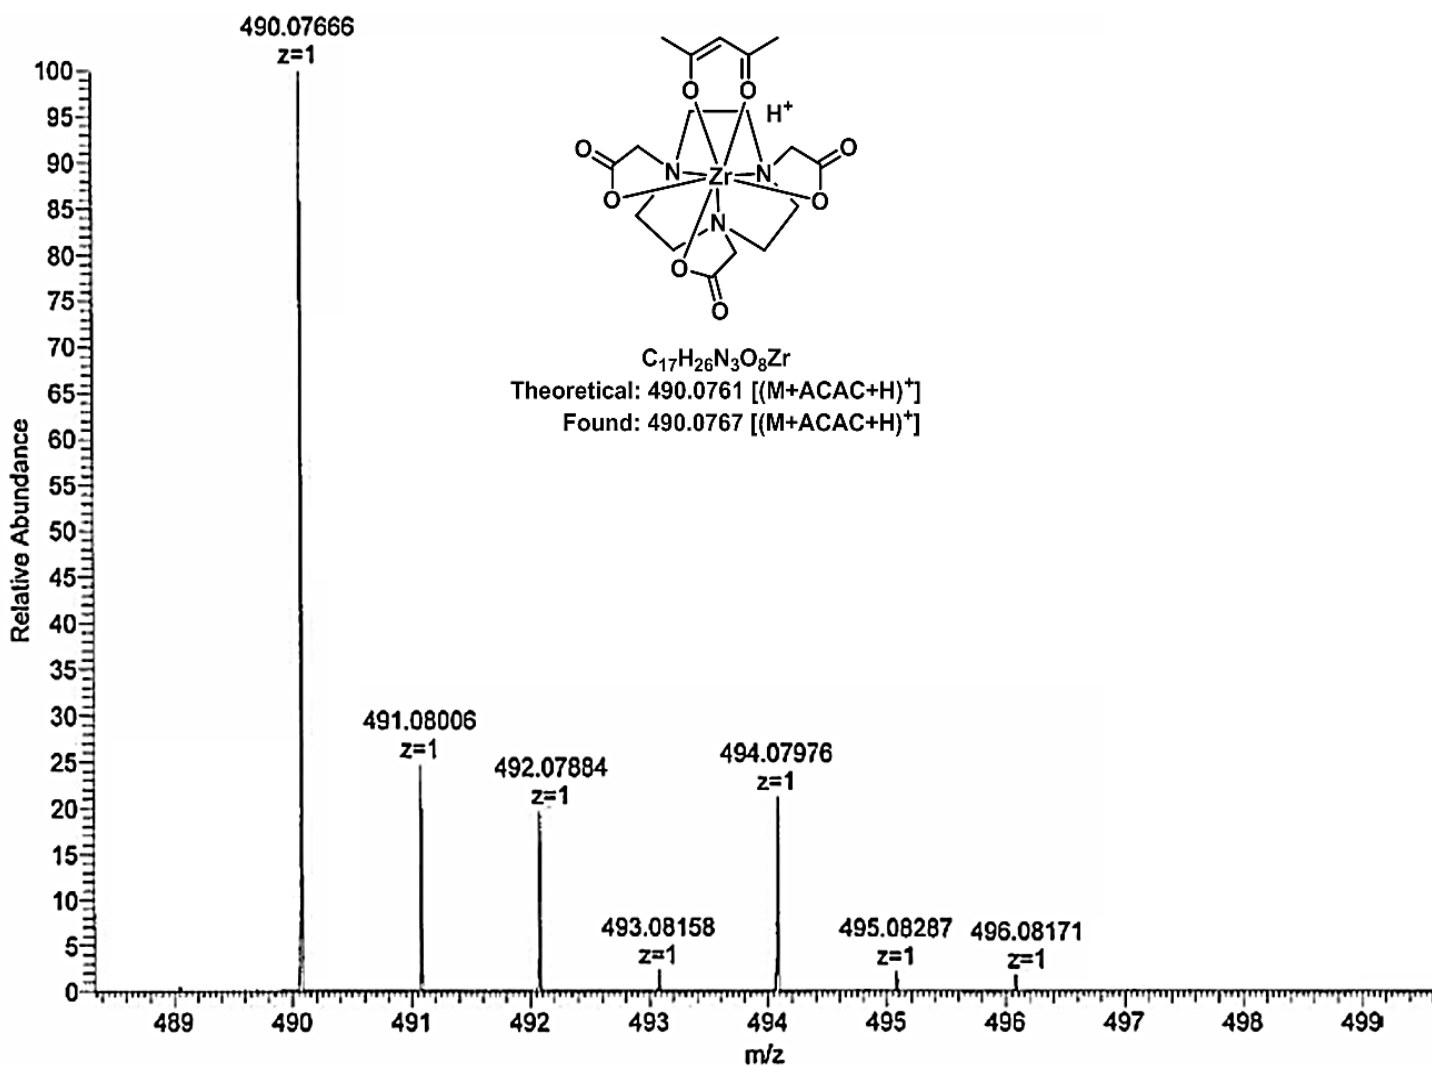

Figure S23. HR ESI FT-ICR MS (Positive mode) analysis of the Zr-NOTA-AcAc complex

## Crystal Structure Analysis of Zr-TRITA, [Zr(C<sub>17</sub>H<sub>26</sub>N<sub>4</sub>O<sub>8</sub>)] – 3.33 H<sub>2</sub>O

### Crystallographic Experimental Details:

**Data Collection and Structure Solution.** A clear colourless needle-like specimen of [Zr(C<sub>17</sub>H<sub>26</sub>N<sub>4</sub>O<sub>8</sub>)] – 3.33 H<sub>2</sub>O, approximate dimensions 0.010 mm x 0.040 mm x 0.470 mm, was used for the X-ray crystallographic analysis. The X-ray intensity data were measured on a Bruker APEX CCD system equipped with a graphite monochromator and a MoK<sub>α</sub> sealed x-ray tube ( $\lambda = 0.71073 \text{ \AA}$ ). X-rays were provided by a fine-focus sealed x-ray tube operated at 50kV and 30mA.

The total exposure time was 18.65 hours. The frames were integrated with the Bruker SAINT Software<sup>1</sup> package using a narrow-frame algorithm. The integration of the data using a monoclinic unit cell yielded a total of 61502 reflections to a maximum  $\theta$  angle of 30.14° (0.71 Å resolution), of which 19202 were independent (average redundancy 3.203, completeness = 99.4%,  $R_{\text{int}} = 5.90\%$ ,  $R_{\text{sig}} = 7.12\%$ ) and 16822 (87.61%) were greater than  $2\sigma(F^2)$ . The final cell constants of  $a = 19.2657 (17) \text{ \AA}$ ,  $b = 6.9888 (6) \text{ \AA}$ ,  $c = 49.787 (4) \text{ \AA}$ ,  $\beta = 99.7028 (11)^\circ$ , volume =  $6607.6 (10) \text{ \AA}^3$ , are based upon the refinement of the XYZ-centroids of 9909 reflections above  $20 \sigma(I)$  with  $6.826^\circ < 2\theta < 55.22^\circ$ . Data were corrected for absorption effects using the multi-scan method (SADABS)<sup>2</sup>. The ratio of minimum to maximum apparent transmission was 0.841. The calculated minimum and maximum transmission coefficients (based on crystal size) are 0.776 and 0.994.

The structure was solved and refined using the Bruker SHELXTL Software Package<sup>3</sup>, using the space group Cc, with  $Z = 12$  for the formula unit, [Zr(C<sub>17</sub>H<sub>26</sub>N<sub>4</sub>O<sub>8</sub>)] - 3.33 H<sub>2</sub>O (3 formula units/asymmetric unit). The hydrogen atoms of the "TRITA" ligand were included in the structural model as fixed atoms (using idealized sp<sup>3</sup>-hybridized geometry and C-H bond lengths of 0.99Å) "riding" on their respective carbon atoms. The isotropic thermal parameters for all "TRITA" hydrogen atoms were fixed at values 1.2 times the equivalent isotropic thermal parameter of the carbon atom to which they are covalently bonded. The isotropic thermal parameters of the water hydrogen atoms were allowed to refine independently. The final anisotropic full-matrix least-squares refinement on  $F^2$  with 981 variables converged at  $R_1 = 3.96\%$ , for the observed data and  $wR_2 = 7.93\%$  for all data. The goodness-of-fit was 0.996. The largest peak in the final difference electron density synthesis was  $0.550 \text{ e}^-/\text{\AA}^3$  and the largest hole was  $-0.618 \text{ e}^-/\text{\AA}^3$  with an RMS deviation of  $0.078 \text{ e}^-/\text{\AA}^3$ . On the basis of the final model, the calculated density was  $1.706 \text{ g/cm}^3$  and  $F(000)$ , 3520 e<sup>-</sup>.

**Refinement Details.** Crystal data, data collection and structure refinement details are summarized in tables below.

**Computing details.** Data collection: Bruker *APEX3* v2016.1-0; cell refinement: Bruker *APEX3* v2016.1-0; data reduction: Bruker *APEX2* v2014.11-0; program(s) used to solve structure: *SHELXS97* (Sheldrick 2008); program(s) used to refine structure: *SHELXL2014* (Sheldrick, 2014); molecular graphics: Bruker *APEX2* v2014.11-0; software used to prepare material for publication: Bruker *APEX2* v2014.11-0<sup>1-6</sup>.

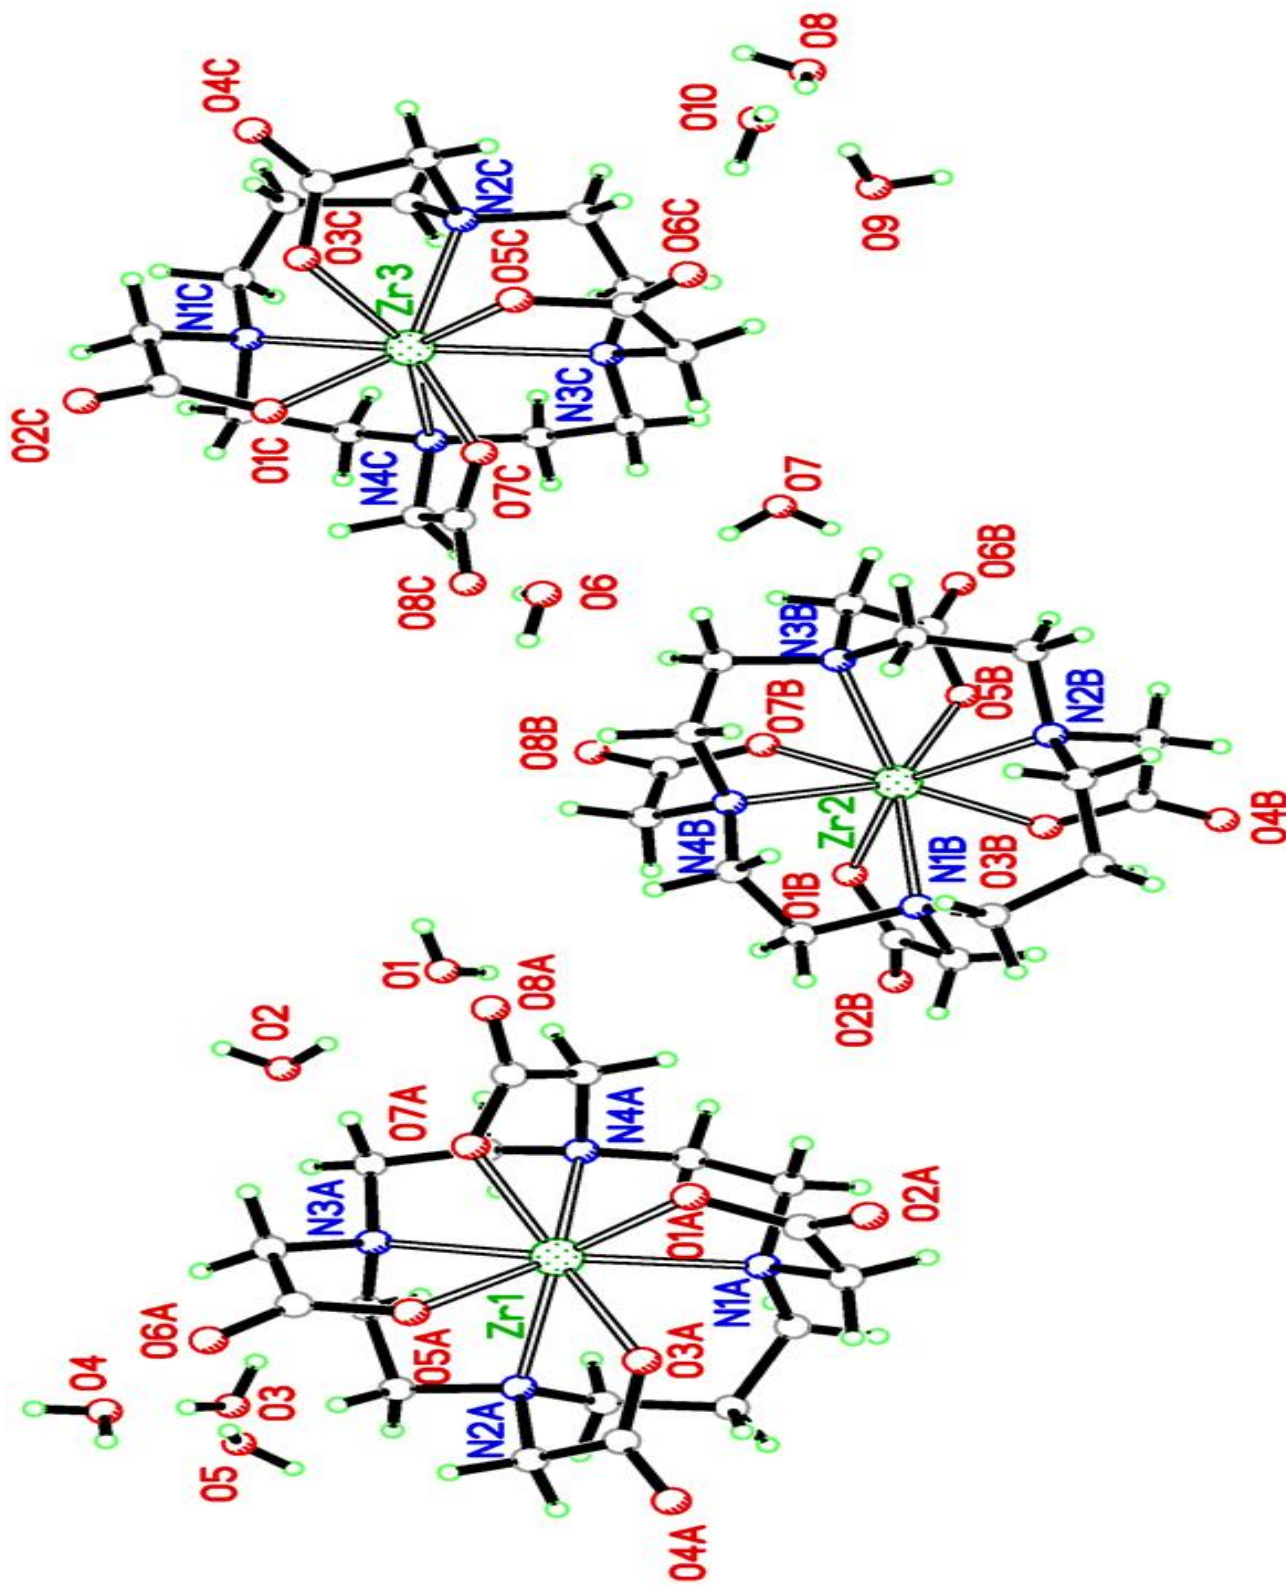

Figure S24. Plot for  $[\text{Zr}(\text{C}_{17}\text{H}_{26}\text{N}_4\text{O}_8)] \cdot 3.33 \text{H}_2\text{O}$  showing the contents of the asymmetric unit. All atoms are represented by arbitrary-sized spheres and only selected atoms are labeled.



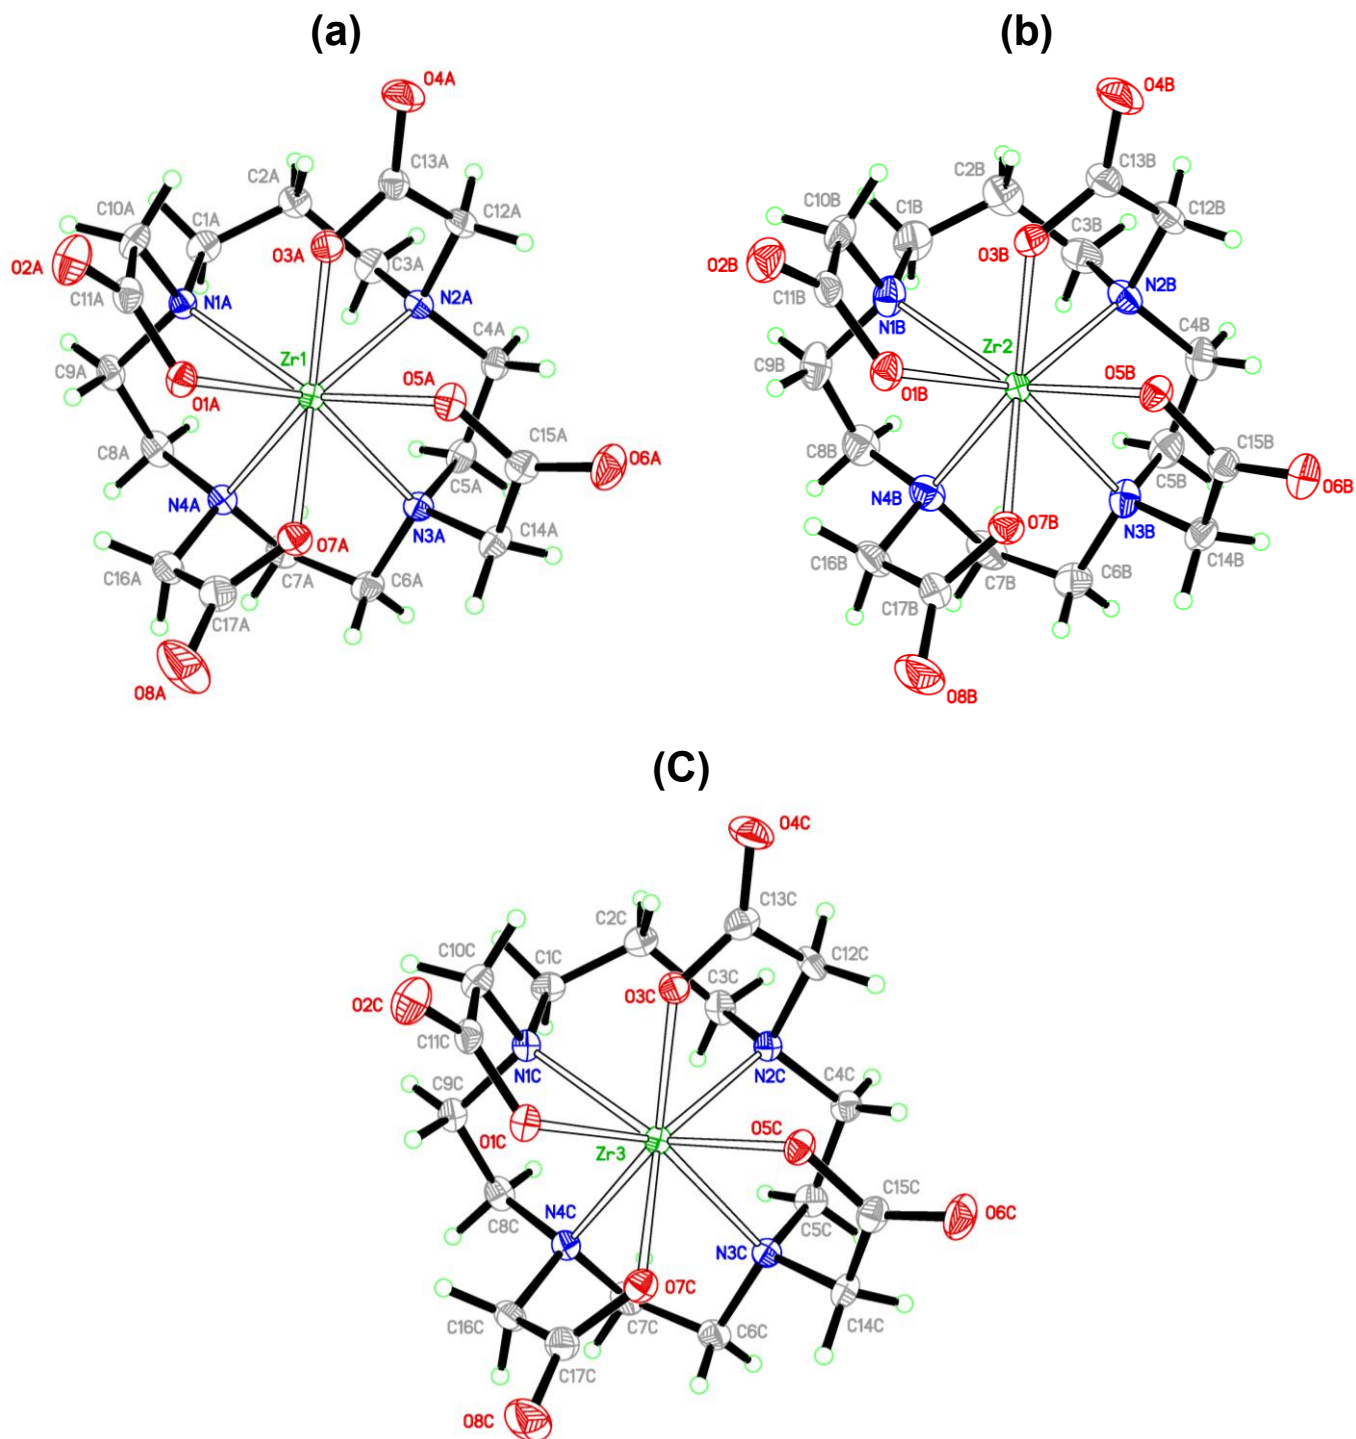

Figure S25. 50% probability plots for the 3 crystallographically-independent [Zr(C<sub>17</sub>H<sub>26</sub>N<sub>4</sub>O<sub>8</sub>)] molecules in the solid-state structure of [Zr(C<sub>17</sub>H<sub>26</sub>N<sub>4</sub>O<sub>8</sub>)] – 3.33 H<sub>2</sub>O with hydrogen atoms represented by arbitrary-sized spheres.

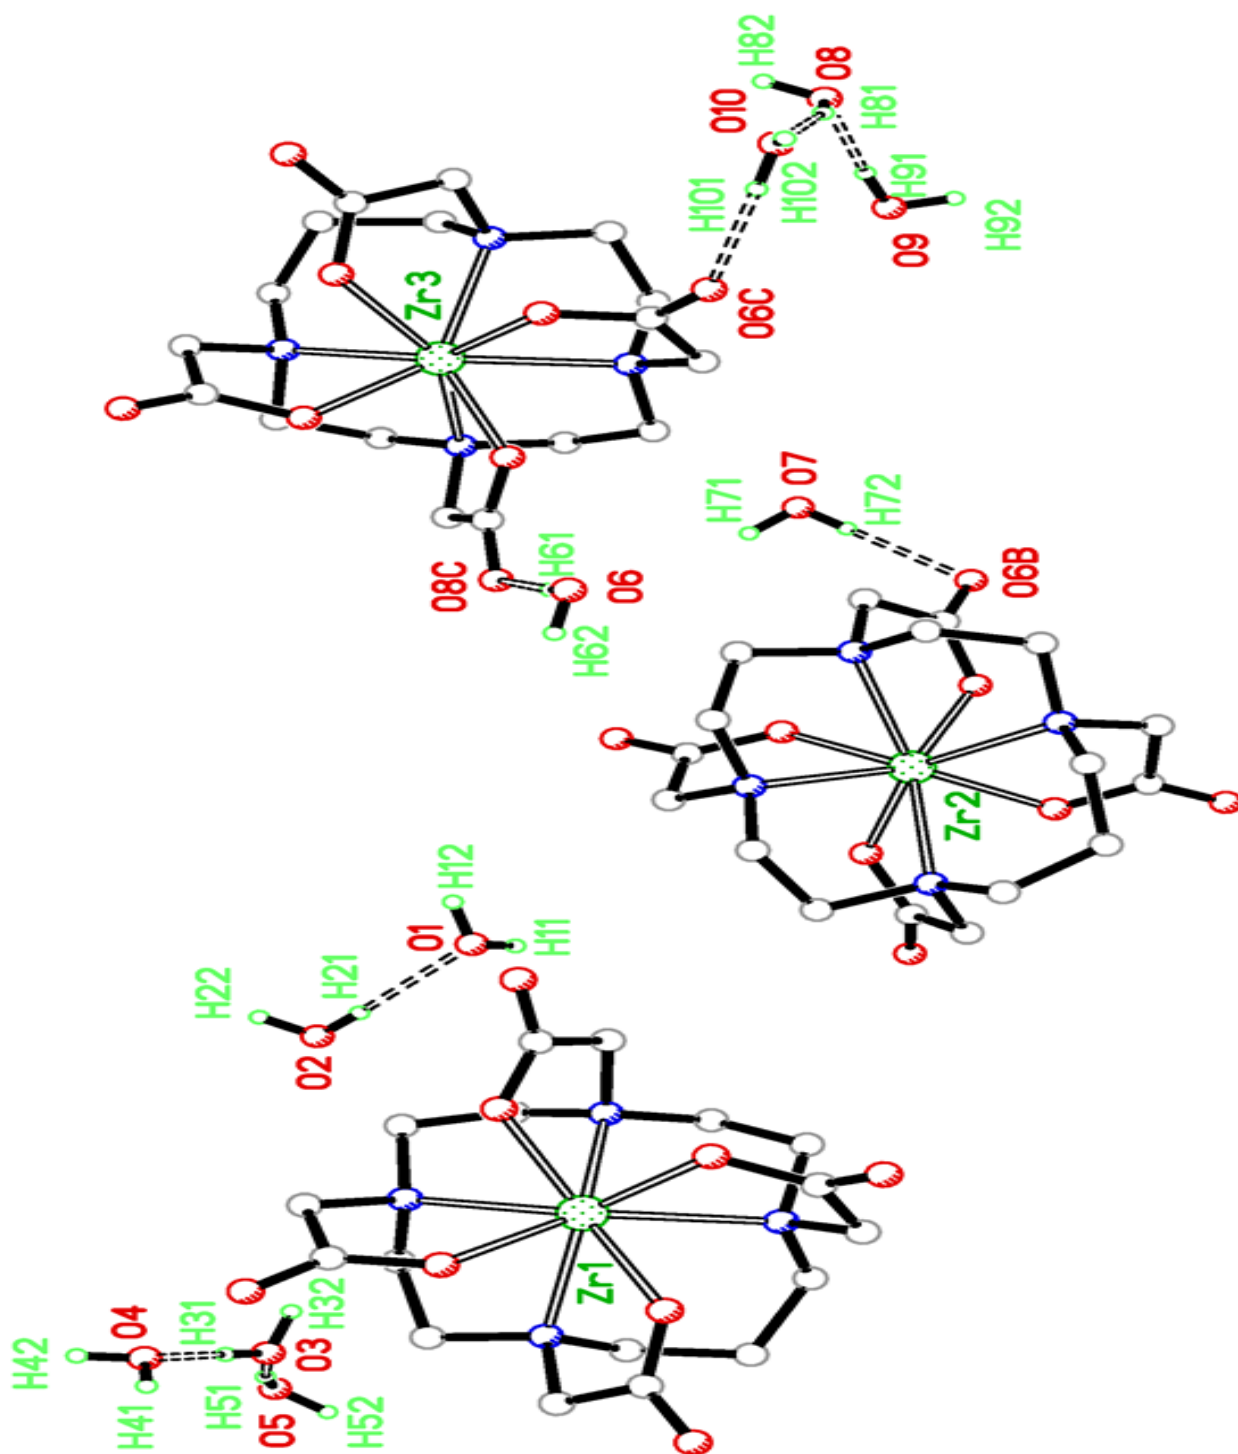

**Figure S26.** Plot showing the contents of the asymmetric unit for  $[\text{Zr}(\text{C}_{17}\text{H}_{26}\text{N}_4\text{O}_8)] \cdot 3.33 \text{H}_2\text{O}$  with all atoms represented by arbitrary-sized spheres. Ligand hydrogen atoms have been omitted and hydrogen-bonding interactions involving the lattice water molecules with the 3 independent  $[\text{Zr}(\text{C}_{17}\text{H}_{26}\text{N}_4\text{O}_8)]$  molecules are represented by dashed-open bonds.

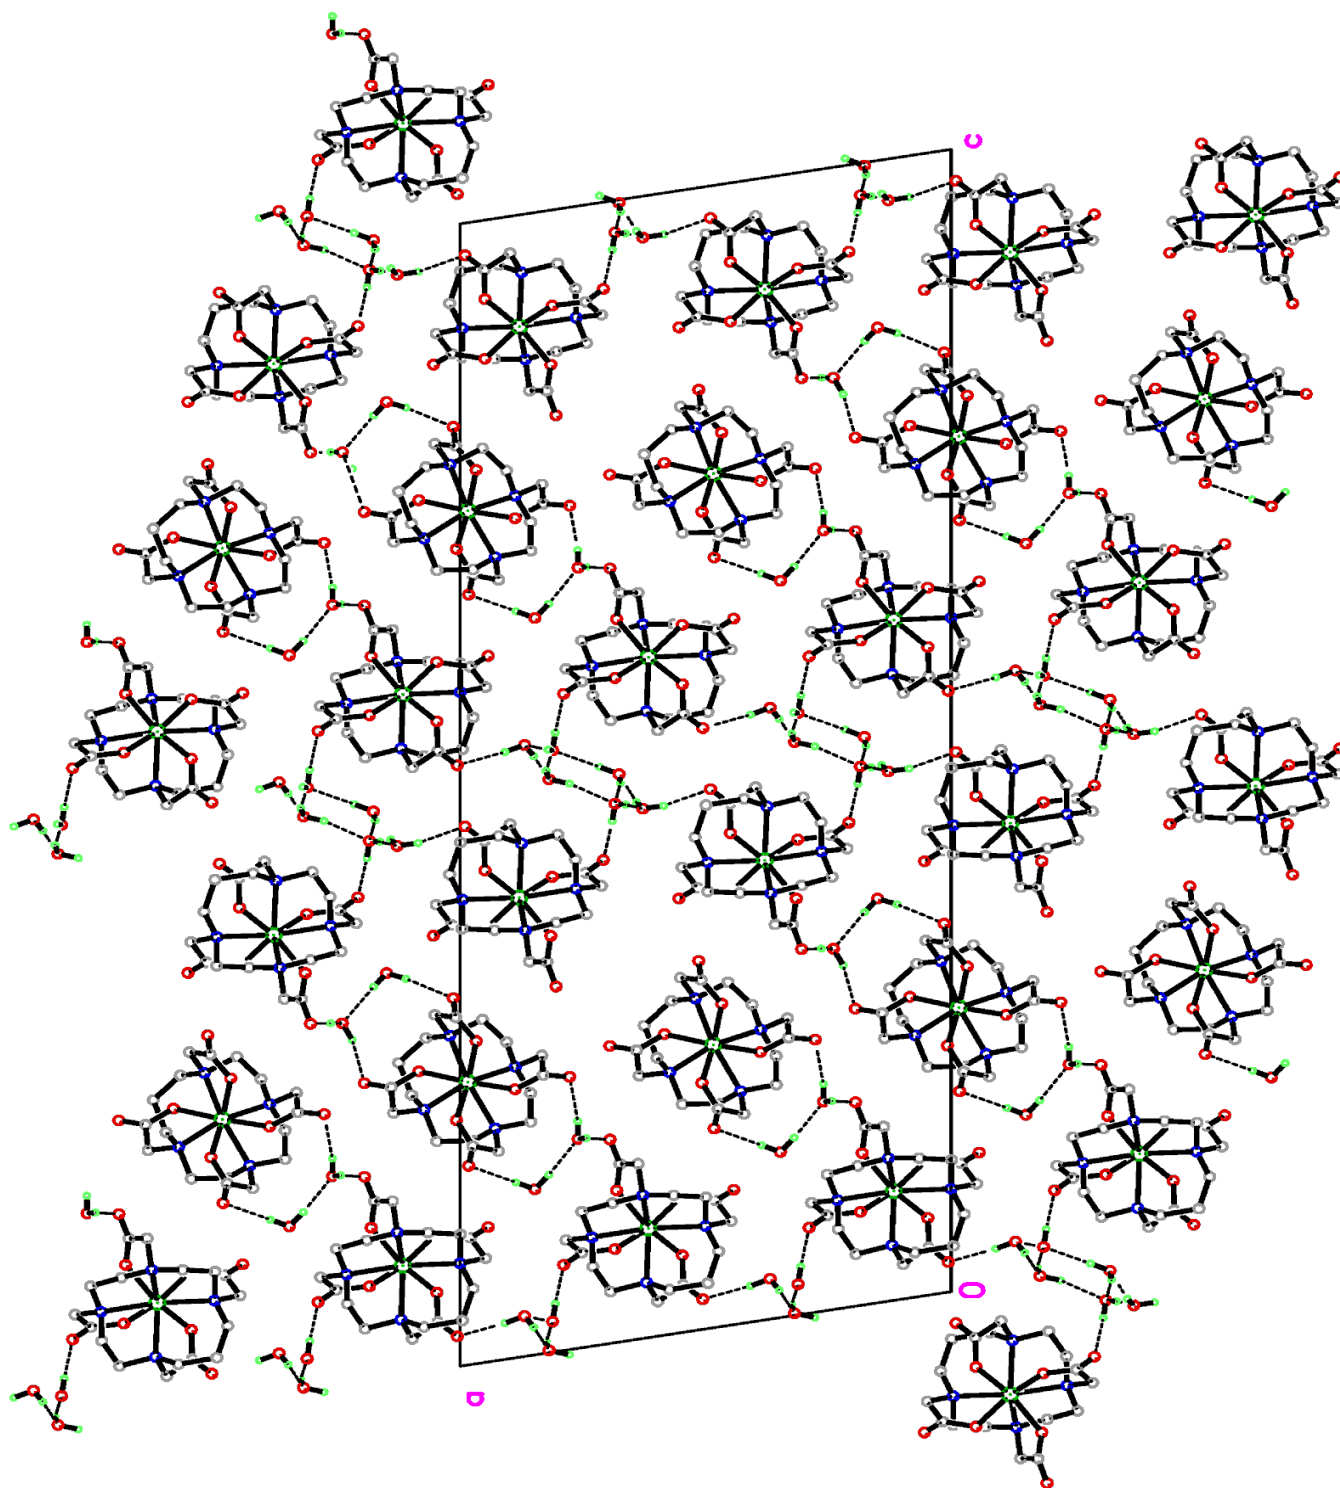

**Figure S27.** Packing plot of the solid-state structure of  $[\text{Zr}(\text{C}_{17}\text{H}_{26}\text{N}_4\text{O}_8)] \cdot 3.33 \text{H}_2\text{O}$  viewed in projection down the  $\bar{b}$  axis of the unit cell. All atoms are represented by dummy-sized spheres and ligand hydrogen atoms have been omitted for clarity. Hydrogen-bonding interactions involving the lattice water molecules are represented by dashed-solid bonds.

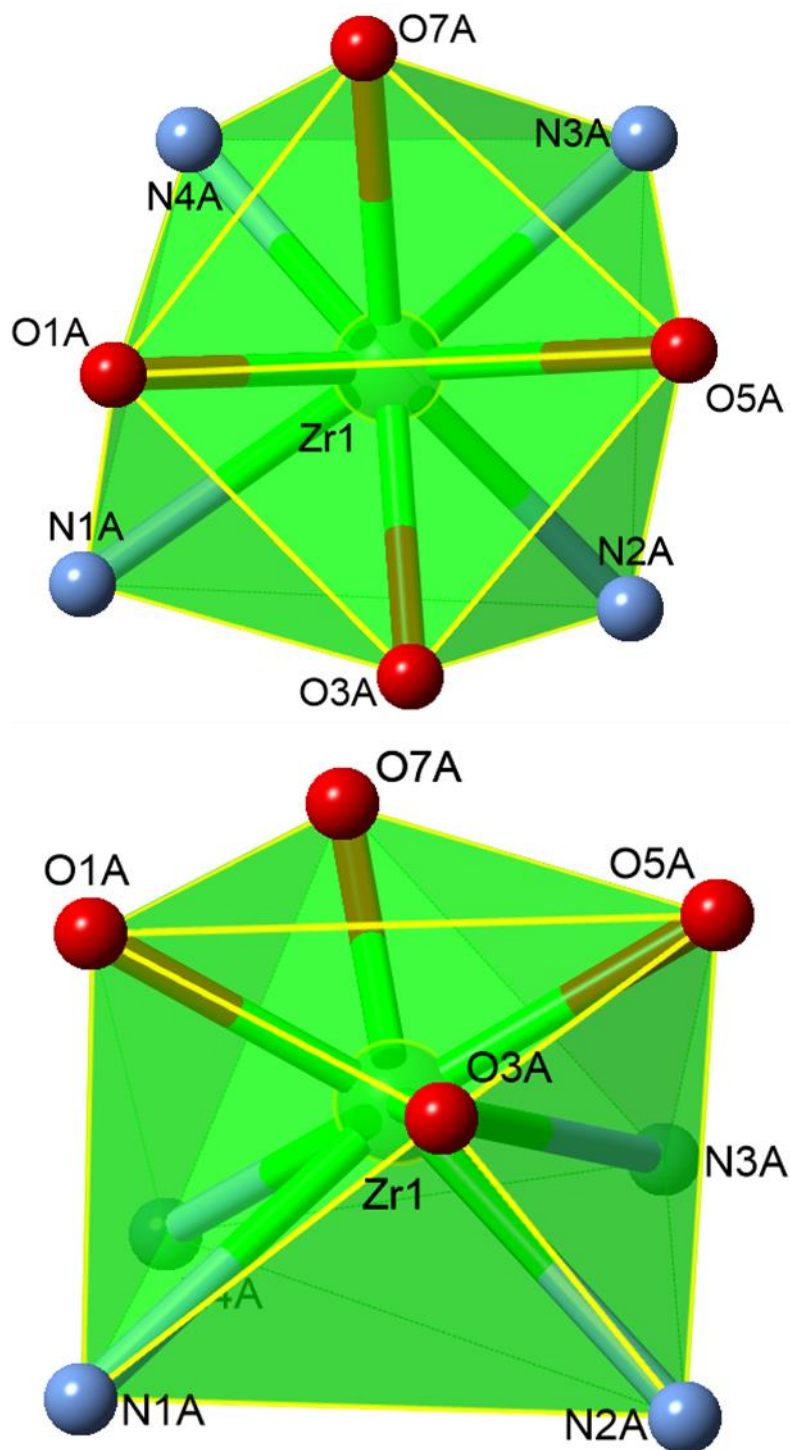

Figure S28. Molecule 1, top and side views showing the “distorted” square antiprism arrangement about Zr1.

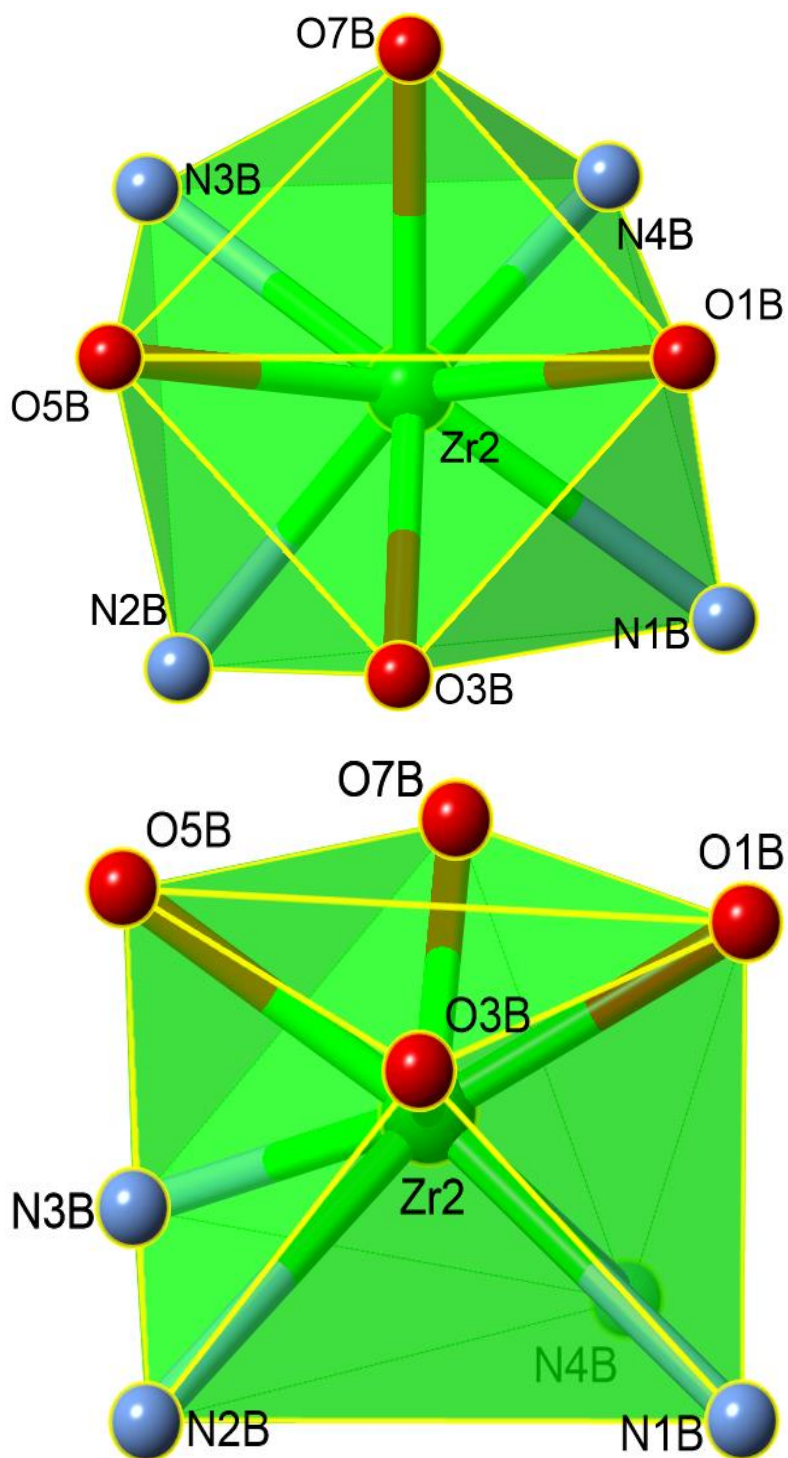

Figure S29. Molecule 2, top and side views showing the “distorted” square antiprism arrangement about Zr2.



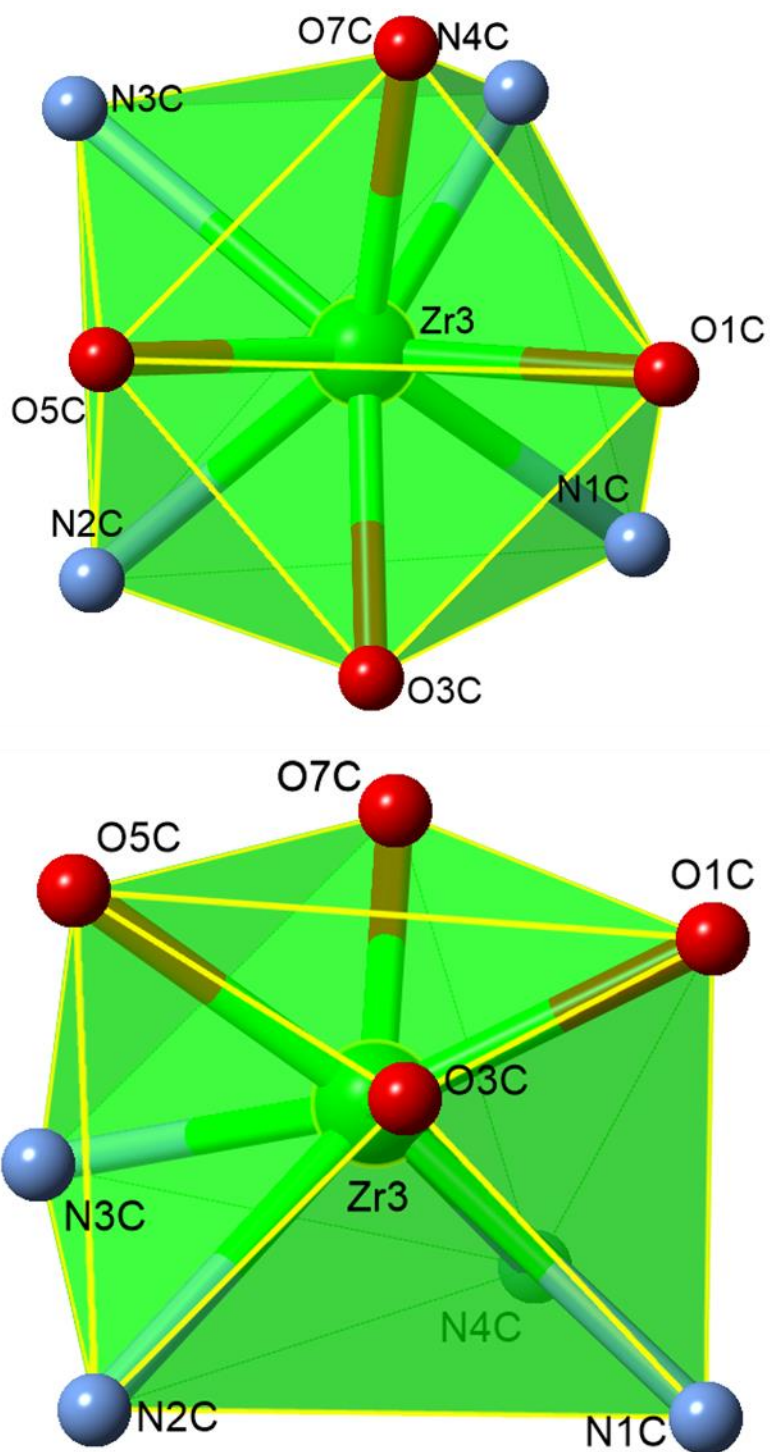

Figure S30. Molecule 3, top and side views showing the “distorted” square antiprism arrangement about Zr3.

**Table S1. Crystal structure data collection parameters****Crystal data**

|                                 |                                                         |
|---------------------------------|---------------------------------------------------------|
| $C_{17}H_{32.67}N_4O_{11.33}Zr$ | $F(000) = 3520$                                         |
| $M_r = 565.69$                  | $D_x = 1.706 \text{ Mg m}^{-3}$                         |
| Monoclinic, <i>Cc</i>           | Mo $K\alpha$ radiation, $\lambda = 0.71073 \text{ \AA}$ |
| $a = 19.2657 (17) \text{ \AA}$  | Cell parameters from 9909 reflections                   |
| $b = 6.9888 (6) \text{ \AA}$    | $\theta = 3.4\text{--}27.6^\circ$                       |
| $c = 49.787 (4) \text{ \AA}$    | $\mu = 0.57 \text{ mm}^{-1}$                            |
| $\beta = 99.7028 (11)^\circ$    | $T = 193 \text{ K}$                                     |
| $V = 6607.6 (10) \text{ \AA}^3$ | Needle, colourless                                      |
| $Z = 12$                        | $0.47 \times 0.04 \times 0.01 \text{ mm}$               |

**Data collection**

|                                                                                                                                                                                                                                                                                                                       |                                                                        |
|-----------------------------------------------------------------------------------------------------------------------------------------------------------------------------------------------------------------------------------------------------------------------------------------------------------------------|------------------------------------------------------------------------|
| Bruker APEX CCD diffractometer                                                                                                                                                                                                                                                                                        | 19202 independent reflections                                          |
| Radiation source: sealed x-ray tube                                                                                                                                                                                                                                                                                   | 16822 reflections with $I > 2\sigma(I)$                                |
| Graphite monochromator                                                                                                                                                                                                                                                                                                | $R_{\text{int}} = 0.059$                                               |
| $\phi$ and $\omega$ scans                                                                                                                                                                                                                                                                                             | $\theta_{\text{max}} = 30.1^\circ$ , $\theta_{\text{min}} = 3.4^\circ$ |
| Absorption correction: multi-scan Data were corrected for scaling and absorption effects using the multi-scan technique ( <i>SADABS</i> ). The ratio of minimum to maximum apparent transmission was 0.841. The calculated minimum and maximum transmission coefficients (based on crystal size) are 0.776 and 0.994. | $h = -27 \rightarrow 27$                                               |
| $T_{\text{min}} = 0.627$ , $T_{\text{max}} = 0.746$                                                                                                                                                                                                                                                                   | $k = -9 \rightarrow 9$                                                 |
| 61502 measured reflections                                                                                                                                                                                                                                                                                            | $l = -69 \rightarrow 69$                                               |

## Refinement

|                                                                |                                                                                                                                                   |
|----------------------------------------------------------------|---------------------------------------------------------------------------------------------------------------------------------------------------|
| Refinement on $F^2$                                            | Secondary atom site location: difference Fourier map                                                                                              |
| Least-squares matrix: full                                     | Hydrogen site location: mixed                                                                                                                     |
| $R[F^2 > 2\sigma(F^2)] = 0.040$                                | H atoms treated by a mixture of independent and constrained refinement                                                                            |
| $wR(F^2) = 0.079$                                              | $w = 1/[\sigma^2(F_o^2) + (0.0304P)^2]$<br>where $P = (F_o^2 + 2F_c^2)/3$                                                                         |
| $S = 1.00$                                                     | $(\Delta/\sigma)_{\max} = 0.003$                                                                                                                  |
| 19202 reflections                                              | $\Delta_{\max} = 0.55 \text{ e } \text{\AA}^{-3}$                                                                                                 |
| 981 parameters                                                 | $\Delta_{\min} = -0.62 \text{ e } \text{\AA}^{-3}$                                                                                                |
| 32 restraints                                                  | Absolute structure: Flack x determined using 6966 quotients $[(I+)-(I-)]/[(I+)+(I-)]$ (Parsons, Flack and Wagner, Acta Cryst. B69 (2013) 249-259) |
| Primary atom site location: structure-invariant direct methods | Absolute structure parameter: 0.016 (16)                                                                                                          |

## Special details

*Geometry.* All esds (except the esd in the dihedral angle between two l.s. planes) are estimated using the full covariance matrix. The cell esds are taken into account individually in the estimation of esds in distances, angles and torsion angles; correlations between esds in cell parameters are only used when they are defined by crystal symmetry. An approximate (isotropic) treatment of cell esds is used for estimating esds involving l.s. planes.



**Table S2. Fractional atomic coordinates and isotropic or equivalent isotropic displacement parameters (Å<sup>2</sup>)**

|     | x            | y           | z           | $U_{iso}^*/U_{eq}$ |
|-----|--------------|-------------|-------------|--------------------|
| Zr1 | 0.87976 (2)  | 1.48693 (5) | 0.90232 (2) | 0.01309 (8)        |
| O1A | 0.94954 (16) | 1.6045 (4)  | 0.87864 (6) | 0.0184 (6)         |
| O2A | 1.05440 (18) | 1.7422 (4)  | 0.88036 (7) | 0.0288 (8)         |
| O3A | 0.94959 (16) | 1.6617 (4)  | 0.93078 (6) | 0.0193 (6)         |
| O4A | 0.99029 (18) | 1.7775 (5)  | 0.97191 (7) | 0.0293 (8)         |
| O5A | 0.81246 (16) | 1.6897 (4)  | 0.91621 (6) | 0.0195 (6)         |
| O6A | 0.70833 (18) | 1.7928 (5)  | 0.92409 (7) | 0.0298 (8)         |
| O7A | 0.81553 (16) | 1.5623 (4)  | 0.86471 (6) | 0.0198 (6)         |
| O8A | 0.8047 (3)   | 1.5478 (6)  | 0.81969 (8) | 0.0492 (12)        |
| N1A | 0.99584 (19) | 1.3074 (5)  | 0.90816 (7) | 0.0167 (7)         |
| N2A | 0.87506 (19) | 1.3835 (5)  | 0.94934 (7) | 0.0164 (7)         |
| N3A | 0.76393 (19) | 1.3369 (5)  | 0.90257 (7) | 0.0169 (7)         |
| N4A | 0.86712 (19) | 1.2041 (5)  | 0.87279 (7) | 0.0169 (7)         |
| C1A | 1.0215 (2)   | 1.1799 (6)  | 0.93188 (9) | 0.0218 (9)         |
| H1A | 1.0736       | 1.1759      | 0.9346      | 0.026*             |
| H1B | 1.0042       | 1.0486      | 0.9273      | 0.026*             |
| C2A | 0.9994 (2)   | 1.2385 (6)  | 0.95851 (9) | 0.0217 (9)         |
| H2A | 1.0262       | 1.1613      | 0.9734      | 0.026*             |
| H2B | 1.0122       | 1.3743      | 0.9622      | 0.026*             |
| C3A | 0.9217 (2)   | 1.2142 (6)  | 0.95891 (9) | 0.0231 (10)        |
| H3A | 0.9157       | 1.1832      | 0.9778      | 0.028*             |
| H3B | 0.9048       | 1.1028      | 0.9474      | 0.028*             |
| C4A | 0.8013 (2)   | 1.3337 (6)  | 0.95242 (9) | 0.0206 (9)         |
| H4A | 0.7747       | 1.4524      | 0.9545      | 0.025*             |
| H4B | 0.8021       | 1.2556      | 0.9691      | 0.025*             |
| C5A | 0.7651 (2)   | 1.2244 (7)  | 0.92816 (9) | 0.0215 (9)         |
| H5A | 0.7900       | 1.1018      | 0.9268      | 0.026*             |

|      |            |            |              |             |
|------|------------|------------|--------------|-------------|
| H5B  | 0.7163     | 1.1948     | 0.9305       | 0.026*      |
| C6A  | 0.7427 (2) | 1.2061 (7) | 0.87889 (9)  | 0.0220 (9)  |
| H6A  | 0.7030     | 1.1243     | 0.8821       | 0.026*      |
| H6B  | 0.7273     | 1.2818     | 0.8621       | 0.026*      |
| C7A  | 0.8044 (3) | 1.0849 (6) | 0.87558 (10) | 0.0230 (10) |
| H7A  | 0.7919     | 1.0035     | 0.8592       | 0.028*      |
| H7B  | 0.8161     | 0.9998     | 0.8916       | 0.028*      |
| C8A  | 0.9300 (3) | 1.0753 (6) | 0.87712 (9)  | 0.0219 (10) |
| H8A  | 0.9275     | 0.9886     | 0.8926       | 0.026*      |
| H8B  | 0.9304     | 0.9960     | 0.8607       | 0.026*      |
| C9A  | 0.9959 (2) | 1.1913 (6) | 0.88279 (9)  | 0.0205 (9)  |
| H9A  | 0.9987     | 1.2774     | 0.8672       | 0.025*      |
| H9B  | 1.0374     | 1.1057     | 0.8852       | 0.025*      |
| C10A | 1.0485 (2) | 1.4633 (6) | 0.90717 (10) | 0.0206 (10) |
| H10A | 1.0912     | 1.4099     | 0.9013       | 0.025*      |
| H10B | 1.0624     | 1.5194     | 0.9256       | 0.025*      |
| C11A | 1.0172 (2) | 1.6172 (6) | 0.88738 (9)  | 0.0200 (9)  |
| C12A | 0.8985 (3) | 1.5472 (7) | 0.96777 (9)  | 0.0209 (10) |
| H12A | 0.9202     | 1.4976     | 0.9859       | 0.025*      |
| H12B | 0.8570     | 1.6249     | 0.9702       | 0.025*      |
| C13A | 0.9508 (2) | 1.6722 (6) | 0.95666 (8)  | 0.0182 (8)  |
| C14A | 0.7121 (3) | 1.4947 (6) | 0.90166 (10) | 0.0209 (10) |
| H14A | 0.6729     | 1.4531     | 0.9108       | 0.025*      |
| H14B | 0.6923     | 1.5237     | 0.8824       | 0.025*      |
| C15A | 0.7445 (2) | 1.6723 (6) | 0.91518 (9)  | 0.0193 (9)  |
| C16A | 0.8585 (3) | 1.2848 (7) | 0.84484 (9)  | 0.0229 (10) |
| H16A | 0.8299     | 1.1954     | 0.8321       | 0.028*      |
| H16B | 0.9054     | 1.2956     | 0.8393       | 0.028*      |
| C17A | 0.8234 (3) | 1.4800 (7) | 0.84240 (10) | 0.0253 (11) |

|     |              |             |              |             |
|-----|--------------|-------------|--------------|-------------|
| Zr2 | 0.98417 (2)  | 0.64557 (5) | 0.74773 (2)  | 0.01392 (9) |
| O1B | 0.96739 (17) | 0.4937 (4)  | 0.78253 (6)  | 0.0221 (7)  |
| O2B | 1.01413 (19) | 0.3776 (5)  | 0.82316 (7)  | 0.0298 (8)  |
| O3B | 1.08407 (16) | 0.5300 (4)  | 0.76364 (6)  | 0.0207 (7)  |
| O4B | 1.1952 (2)   | 0.4663 (6)  | 0.76049 (8)  | 0.0435 (10) |
| O5B | 1.00764 (17) | 0.4699 (4)  | 0.71588 (6)  | 0.0200 (6)  |
| O6B | 0.98271 (18) | 0.3468 (5)  | 0.67429 (6)  | 0.0275 (8)  |
| O7B | 0.88833 (16) | 0.4978 (4)  | 0.73509 (6)  | 0.0208 (6)  |
| O8B | 0.7769 (2)   | 0.4490 (6)  | 0.73879 (9)  | 0.0455 (11) |
| N1B | 1.0211 (2)   | 0.8346 (6)  | 0.79070 (8)  | 0.0263 (9)  |
| N2B | 1.0737 (2)   | 0.8271 (6)  | 0.72934 (8)  | 0.0243 (8)  |
| N3B | 0.9286 (2)   | 0.7841 (5)  | 0.70354 (7)  | 0.0235 (8)  |
| N4B | 0.8879 (2)   | 0.8596 (6)  | 0.75476 (8)  | 0.0260 (9)  |
| C1B | 1.0698 (3)   | 1.0021 (7)  | 0.79180 (10) | 0.0340 (12) |
| H1C | 1.0938       | 1.0188      | 0.8109       | 0.041*      |
| H1D | 1.0413       | 1.1184      | 0.7867       | 0.041*      |
| C2B | 1.1250 (3)   | 0.9882 (8)  | 0.77382 (12) | 0.0341 (13) |
| H2C | 1.1606       | 1.0891      | 0.7794       | 0.041*      |
| H2D | 1.1490       | 0.8632      | 0.7772       | 0.041*      |
| C3B | 1.0991 (3)   | 1.0069 (7)  | 0.74395 (11) | 0.0317 (11) |
| H3C | 1.0602       | 1.1010      | 0.7412       | 0.038*      |
| H3D | 1.1377       | 1.0598      | 0.7354       | 0.038*      |
| C4B | 1.0474 (3)   | 0.8777 (7)  | 0.69983 (9)  | 0.0291 (11) |
| H4C | 1.0768       | 0.9819      | 0.6942       | 0.035*      |
| H4D | 1.0521       | 0.7649      | 0.6882       | 0.035*      |
| C5B | 0.9737 (3)   | 0.9388 (7)  | 0.69571 (10) | 0.0303 (11) |
| H5C | 0.9580       | 0.9726      | 0.6763       | 0.036*      |
| H5D | 0.9691       | 1.0540      | 0.7068       | 0.036*      |
| C6B | 0.8564 (3)   | 0.8633 (7)  | 0.70449 (10) | 0.0295 (11) |

|      |              |             |              |             |
|------|--------------|-------------|--------------|-------------|
| H6C  | 0.8416       | 0.9473      | 0.6885       | 0.035*      |
| H6D  | 0.8221       | 0.7569      | 0.7036       | 0.035*      |
| C7B  | 0.8566 (3)   | 0.9730 (7)  | 0.72973 (12) | 0.0315 (12) |
| H7C  | 0.8077       | 1.0097      | 0.7311       | 0.038*      |
| H7D  | 0.8841       | 1.0919      | 0.7290       | 0.038*      |
| C8B  | 0.9057 (3)   | 0.9970 (7)  | 0.77784 (10) | 0.0322 (11) |
| H8C  | 0.9282       | 1.1123      | 0.7716       | 0.039*      |
| H8D  | 0.8622       | 1.0372      | 0.7844       | 0.039*      |
| C9B  | 0.9547 (3)   | 0.9048 (7)  | 0.80055 (10) | 0.0320 (12) |
| H9C  | 0.9308       | 0.7954      | 0.8077       | 0.038*      |
| H9D  | 0.9677       | 0.9981      | 0.8155       | 0.038*      |
| C10B | 1.0516 (3)   | 0.6865 (7)  | 0.81084 (9)  | 0.0276 (11) |
| H10C | 1.0510       | 0.7337      | 0.8296       | 0.033*      |
| H10D | 1.1011       | 0.6615      | 0.8090       | 0.033*      |
| C11B | 1.0094 (3)   | 0.5024 (7)  | 0.80616 (9)  | 0.0205 (9)  |
| C12B | 1.1355 (2)   | 0.6962 (7)  | 0.73046 (10) | 0.0263 (10) |
| H12C | 1.1317       | 0.6266      | 0.7130       | 0.032*      |
| H12D | 1.1792       | 0.7734      | 0.7328       | 0.032*      |
| C13B | 1.1408 (3)   | 0.5543 (7)  | 0.75321 (10) | 0.0245 (10) |
| C14B | 0.9220 (3)   | 0.6292 (7)  | 0.68324 (10) | 0.0245 (10) |
| H14C | 0.9286       | 0.6831      | 0.6655       | 0.029*      |
| H14D | 0.8738       | 0.5756      | 0.6810       | 0.029*      |
| C15B | 0.9744 (3)   | 0.4704 (6)  | 0.69093 (9)  | 0.0201 (9)  |
| C16B | 0.8336 (3)   | 0.7192 (7)  | 0.76119 (10) | 0.0270 (10) |
| H16C | 0.8449       | 0.6829      | 0.7807       | 0.032*      |
| H16D | 0.7867       | 0.7812      | 0.7581       | 0.032*      |
| C17B | 0.8309 (3)   | 0.5423 (7)  | 0.74395 (10) | 0.0242 (10) |
| Zr3  | 0.61650 (2)  | 0.93584 (5) | 0.59569 (2)  | 0.01259 (8) |
| O1C  | 0.54787 (16) | 1.0550 (4)  | 0.61947 (6)  | 0.0167 (6)  |

|     |              |            |             |             |
|-----|--------------|------------|-------------|-------------|
| O2C | 0.44296 (18) | 1.1945 (5) | 0.61812 (7) | 0.0270 (7)  |
| O3C | 0.54762 (15) | 1.1125 (4) | 0.56761 (6) | 0.0169 (6)  |
| O4C | 0.50589 (18) | 1.2283 (5) | 0.52644 (6) | 0.0286 (8)  |
| O5C | 0.68470 (15) | 1.1367 (4) | 0.58198 (6) | 0.0179 (6)  |
| O6C | 0.78919 (17) | 1.2398 (5) | 0.57495 (7) | 0.0288 (8)  |
| O7C | 0.68136 (16) | 1.0100 (4) | 0.63314 (6) | 0.0184 (6)  |
| O8C | 0.6949 (2)   | 0.9930 (5) | 0.67855 (7) | 0.0348 (9)  |
| N1C | 0.50009 (19) | 0.7586 (5) | 0.59010 (7) | 0.0157 (7)  |
| N2C | 0.62043 (19) | 0.8311 (5) | 0.54863 (7) | 0.0168 (7)  |
| N3C | 0.73157 (19) | 0.7827 (5) | 0.59534 (7) | 0.0161 (7)  |
| N4C | 0.62806 (18) | 0.6534 (5) | 0.62530 (7) | 0.0160 (7)  |
| C1C | 0.4736 (2)   | 0.6320 (6) | 0.56630 (9) | 0.0205 (9)  |
| H1E | 0.4215       | 0.6293     | 0.5637      | 0.025*      |
| H1F | 0.4906       | 0.5002     | 0.5708      | 0.025*      |
| C2C | 0.4955 (2)   | 0.6900 (6) | 0.53974 (9) | 0.0202 (9)  |
| H2E | 0.4833       | 0.8264     | 0.5362      | 0.024*      |
| H2F | 0.4681       | 0.6140     | 0.5248      | 0.024*      |
| C3C | 0.5738 (2)   | 0.6626 (6) | 0.53914 (9) | 0.0209 (9)  |
| H3E | 0.5906       | 0.5510     | 0.5507      | 0.025*      |
| H3F | 0.5795       | 0.6313     | 0.5202      | 0.025*      |
| C4C | 0.6939 (2)   | 0.7806 (6) | 0.54540 (9) | 0.0197 (9)  |
| H4E | 0.7207       | 0.8990     | 0.5434      | 0.024*      |
| H4F | 0.6928       | 0.7030     | 0.5287      | 0.024*      |
| C5C | 0.7298 (2)   | 0.6699 (6) | 0.56963 (9) | 0.0206 (9)  |
| H5E | 0.7044       | 0.5481     | 0.5710      | 0.025*      |
| H5F | 0.7785       | 0.6389     | 0.5672      | 0.025*      |
| C6C | 0.7524 (3)   | 0.6525 (7) | 0.61911 (9) | 0.0217 (10) |
| H6E | 0.7682       | 0.7286     | 0.6358      | 0.026*      |
| H6F | 0.7919       | 0.5695     | 0.6159      | 0.026*      |

|      |            |            |              |             |
|------|------------|------------|--------------|-------------|
| C7C  | 0.6900 (3) | 0.5321 (6) | 0.62260 (10) | 0.0219 (10) |
| H7E  | 0.6779     | 0.4464     | 0.6067       | 0.026*      |
| H7F  | 0.7022     | 0.4513     | 0.6390       | 0.026*      |
| C8C  | 0.5651 (3) | 0.5270 (6) | 0.62123 (10) | 0.0204 (9)  |
| H8E  | 0.5645     | 0.4493     | 0.6378       | 0.024*      |
| H8F  | 0.5673     | 0.4386     | 0.6058       | 0.024*      |
| C9C  | 0.4995 (2) | 0.6441 (6) | 0.61536 (9)  | 0.0182 (9)  |
| H9E  | 0.4578     | 0.5592     | 0.6129       | 0.022*      |
| H9F  | 0.4967     | 0.7308     | 0.6309       | 0.022*      |
| C10C | 0.4482 (2) | 0.9165 (7) | 0.59114 (9)  | 0.0198 (9)  |
| H10E | 0.4052     | 0.8642     | 0.5968       | 0.024*      |
| H10F | 0.4349     | 0.9731     | 0.5728       | 0.024*      |
| C11C | 0.4794 (2) | 1.0698 (6) | 0.61101 (9)  | 0.0177 (9)  |
| C12C | 0.5976 (3) | 0.9977 (7) | 0.53042 (9)  | 0.0204 (10) |
| H12E | 0.5759     | 0.9502     | 0.5122       | 0.024*      |
| H12F | 0.6394     | 1.0749     | 0.5282       | 0.024*      |
| C13C | 0.5455 (2) | 1.1226 (6) | 0.54166 (9)  | 0.0199 (9)  |
| C14C | 0.7844 (2) | 0.9378 (6) | 0.59640 (10) | 0.0193 (9)  |
| H14E | 0.8230     | 0.8951     | 0.5870       | 0.023*      |
| H14F | 0.8048     | 0.9644     | 0.6156       | 0.023*      |
| C15C | 0.7525 (2) | 1.1189 (6) | 0.58320 (9)  | 0.0194 (9)  |
| C16C | 0.6378 (3) | 0.7361 (7) | 0.65354 (9)  | 0.0203 (9)  |
| H16E | 0.6655     | 0.6452     | 0.6664       | 0.024*      |
| H16F | 0.5910     | 0.7508     | 0.6591       | 0.024*      |
| C17C | 0.6746 (3) | 0.9275 (7) | 0.65582 (10) | 0.0210 (10) |
| O1   | 0.7400 (3) | 0.9006 (6) | 0.81582 (8)  | 0.0454 (10) |
| H11  | 0.764 (2)  | 0.803 (5)  | 0.8175 (9)   | 0.024 (14)* |
| H12  | 0.720 (3)  | 0.897 (8)  | 0.8000 (6)   | 0.06 (2)*   |
| O2   | 0.6500 (3) | 0.7903 (8) | 0.85387 (10) | 0.0560 (12) |

|      |             |            |              |             |
|------|-------------|------------|--------------|-------------|
| H21  | 0.676 (2)   | 0.834 (9)  | 0.8438 (11)  | 0.06 (2)*   |
| H22  | 0.6105 (13) | 0.825 (10) | 0.8464 (11)  | 0.06 (2)*   |
| O3   | 0.6848 (2)  | 0.9531 (6) | 0.97189 (8)  | 0.0348 (9)  |
| H31  | 0.663 (4)   | 1.054 (6)  | 0.9696 (11)  | 0.07 (3)*   |
| H32  | 0.690 (3)   | 0.912 (6)  | 0.9571 (5)   | 0.022 (13)* |
| O4   | 0.6282 (2)  | 1.3038 (6) | 0.96380 (9)  | 0.0393 (9)  |
| H41  | 0.641 (3)   | 1.408 (6)  | 0.9704 (17)  | 0.10 (3)*   |
| H42  | 0.5855 (9)  | 1.304 (8)  | 0.9636 (12)  | 0.039 (18)* |
| O5   | 0.6766 (2)  | 0.6024 (6) | 0.99721 (10) | 0.0462 (11) |
| H51  | 0.674 (2)   | 0.705 (4)  | 0.9893 (8)   | 0.016 (12)* |
| H52  | 0.7162 (17) | 0.597 (9)  | 1.0061 (13)  | 0.07 (3)*   |
| O6   | 0.7598 (2)  | 1.3433 (6) | 0.68332 (8)  | 0.0446 (10) |
| H61  | 0.743 (3)   | 1.236 (4)  | 0.6829 (11)  | 0.05 (2)*   |
| H62  | 0.760 (4)   | 1.383 (8)  | 0.6987 (6)   | 0.06 (2)*   |
| O7   | 0.8479 (3)  | 0.2243 (8) | 0.64502 (10) | 0.0533 (12) |
| H71  | 0.820 (2)   | 0.235 (12) | 0.6557 (11)  | 0.08 (3)*   |
| H72  | 0.8863 (15) | 0.258 (9)  | 0.6535 (10)  | 0.049 (19)* |
| O8   | 0.8191 (3)  | 1.0465 (6) | 0.50202 (10) | 0.0473 (11) |
| H81  | 0.825 (3)   | 1.149 (5)  | 0.5097 (12)  | 0.06 (2)*   |
| H82  | 0.7775 (12) | 1.038 (8)  | 0.4955 (13)  | 0.05 (2)*   |
| O9   | 0.8689 (2)  | 0.7518 (6) | 0.53532 (9)  | 0.0382 (9)  |
| H91  | 0.850 (2)   | 0.832 (6)  | 0.5242 (8)   | 0.027 (15)* |
| H92  | 0.9090 (14) | 0.747 (9)  | 0.5317 (12)  | 0.06 (2)*   |
| O10  | 0.8118 (2)  | 1.3998 (5) | 0.52682 (7)  | 0.0332 (8)  |
| H101 | 0.806 (3)   | 1.365 (6)  | 0.5419 (5)   | 0.025 (14)* |
| H102 | 0.821 (4)   | 1.514 (3)  | 0.5279 (11)  | 0.06 (2)*   |

**Table S3. Atomic displacement parameters (Å<sup>2</sup>)**

|      | $U^{11}$     | $U^{22}$     | $U^{33}$     | $U^{12}$     | $U^{13}$     | $U^{23}$     |
|------|--------------|--------------|--------------|--------------|--------------|--------------|
| Zr1  | 0.01429 (19) | 0.01012 (17) | 0.01510 (17) | 0.00042 (16) | 0.00320 (13) | 0.00088 (14) |
| O1A  | 0.0184 (16)  | 0.0182 (15)  | 0.0195 (15)  | 0.0010 (13)  | 0.0056 (12)  | 0.0039 (11)  |
| O2A  | 0.0273 (19)  | 0.0212 (17)  | 0.041 (2)    | -0.0034 (14) | 0.0142 (15)  | 0.0066 (14)  |
| O3A  | 0.0186 (16)  | 0.0187 (15)  | 0.0209 (15)  | -0.0042 (12) | 0.0043 (12)  | -0.0034 (11) |
| O4A  | 0.0305 (19)  | 0.0296 (18)  | 0.0268 (17)  | -0.0100 (15) | 0.0017 (14)  | -0.0098 (14) |
| O5A  | 0.0201 (16)  | 0.0140 (15)  | 0.0256 (16)  | -0.0004 (12) | 0.0074 (13)  | 0.0004 (11)  |
| O6A  | 0.0232 (18)  | 0.0229 (17)  | 0.044 (2)    | 0.0053 (14)  | 0.0084 (15)  | -0.0059 (15) |
| O7A  | 0.0219 (17)  | 0.0189 (16)  | 0.0180 (15)  | 0.0038 (13)  | 0.0017 (12)  | 0.0029 (11)  |
| O8A  | 0.076 (3)    | 0.048 (3)    | 0.022 (2)    | 0.032 (2)    | 0.006 (2)    | 0.0100 (16)  |
| N1A  | 0.0172 (19)  | 0.0159 (17)  | 0.0170 (17)  | 0.0038 (15)  | 0.0032 (14)  | 0.0009 (13)  |
| N2A  | 0.0190 (19)  | 0.0139 (17)  | 0.0162 (17)  | -0.0009 (14) | 0.0029 (14)  | 0.0002 (13)  |
| N3A  | 0.0177 (19)  | 0.0131 (17)  | 0.0196 (18)  | -0.0029 (14) | 0.0026 (14)  | -0.0021 (13) |
| N4A  | 0.0192 (19)  | 0.0139 (16)  | 0.0176 (17)  | 0.0006 (14)  | 0.0032 (14)  | 0.0007 (13)  |
| C1A  | 0.022 (2)    | 0.017 (2)    | 0.026 (2)    | 0.0047 (18)  | 0.0008 (18)  | 0.0058 (17)  |
| C2A  | 0.025 (2)    | 0.020 (2)    | 0.018 (2)    | 0.0041 (18)  | 0.0014 (17)  | 0.0052 (16)  |
| C3A  | 0.026 (3)    | 0.016 (2)    | 0.026 (2)    | 0.0032 (19)  | 0.0037 (19)  | 0.0064 (17)  |
| C4A  | 0.020 (2)    | 0.022 (2)    | 0.021 (2)    | -0.0014 (18) | 0.0077 (17)  | 0.0021 (16)  |
| C5A  | 0.019 (2)    | 0.020 (2)    | 0.028 (2)    | -0.0045 (18) | 0.0080 (18)  | 0.0032 (17)  |
| C6A  | 0.018 (2)    | 0.021 (2)    | 0.027 (2)    | -0.0059 (19) | 0.0025 (18)  | -0.0034 (18) |
| C7A  | 0.028 (3)    | 0.014 (2)    | 0.028 (2)    | -0.0034 (18) | 0.0045 (19)  | -0.0065 (17) |
| C8A  | 0.032 (3)    | 0.0102 (19)  | 0.024 (2)    | 0.0071 (18)  | 0.0064 (19)  | -0.0013 (16) |
| C9A  | 0.025 (2)    | 0.017 (2)    | 0.020 (2)    | 0.0084 (18)  | 0.0070 (18)  | -0.0007 (16) |
| C10A | 0.014 (2)    | 0.020 (2)    | 0.028 (3)    | 0.0024 (18)  | 0.0050 (18)  | 0.0034 (17)  |
| C11A | 0.021 (2)    | 0.018 (2)    | 0.023 (2)    | 0.0012 (18)  | 0.0077 (17)  | -0.0022 (16) |
| C12A | 0.022 (3)    | 0.021 (2)    | 0.019 (2)    | -0.0022 (19) | 0.0024 (18)  | -0.0051 (16) |
| C13A | 0.020 (2)    | 0.015 (2)    | 0.019 (2)    | 0.0024 (17)  | 0.0028 (16)  | -0.0021 (15) |
| C14A | 0.016 (2)    | 0.018 (2)    | 0.029 (3)    | 0.0010 (18)  | 0.0033 (19)  | 0.0004 (17)  |



|      |             |              |              |              |              |              |
|------|-------------|--------------|--------------|--------------|--------------|--------------|
| C15A | 0.020 (2)   | 0.018 (2)    | 0.019 (2)    | 0.0019 (18)  | 0.0027 (17)  | 0.0045 (16)  |
| C16A | 0.025 (3)   | 0.026 (2)    | 0.018 (2)    | 0.005 (2)    | 0.0038 (18)  | -0.0001 (18) |
| C17A | 0.025 (3)   | 0.029 (3)    | 0.021 (2)    | 0.006 (2)    | 0.002 (2)    | 0.0043 (18)  |
| Zr2  | 0.0160 (2)  | 0.01155 (18) | 0.01501 (16) | 0.00001 (16) | 0.00493 (15) | 0.00014 (14) |
| O1B  | 0.0272 (18) | 0.0213 (16)  | 0.0184 (15)  | -0.0036 (13) | 0.0052 (13)  | 0.0018 (12)  |
| O2B  | 0.035 (2)   | 0.0315 (19)  | 0.0236 (18)  | 0.0058 (15)  | 0.0056 (15)  | 0.0091 (14)  |
| O3B  | 0.0205 (17) | 0.0223 (16)  | 0.0186 (15)  | 0.0022 (13)  | 0.0012 (12)  | 0.0021 (11)  |
| O4B  | 0.024 (2)   | 0.066 (3)    | 0.042 (2)    | 0.0227 (19)  | 0.0099 (17)  | 0.0174 (19)  |
| O5B  | 0.0247 (17) | 0.0168 (15)  | 0.0178 (15)  | 0.0022 (13)  | 0.0020 (12)  | -0.0018 (11) |
| O6B  | 0.036 (2)   | 0.0272 (18)  | 0.0201 (16)  | -0.0007 (15) | 0.0070 (14)  | -0.0042 (13) |
| O7B  | 0.0190 (17) | 0.0202 (16)  | 0.0228 (16)  | -0.0024 (13) | 0.0028 (13)  | -0.0024 (12) |
| O8B  | 0.028 (2)   | 0.057 (3)    | 0.054 (3)    | -0.0225 (19) | 0.0146 (18)  | -0.021 (2)   |
| N1B  | 0.035 (2)   | 0.022 (2)    | 0.0226 (19)  | -0.0064 (17) | 0.0075 (17)  | -0.0053 (15) |
| N2B  | 0.021 (2)   | 0.024 (2)    | 0.030 (2)    | 0.0006 (17)  | 0.0091 (16)  | 0.0043 (16)  |
| N3B  | 0.031 (2)   | 0.0205 (19)  | 0.0193 (18)  | 0.0073 (17)  | 0.0052 (16)  | 0.0034 (14)  |
| N4B  | 0.025 (2)   | 0.023 (2)    | 0.031 (2)    | 0.0005 (17)  | 0.0082 (17)  | -0.0064 (16) |
| C1B  | 0.038 (3)   | 0.031 (3)    | 0.033 (3)    | -0.012 (2)   | 0.005 (2)    | -0.011 (2)   |
| C2B  | 0.032 (3)   | 0.028 (3)    | 0.044 (3)    | -0.011 (2)   | 0.011 (2)    | -0.011 (2)   |
| C3B  | 0.026 (3)   | 0.029 (3)    | 0.041 (3)    | -0.006 (2)   | 0.006 (2)    | 0.004 (2)    |
| C4B  | 0.039 (3)   | 0.028 (3)    | 0.023 (2)    | -0.004 (2)   | 0.013 (2)    | 0.0086 (18)  |
| C5B  | 0.038 (3)   | 0.029 (3)    | 0.024 (2)    | -0.001 (2)   | 0.004 (2)    | 0.0089 (19)  |
| C6B  | 0.027 (3)   | 0.032 (3)    | 0.028 (2)    | 0.009 (2)    | 0.0004 (19)  | 0.005 (2)    |
| C7B  | 0.027 (3)   | 0.023 (3)    | 0.047 (3)    | 0.012 (2)    | 0.012 (2)    | 0.008 (2)    |
| C8B  | 0.036 (3)   | 0.027 (3)    | 0.034 (3)    | 0.006 (2)    | 0.009 (2)    | -0.006 (2)   |
| C9B  | 0.049 (3)   | 0.024 (3)    | 0.025 (2)    | 0.006 (2)    | 0.014 (2)    | -0.0063 (19) |
| C10B | 0.030 (3)   | 0.037 (3)    | 0.015 (2)    | -0.006 (2)   | 0.0018 (19)  | -0.0058 (19) |
| C11B | 0.022 (2)   | 0.023 (2)    | 0.018 (2)    | 0.0060 (19)  | 0.0082 (17)  | 0.0008 (17)  |
| C12B | 0.016 (2)   | 0.035 (3)    | 0.030 (2)    | 0.001 (2)    | 0.0092 (18)  | 0.001 (2)    |
| C13B | 0.020 (2)   | 0.027 (3)    | 0.027 (3)    | 0.004 (2)    | 0.0050 (19)  | -0.0016 (18) |

|      |              |              |              |               |              |               |
|------|--------------|--------------|--------------|---------------|--------------|---------------|
| C14B | 0.026 (3)    | 0.029 (3)    | 0.017 (2)    | 0.002 (2)     | 0.0001 (18)  | 0.0006 (17)   |
| C15B | 0.022 (2)    | 0.021 (2)    | 0.019 (2)    | -0.0043 (19)  | 0.0053 (17)  | 0.0004 (16)   |
| C16B | 0.020 (2)    | 0.031 (3)    | 0.033 (3)    | 0.001 (2)     | 0.011 (2)    | -0.004 (2)    |
| C17B | 0.021 (3)    | 0.031 (3)    | 0.022 (2)    | -0.002 (2)    | 0.0067 (18)  | 0.0016 (18)   |
| Zr3  | 0.01361 (19) | 0.00982 (17) | 0.01459 (17) | -0.00049 (15) | 0.00310 (13) | -0.00080 (14) |
| O1C  | 0.0178 (16)  | 0.0135 (14)  | 0.0201 (15)  | -0.0019 (12)  | 0.0064 (12)  | -0.0034 (11)  |
| O2C  | 0.0244 (18)  | 0.0219 (17)  | 0.0366 (19)  | 0.0032 (14)   | 0.0102 (14)  | -0.0043 (14)  |
| O3C  | 0.0174 (15)  | 0.0164 (15)  | 0.0173 (14)  | 0.0037 (12)   | 0.0047 (11)  | 0.0023 (11)   |
| O4C  | 0.034 (2)    | 0.0274 (18)  | 0.0229 (17)  | 0.0105 (15)   | 0.0014 (14)  | 0.0090 (13)   |
| O5C  | 0.0160 (15)  | 0.0143 (15)  | 0.0239 (16)  | -0.0011 (12)  | 0.0049 (12)  | 0.0008 (11)   |
| O6C  | 0.0209 (18)  | 0.0246 (18)  | 0.042 (2)    | -0.0061 (14)  | 0.0087 (15)  | 0.0075 (14)   |
| O7C  | 0.0178 (16)  | 0.0170 (15)  | 0.0200 (16)  | -0.0024 (12)  | 0.0023 (12)  | -0.0026 (11)  |
| O8C  | 0.042 (2)    | 0.039 (2)    | 0.0212 (18)  | -0.0130 (18)  | 0.0016 (16)  | -0.0080 (14)  |
| N1C  | 0.0179 (18)  | 0.0118 (16)  | 0.0180 (17)  | -0.0015 (14)  | 0.0046 (13)  | -0.0017 (12)  |
| N2C  | 0.0171 (18)  | 0.0167 (18)  | 0.0168 (17)  | -0.0004 (15)  | 0.0038 (14)  | -0.0004 (13)  |
| N3C  | 0.0165 (18)  | 0.0133 (17)  | 0.0186 (17)  | 0.0014 (14)   | 0.0027 (14)  | 0.0013 (13)   |
| N4C  | 0.0188 (18)  | 0.0138 (16)  | 0.0154 (17)  | -0.0018 (14)  | 0.0032 (13)  | -0.0023 (12)  |
| C1C  | 0.021 (2)    | 0.019 (2)    | 0.021 (2)    | -0.0037 (18)  | -0.0009 (17) | -0.0037 (16)  |
| C2C  | 0.020 (2)    | 0.018 (2)    | 0.021 (2)    | -0.0039 (18)  | -0.0003 (17) | -0.0050 (16)  |
| C3C  | 0.026 (2)    | 0.019 (2)    | 0.019 (2)    | -0.0039 (19)  | 0.0058 (17)  | -0.0069 (16)  |
| C4C  | 0.018 (2)    | 0.021 (2)    | 0.021 (2)    | 0.0043 (18)   | 0.0058 (17)  | -0.0033 (16)  |
| C5C  | 0.024 (2)    | 0.018 (2)    | 0.020 (2)    | 0.0035 (18)   | 0.0045 (17)  | -0.0058 (16)  |
| C6C  | 0.022 (2)    | 0.023 (2)    | 0.021 (2)    | 0.0076 (19)   | 0.0030 (18)  | 0.0050 (17)   |
| C7C  | 0.027 (3)    | 0.014 (2)    | 0.025 (2)    | 0.0066 (18)   | 0.0056 (19)  | 0.0055 (16)   |
| C8C  | 0.026 (3)    | 0.014 (2)    | 0.022 (2)    | -0.0047 (18)  | 0.0062 (19)  | 0.0007 (15)   |
| C9C  | 0.021 (2)    | 0.015 (2)    | 0.019 (2)    | -0.0042 (18)  | 0.0052 (17)  | -0.0032 (15)  |
| C10C | 0.017 (2)    | 0.020 (2)    | 0.023 (2)    | -0.0007 (18)  | 0.0037 (18)  | -0.0027 (17)  |
| C11C | 0.018 (2)    | 0.016 (2)    | 0.020 (2)    | -0.0003 (17)  | 0.0074 (17)  | 0.0030 (16)   |
| C12C | 0.028 (3)    | 0.019 (2)    | 0.015 (2)    | 0.0026 (19)   | 0.0078 (18)  | 0.0042 (16)   |

|      |           |           |           |              |             |              |
|------|-----------|-----------|-----------|--------------|-------------|--------------|
| C13C | 0.017 (2) | 0.015 (2) | 0.027 (2) | -0.0019 (17) | 0.0011 (17) | 0.0018 (16)  |
| C14C | 0.014 (2) | 0.020 (2) | 0.025 (2) | -0.0020 (17) | 0.0055 (18) | -0.0003 (17) |
| C15C | 0.019 (2) | 0.018 (2) | 0.022 (2) | -0.0033 (18) | 0.0051 (17) | -0.0038 (16) |
| C16C | 0.023 (2) | 0.023 (2) | 0.015 (2) | 0.0005 (18)  | 0.0025 (17) | 0.0020 (15)  |
| C17C | 0.020 (3) | 0.024 (2) | 0.018 (2) | 0.0034 (19)  | 0.0034 (18) | -0.0015 (17) |
| O1   | 0.060 (3) | 0.040 (2) | 0.032 (2) | 0.012 (2)    | -0.003 (2)  | -0.0060 (17) |
| O2   | 0.037 (3) | 0.079 (3) | 0.050 (3) | 0.007 (3)    | 0.003 (2)   | 0.023 (2)    |
| O3   | 0.047 (2) | 0.029 (2) | 0.028 (2) | 0.0050 (19)  | 0.0079 (17) | 0.0040 (15)  |
| O4   | 0.036 (2) | 0.032 (2) | 0.052 (3) | 0.0051 (18)  | 0.0124 (19) | -0.0029 (18) |
| O5   | 0.047 (3) | 0.032 (2) | 0.056 (3) | -0.013 (2)   | -0.004 (2)  | 0.012 (2)    |
| O6   | 0.060 (3) | 0.040 (2) | 0.034 (2) | -0.022 (2)   | 0.008 (2)   | -0.0014 (18) |
| O7   | 0.037 (3) | 0.070 (3) | 0.050 (3) | -0.008 (2)   | -0.001 (2)  | -0.024 (2)   |
| O8   | 0.045 (3) | 0.034 (2) | 0.059 (3) | 0.012 (2)    | -0.004 (2)  | -0.013 (2)   |
| O9   | 0.032 (2) | 0.034 (2) | 0.050 (3) | -0.0019 (18) | 0.0085 (19) | 0.0064 (18)  |
| O10  | 0.044 (2) | 0.026 (2) | 0.030 (2) | -0.0060 (18) | 0.0075 (17) | -0.0025 (15) |

**Table S4. Geometric parameters (Å, °)**

|          |           |           |           |
|----------|-----------|-----------|-----------|
| Zr1—O1A  | 2.099 (3) | C6B—H6C   | 0.9900    |
| Zr1—O5A  | 2.114 (3) | C6B—H6D   | 0.9900    |
| Zr1—O7A  | 2.129 (3) | C7B—H7C   | 0.9900    |
| Zr1—O3A  | 2.160 (3) | C7B—H7D   | 0.9900    |
| Zr1—N4A  | 2.451 (4) | C8B—C9B   | 1.491 (7) |
| Zr1—N2A  | 2.466 (3) | C8B—H8C   | 0.9900    |
| Zr1—N3A  | 2.468 (4) | C8B—H8D   | 0.9900    |
| Zr1—N1A  | 2.538 (4) | C9B—H9C   | 0.9900    |
| O1A—C11A | 1.305 (6) | C9B—H9D   | 0.9900    |
| O2A—C11A | 1.218 (5) | C10B—C11B | 1.519 (7) |
| O3A—C13A | 1.287 (5) | C10B—H10C | 0.9900    |

|          |           |           |           |
|----------|-----------|-----------|-----------|
| O4A—C13A | 1.226 (5) | C10B—H10D | 0.9900    |
| O5A—C15A | 1.307 (5) | C12B—C13B | 1.496 (7) |
| O6A—C15A | 1.223 (5) | C12B—H12C | 0.9900    |
| O7A—C17A | 1.282 (6) | C12B—H12D | 0.9900    |
| O8A—C17A | 1.223 (6) | C14B—C15B | 1.506 (7) |
| N1A—C1A  | 1.496 (5) | C14B—H14C | 0.9900    |
| N1A—C10A | 1.496 (6) | C14B—H14D | 0.9900    |
| N1A—C9A  | 1.501 (5) | C16B—C17B | 1.501 (7) |
| N2A—C12A | 1.488 (5) | C16B—H16C | 0.9900    |
| N2A—C4A  | 1.496 (6) | C16B—H16D | 0.9900    |
| N2A—C3A  | 1.514 (5) | Zr3—O1C   | 2.091 (3) |
| N3A—C14A | 1.484 (6) | Zr3—O5C   | 2.113 (3) |
| N3A—C6A  | 1.493 (6) | Zr3—O7C   | 2.126 (3) |
| N3A—C5A  | 1.494 (5) | Zr3—O3C   | 2.148 (3) |
| N4A—C16A | 1.485 (5) | Zr3—N4C   | 2.451 (3) |
| N4A—C7A  | 1.494 (6) | Zr3—N3C   | 2.465 (4) |
| N4A—C8A  | 1.496 (6) | Zr3—N2C   | 2.468 (3) |
| C1A—C2A  | 1.516 (6) | Zr3—N1C   | 2.536 (4) |
| C1A—H1A  | 0.9900    | O1C—C11C  | 1.319 (5) |
| C1A—H1B  | 0.9900    | O2C—C11C  | 1.209 (5) |
| C2A—C3A  | 1.510 (7) | O3C—C13C  | 1.288 (5) |
| C2A—H2A  | 0.9900    | O4C—C13C  | 1.228 (5) |
| C2A—H2B  | 0.9900    | O5C—C15C  | 1.303 (5) |
| C3A—H3A  | 0.9900    | O6C—C15C  | 1.216 (5) |
| C3A—H3B  | 0.9900    | O7C—C17C  | 1.294 (6) |
| C4A—C5A  | 1.498 (6) | O8C—C17C  | 1.222 (6) |
| C4A—H4A  | 0.9900    | N1C—C9C   | 1.492 (5) |
| C4A—H4B  | 0.9900    | N1C—C10C  | 1.495 (6) |
| C5A—H5A  | 0.9900    | N1C—C1C   | 1.498 (5) |

|           |           |          |           |
|-----------|-----------|----------|-----------|
| C5A—H5B   | 0.9900    | N2C—C4C  | 1.493 (5) |
| C6A—C7A   | 1.491 (7) | N2C—C12C | 1.496 (5) |
| C6A—H6A   | 0.9900    | N2C—C3C  | 1.508 (5) |
| C6A—H6B   | 0.9900    | N3C—C14C | 1.482 (6) |
| C7A—H7A   | 0.9900    | N3C—C6C  | 1.493 (5) |
| C7A—H7B   | 0.9900    | N3C—C5C  | 1.499 (5) |
| C8A—C9A   | 1.492 (7) | N4C—C8C  | 1.486 (6) |
| C8A—H8A   | 0.9900    | N4C—C7C  | 1.488 (6) |
| C8A—H8B   | 0.9900    | N4C—C16C | 1.503 (5) |
| C9A—H9A   | 0.9900    | C1C—C2C  | 1.509 (6) |
| C9A—H9B   | 0.9900    | C1C—H1E  | 0.9900    |
| C10A—C11A | 1.514 (6) | C1C—H1F  | 0.9900    |
| C10A—H10A | 0.9900    | C2C—C3C  | 1.527 (6) |
| C10A—H10B | 0.9900    | C2C—H2E  | 0.9900    |
| C12A—C13A | 1.508 (6) | C2C—H2F  | 0.9900    |
| C12A—H12A | 0.9900    | C3C—H3E  | 0.9900    |
| C12A—H12B | 0.9900    | C3C—H3F  | 0.9900    |
| C14A—C15A | 1.497 (6) | C4C—C5C  | 1.501 (6) |
| C14A—H14A | 0.9900    | C4C—H4E  | 0.9900    |
| C14A—H14B | 0.9900    | C4C—H4F  | 0.9900    |
| C16A—C17A | 1.518 (6) | C5C—H5E  | 0.9900    |
| C16A—H16A | 0.9900    | C5C—H5F  | 0.9900    |
| C16A—H16B | 0.9900    | C6C—C7C  | 1.502 (7) |
| Zr2—O1B   | 2.103 (3) | C6C—H6E  | 0.9900    |
| Zr2—O5B   | 2.114 (3) | C6C—H6F  | 0.9900    |
| Zr2—O3B   | 2.114 (3) | C7C—H7E  | 0.9900    |
| Zr2—O7B   | 2.117 (3) | C7C—H7F  | 0.9900    |
| Zr2—N2B   | 2.440 (4) | C8C—C9C  | 1.493 (6) |
| Zr2—N4B   | 2.453 (4) | C8C—H8E  | 0.9900    |

|          |           |           |            |
|----------|-----------|-----------|------------|
| Zr2—N3B  | 2.476 (4) | C8C—H8F   | 0.9900     |
| Zr2—N1B  | 2.513 (4) | C9C—H9E   | 0.9900     |
| O1B—C11B | 1.312 (6) | C9C—H9F   | 0.9900     |
| O2B—C11B | 1.208 (5) | C10C—C11C | 1.512 (6)  |
| O3B—C13B | 1.297 (6) | C10C—H10E | 0.9900     |
| O4B—C13B | 1.217 (6) | C10C—H10F | 0.9900     |
| O5B—C15B | 1.298 (5) | C12C—C13C | 1.507 (6)  |
| O6B—C15B | 1.226 (5) | C12C—H12E | 0.9900     |
| O7B—C17B | 1.296 (6) | C12C—H12F | 0.9900     |
| O8B—C17B | 1.218 (6) | C14C—C15C | 1.508 (6)  |
| N1B—C10B | 1.491 (6) | C14C—H14E | 0.9900     |
| N1B—C1B  | 1.496 (6) | C14C—H14F | 0.9900     |
| N1B—C9B  | 1.527 (6) | C16C—C17C | 1.510 (7)  |
| N2B—C3B  | 1.492 (6) | C16C—H16E | 0.9900     |
| N2B—C12B | 1.496 (6) | C16C—H16F | 0.9900     |
| N2B—C4B  | 1.513 (6) | O1—H11    | 0.818 (14) |
| N3B—C14B | 1.471 (6) | O1—H12    | 0.818 (14) |
| N3B—C5B  | 1.479 (6) | O2—H21    | 0.825 (15) |
| N3B—C6B  | 1.506 (6) | O2—H22    | 0.824 (15) |
| N4B—C8B  | 1.492 (6) | O3—H31    | 0.814 (15) |
| N4B—C16B | 1.507 (6) | O3—H32    | 0.814 (14) |
| N4B—C7B  | 1.514 (7) | O4—H41    | 0.822 (15) |
| C1B—C2B  | 1.503 (8) | O4—H42    | 0.820 (15) |
| C1B—H1C  | 0.9900    | O5—H51    | 0.813 (14) |
| C1B—H1D  | 0.9900    | O5—H52    | 0.817 (14) |
| C2B—C3B  | 1.492 (8) | O6—H61    | 0.816 (15) |
| C2B—H2C  | 0.9900    | O6—H62    | 0.814 (14) |
| C2B—H2D  | 0.9900    | O7—H71    | 0.826 (14) |
| C3B—H3C  | 0.9900    | O7—H72    | 0.823 (15) |

|             |             |             |            |
|-------------|-------------|-------------|------------|
| C3B—H3D     | 0.9900      | O8—H81      | 0.810 (15) |
| C4B—C5B     | 1.465 (7)   | O8—H82      | 0.816 (14) |
| C4B—H4C     | 0.9900      | O9—H91      | 0.826 (14) |
| C4B—H4D     | 0.9900      | O9—H92      | 0.822 (14) |
| C5B—H5C     | 0.9900      | O10—H101    | 0.814 (14) |
| C5B—H5D     | 0.9900      | O10—H102    | 0.815 (15) |
| C6B—C7B     | 1.471 (7)   | N2B—C4B—H4D | 109.4      |
| O1A—Zr1—O5A | 114.05 (12) | H4C—C4B—H4D | 108.0      |
| O1A—Zr1—O7A | 75.02 (12)  | C4B—C5B—N3B | 110.4 (4)  |
| O5A—Zr1—O7A | 79.88 (12)  | C4B—C5B—H5C | 109.6      |
| O1A—Zr1—O3A | 76.12 (11)  | N3B—C5B—H5C | 109.6      |
| O5A—Zr1—O3A | 75.81 (12)  | C4B—C5B—H5D | 109.6      |
| O7A—Zr1—O3A | 129.97 (12) | N3B—C5B—H5D | 109.6      |
| O1A—Zr1—N4A | 89.25 (12)  | H5C—C5B—H5D | 108.1      |
| O5A—Zr1—N4A | 137.09 (12) | C7B—C6B—N3B | 110.4 (4)  |
| O7A—Zr1—N4A | 71.80 (12)  | C7B—C6B—H6C | 109.6      |
| O3A—Zr1—N4A | 146.86 (12) | N3B—C6B—H6C | 109.6      |
| O1A—Zr1—N2A | 141.02 (12) | C7B—C6B—H6D | 109.6      |
| O5A—Zr1—N2A | 76.30 (12)  | N3B—C6B—H6D | 109.6      |
| O7A—Zr1—N2A | 142.97 (12) | H6C—C6B—H6D | 108.1      |
| O3A—Zr1—N2A | 70.22 (11)  | C6B—C7B—N4B | 111.9 (4)  |
| N4A—Zr1—N2A | 108.49 (12) | C6B—C7B—H7C | 109.2      |
| O1A—Zr1—N3A | 146.55 (12) | N4B—C7B—H7C | 109.2      |
| O5A—Zr1—N3A | 71.23 (12)  | C6B—C7B—H7D | 109.2      |
| O7A—Zr1—N3A | 73.59 (12)  | N4B—C7B—H7D | 109.2      |
| O3A—Zr1—N3A | 134.49 (11) | H7C—C7B—H7D | 107.9      |
| N4A—Zr1—N3A | 70.23 (12)  | C9B—C8B—N4B | 109.9 (4)  |
| N2A—Zr1—N3A | 72.11 (12)  | C9B—C8B—H8C | 109.7      |
| O1A—Zr1—N1A | 67.82 (12)  | N4B—C8B—H8C | 109.7      |

|              |             |                |           |
|--------------|-------------|----------------|-----------|
| O5A—Zr1—N1A  | 150.57 (12) | C9B—C8B—H8D    | 109.7     |
| O7A—Zr1—N1A  | 126.40 (11) | N4B—C8B—H8D    | 109.7     |
| O3A—Zr1—N1A  | 76.41 (12)  | H8C—C8B—H8D    | 108.2     |
| N4A—Zr1—N1A  | 70.53 (12)  | C8B—C9B—N1B    | 110.6 (4) |
| N2A—Zr1—N1A  | 85.35 (12)  | C8B—C9B—H9C    | 109.5     |
| N3A—Zr1—N1A  | 124.72 (12) | N1B—C9B—H9C    | 109.5     |
| C11A—O1A—Zr1 | 122.5 (3)   | C8B—C9B—H9D    | 109.5     |
| C13A—O3A—Zr1 | 126.4 (3)   | N1B—C9B—H9D    | 109.5     |
| C15A—O5A—Zr1 | 126.2 (3)   | H9C—C9B—H9D    | 108.1     |
| C17A—O7A—Zr1 | 121.0 (3)   | N1B—C10B—C11B  | 110.2 (4) |
| C1A—N1A—C10A | 108.9 (4)   | N1B—C10B—H10C  | 109.6     |
| C1A—N1A—C9A  | 107.2 (3)   | C11B—C10B—H10C | 109.6     |
| C10A—N1A—C9A | 105.6 (3)   | N1B—C10B—H10D  | 109.6     |
| C1A—N1A—Zr1  | 123.6 (3)   | C11B—C10B—H10D | 109.6     |
| C10A—N1A—Zr1 | 103.1 (2)   | H10C—C10B—H10D | 108.1     |
| C9A—N1A—Zr1  | 107.2 (2)   | O2B—C11B—O1B   | 123.9 (5) |
| C12A—N2A—C4A | 108.1 (3)   | O2B—C11B—C10B  | 121.9 (4) |
| C12A—N2A—C3A | 107.7 (3)   | O1B—C11B—C10B  | 114.2 (4) |
| C4A—N2A—C3A  | 108.0 (3)   | C13B—C12B—N2B  | 112.6 (4) |
| C12A—N2A—Zr1 | 107.7 (3)   | C13B—C12B—H12C | 109.1     |
| C4A—N2A—Zr1  | 110.7 (2)   | N2B—C12B—H12C  | 109.1     |
| C3A—N2A—Zr1  | 114.4 (3)   | C13B—C12B—H12D | 109.1     |
| C14A—N3A—C6A | 109.7 (3)   | N2B—C12B—H12D  | 109.1     |
| C14A—N3A—C5A | 109.3 (3)   | H12C—C12B—H12D | 107.8     |
| C6A—N3A—C5A  | 108.3 (3)   | O4B—C13B—O3B   | 123.7 (5) |
| C14A—N3A—Zr1 | 106.8 (3)   | O4B—C13B—C12B  | 120.4 (5) |
| C6A—N3A—Zr1  | 112.6 (3)   | O3B—C13B—C12B  | 115.9 (4) |
| C5A—N3A—Zr1  | 110.1 (3)   | N3B—C14B—C15B  | 113.0 (4) |
| C16A—N4A—C7A | 109.5 (4)   | N3B—C14B—H14C  | 109.0     |



|              |           |                |             |
|--------------|-----------|----------------|-------------|
| C16A—N4A—C8A | 108.9 (3) | C15B—C14B—H14C | 109.0       |
| C7A—N4A—C8A  | 107.4 (3) | N3B—C14B—H14D  | 109.0       |
| C16A—N4A—Zr1 | 103.9 (2) | C15B—C14B—H14D | 109.0       |
| C7A—N4A—Zr1  | 113.2 (2) | H14C—C14B—H14D | 107.8       |
| C8A—N4A—Zr1  | 113.8 (3) | O6B—C15B—O5B   | 123.0 (4)   |
| N1A—C1A—C2A  | 115.2 (4) | O6B—C15B—C14B  | 120.4 (4)   |
| N1A—C1A—H1A  | 108.5     | O5B—C15B—C14B  | 116.5 (4)   |
| C2A—C1A—H1A  | 108.5     | C17B—C16B—N4B  | 111.9 (4)   |
| N1A—C1A—H1B  | 108.5     | C17B—C16B—H16C | 109.2       |
| C2A—C1A—H1B  | 108.5     | N4B—C16B—H16C  | 109.2       |
| H1A—C1A—H1B  | 107.5     | C17B—C16B—H16D | 109.2       |
| C3A—C2A—C1A  | 114.0 (4) | N4B—C16B—H16D  | 109.2       |
| C3A—C2A—H2A  | 108.8     | H16C—C16B—H16D | 107.9       |
| C1A—C2A—H2A  | 108.8     | O8B—C17B—O7B   | 123.2 (5)   |
| C3A—C2A—H2B  | 108.8     | O8B—C17B—C16B  | 120.5 (5)   |
| C1A—C2A—H2B  | 108.8     | O7B—C17B—C16B  | 116.3 (4)   |
| H2A—C2A—H2B  | 107.6     | O1C—Zr3—O5C    | 113.92 (12) |
| C2A—C3A—N2A  | 116.5 (4) | O1C—Zr3—O7C    | 74.97 (12)  |
| C2A—C3A—H3A  | 108.2     | O5C—Zr3—O7C    | 79.40 (12)  |
| N2A—C3A—H3A  | 108.2     | O1C—Zr3—O3C    | 76.07 (11)  |
| C2A—C3A—H3B  | 108.2     | O5C—Zr3—O3C    | 75.97 (11)  |
| N2A—C3A—H3B  | 108.2     | O7C—Zr3—O3C    | 129.64 (12) |
| H3A—C3A—H3B  | 107.3     | O1C—Zr3—N4C    | 88.99 (11)  |
| N2A—C4A—C5A  | 110.9 (4) | O5C—Zr3—N4C    | 136.95 (12) |
| N2A—C4A—H4A  | 109.5     | O7C—Zr3—N4C    | 71.85 (11)  |
| C5A—C4A—H4A  | 109.5     | O3C—Zr3—N4C    | 146.90 (12) |
| N2A—C4A—H4B  | 109.5     | O1C—Zr3—N3C    | 146.35 (12) |
| C5A—C4A—H4B  | 109.5     | O5C—Zr3—N3C    | 71.17 (11)  |
| H4A—C4A—H4B  | 108.0     | O7C—Zr3—N3C    | 73.48 (12)  |

|             |           |              |             |
|-------------|-----------|--------------|-------------|
| N3A—C5A—C4A | 110.9 (4) | O3C—Zr3—N3C  | 134.66 (11) |
| N3A—C5A—H5A | 109.5     | N4C—Zr3—N3C  | 70.35 (12)  |
| C4A—C5A—H5A | 109.5     | O1C—Zr3—N2C  | 141.19 (12) |
| N3A—C5A—H5B | 109.5     | O5C—Zr3—N2C  | 76.71 (12)  |
| C4A—C5A—H5B | 109.5     | O7C—Zr3—N2C  | 142.87 (12) |
| H5A—C5A—H5B | 108.0     | O3C—Zr3—N2C  | 70.55 (11)  |
| C7A—C6A—N3A | 108.5 (4) | N4C—Zr3—N2C  | 108.52 (11) |
| C7A—C6A—H6A | 110.0     | N3C—Zr3—N2C  | 72.11 (12)  |
| N3A—C6A—H6A | 110.0     | O1C—Zr3—N1C  | 67.96 (11)  |
| C7A—C6A—H6B | 110.0     | O5C—Zr3—N1C  | 151.11 (11) |
| N3A—C6A—H6B | 110.0     | O7C—Zr3—N1C  | 126.40 (11) |
| H6A—C6A—H6B | 108.4     | O3C—Zr3—N1C  | 76.78 (11)  |
| C6A—C7A—N4A | 111.5 (4) | N4C—Zr3—N1C  | 70.22 (11)  |
| C6A—C7A—H7A | 109.3     | N3C—Zr3—N1C  | 124.54 (11) |
| N4A—C7A—H7A | 109.3     | N2C—Zr3—N1C  | 85.35 (11)  |
| C6A—C7A—H7B | 109.3     | C11C—O1C—Zr3 | 123.0 (3)   |
| N4A—C7A—H7B | 109.3     | C13C—O3C—Zr3 | 126.6 (3)   |
| H7A—C7A—H7B | 108.0     | C15C—O5C—Zr3 | 126.5 (3)   |
| C9A—C8A—N4A | 110.0 (3) | C17C—O7C—Zr3 | 121.8 (3)   |
| C9A—C8A—H8A | 109.7     | C9C—N1C—C10C | 105.5 (3)   |
| N4A—C8A—H8A | 109.7     | C9C—N1C—C1C  | 107.5 (3)   |
| C9A—C8A—H8B | 109.7     | C10C—N1C—C1C | 108.9 (3)   |
| N4A—C8A—H8B | 109.7     | C9C—N1C—Zr3  | 107.5 (2)   |
| H8A—C8A—H8B | 108.2     | C10C—N1C—Zr3 | 102.7 (3)   |
| C8A—C9A—N1A | 109.4 (4) | C1C—N1C—Zr3  | 123.5 (3)   |
| C8A—C9A—H9A | 109.8     | C4C—N2C—C12C | 107.8 (3)   |
| N1A—C9A—H9A | 109.8     | C4C—N2C—C3C  | 107.9 (3)   |
| C8A—C9A—H9B | 109.8     | C12C—N2C—C3C | 108.6 (3)   |
| N1A—C9A—H9B | 109.8     | C4C—N2C—Zr3  | 110.7 (2)   |

|                |           |              |           |
|----------------|-----------|--------------|-----------|
| H9A—C9A—H9B    | 108.2     | C12C—N2C—Zr3 | 106.9 (2) |
| N1A—C10A—C11A  | 109.9 (4) | C3C—N2C—Zr3  | 114.7 (2) |
| N1A—C10A—H10A  | 109.7     | C14C—N3C—C6C | 109.0 (3) |
| C11A—C10A—H10A | 109.7     | C14C—N3C—C5C | 109.4 (3) |
| N1A—C10A—H10B  | 109.7     | C6C—N3C—C5C  | 108.7 (3) |
| C11A—C10A—H10B | 109.7     | C14C—N3C—Zr3 | 107.2 (3) |
| H10A—C10A—H10B | 108.2     | C6C—N3C—Zr3  | 112.4 (3) |
| O2A—C11A—O1A   | 123.8 (4) | C5C—N3C—Zr3  | 110.1 (2) |
| O2A—C11A—C10A  | 120.4 (4) | C8C—N4C—C7C  | 107.3 (3) |
| O1A—C11A—C10A  | 115.8 (4) | C8C—N4C—C16C | 109.0 (3) |
| N2A—C12A—C13A  | 111.8 (4) | C7C—N4C—C16C | 109.2 (3) |
| N2A—C12A—H12A  | 109.3     | C8C—N4C—Zr3  | 114.0 (3) |
| C13A—C12A—H12A | 109.3     | C7C—N4C—Zr3  | 113.4 (2) |
| N2A—C12A—H12B  | 109.3     | C16C—N4C—Zr3 | 103.7 (2) |
| C13A—C12A—H12B | 109.3     | N1C—C1C—C2C  | 115.2 (4) |
| H12A—C12A—H12B | 107.9     | N1C—C1C—H1E  | 108.5     |
| O4A—C13A—O3A   | 124.0 (4) | C2C—C1C—H1E  | 108.5     |
| O4A—C13A—C12A  | 120.3 (4) | N1C—C1C—H1F  | 108.5     |
| O3A—C13A—C12A  | 115.7 (4) | C2C—C1C—H1F  | 108.5     |
| N3A—C14A—C15A  | 112.0 (4) | H1E—C1C—H1F  | 107.5     |
| N3A—C14A—H14A  | 109.2     | C1C—C2C—C3C  | 114.0 (4) |
| C15A—C14A—H14A | 109.2     | C1C—C2C—H2E  | 108.8     |
| N3A—C14A—H14B  | 109.2     | C3C—C2C—H2E  | 108.8     |
| C15A—C14A—H14B | 109.2     | C1C—C2C—H2F  | 108.8     |
| H14A—C14A—H14B | 107.9     | C3C—C2C—H2F  | 108.8     |
| O6A—C15A—O5A   | 123.4 (4) | H2E—C2C—H2F  | 107.7     |
| O6A—C15A—C14A  | 120.9 (4) | N2C—C3C—C2C  | 115.8 (3) |
| O5A—C15A—C14A  | 115.7 (4) | N2C—C3C—H3E  | 108.3     |
| N4A—C16A—C17A  | 113.2 (4) | C2C—C3C—H3E  | 108.3     |

|                |             |             |           |
|----------------|-------------|-------------|-----------|
| N4A—C16A—H16A  | 108.9       | N2C—C3C—H3F | 108.3     |
| C17A—C16A—H16A | 108.9       | C2C—C3C—H3F | 108.3     |
| N4A—C16A—H16B  | 108.9       | H3E—C3C—H3F | 107.4     |
| C17A—C16A—H16B | 108.9       | N2C—C4C—C5C | 110.6 (3) |
| H16A—C16A—H16B | 107.7       | N2C—C4C—H4E | 109.5     |
| O8A—C17A—O7A   | 124.6 (5)   | C5C—C4C—H4E | 109.5     |
| O8A—C17A—C16A  | 118.7 (5)   | N2C—C4C—H4F | 109.5     |
| O7A—C17A—C16A  | 116.7 (4)   | C5C—C4C—H4F | 109.5     |
| O1B—Zr2—O5B    | 114.01 (11) | H4E—C4C—H4F | 108.1     |
| O1B—Zr2—O3B    | 75.83 (12)  | N3C—C5C—C4C | 110.9 (3) |
| O5B—Zr2—O3B    | 76.27 (12)  | N3C—C5C—H5E | 109.5     |
| O1B—Zr2—O7B    | 75.59 (12)  | C4C—C5C—H5E | 109.5     |
| O5B—Zr2—O7B    | 77.28 (12)  | N3C—C5C—H5F | 109.5     |
| O3B—Zr2—O7B    | 128.19 (11) | C4C—C5C—H5F | 109.5     |
| O1B—Zr2—N2B    | 142.00 (14) | H5E—C5C—H5F | 108.1     |
| O5B—Zr2—N2B    | 76.50 (13)  | N3C—C6C—C7C | 108.6 (4) |
| O3B—Zr2—N2B    | 71.51 (13)  | N3C—C6C—H6E | 110.0     |
| O7B—Zr2—N2B    | 141.12 (13) | C7C—C6C—H6E | 110.0     |
| O1B—Zr2—N4B    | 88.01 (13)  | N3C—C6C—H6F | 110.0     |
| O5B—Zr2—N4B    | 136.35 (13) | C7C—C6C—H6F | 110.0     |
| O3B—Zr2—N4B    | 147.34 (12) | H6E—C6C—H6F | 108.4     |
| O7B—Zr2—N4B    | 72.38 (13)  | N4C—C7C—C6C | 111.2 (3) |
| N2B—Zr2—N4B    | 109.61 (14) | N4C—C7C—H7E | 109.4     |
| O1B—Zr2—N3B    | 145.70 (13) | C6C—C7C—H7E | 109.4     |
| O5B—Zr2—N3B    | 71.07 (12)  | N4C—C7C—H7F | 109.4     |
| O3B—Zr2—N3B    | 135.41 (12) | C6C—C7C—H7F | 109.4     |
| O7B—Zr2—N3B    | 72.65 (13)  | H7E—C7C—H7F | 108.0     |
| N2B—Zr2—N3B    | 71.96 (13)  | N4C—C8C—C9C | 110.2 (3) |
| N4B—Zr2—N3B    | 70.39 (13)  | N4C—C8C—H8E | 109.6     |

|              |             |                |           |
|--------------|-------------|----------------|-----------|
| O1B—Zr2—N1B  | 67.97 (13)  | C9C—C8C—H8E    | 109.6     |
| O5B—Zr2—N1B  | 151.43 (14) | N4C—C8C—H8F    | 109.6     |
| O3B—Zr2—N1B  | 76.86 (13)  | C9C—C8C—H8F    | 109.6     |
| O7B—Zr2—N1B  | 128.13 (13) | H8E—C8C—H8F    | 108.1     |
| N2B—Zr2—N1B  | 85.93 (13)  | N1C—C9C—C8C    | 109.4 (3) |
| N4B—Zr2—N1B  | 70.76 (13)  | N1C—C9C—H9E    | 109.8     |
| N3B—Zr2—N1B  | 124.67 (13) | C8C—C9C—H9E    | 109.8     |
| C11B—O1B—Zr2 | 123.9 (3)   | N1C—C9C—H9F    | 109.8     |
| C13B—O3B—Zr2 | 125.1 (3)   | C8C—C9C—H9F    | 109.8     |
| C15B—O5B—Zr2 | 125.6 (3)   | H9E—C9C—H9F    | 108.2     |
| C17B—O7B—Zr2 | 122.2 (3)   | N1C—C10C—C11C  | 110.6 (4) |
| C10B—N1B—C1B | 110.2 (4)   | N1C—C10C—H10E  | 109.5     |
| C10B—N1B—C9B | 105.3 (4)   | C11C—C10C—H10E | 109.5     |
| C1B—N1B—C9B  | 107.0 (4)   | N1C—C10C—H10F  | 109.5     |
| C10B—N1B—Zr2 | 103.3 (3)   | C11C—C10C—H10F | 109.5     |
| C1B—N1B—Zr2  | 121.9 (3)   | H10E—C10C—H10F | 108.1     |
| C9B—N1B—Zr2  | 108.1 (3)   | O2C—C11C—O1C   | 124.2 (4) |
| C3B—N2B—C12B | 107.6 (4)   | O2C—C11C—C10C  | 121.1 (4) |
| C3B—N2B—C4B  | 107.8 (4)   | O1C—C11C—C10C  | 114.8 (4) |
| C12B—N2B—C4B | 108.2 (4)   | N2C—C12C—C13C  | 111.8 (4) |
| C3B—N2B—Zr2  | 116.7 (3)   | N2C—C12C—H12E  | 109.3     |
| C12B—N2B—Zr2 | 106.1 (3)   | C13C—C12C—H12E | 109.3     |
| C4B—N2B—Zr2  | 110.1 (3)   | N2C—C12C—H12F  | 109.3     |
| C14B—N3B—C5B | 110.1 (4)   | C13C—C12C—H12F | 109.3     |
| C14B—N3B—C6B | 108.6 (4)   | H12E—C12C—H12F | 107.9     |
| C5B—N3B—C6B  | 109.0 (4)   | O4C—C13C—O3C   | 124.3 (4) |
| C14B—N3B—Zr2 | 107.3 (3)   | O4C—C13C—C12C  | 120.2 (4) |
| C5B—N3B—Zr2  | 109.6 (3)   | O3C—C13C—C12C  | 115.5 (4) |
| C6B—N3B—Zr2  | 112.3 (3)   | N3C—C14C—C15C  | 111.8 (4) |

|                  |           |                   |            |
|------------------|-----------|-------------------|------------|
| C8B—N4B—C16B     | 109.5 (4) | N3C—C14C—H14E     | 109.3      |
| C8B—N4B—C7B      | 107.8 (4) | C15C—C14C—H14E    | 109.3      |
| C16B—N4B—C7B     | 108.7 (4) | N3C—C14C—H14F     | 109.3      |
| C8B—N4B—Zr2      | 114.9 (3) | C15C—C14C—H14F    | 109.3      |
| C16B—N4B—Zr2     | 101.6 (3) | H14E—C14C—H14F    | 107.9      |
| C7B—N4B—Zr2      | 114.1 (3) | O6C—C15C—O5C      | 123.5 (4)  |
| N1B—C1B—C2B      | 115.4 (4) | O6C—C15C—C14C     | 120.8 (4)  |
| N1B—C1B—H1C      | 108.4     | O5C—C15C—C14C     | 115.6 (4)  |
| C2B—C1B—H1C      | 108.4     | N4C—C16C—C17C     | 113.2 (4)  |
| N1B—C1B—H1D      | 108.4     | N4C—C16C—H16E     | 108.9      |
| C2B—C1B—H1D      | 108.4     | C17C—C16C—H16E    | 108.9      |
| H1C—C1B—H1D      | 107.5     | N4C—C16C—H16F     | 108.9      |
| C3B—C2B—C1B      | 115.9 (5) | C17C—C16C—H16F    | 108.9      |
| C3B—C2B—H2C      | 108.3     | H16E—C16C—H16F    | 107.8      |
| C1B—C2B—H2C      | 108.3     | O8C—C17C—O7C      | 125.3 (5)  |
| C3B—C2B—H2D      | 108.3     | O8C—C17C—C16C     | 118.3 (4)  |
| C1B—C2B—H2D      | 108.3     | O7C—C17C—C16C     | 116.4 (4)  |
| H2C—C2B—H2D      | 107.4     | H11—O1—H12        | 104 (3)    |
| N2B—C3B—C2B      | 116.0 (4) | H21—O2—H22        | 103 (3)    |
| N2B—C3B—H3C      | 108.3     | H31—O3—H32        | 108 (3)    |
| C2B—C3B—H3C      | 108.3     | H41—O4—H42        | 104 (3)    |
| N2B—C3B—H3D      | 108.3     | H51—O5—H52        | 107 (4)    |
| C2B—C3B—H3D      | 108.3     | H61—O6—H62        | 107 (3)    |
| H3C—C3B—H3D      | 107.4     | H71—O7—H72        | 106 (3)    |
| C5B—C4B—N2B      | 111.2 (4) | H81—O8—H82        | 107 (4)    |
| C5B—C4B—H4C      | 109.4     | H91—O9—H92        | 102 (3)    |
| N2B—C4B—H4C      | 109.4     | H101—O10—H102     | 107 (3)    |
| C5B—C4B—H4D      | 109.4     | C1B—N1B—C10B—C11B | -169.4 (4) |
| C10A—N1A—C1A—C2A | 89.1 (5)  | C9B—N1B—C10B—C11B | 75.6 (4)   |

|                   |            |                   |            |
|-------------------|------------|-------------------|------------|
| C9A—N1A—C1A—C2A   | -157.1 (4) | Zr2—N1B—C10B—C11B | -37.7 (4)  |
| Zr1—N1A—C1A—C2A   | -31.8 (5)  | Zr2—O1B—C11B—O2B  | -155.5 (4) |
| N1A—C1A—C2A—C3A   | 69.3 (5)   | Zr2—O1B—C11B—C10B | 25.6 (5)   |
| C1A—C2A—C3A—N2A   | -89.6 (5)  | N1B—C10B—C11B—O2B | -163.7 (4) |
| C12A—N2A—C3A—C2A  | -61.1 (5)  | N1B—C10B—C11B—O1B | 15.3 (6)   |
| C4A—N2A—C3A—C2A   | -177.6 (4) | C3B—N2B—C12B—C13B | 96.4 (5)   |
| Zr1—N2A—C3A—C2A   | 58.6 (4)   | C4B—N2B—C12B—C13B | -147.4 (4) |
| C12A—N2A—C4A—C5A  | 159.1 (4)  | Zr2—N2B—C12B—C13B | -29.3 (5)  |
| C3A—N2A—C4A—C5A   | -84.6 (4)  | Zr2—O3B—C13B—O4B  | -169.8 (4) |
| Zr1—N2A—C4A—C5A   | 41.4 (4)   | Zr2—O3B—C13B—C12B | 8.4 (6)    |
| C14A—N3A—C5A—C4A  | -73.3 (4)  | N2B—C12B—C13B—O4B | -164.2 (5) |
| C6A—N3A—C5A—C4A   | 167.2 (4)  | N2B—C12B—C13B—O3B | 17.5 (6)   |
| Zr1—N3A—C5A—C4A   | 43.7 (4)   | C5B—N3B—C14B—C15B | 94.9 (5)   |
| N2A—C4A—C5A—N3A   | -58.2 (5)  | C6B—N3B—C14B—C15B | -145.8 (4) |
| C14A—N3A—C6A—C7A  | 163.7 (4)  | Zr2—N3B—C14B—C15B | -24.3 (5)  |
| C5A—N3A—C6A—C7A   | -77.0 (4)  | Zr2—O5B—C15B—O6B  | -168.4 (3) |
| Zr1—N3A—C6A—C7A   | 45.0 (4)   | Zr2—O5B—C15B—C14B | 9.6 (6)    |
| N3A—C6A—C7A—N4A   | -55.3 (5)  | N3B—C14B—C15B—O6B | -168.7 (4) |
| C16A—N4A—C7A—C6A  | -76.8 (4)  | N3B—C14B—C15B—O5B | 13.3 (6)   |
| C8A—N4A—C7A—C6A   | 165.1 (4)  | C8B—N4B—C16B—C17B | -161.0 (4) |
| Zr1—N4A—C7A—C6A   | 38.6 (4)   | C7B—N4B—C16B—C17B | 81.5 (5)   |
| C16A—N4A—C8A—C9A  | 78.2 (4)   | Zr2—N4B—C16B—C17B | -39.1 (4)  |
| C7A—N4A—C8A—C9A   | -163.3 (3) | Zr2—O7B—C17B—O8B  | -173.4 (4) |
| Zr1—N4A—C8A—C9A   | -37.2 (4)  | Zr2—O7B—C17B—C16B | 6.9 (6)    |
| N4A—C8A—C9A—N1A   | 60.7 (4)   | N4B—C16B—C17B—O8B | -153.1 (5) |
| C1A—N1A—C9A—C8A   | 82.7 (4)   | N4B—C16B—C17B—O7B | 26.6 (6)   |
| C10A—N1A—C9A—C8A  | -161.3 (3) | C9C—N1C—C1C—C2C   | -157.5 (4) |
| Zr1—N1A—C9A—C8A   | -51.9 (4)  | C10C—N1C—C1C—C2C  | 88.7 (5)   |
| C1A—N1A—C10A—C11A | -167.9 (3) | Zr3—N1C—C1C—C2C   | -31.6 (5)  |

|                   |            |                   |            |
|-------------------|------------|-------------------|------------|
| C9A—N1A—C10A—C11A | 77.3 (4)   | N1C—C1C—C2C—C3C   | 69.5 (5)   |
| Zr1—N1A—C10A—C11A | -35.0 (4)  | C4C—N2C—C3C—C2C   | -177.5 (4) |
| Zr1—O1A—C11A—O2A  | -149.9 (4) | C12C—N2C—C3C—C2C  | -60.9 (5)  |
| Zr1—O1A—C11A—C10A | 30.5 (5)   | Zr3—N2C—C3C—C2C   | 58.6 (4)   |
| N1A—C10A—C11A—O2A | -168.7 (4) | C1C—C2C—C3C—N2C   | -89.9 (5)  |
| N1A—C10A—C11A—O1A | 10.8 (5)   | C12C—N2C—C4C—C5C  | 158.6 (4)  |
| C4A—N2A—C12A—C13A | -149.8 (4) | C3C—N2C—C4C—C5C   | -84.3 (4)  |
| C3A—N2A—C12A—C13A | 93.7 (4)   | Zr3—N2C—C4C—C5C   | 42.0 (4)   |
| Zr1—N2A—C12A—C13A | -30.2 (4)  | C14C—N3C—C5C—C4C  | -73.8 (4)  |
| Zr1—O3A—C13A—O4A  | -178.0 (3) | C6C—N3C—C5C—C4C   | 167.3 (4)  |
| Zr1—O3A—C13A—C12A | 0.8 (5)    | Zr3—N3C—C5C—C4C   | 43.7 (4)   |
| N2A—C12A—C13A—O4A | -158.9 (4) | N2C—C4C—C5C—N3C   | -58.6 (5)  |
| N2A—C12A—C13A—O3A | 22.2 (6)   | C14C—N3C—C6C—C7C  | 163.9 (4)  |
| C6A—N3A—C14A—C15A | -152.5 (4) | C5C—N3C—C6C—C7C   | -77.0 (4)  |
| C5A—N3A—C14A—C15A | 88.9 (4)   | Zr3—N3C—C6C—C7C   | 45.1 (4)   |
| Zr1—N3A—C14A—C15A | -30.2 (4)  | C8C—N4C—C7C—C6C   | 165.2 (4)  |
| Zr1—O5A—C15A—O6A  | 178.4 (3)  | C16C—N4C—C7C—C6C  | -76.7 (4)  |
| Zr1—O5A—C15A—C14A | -2.9 (5)   | Zr3—N4C—C7C—C6C   | 38.4 (4)   |
| N3A—C14A—C15A—O6A | -156.6 (4) | N3C—C6C—C7C—N4C   | -55.3 (5)  |
| N3A—C14A—C15A—O5A | 24.6 (5)   | C7C—N4C—C8C—C9C   | -163.1 (4) |
| C7A—N4A—C16A—C17A | 91.3 (5)   | C16C—N4C—C8C—C9C  | 78.8 (4)   |
| C8A—N4A—C16A—C17A | -151.4 (4) | Zr3—N4C—C8C—C9C   | -36.6 (4)  |
| Zr1—N4A—C16A—C17A | -29.9 (4)  | C10C—N1C—C9C—C8C  | -160.7 (4) |
| Zr1—O7A—C17A—O8A  | -157.8 (5) | C1C—N1C—C9C—C8C   | 83.3 (4)   |
| Zr1—O7A—C17A—C16A | 22.2 (6)   | Zr3—N1C—C9C—C8C   | -51.7 (4)  |
| N4A—C16A—C17A—O8A | -169.9 (5) | N4C—C8C—C9C—N1C   | 60.2 (4)   |
| N4A—C16A—C17A—O7A | 10.1 (6)   | C9C—N1C—C10C—C11C | 76.8 (4)   |
| C10B—N1B—C1B—C2B  | 87.9 (5)   | C1C—N1C—C10C—C11C | -168.2 (3) |
| C9B—N1B—C1B—C2B   | -158.2 (5) | Zr3—N1C—C10C—C11C | -35.8 (4)  |



|                  |            |                   |            |
|------------------|------------|-------------------|------------|
| Zr2—N1B—C1B—C2B  | -33.3 (6)  | Zr3—O1C—C11C—O2C  | -150.0 (4) |
| N1B—C1B—C2B—C3B  | 71.5 (6)   | Zr3—O1C—C11C—C10C | 29.8 (5)   |
| C12B—N2B—C3B—C2B | -65.6 (5)  | N1C—C10C—C11C—O2C | -168.3 (4) |
| C4B—N2B—C3B—C2B  | 177.9 (4)  | N1C—C10C—C11C—O1C | 11.9 (5)   |
| Zr2—N2B—C3B—C2B  | 53.4 (5)   | C4C—N2C—C12C—C13C | -150.0 (4) |
| C1B—C2B—C3B—N2B  | -86.2 (6)  | C3C—N2C—C12C—C13C | 93.3 (4)   |
| C3B—N2B—C4B—C5B  | -86.3 (5)  | Zr3—N2C—C12C—C13C | -30.9 (4)  |
| C12B—N2B—C4B—C5B | 157.5 (4)  | Zr3—O3C—C13C—O4C  | -178.8 (3) |
| Zr2—N2B—C4B—C5B  | 42.0 (5)   | Zr3—O3C—C13C—C12C | -0.5 (5)   |
| N2B—C4B—C5B—N3B  | -60.0 (5)  | N2C—C12C—C13C—O4C | -158.0 (4) |
| C14B—N3B—C5B—C4B | -72.3 (5)  | N2C—C12C—C13C—O3C | 23.7 (6)   |
| C6B—N3B—C5B—C4B  | 168.7 (4)  | C6C—N3C—C14C—C15C | -151.4 (4) |
| Zr2—N3B—C5B—C4B  | 45.5 (4)   | C5C—N3C—C14C—C15C | 89.8 (4)   |
| C14B—N3B—C6B—C7B | 162.2 (4)  | Zr3—N3C—C14C—C15C | -29.5 (4)  |
| C5B—N3B—C6B—C7B  | -77.8 (5)  | Zr3—O5C—C15C—O6C  | -180.0 (3) |
| Zr2—N3B—C6B—C7B  | 43.8 (5)   | Zr3—O5C—C15C—C14C | -1.5 (5)   |
| N3B—C6B—C7B—N4B  | -51.7 (6)  | N3C—C14C—C15C—O6C | -158.3 (4) |
| C8B—N4B—C7B—C6B  | 163.3 (4)  | N3C—C14C—C15C—O5C | 23.2 (5)   |
| C16B—N4B—C7B—C6B | -78.2 (5)  | C8C—N4C—C16C—C17C | -152.5 (4) |
| Zr2—N4B—C7B—C6B  | 34.4 (5)   | C7C—N4C—C16C—C17C | 90.5 (4)   |
| C16B—N4B—C8B—C9B | 78.1 (5)   | Zr3—N4C—C16C—C17C | -30.7 (4)  |
| C7B—N4B—C8B—C9B  | -163.8 (4) | Zr3—O7C—C17C—O8C  | -159.1 (4) |
| Zr2—N4B—C8B—C9B  | -35.4 (5)  | Zr3—O7C—C17C—C16C | 20.2 (5)   |
| N4B—C8B—C9B—N1B  | 57.2 (6)   | N4C—C16C—C17C—O8C | -168.7 (4) |
| C10B—N1B—C9B—C8B | -159.2 (4) | N4C—C16C—C17C—O7C | 12.0 (6)   |
| C1B—N1B—C9B—C8B  | 83.6 (5)   |                   |            |
| Zr2—N1B—C9B—C8B  | -49.3 (5)  |                   |            |

**Table S5. Hydrogen-bond geometry (Å, °)**

| <i>D</i> —H... <i>A</i>      | <i>D</i> —H | H... <i>A</i> | <i>D</i> ... <i>A</i> | <i>D</i> —H... <i>A</i> |
|------------------------------|-------------|---------------|-----------------------|-------------------------|
| O1—H11...O8A <sup>i</sup>    | 0.82 (1)    | 1.95 (2)      | 2.755 (6)             | 170 (5)                 |
| O1—H12...O4B <sup>ii</sup>   | 0.82 (1)    | 2.00 (3)      | 2.782 (6)             | 159 (7)                 |
| O2—H21...O1                  | 0.83 (2)    | 2.06 (2)      | 2.881 (7)             | 171 (7)                 |
| O2—H22...O2B <sup>ii</sup>   | 0.82 (2)    | 2.05 (2)      | 2.865 (6)             | 171 (7)                 |
| O3—H31...O4                  | 0.81 (2)    | 1.88 (2)      | 2.685 (6)             | 170 (8)                 |
| O3—H32...O6A <sup>i</sup>    | 0.81 (1)    | 1.93 (2)      | 2.736 (5)             | 174 (5)                 |
| O4—H41...O5 <sup>iii</sup>   | 0.82 (2)    | 1.94 (3)      | 2.733 (6)             | 160 (9)                 |
| O4—H42...O4A <sup>iv</sup>   | 0.82 (2)    | 1.96 (2)      | 2.760 (5)             | 166 (6)                 |
| O5—H51...O3                  | 0.81 (1)    | 1.97 (2)      | 2.772 (6)             | 170 (4)                 |
| O5—H52...O10 <sup>v</sup>    | 0.82 (1)    | 1.95 (2)      | 2.769 (6)             | 177 (6)                 |
| O6—H61...O8C                 | 0.82 (2)    | 1.93 (2)      | 2.740 (5)             | 173 (7)                 |
| O6—H62...O8B <sup>iii</sup>  | 0.81 (1)    | 2.02 (2)      | 2.824 (6)             | 169 (7)                 |
| O7—H71...O6 <sup>i</sup>     | 0.83 (1)    | 2.08 (3)      | 2.881 (7)             | 163 (8)                 |
| O7—H72...O6B                 | 0.82 (2)    | 2.06 (2)      | 2.886 (6)             | 179 (7)                 |
| O8—H81...O10                 | 0.81 (2)    | 1.98 (2)      | 2.775 (6)             | 165 (6)                 |
| O8—H82...O3 <sup>vi</sup>    | 0.82 (1)    | 1.97 (2)      | 2.764 (6)             | 166 (7)                 |
| O9—H91...O8                  | 0.83 (1)    | 1.90 (2)      | 2.715 (6)             | 170 (5)                 |
| O9—H92...O4C <sup>vii</sup>  | 0.82 (1)    | 1.93 (2)      | 2.754 (6)             | 175 (6)                 |
| O10—H101...O6C               | 0.81 (1)    | 1.94 (2)      | 2.745 (5)             | 170 (5)                 |
| O10—H102...O9 <sup>iii</sup> | 0.82 (2)    | 1.91 (3)      | 2.699 (6)             | 163 (8)                 |

Symmetry codes: (i)  $x, y-1, z$ ; (ii)  $x-1/2, y+1/2, z$ ; (iii)  $x, y+1, z$ ; (iv)  $x-1/2, y-1/2, z$ ; (v)  $x, -y+2, z+1/2$ ; (vi)  $x, -y+2, z-1/2$ ; (vii)  $x+1/2, y-1/2, z$ .

**Least-squares planes (x,y,z in crystal coordinates) and deviations from them (\* indicates atom used to define plane)**

$$0.9419 (0.0224) x + 6.7776 (0.0020) y - 12.1401 (0.0530) z = 0.9781 (0.0496)$$

\* 0.1240 (0.0015) O1A

\* -0.1211 (0.0015) O3A

\* 0.1163 (0.0014) O5A

\* -0.1192 (0.0015) O7A

-1.0259 (0.0015) Zr1

-2.2041 (0.0046) N1A

-2.3020 (0.0044) N2A

-2.1551 (0.0045) N3A

-2.5963 (0.0042) N4A

Rms deviation of fitted atoms = 0.1202

$$- 1.1167 (0.0222) x - 6.6504 (0.0027) y + 15.3003 (0.0578) z = 4.2197 (0.0581)$$

Angle to previous plane (with approximate esd) = 3.785 (0.087)

\* -0.1315 (0.0016) N1A

\* 0.1273 (0.0015) N2A

\* -0.1540 (0.0018) N3A

\* 0.1582 (0.0019) N4A

-1.2851 (0.0017) Zr1

-2.5070 (0.0039) O1A

-2.0899 (0.0043) O3A

-2.3459 (0.0039) O5A

-2.2898 (0.0040) O7A

Rms deviation of fitted atoms = 0.1434

$$- 0.7072 (0.0240) x + 6.9685 (0.0009) y - 2.9665 (0.0656) z = 0.5485 (0.0507)$$

Angle to previous plane (with approximate esd) = 14.797 (0.070)

$$* -0.1138 (0.0014) O1B$$

$$* 0.1126 (0.0014) O3B$$

$$* -0.1103 (0.0014) O5B$$

$$* 0.1116 (0.0014) O7B$$

$$1.0360 (0.0014) Zr2$$

$$2.2000 (0.0051) N1B$$

$$2.2925 (0.0049) N2B$$

$$2.1717 (0.0049) N3B$$

$$2.5748 (0.0048) N4B$$

Rms deviation of fitted atoms = 0.1121

$$0.4842 (0.0279) x + 6.9620 (0.0010) y - 4.3223 (0.0623) z = 3.0083 (0.0498)$$

Angle to previous plane (with approximate esd) = 3.676 (0.030)

$$* -0.1207 (0.0018) N1B$$

$$* 0.1176 (0.0018) N2B$$

$$* -0.1407 (0.0021) N3B$$

$$* 0.1438 (0.0022) N4B$$

$$-1.2693 (0.0019) Zr2$$

$$-2.4853 (0.0042) O1B$$

$$-2.0945 (0.0046) O3B$$

$$-2.3433 (0.0041) O5B$$

$$-2.2898 (0.0043) O7B$$

Rms deviation of fitted atoms = 0.1312

$$- 0.7622 (0.0214) x + 6.7766 (0.0019) y + 12.1758 (0.0519) z = 14.1519 (0.0288)$$

Angle to previous plane (with approximate esd) = 19.143 (0.049)

$$* 0.1226 (0.0015) \text{ O1C}$$

$$* -0.1195 (0.0015) \text{ O3C}$$

$$* 0.1149 (0.0014) \text{ O5C}$$

$$* -0.1180 (0.0015) \text{ O7C}$$

$$-1.0270 (0.0015) \text{ Zr3}$$

$$-2.2074 (0.0044) \text{ N1C}$$

$$-2.3131 (0.0044) \text{ N2C}$$

$$-2.1569 (0.0045) \text{ N3C}$$

$$-2.5896 (0.0041) \text{ N4C}$$

Rms deviation of fitted atoms = 0.1188

$$- 0.9408 (0.0219) x + 6.6587 (0.0026) y + 15.1199 (0.0565) z = 13.3718 (0.0336)$$

Angle to previous plane (with approximate esd) = 3.524 (0.085)

$$* 0.1312 (0.0016) \text{ N1C}$$

$$* -0.1265 (0.0015) \text{ N2C}$$

$$* 0.1530 (0.0018) \text{ N3C}$$

$$* -0.1577 (0.0019) \text{ N4C}$$

$$1.2864 (0.0017) \text{ Zr3}$$

$$2.5042 (0.0037) \text{ O1C}$$

$$2.1027 (0.0042) \text{ O3C}$$

$$2.3521 (0.0040) \text{ O5C}$$

$$2.2854 (0.0039) \text{ O7C}$$

Rms deviation of fitted atoms = 0.1428

## Crystal Structure Analysis of Zr-PCTA, $[\text{Zr}(\text{C}_{17}\text{H}_{21}\text{N}_4\text{O}_6)]_2\text{O} \cdot 8 \text{H}_2\text{O}$

### Crystallographic Experimental Details:

**Data Collection and Structure Solution.** A clear colourless plate-like specimen of  $[\text{Zr}(\text{C}_{17}\text{H}_{21}\text{N}_4\text{O}_6)]_2\text{O} \cdot 8 \text{H}_2\text{O}$ , approximate dimensions 0.030 mm x 0.098 mm x 0.460 mm, was used for the X-ray crystallographic analysis. The X-ray intensity data were measured on a Bruker APEX CCD system equipped with a graphite monochromator and a Mo K $\alpha$  sealed x-ray tube ( $\lambda = 0.71073 \text{ \AA}$ ). X-rays were provided by a fine-focus sealed x-ray tube operated at 50kV and 30mA.

The total exposure time was 18.65 hours. The frames were integrated with the Bruker SAINT Software<sup>1</sup> package using a narrow-frame algorithm. The integration of the data using a monoclinic unit cell yielded a total of 39,418 reflections to a maximum  $\theta$  angle of  $30.08^\circ$  (0.71  $\text{\AA}$  resolution), of which 6124 were independent (average redundancy 6.437, completeness = 99.2%,  $R_{\text{int}} = 4.67\%$ ,  $R_{\text{sig}} = 2.93\%$ ) and 5433 (88.72%) were greater than  $2\sigma(F^2)$ . The final cell constants of  $a = 26.632(4) \text{ \AA}$ ,  $b = 10.6634(17) \text{ \AA}$ ,  $c = 15.884(3) \text{ \AA}$ ,  $\beta = 111.098(2)^\circ$ , volume =  $4208.5(12) \text{ \AA}^3$ , are based upon the refinement of the XYZ-centroids of 9951 reflections above  $20 \sigma(I)$  with  $6.877^\circ < 2\theta < 60.06^\circ$ . Data were corrected for absorption effects using the multi-scan method (SADABS)<sup>2</sup>. The ratio of minimum to maximum apparent transmission was 0.895. The calculated minimum and maximum transmission coefficients (based on crystal size) are 0.7730 and 0.9830.

The structure was solved and refined using the Bruker SHELXTL Software Package<sup>3</sup>, using the space group C2/c, with  $Z = 4$  for the formula unit,  $\text{C}_{34}\text{H}_{58}\text{N}_8\text{O}_{21}\text{Zr}_2$ . The final model includes 4 "full" occupancy water molecules per asymmetric unit. The final structural model incorporated isotropic thermal parameters for all included hydrogen atoms. The hydrogen atoms of the PCTA ligand were included in the structural model as fixed atoms (using idealized  $\text{sp}^2$ - or  $\text{sp}^3$ -hybridized geometry and C-H bond lengths of 0.95 and 0.99  $\text{\AA}$ , respectively) "riding" on their respective carbon atoms. The isotropic thermal parameters for all PCTA hydrogen atoms were fixed at values 1.2 times the equivalent isotropic thermal parameter of the carbon atom to which they are covalently bonded. The isotropic thermal parameters of the water hydrogen atoms were allowed to refine independently. The final anisotropic full-matrix least-squares refinement on  $F^2$  with 326 variables converged at  $R_1 = 2.33\%$ , for the observed data and  $wR_2 = 6.33\%$  for all data. The goodness-of-fit was 1.057. The largest peak in the final difference electron density synthesis was  $0.529 \text{ e}^-/\text{\AA}^3$  and the largest hole was  $-0.309 \text{ e}^-/\text{\AA}^3$  with an RMS deviation

of  $0.074 \text{ e}^-/\text{\AA}^3$ . On the basis of the final model, the calculated density was  $1.732 \text{ g/cm}^3$  and  $F(000)$ , 2264  $\text{e}^-$ .

**Refinement Details.** Crystal data, data collection and structure refinement details are summarized in tables below.

**Computing details.** Data collection: Bruker *APEX3* v2016.1-0; cell refinement: Bruker *APEX3* v2016.1-0; data reduction: Bruker *APEX2* v2014.11-0; program(s) used to solve structure: *SHELXS97* (Sheldrick 2008); program(s) used to refine structure: *SHELXL2014* (Sheldrick, 2014); molecular graphics: Bruker *APEX2* v2014.11-0; software used to prepare material for publication: Bruker *APEX2* v2014.11-0<sup>1-6</sup>.

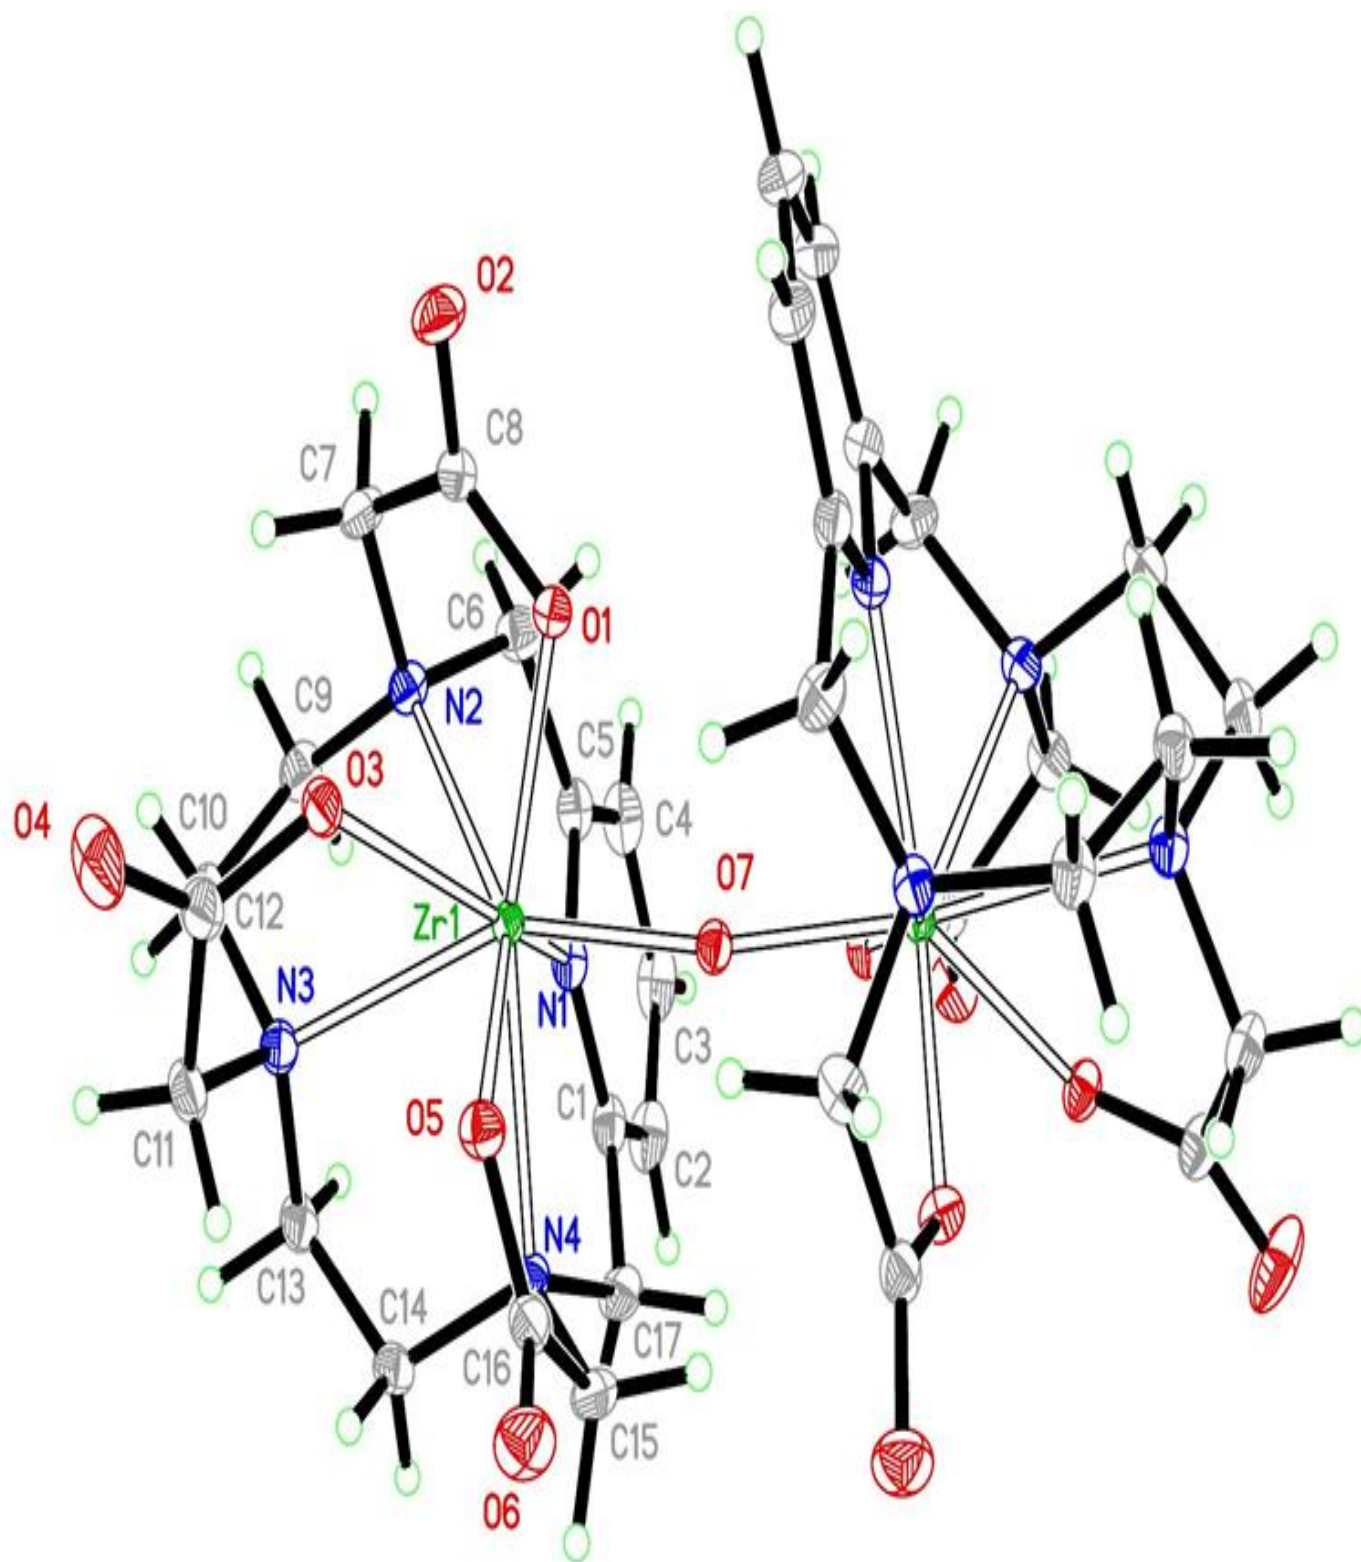

**Figure S31.** 50% probability plot for the dimeric unit of  $[\text{Zr}(\text{C}_{17}\text{H}_{21}\text{N}_4\text{O}_6)]_2\text{O} \cdot 8 \text{H}_2\text{O}$  with the water molecules omitted for clarity. The bridging oxygen atom, O<sub>7</sub>, lies on the crystallographic 2-fold axis at  $\frac{1}{2}, y, \frac{1}{4}$  in the unit cell and only the non-hydrogen atoms of the asymmetric unit are labeled.



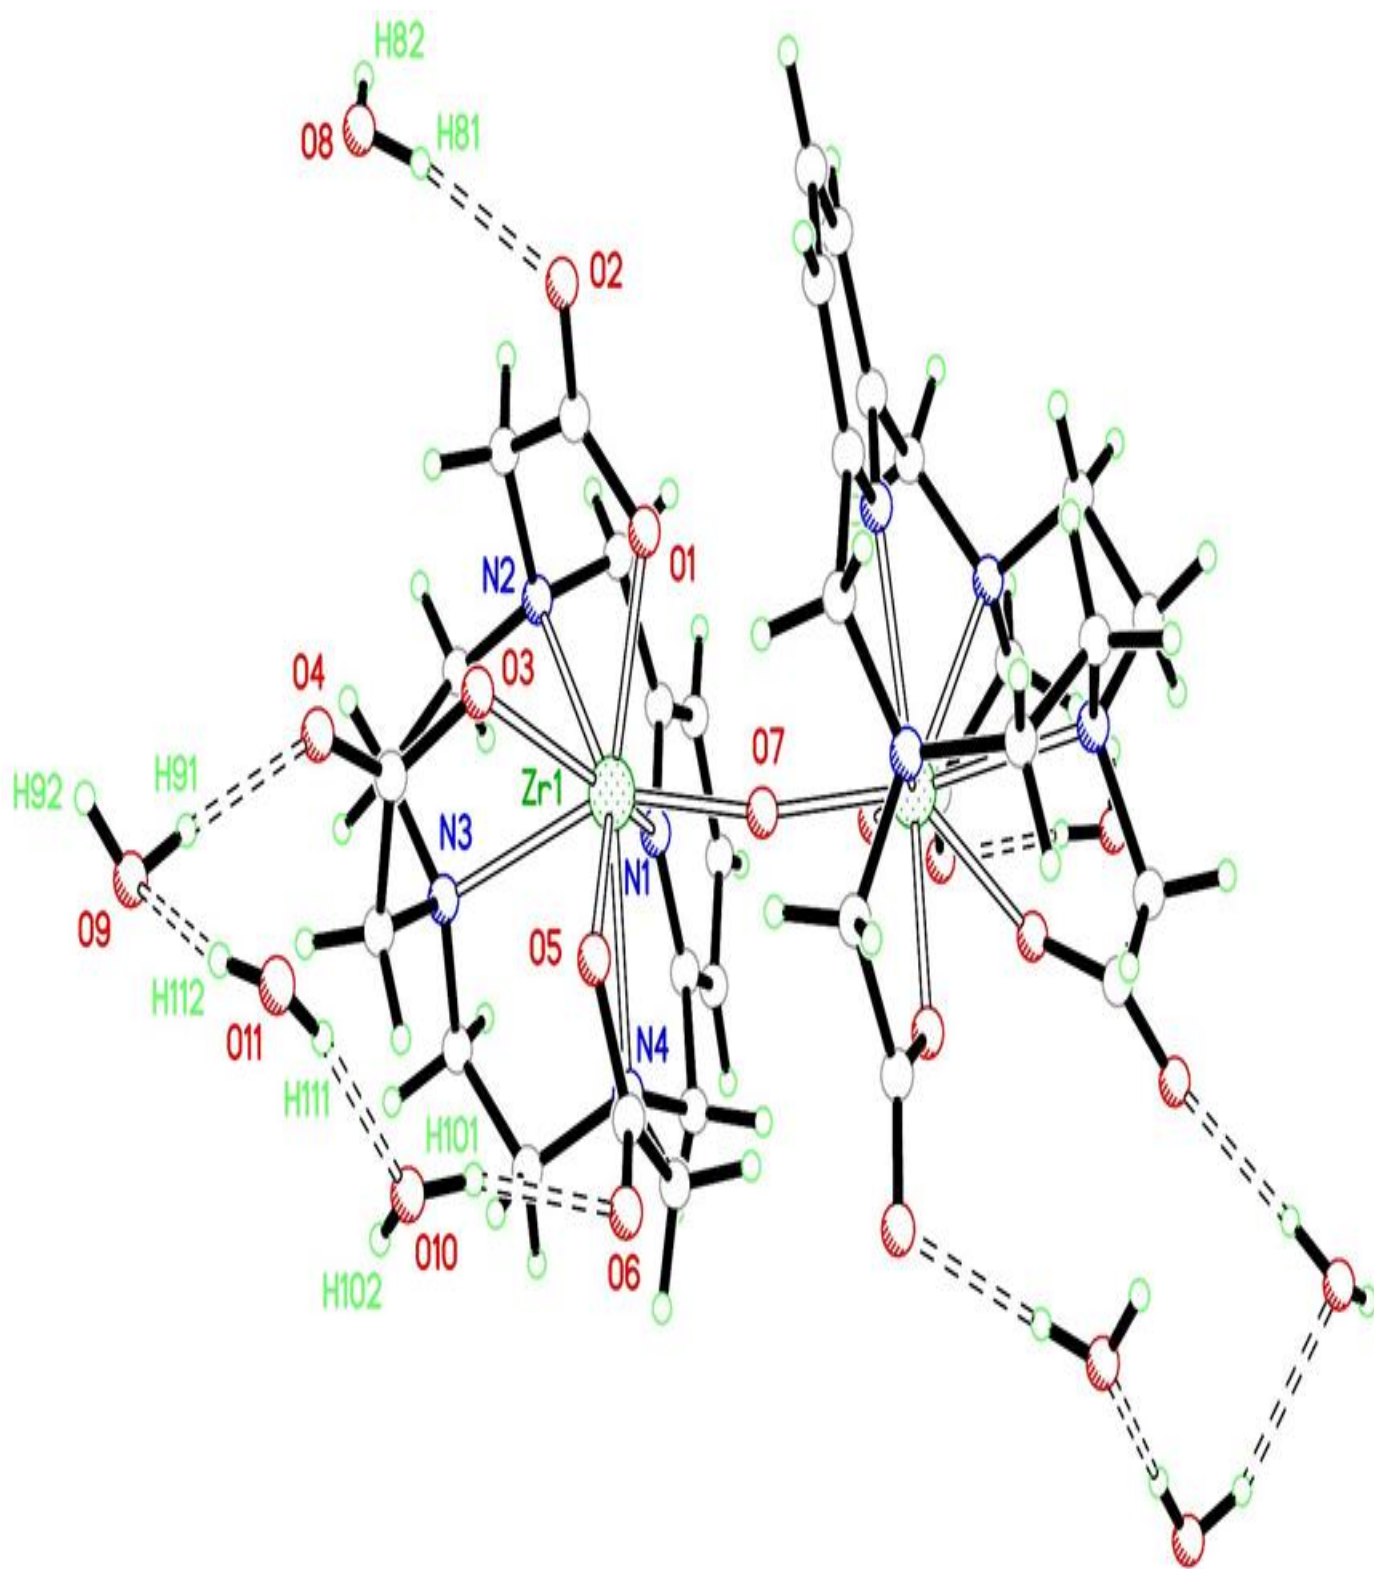

Figure S32. Plot of [Zr(C<sub>17</sub>H<sub>21</sub>N<sub>4</sub>O<sub>6</sub>)]<sub>2</sub>O · 8 H<sub>2</sub>O with all atoms represented by dummy-sized spheres and hydrogen-bonding interactions represented by dashed-open bonds.

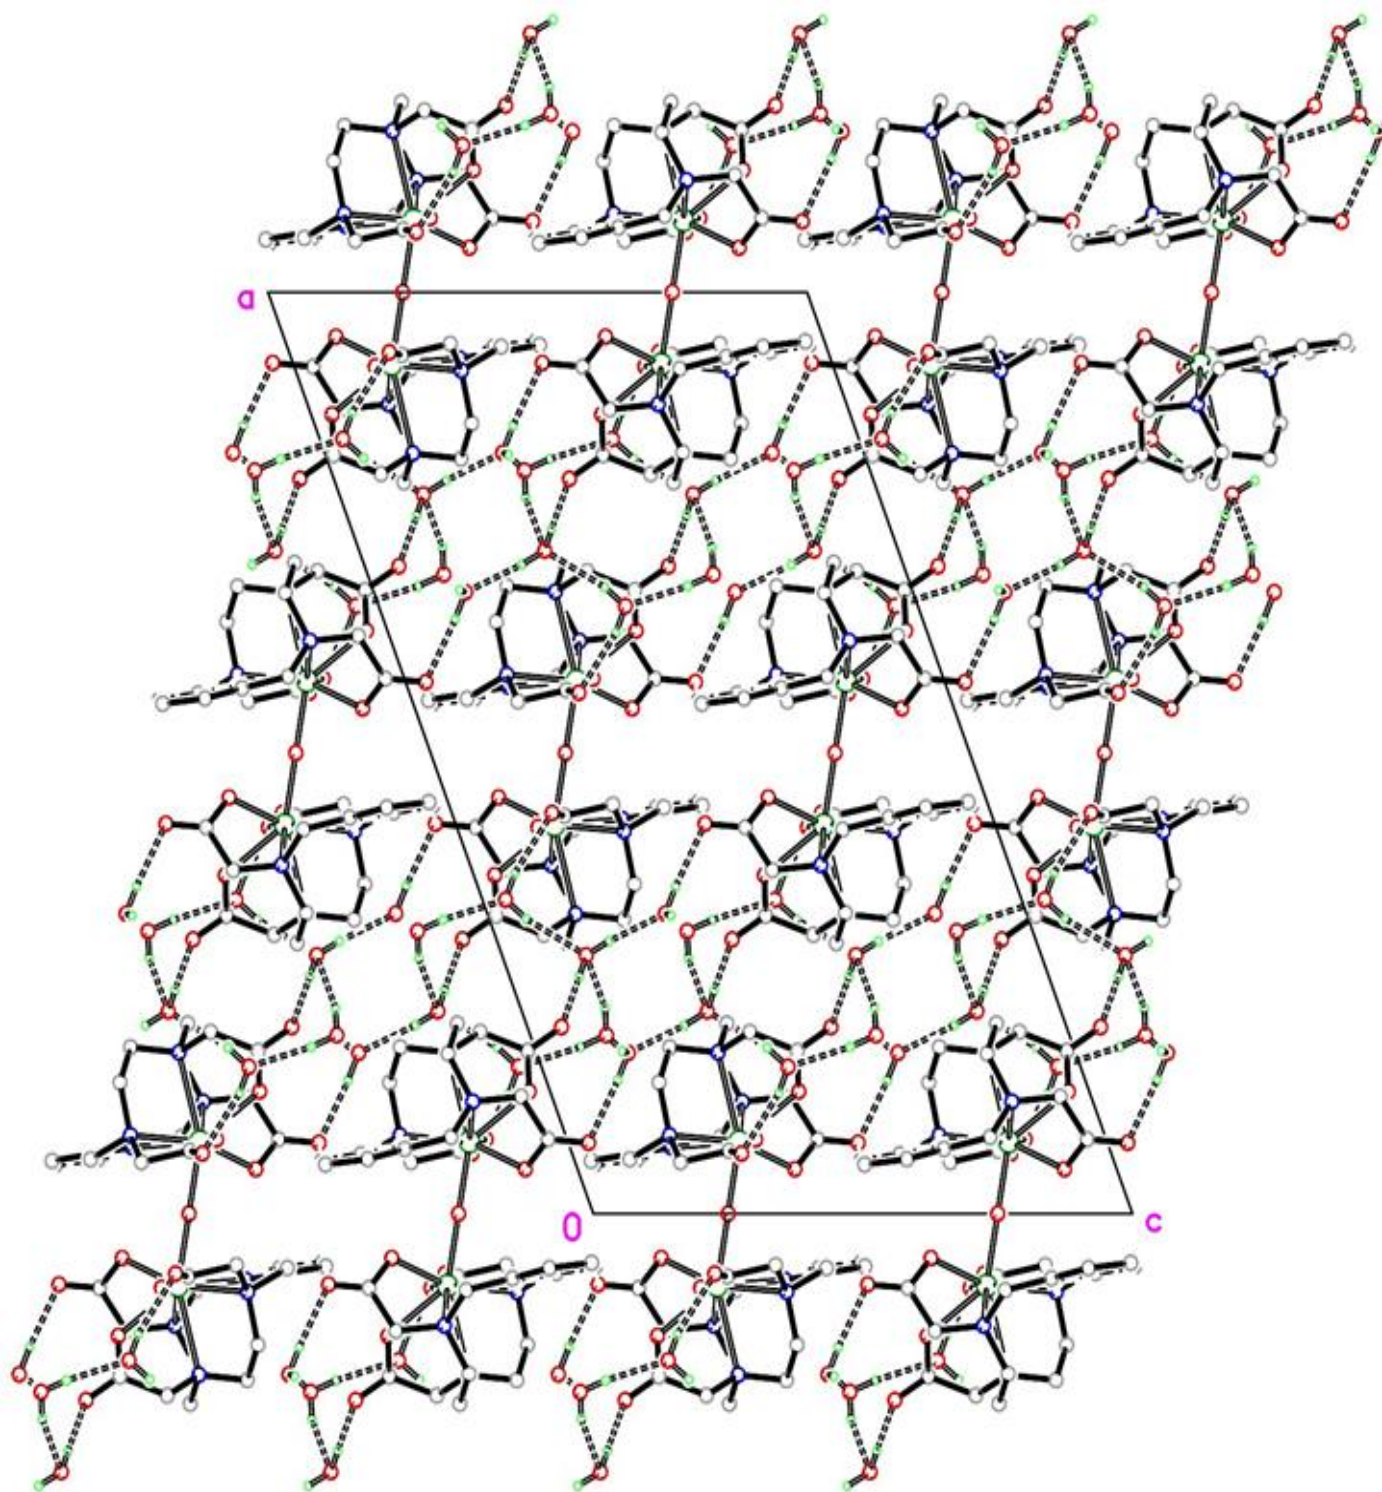

**Figure S33.** Packing plot of the solid-state structure of  $[\text{Zr}(\text{C}_{17}\text{H}_{21}\text{N}_4\text{O}_6)]_2\text{O} \cdot 8 \text{H}_2\text{O}$  viewed in projection down the *b* axis of the unit cell. All atoms are represented by dummy-sized spheres and non-water hydrogen atoms have been omitted for clarity. Hydrogen-bonding interactions represented by dashed-solid bonds.

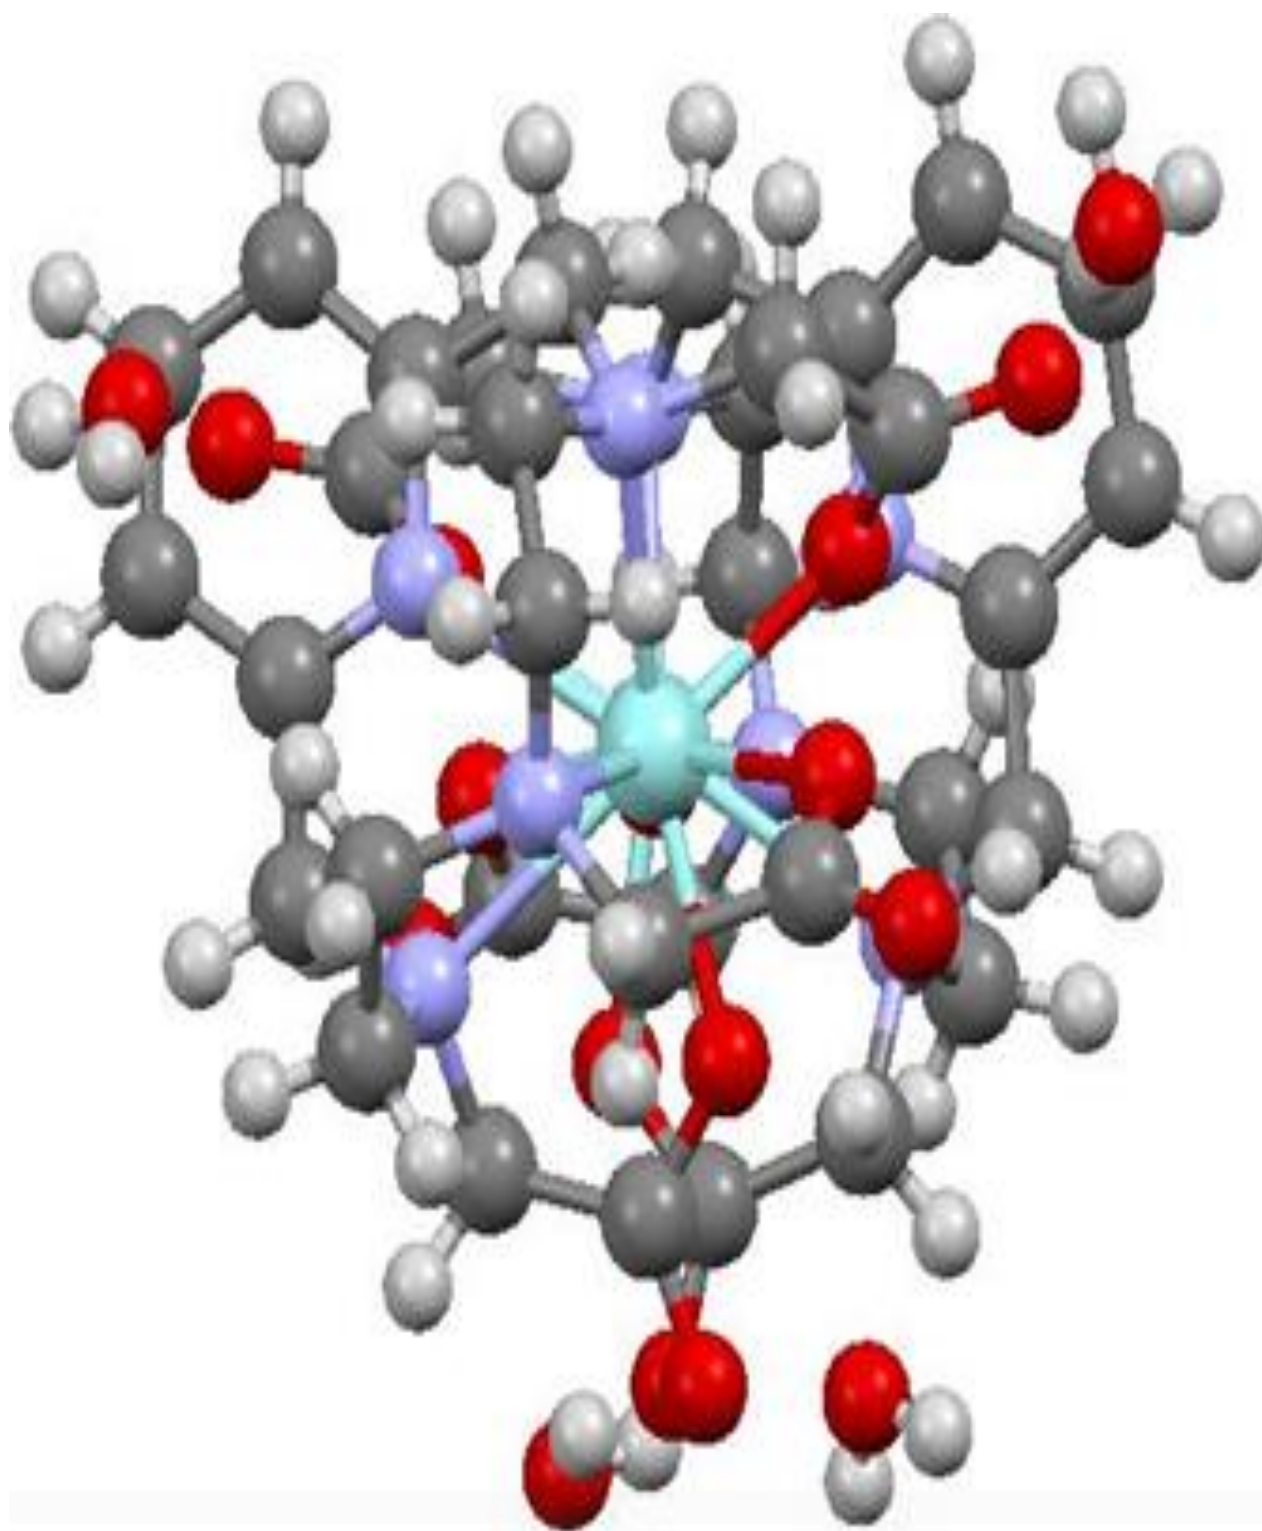

Figure S34. Plot of  $[\text{Zr}(\text{C}_{17}\text{H}_{21}\text{N}_4\text{O}_6)]_2\text{O} \cdot 8 \text{H}_2\text{O}$ , viewed down the Zr---Zr vector with all atoms represented by dummy-sized spheres.

**Table S6. Crystal structure data collection parameters****Crystal data**

|                                 |                                                         |
|---------------------------------|---------------------------------------------------------|
| $C_{34}H_{58}N_8O_{21}Zr_2$     | $F(000) = 2264$                                         |
| $M_r = 1097.32$                 | $D_x = 1.732 \text{ Mg m}^{-3}$                         |
| Monoclinic, $C2/c$              | Mo $K\alpha$ radiation, $\lambda = 0.71073 \text{ \AA}$ |
| $a = 26.632 (4) \text{ \AA}$    | Cell parameters from 9951 reflections                   |
| $b = 10.6634 (17) \text{ \AA}$  | $\theta = 3.4\text{--}30.0^\circ$                       |
| $c = 15.884 (3) \text{ \AA}$    | $\mu = 0.59 \text{ mm}^{-1}$                            |
| $\beta = 111.098 (2)^\circ$     | $T = 193 \text{ K}$                                     |
| $V = 4208.6 (12) \text{ \AA}^3$ | Plate, colourless                                       |
| $Z = 4$                         | $0.46 \times 0.10 \times 0.03 \text{ mm}$               |

**Data collection**

|                                                                                                                                                                                                                                                                                                              |                                                                        |
|--------------------------------------------------------------------------------------------------------------------------------------------------------------------------------------------------------------------------------------------------------------------------------------------------------------|------------------------------------------------------------------------|
| Bruker APEX CCD diffractometer                                                                                                                                                                                                                                                                               | 6124 independent reflections                                           |
| Radiation source: sealed tube                                                                                                                                                                                                                                                                                | 5433 reflections with $I > 2\sigma(I)$                                 |
| Graphite monochromator                                                                                                                                                                                                                                                                                       | $R_{\text{int}} = 0.047$                                               |
| $\phi$ and $\omega$ scans                                                                                                                                                                                                                                                                                    | $\theta_{\text{max}} = 30.1^\circ$ , $\theta_{\text{min}} = 3.4^\circ$ |
| Absorption correction: multi-scan Data were corrected for scaling and absorption effects using the multi-scan technique (SADABS). The ratio of minimum to maximum apparent transmission was 0.895. The calculated minimum and maximum transmission coefficients (based on crystal size) are 0.773 and 0.983. | $h = -37 \rightarrow 37$                                               |
| $T_{\text{min}} = 0.667$ , $T_{\text{max}} = 0.746$                                                                                                                                                                                                                                                          | $k = -14 \rightarrow 14$                                               |
| 39418 measured reflections                                                                                                                                                                                                                                                                                   | $l = -22 \rightarrow 22$                                               |

## Refinement

|                                 |                                                                                     |
|---------------------------------|-------------------------------------------------------------------------------------|
| Refinement on $F^2$             | 12 restraints                                                                       |
| Least-squares matrix: full      | Hydrogen site location: mixed                                                       |
| $R[F^2 > 2\sigma(F^2)] = 0.023$ | H atoms treated by a mixture of independent and constrained refinement              |
| $wR(F^2) = 0.063$               | $w = 1/[\sigma^2(F_o^2) + (0.0312P)^2 + 2.5169P]$<br>where $P = (F_o^2 + 2F_c^2)/3$ |
| $S = 1.06$                      | $(\Delta/\sigma)_{\max} = 0.002$                                                    |
| 6124 reflections                | $\Delta_{\max} = 0.53 \text{ e } \text{\AA}^{-3}$                                   |
| 326 parameters                  | $\Delta_{\min} = -0.31 \text{ e } \text{\AA}^{-3}$                                  |

## Special details

*Geometry.* All esds (except the esd in the dihedral angle between two l.s. planes) are estimated using the full covariance matrix. The cell esds are taken into account individually in the estimation of esds in distances, angles and torsion angles; correlations between esds in cell parameters are only used when they are defined by crystal symmetry. An approximate (isotropic) treatment of cell esds is used for estimating esds involving l.s. planes.



**Table S7. Fractional atomic coordinates and isotropic or equivalent isotropic displacement parameters (Å<sup>2</sup>)**

|     | x           | y            | z            | $U_{\text{iso}}^*/U_{\text{eq}}$ |
|-----|-------------|--------------|--------------|----------------------------------|
| Zr1 | 0.42185 (2) | 0.39753 (2)  | 0.18239 (2)  | 0.00952 (4)                      |
| O1  | 0.45174 (4) | 0.28434 (8)  | 0.09702 (6)  | 0.01517 (17)                     |
| O2  | 0.42315 (4) | 0.18849 (9)  | -0.03754 (7) | 0.0218 (2)                       |
| O3  | 0.36737 (4) | 0.42299 (8)  | 0.03892 (6)  | 0.01564 (18)                     |
| O4  | 0.29752 (5) | 0.51715 (12) | -0.06308 (7) | 0.0342 (3)                       |
| O5  | 0.41950 (4) | 0.59413 (8)  | 0.15041 (7)  | 0.01590 (18)                     |
| O6  | 0.43478 (5) | 0.79600 (9)  | 0.18580 (7)  | 0.0258 (2)                       |
| O7  | 0.5000      | 0.41805 (11) | 0.2500       | 0.0129 (2)                       |
| N1  | 0.42802 (4) | 0.27938 (10) | 0.31193 (7)  | 0.0141 (2)                       |
| N2  | 0.37848 (4) | 0.19029 (10) | 0.15047 (7)  | 0.0146 (2)                       |
| N3  | 0.32502 (4) | 0.41969 (10) | 0.16303 (7)  | 0.0147 (2)                       |
| N4  | 0.41500 (4) | 0.53215 (10) | 0.30742 (7)  | 0.0138 (2)                       |
| C1  | 0.43550 (5) | 0.33262 (12) | 0.39228 (9)  | 0.0162 (2)                       |
| C2  | 0.44272 (6) | 0.26188 (14) | 0.46930 (9)  | 0.0215 (3)                       |
| H2  | 0.4449      | 0.3014       | 0.5241       | 0.026*                           |
| C3  | 0.44668 (6) | 0.13323 (15) | 0.46466 (10) | 0.0241 (3)                       |
| H3  | 0.4533      | 0.0833       | 0.5171       | 0.029*                           |
| C4  | 0.44087 (6) | 0.07749 (13) | 0.38275 (10) | 0.0221 (3)                       |
| H4  | 0.4444      | -0.0107      | 0.3785       | 0.027*                           |
| C5  | 0.42986 (5) | 0.15307 (12) | 0.30748 (9)  | 0.0166 (2)                       |
| C6  | 0.41690 (6) | 0.10220 (11) | 0.21398 (10) | 0.0187 (3)                       |
| H6A | 0.4501      | 0.0954       | 0.1998       | 0.022*                           |
| H6B | 0.4006      | 0.0178       | 0.2090       | 0.022*                           |
| C7  | 0.37287 (6) | 0.15697 (12) | 0.05720 (9)  | 0.0176 (2)                       |
| H7A | 0.3383      | 0.1894       | 0.0144       | 0.021*                           |
| H7B | 0.3729      | 0.0646       | 0.0509       | 0.021*                           |
| C8  | 0.41929 (5) | 0.21323 (11) | 0.03532 (9)  | 0.0156 (2)                       |

|      |             |              |              |            |
|------|-------------|--------------|--------------|------------|
| C9   | 0.32621 (5) | 0.18499 (12) | 0.16450 (9)  | 0.0179 (2) |
| H9A  | 0.3329      | 0.1771       | 0.2297       | 0.021*     |
| H9B  | 0.3057      | 0.1104       | 0.1335       | 0.021*     |
| C10  | 0.29368 (5) | 0.30206 (12) | 0.12784 (9)  | 0.0182 (2) |
| H10A | 0.2816      | 0.3015       | 0.0612       | 0.022*     |
| H10B | 0.2612      | 0.3016       | 0.1444       | 0.022*     |
| C11  | 0.30270 (5) | 0.51515 (12) | 0.09072 (9)  | 0.0182 (2) |
| H11A | 0.3145      | 0.6001       | 0.1149       | 0.022*     |
| H11B | 0.2629      | 0.5126       | 0.0676       | 0.022*     |
| C12  | 0.32331 (6) | 0.48514 (12) | 0.01498 (9)  | 0.0182 (2) |
| C13  | 0.31933 (5) | 0.45841 (12) | 0.24909 (9)  | 0.0169 (2) |
| H13A | 0.3272      | 0.3862       | 0.2910       | 0.020*     |
| H13B | 0.2819      | 0.4856       | 0.2372       | 0.020*     |
| C14  | 0.35762 (5) | 0.56506 (12) | 0.29194 (9)  | 0.0169 (2) |
| H14A | 0.3472      | 0.6396       | 0.2523       | 0.020*     |
| H14B | 0.3544      | 0.5871       | 0.3504       | 0.020*     |
| C15  | 0.44408 (6) | 0.64965 (12) | 0.30442 (9)  | 0.0177 (2) |
| H15A | 0.4833      | 0.6369       | 0.3350       | 0.021*     |
| H15B | 0.4327      | 0.7173       | 0.3363       | 0.021*     |
| C16  | 0.43185 (5) | 0.68670 (11) | 0.20747 (9)  | 0.0163 (2) |
| C17  | 0.44095 (6) | 0.47195 (12) | 0.39679 (8)  | 0.0184 (3) |
| H17A | 0.4244      | 0.5050       | 0.4390       | 0.022*     |
| H17B | 0.4796      | 0.4943       | 0.4209       | 0.022*     |
| O8   | 0.32558 (5) | 0.09800 (12) | -0.17010 (9) | 0.0361 (3) |
| H81  | 0.3553 (5)  | 0.1162 (18)  | -0.1327 (12) | 0.043 (6)* |
| H82  | 0.3235 (10) | 0.0224 (10)  | -0.1609 (17) | 0.064 (8)* |
| O9   | 0.21960 (5) | 0.68121 (11) | -0.15600 (8) | 0.0306 (2) |
| H91  | 0.2423 (7)  | 0.6294 (17)  | -0.1299 (12) | 0.045 (6)* |
| H92  | 0.2044 (7)  | 0.6564 (18)  | -0.2071 (7)  | 0.034 (5)* |

|      |             |              |              |            |
|------|-------------|--------------|--------------|------------|
| O10  | 0.34067 (6) | 0.84749 (13) | 0.04255 (9)  | 0.0370 (3) |
| H101 | 0.3696 (5)  | 0.824 (2)    | 0.0776 (13)  | 0.054 (7)* |
| H102 | 0.3198 (7)  | 0.836 (2)    | 0.0690 (15)  | 0.057 (7)* |
| O11  | 0.30641 (5) | 0.84782 (12) | -0.14118 (9) | 0.0330 (3) |
| H111 | 0.3190 (8)  | 0.840 (2)    | -0.0863 (6)  | 0.043 (6)* |
| H112 | 0.2771 (5)  | 0.814 (2)    | -0.1565 (14) | 0.049 (7)* |

**Table S8. Atomic displacement parameters ( $\text{\AA}^2$ )**

|     | $U^{11}$    | $U^{22}$    | $U^{33}$    | $U^{12}$    | $U^{13}$    | $U^{23}$     |
|-----|-------------|-------------|-------------|-------------|-------------|--------------|
| Zr1 | 0.00958 (6) | 0.01080 (6) | 0.00801 (6) | 0.00027 (4) | 0.00296 (4) | -0.00017 (3) |
| O1  | 0.0130 (4)  | 0.0175 (4)  | 0.0151 (4)  | 0.0003 (3)  | 0.0051 (3)  | -0.0040 (3)  |
| O2  | 0.0247 (5)  | 0.0266 (5)  | 0.0160 (5)  | -0.0040 (4) | 0.0096 (4)  | -0.0071 (4)  |
| O3  | 0.0152 (5)  | 0.0196 (4)  | 0.0118 (4)  | 0.0037 (3)  | 0.0044 (4)  | 0.0007 (3)   |
| O4  | 0.0333 (6)  | 0.0523 (7)  | 0.0144 (5)  | 0.0219 (5)  | 0.0053 (5)  | 0.0083 (5)   |
| O5  | 0.0187 (5)  | 0.0141 (4)  | 0.0147 (5)  | 0.0014 (3)  | 0.0057 (4)  | 0.0009 (3)   |
| O6  | 0.0315 (6)  | 0.0151 (4)  | 0.0296 (6)  | -0.0015 (4) | 0.0093 (5)  | 0.0012 (4)   |
| O7  | 0.0120 (6)  | 0.0141 (5)  | 0.0120 (6)  | 0.000       | 0.0037 (5)  | 0.000        |
| N1  | 0.0128 (5)  | 0.0171 (5)  | 0.0127 (5)  | -0.0004 (4) | 0.0049 (4)  | 0.0021 (4)   |
| N2  | 0.0154 (5)  | 0.0155 (5)  | 0.0133 (5)  | -0.0019 (4) | 0.0055 (4)  | -0.0013 (4)  |
| N3  | 0.0134 (5)  | 0.0184 (5)  | 0.0127 (5)  | 0.0006 (4)  | 0.0052 (4)  | -0.0010 (4)  |
| N4  | 0.0135 (5)  | 0.0162 (5)  | 0.0118 (5)  | -0.0009 (4) | 0.0047 (4)  | -0.0015 (4)  |
| C1  | 0.0124 (6)  | 0.0227 (6)  | 0.0130 (6)  | 0.0003 (4)  | 0.0041 (5)  | 0.0017 (4)   |
| C2  | 0.0185 (7)  | 0.0334 (7)  | 0.0122 (6)  | -0.0025 (5) | 0.0050 (5)  | 0.0041 (5)   |
| C3  | 0.0200 (7)  | 0.0324 (7)  | 0.0176 (7)  | -0.0025 (5) | 0.0038 (5)  | 0.0113 (5)   |
| C4  | 0.0187 (7)  | 0.0220 (6)  | 0.0244 (7)  | -0.0004 (5) | 0.0064 (6)  | 0.0086 (5)   |
| C5  | 0.0144 (6)  | 0.0176 (6)  | 0.0173 (6)  | -0.0005 (4) | 0.0052 (5)  | 0.0034 (4)   |
| C6  | 0.0239 (7)  | 0.0129 (5)  | 0.0192 (7)  | 0.0020 (4)  | 0.0075 (5)  | 0.0014 (4)   |
| C7  | 0.0197 (6)  | 0.0181 (6)  | 0.0152 (6)  | -0.0038 (5) | 0.0064 (5)  | -0.0053 (4)  |
| C8  | 0.0156 (6)  | 0.0156 (5)  | 0.0148 (6)  | 0.0016 (4)  | 0.0047 (5)  | -0.0017 (4)  |



|     |            |            |            |             |             |             |
|-----|------------|------------|------------|-------------|-------------|-------------|
| C9  | 0.0169 (6) | 0.0200 (6) | 0.0181 (6) | -0.0055 (5) | 0.0082 (5)  | -0.0018 (5) |
| C10 | 0.0124 (6) | 0.0241 (6) | 0.0174 (6) | -0.0033 (5) | 0.0045 (5)  | -0.0033 (5) |
| C11 | 0.0158 (6) | 0.0229 (6) | 0.0148 (6) | 0.0065 (5)  | 0.0044 (5)  | 0.0015 (5)  |
| C12 | 0.0179 (6) | 0.0207 (6) | 0.0146 (6) | 0.0037 (5)  | 0.0044 (5)  | 0.0004 (4)  |
| C13 | 0.0139 (6) | 0.0239 (6) | 0.0148 (6) | 0.0008 (4)  | 0.0074 (5)  | -0.0010 (4) |
| C14 | 0.0159 (6) | 0.0205 (6) | 0.0159 (6) | 0.0025 (5)  | 0.0077 (5)  | -0.0028 (5) |
| C15 | 0.0204 (6) | 0.0158 (5) | 0.0184 (6) | -0.0034 (5) | 0.0088 (5)  | -0.0054 (4) |
| C16 | 0.0139 (6) | 0.0145 (5) | 0.0206 (6) | 0.0012 (4)  | 0.0064 (5)  | -0.0003 (4) |
| C17 | 0.0217 (7) | 0.0222 (6) | 0.0095 (6) | 0.0006 (5)  | 0.0035 (5)  | -0.0016 (4) |
| O8  | 0.0294 (7) | 0.0374 (7) | 0.0299 (7) | -0.0040 (5) | -0.0034 (5) | 0.0022 (5)  |
| O9  | 0.0272 (6) | 0.0316 (6) | 0.0269 (6) | 0.0093 (5)  | 0.0024 (5)  | 0.0008 (5)  |
| O10 | 0.0359 (7) | 0.0451 (7) | 0.0289 (7) | 0.0038 (6)  | 0.0103 (6)  | 0.0094 (5)  |
| O11 | 0.0315 (7) | 0.0420 (7) | 0.0271 (6) | -0.0052 (5) | 0.0125 (5)  | 0.0011 (5)  |

**Table S9. Geometric parameters (Å, °)**

|        |             |          |             |
|--------|-------------|----------|-------------|
| Zr1—O7 | 1.9809 (3)  | C4—H4    | 0.9500      |
| Zr1—O5 | 2.1527 (9)  | C5—C6    | 1.5000 (19) |
| Zr1—O1 | 2.1695 (9)  | C6—H6A   | 0.9900      |
| Zr1—O3 | 2.2343 (10) | C6—H6B   | 0.9900      |
| Zr1—N1 | 2.3674 (11) | C7—C8    | 1.5228 (18) |
| Zr1—N2 | 2.4603 (11) | C7—H7A   | 0.9900      |
| Zr1—N3 | 2.4959 (12) | C7—H7B   | 0.9900      |
| Zr1—N4 | 2.5097 (11) | C9—C10   | 1.5115 (19) |
| O1—C8  | 1.2932 (15) | C9—H9A   | 0.9900      |
| O2—C8  | 1.2269 (16) | C9—H9B   | 0.9900      |
| O3—C12 | 1.2805 (16) | C10—H10A | 0.9900      |
| O4—C12 | 1.2298 (17) | C10—H10B | 0.9900      |
| O5—C16 | 1.2998 (15) | C11—C12  | 1.5253 (18) |

|                     |             |            |             |
|---------------------|-------------|------------|-------------|
| O6—C16              | 1.2257 (16) | C11—H11A   | 0.9900      |
| O7—Zr1 <sup>i</sup> | 1.9810 (3)  | C11—H11B   | 0.9900      |
| N1—C1               | 1.3445 (17) | C13—C14    | 1.5154 (19) |
| N1—C5               | 1.3506 (16) | C13—H13A   | 0.9900      |
| N2—C7               | 1.4779 (16) | C13—H13B   | 0.9900      |
| N2—C6               | 1.4845 (17) | C14—H14A   | 0.9900      |
| N2—C9               | 1.4879 (16) | C14—H14B   | 0.9900      |
| N3—C13              | 1.4870 (16) | C15—C16    | 1.5076 (19) |
| N3—C11              | 1.4890 (17) | C15—H15A   | 0.9900      |
| N3—C10              | 1.4988 (17) | C15—H15B   | 0.9900      |
| N4—C15              | 1.4827 (16) | C17—H17A   | 0.9900      |
| N4—C17              | 1.4829 (17) | C17—H17B   | 0.9900      |
| N4—C14              | 1.4995 (17) | O8—H81     | 0.823 (9)   |
| C1—C2               | 1.3905 (18) | O8—H82     | 0.824 (9)   |
| C1—C17              | 1.4920 (19) | O9—H91     | 0.813 (9)   |
| C2—C3               | 1.380 (2)   | O9—H92     | 0.811 (9)   |
| C2—H2               | 0.9500      | O10—H101   | 0.811 (9)   |
| C3—C4               | 1.388 (2)   | O10—H102   | 0.816 (9)   |
| C3—H3               | 0.9500      | O11—H111   | 0.818 (9)   |
| C4—C5               | 1.3830 (18) | O11—H112   | 0.813 (9)   |
| O7—Zr1—O5           | 87.48 (4)   | N2—C6—C5   | 107.50 (10) |
| O7—Zr1—O1           | 81.37 (3)   | N2—C6—H6A  | 110.2       |
| O5—Zr1—O1           | 112.35 (4)  | C5—C6—H6A  | 110.2       |
| O7—Zr1—O3           | 135.18 (3)  | N2—C6—H6B  | 110.2       |
| O5—Zr1—O3           | 71.81 (4)   | C5—C6—H6B  | 110.2       |
| O1—Zr1—O3           | 71.32 (4)   | H6A—C6—H6B | 108.5       |
| O7—Zr1—N1           | 81.77 (3)   | N2—C7—C8   | 109.67 (10) |
| O5—Zr1—N1           | 135.27 (4)  | N2—C7—H7A  | 109.7       |
| O1—Zr1—N1           | 108.72 (4)  | C8—C7—H7A  | 109.7       |

|                         |             |               |             |
|-------------------------|-------------|---------------|-------------|
| O3—Zr1—N1               | 140.14 (4)  | N2—C7—H7B     | 109.7       |
| O7—Zr1—N2               | 122.32 (4)  | C8—C7—H7B     | 109.7       |
| O5—Zr1—N2               | 148.70 (4)  | H7A—C7—H7B    | 108.2       |
| O1—Zr1—N2               | 67.80 (4)   | O2—C8—O1      | 125.52 (12) |
| O3—Zr1—N2               | 79.32 (4)   | O2—C8—C7      | 118.76 (11) |
| N1—Zr1—N2               | 65.27 (4)   | O1—C8—C7      | 115.72 (11) |
| O7—Zr1—N3               | 153.34 (3)  | N2—C9—C10     | 110.38 (10) |
| O5—Zr1—N3               | 86.43 (4)   | N2—C9—H9A     | 109.6       |
| O1—Zr1—N3               | 124.82 (3)  | C10—C9—H9A    | 109.6       |
| O3—Zr1—N3               | 66.43 (4)   | N2—C9—H9B     | 109.6       |
| N1—Zr1—N3               | 84.43 (4)   | C10—C9—H9B    | 109.6       |
| N2—Zr1—N3               | 70.86 (4)   | H9A—C9—H9B    | 108.1       |
| O7—Zr1—N4               | 82.49 (3)   | N3—C10—C9     | 112.50 (11) |
| O5—Zr1—N4               | 68.01 (4)   | N3—C10—H10A   | 109.1       |
| O1—Zr1—N4               | 163.82 (4)  | C9—C10—H10A   | 109.1       |
| O3—Zr1—N4               | 122.15 (4)  | N3—C10—H10B   | 109.1       |
| N1—Zr1—N4               | 67.59 (4)   | C9—C10—H10B   | 109.1       |
| N2—Zr1—N4               | 120.96 (4)  | H10A—C10—H10B | 107.8       |
| N3—Zr1—N4               | 71.17 (4)   | N3—C11—C12    | 107.94 (10) |
| C8—O1—Zr1               | 120.30 (8)  | N3—C11—H11A   | 110.1       |
| C12—O3—Zr1              | 123.71 (8)  | C12—C11—H11A  | 110.1       |
| C16—O5—Zr1              | 126.62 (8)  | N3—C11—H11B   | 110.1       |
| Zr1—O7—Zr1 <sup>i</sup> | 167.32 (7)  | C12—C11—H11B  | 110.1       |
| C1—N1—C5                | 118.36 (11) | H11A—C11—H11B | 108.4       |
| C1—N1—Zr1               | 122.72 (8)  | O4—C12—O3     | 124.23 (13) |
| C5—N1—Zr1               | 118.53 (8)  | O4—C12—C11    | 120.54 (12) |
| C7—N2—C6                | 108.98 (10) | O3—C12—C11    | 115.20 (11) |
| C7—N2—C9                | 112.25 (10) | N3—C13—C14    | 110.28 (10) |
| C6—N2—C9                | 109.10 (10) | N3—C13—H13A   | 109.6       |

|            |             |               |             |
|------------|-------------|---------------|-------------|
| C7—N2—Zr1  | 107.05 (7)  | C14—C13—H13A  | 109.6       |
| C6—N2—Zr1  | 105.70 (7)  | N3—C13—H13B   | 109.6       |
| C9—N2—Zr1  | 113.48 (7)  | C14—C13—H13B  | 109.6       |
| C13—N3—C11 | 112.01 (10) | H13A—C13—H13B | 108.1       |
| C13—N3—C10 | 110.36 (10) | N4—C14—C13    | 112.29 (10) |
| C11—N3—C10 | 105.69 (10) | N4—C14—H14A   | 109.1       |
| C13—N3—Zr1 | 110.83 (8)  | C13—C14—H14A  | 109.1       |
| C11—N3—Zr1 | 105.52 (8)  | N4—C14—H14B   | 109.1       |
| C10—N3—Zr1 | 112.24 (8)  | C13—C14—H14B  | 109.1       |
| C15—N4—C17 | 109.13 (10) | H14A—C14—H14B | 107.9       |
| C15—N4—C14 | 108.08 (10) | N4—C15—C16    | 109.33 (10) |
| C17—N4—C14 | 110.76 (10) | N4—C15—H15A   | 109.8       |
| C15—N4—Zr1 | 105.69 (7)  | C16—C15—H15A  | 109.8       |
| C17—N4—Zr1 | 111.62 (7)  | N4—C15—H15B   | 109.8       |
| C14—N4—Zr1 | 111.36 (7)  | C16—C15—H15B  | 109.8       |
| N1—C1—C2   | 122.17 (12) | H15A—C15—H15B | 108.3       |
| N1—C1—C17  | 116.40 (11) | O6—C16—O5     | 123.51 (13) |
| C2—C1—C17  | 121.18 (12) | O6—C16—C15    | 121.59 (12) |
| C3—C2—C1   | 118.77 (13) | O5—C16—C15    | 114.88 (11) |
| C3—C2—H2   | 120.6       | N4—C17—C1     | 112.42 (10) |
| C1—C2—H2   | 120.6       | N4—C17—H17A   | 109.1       |
| C2—C3—C4   | 119.41 (13) | C1—C17—H17A   | 109.1       |
| C2—C3—H3   | 120.3       | N4—C17—H17B   | 109.1       |
| C4—C3—H3   | 120.3       | C1—C17—H17B   | 109.1       |
| C5—C4—C3   | 118.58 (13) | H17A—C17—H17B | 107.9       |
| C5—C4—H4   | 120.7       | H81—O8—H82    | 102.1 (17)  |
| C3—C4—H4   | 120.7       | H91—O9—H92    | 107.4 (17)  |
| N1—C5—C4   | 122.43 (13) | H101—O10—H102 | 104.9 (18)  |
| N1—C5—C6   | 114.38 (11) | H111—O11—H112 | 104.7 (17)  |

|               |              |                |              |
|---------------|--------------|----------------|--------------|
| C4—C5—C6      | 123.15 (12)  | C11—N3—C10—C9  | 150.29 (11)  |
| C5—N1—C1—C2   | -2.78 (19)   | Zr1—N3—C10—C9  | 35.76 (13)   |
| Zr1—N1—C1—C2  | -175.53 (10) | N2—C9—C10—N3   | -51.90 (14)  |
| C5—N1—C1—C17  | 171.55 (11)  | C13—N3—C11—C12 | 165.15 (11)  |
| Zr1—N1—C1—C17 | -1.20 (16)   | C10—N3—C11—C12 | -74.62 (13)  |
| N1—C1—C2—C3   | 5.4 (2)      | Zr1—N3—C11—C12 | 44.47 (11)   |
| C17—C1—C2—C3  | -168.69 (13) | Zr1—O3—C12—O4  | 167.64 (12)  |
| C1—C2—C3—C4   | -3.0 (2)     | Zr1—O3—C12—C11 | -14.25 (16)  |
| C2—C3—C4—C5   | -1.6 (2)     | N3—C11—C12—O4  | 153.59 (13)  |
| C1—N1—C5—C4   | -2.18 (19)   | N3—C11—C12—O3  | -24.60 (16)  |
| Zr1—N1—C5—C4  | 170.88 (10)  | C11—N3—C13—C14 | -71.27 (13)  |
| C1—N1—C5—C6   | 175.56 (12)  | C10—N3—C13—C14 | 171.26 (10)  |
| Zr1—N1—C5—C6  | -11.38 (15)  | Zr1—N3—C13—C14 | 46.29 (12)   |
| C3—C4—C5—N1   | 4.4 (2)      | C15—N4—C14—C13 | 152.02 (11)  |
| C3—C4—C5—C6   | -173.17 (13) | C17—N4—C14—C13 | -88.48 (13)  |
| C7—N2—C6—C5   | 169.20 (10)  | Zr1—N4—C14—C13 | 36.36 (12)   |
| C9—N2—C6—C5   | -67.92 (13)  | N3—C13—C14—N4  | -56.36 (14)  |
| Zr1—N2—C6—C5  | 54.44 (11)   | C17—N4—C15—C16 | 160.02 (10)  |
| N1—C5—C6—N2   | -30.48 (16)  | C14—N4—C15—C16 | -79.45 (12)  |
| C4—C5—C6—N2   | 147.25 (13)  | Zr1—N4—C15—C16 | 39.86 (11)   |
| C6—N2—C7—C8   | -82.07 (12)  | Zr1—O5—C16—O6  | 172.59 (10)  |
| C9—N2—C7—C8   | 156.95 (10)  | Zr1—O5—C16—C15 | -5.77 (16)   |
| Zr1—N2—C7—C8  | 31.81 (11)   | N4—C15—C16—O6  | 154.58 (12)  |
| Zr1—O1—C8—O2  | 147.14 (11)  | N4—C15—C16—O5  | -27.02 (15)  |
| Zr1—O1—C8—C7  | -32.89 (14)  | C15—N4—C17—C1  | -150.19 (11) |
| N2—C7—C8—O2   | 175.40 (11)  | C14—N4—C17—C1  | 90.95 (12)   |
| N2—C7—C8—O1   | -4.57 (15)   | Zr1—N4—C17—C1  | -33.74 (13)  |
| C7—N2—C9—C10  | -79.60 (13)  | N1—C1—C17—N4   | 24.35 (16)   |
| C6—N2—C9—C10  | 159.49 (10)  | C2—C1—C17—N4   | -161.26 (12) |

|               |             |  |  |
|---------------|-------------|--|--|
| Zr1—N2—C9—C10 | 41.93 (12)  |  |  |
| C13—N3—C10—C9 | -88.40 (13) |  |  |

Symmetry code: (i)  $-x+1, y, -z+1/2$ .

**Table S10. Hydrogen-bond geometry (Å, °)**

| <i>D</i> —H... <i>A</i>     | <i>D</i> —H | H... <i>A</i> | <i>D</i> ... <i>A</i> | <i>D</i> —H... <i>A</i> |
|-----------------------------|-------------|---------------|-----------------------|-------------------------|
| C2—H2...O5 <sup>ii</sup>    | 0.95        | 2.59          | 3.5066 (18)           | 163                     |
| C4—H4...O2 <sup>iii</sup>   | 0.95        | 2.50          | 3.2094 (17)           | 132                     |
| C6—H6B...O6 <sup>iv</sup>   | 0.99        | 2.61          | 3.3529 (16)           | 132                     |
| C7—H7B...O10 <sup>iv</sup>  | 0.99        | 2.46          | 3.396 (2)             | 158                     |
| C9—H9A...O11 <sup>ii</sup>  | 0.99        | 2.41          | 3.3316 (19)           | 155                     |
| C14—H14B...O4 <sup>ii</sup> | 0.99        | 2.63          | 3.3596 (18)           | 131                     |
| C15—H15A...O5 <sup>i</sup>  | 0.99        | 2.56          | 3.4912 (18)           | 158                     |
| C15—H15B...O2 <sup>ii</sup> | 0.99        | 2.34          | 3.2556 (17)           | 154                     |
| O8—H81...O2                 | 0.82 (1)    | 2.04 (1)      | 2.8598 (16)           | 171 (2)                 |
| O8—H82...O11 <sup>iv</sup>  | 0.82 (1)    | 1.97 (1)      | 2.7852 (18)           | 171 (2)                 |
| O9—H91...O4                 | 0.81 (1)    | 1.90 (1)      | 2.7093 (16)           | 176 (2)                 |
| O9—H92...O8 <sup>v</sup>    | 0.81 (1)    | 1.93 (1)      | 2.7335 (18)           | 175 (2)                 |
| O10—H101...O6               | 0.81 (1)    | 1.98 (1)      | 2.7669 (18)           | 164 (2)                 |
| O10—H102...O9 <sup>vi</sup> | 0.82 (1)    | 2.02 (1)      | 2.8285 (19)           | 169 (2)                 |
| O11—H111...O10              | 0.82 (1)    | 1.92 (1)      | 2.7262 (18)           | 170 (2)                 |
| O11—H112...O9               | 0.81 (1)    | 2.09 (1)      | 2.8574 (18)           | 158 (2)                 |

Symmetry codes: (i)  $-x+1, y, -z+1/2$ ; (ii)  $x, -y+1, z+1/2$ ; (iii)  $x, -y, z+1/2$ ; (iv)  $x, y-1, z$ ; (v)  $-x+1/2, y+1/2, -z-1/2$ ; (vi)  $-x+1/2, -y+3/2, -z$ .

**Least-squares planes (x,y,z in crystal coordinates) and deviations from them (\* indicates atom used to define plane)**

$$21.3519 (0.0087) x + 3.2726 (0.0041) y - 12.1847 (0.0048) z = 6.5766 (0.0038)$$

\* -0.3241 (0.0006) N1

\* 0.2939 (0.0006) N2

\* -0.2499 (0.0005) N3

\* 0.2802 (0.0005) N4

1.5091 (0.0006) Zr1

2.8172 (0.0013) O1

2.1775 (0.0015) O3

2.4921 (0.0014) O5

2.4212 (0.0011) O7

Rms deviation of fitted atoms = 0.2883

$$19.8900 (0.0061) x + 4.1453 (0.0038) y - 12.2662 (0.0037) z = 8.7824 (0.0028)$$

Angle to previous plane (with approximate esd) = 5.852 (0.053)

\* 0.1912 (0.0005) O1

\* -0.1994 (0.0005) O3

\* 0.1793 (0.0004) O5

\* -0.1711 (0.0004) O7

-0.9813 (0.0004) Zr1

-2.9373 (0.0012) N1

-2.3114 (0.0014) N2

-2.5779 (0.0014) N3

-2.0929 (0.0014) N4

Rms deviation of fitted atoms = 0.1855

## Crystal Structure Analysis of Zr-NOTA, $[\text{Zr}(\text{C}_{12}\text{H}_{18}\text{N}_3\text{O}_6)(\text{OH})_2]_2 \cdot 6 \text{H}_2\text{O}$

### Crystallographic Experimental Details:

**Data Collection and Structure Solution.** A clear colorless plate-like specimen of  $[\text{Zr}(\text{C}_{12}\text{H}_{18}\text{N}_3\text{O}_6)(\text{OH})_2]_2 \cdot 6 \text{H}_2\text{O}$ , approximate dimensions 0.080 mm x 0.300 mm x 0.460 mm, was used for the X-ray crystallographic analysis. The X-ray intensity data were measured on a Bruker APEX CCD system equipped with a graphite monochromator and a Mo  $K_\alpha$  sealed x-ray tube ( $\lambda = 0.71073 \text{ \AA}$ ). X-rays were provided by a fine-focus sealed x-ray tube operated at 50kV and 30mA.

The total exposure time was 18.73 hours. The frames were integrated with the Bruker SAINT Software<sup>1</sup> package using a narrow-frame algorithm. The integration of the data using a monoclinic unit cell yielded a total of 31714 reflections to a maximum  $\theta$  angle of  $30.50^\circ$  ( $0.70 \text{ \AA}$  resolution), of which 5078 were independent (average redundancy 6.245, completeness = 99.8%,  $R_{\text{int}} = 3.13\%$ ,  $R_{\text{sig}} = 1.83\%$ ) and 4778 (94.09%) were greater than  $2\sigma(F^2)$ . The final cell constants of  $a = 11.7960 (7) \text{ \AA}$ ,  $b = 10.9411 (6) \text{ \AA}$ ,  $c = 14.1815 (8) \text{ \AA}$ ,  $\beta = 114.2100 (10)^\circ$ , volume =  $1669.31 (16) \text{ \AA}^3$ , are based upon the refinement of the XYZ-centroids of 9847 reflections above  $20 \sigma(I)$  with  $7.32^\circ < 2\theta < 62.98^\circ$ . Data were corrected for absorption effects using the multi-scan method (SADABS)<sup>2</sup>. The ratio of minimum to maximum apparent transmission was 0.909. The calculated minimum and maximum transmission coefficients (based on crystal size) are 0.7330 and 0.9450.

The structure was solved and refined using the Bruker SHELXTL Software Package<sup>3</sup>, using the space group  $P2_1/n$ , with  $Z = 2$  for the formula unit,  $\text{C}_{24}\text{H}_{50}\text{N}_6\text{O}_{20}\text{Zr}_2$ . The final model includes 6 full-occupancy water molecules per dimeric unit. The arrangement of three CH<sub>2</sub> groups about nitrogen atom N3 shows a slight rotational disorder (93/7%) about the Zr-N3 bond. The carbon atoms for the major orientation are designated by carbons C8, C10 and C11 and their associated hydrogen atoms. The carbon atoms for the minor orientation are designated by carbons C8', C10' and C11' and their associated hydrogens. The final structural model incorporated isotropic thermal parameters for the carbon atoms of the minor orientation and for all included hydrogen atoms. The hydrogen atoms of the "NOTA" ligand were included in the structural model as fixed atoms (using idealized  $sp^3$ -hybridized geometry and C-H bond lengths of  $0.99 \text{ \AA}$ ) "riding" on their respective carbon atoms. The isotropic thermal parameters for all "NOTA" hydrogen atoms were fixed at values 1.2 times the equivalent isotropic thermal parameter of the carbon atom to which they are covalently bonded. The isotropic thermal parameters of the



water hydrogen atoms were allowed to refine independently. The final anisotropic full-matrix least-squares refinement on  $F^2$  with 276 variables converged at  $R_1 = 1.92\%$ , for the observed data and  $wR_2 = 5.18\%$  for all data. The goodness-of-fit was 1.030. The largest peak in the final difference electron density synthesis was  $0.521 \text{ e}/\text{\AA}^3$  and the largest hole was  $-0.240 \text{ e}/\text{\AA}^3$  with an RMS deviation of  $0.060 \text{ e}/\text{\AA}^3$ . On the basis of the final model, the calculated density was  $1.841 \text{ g}/\text{cm}^3$  and  $F(000)$ , 952 e $^-$ .

**Refinement Details.** Crystal data, data collection and structure refinement details are summarized in tables below.

**Computing details.** Data collection: Bruker *APEX3* v2016.1-0; cell refinement: Bruker *APEX3* v2016.1-0; data reduction: Bruker *APEX2* v2014.11-0; program(s) used to solve structure: *SHELXS97* (Sheldrick 2008); program(s) used to refine structure: *SHELXL2014* (Sheldrick, 2014); molecular graphics: Bruker *APEX2* v2014.11-0; software used to prepare material for publication: Bruker *APEX2* v2014.11-0<sup>1-6</sup>.

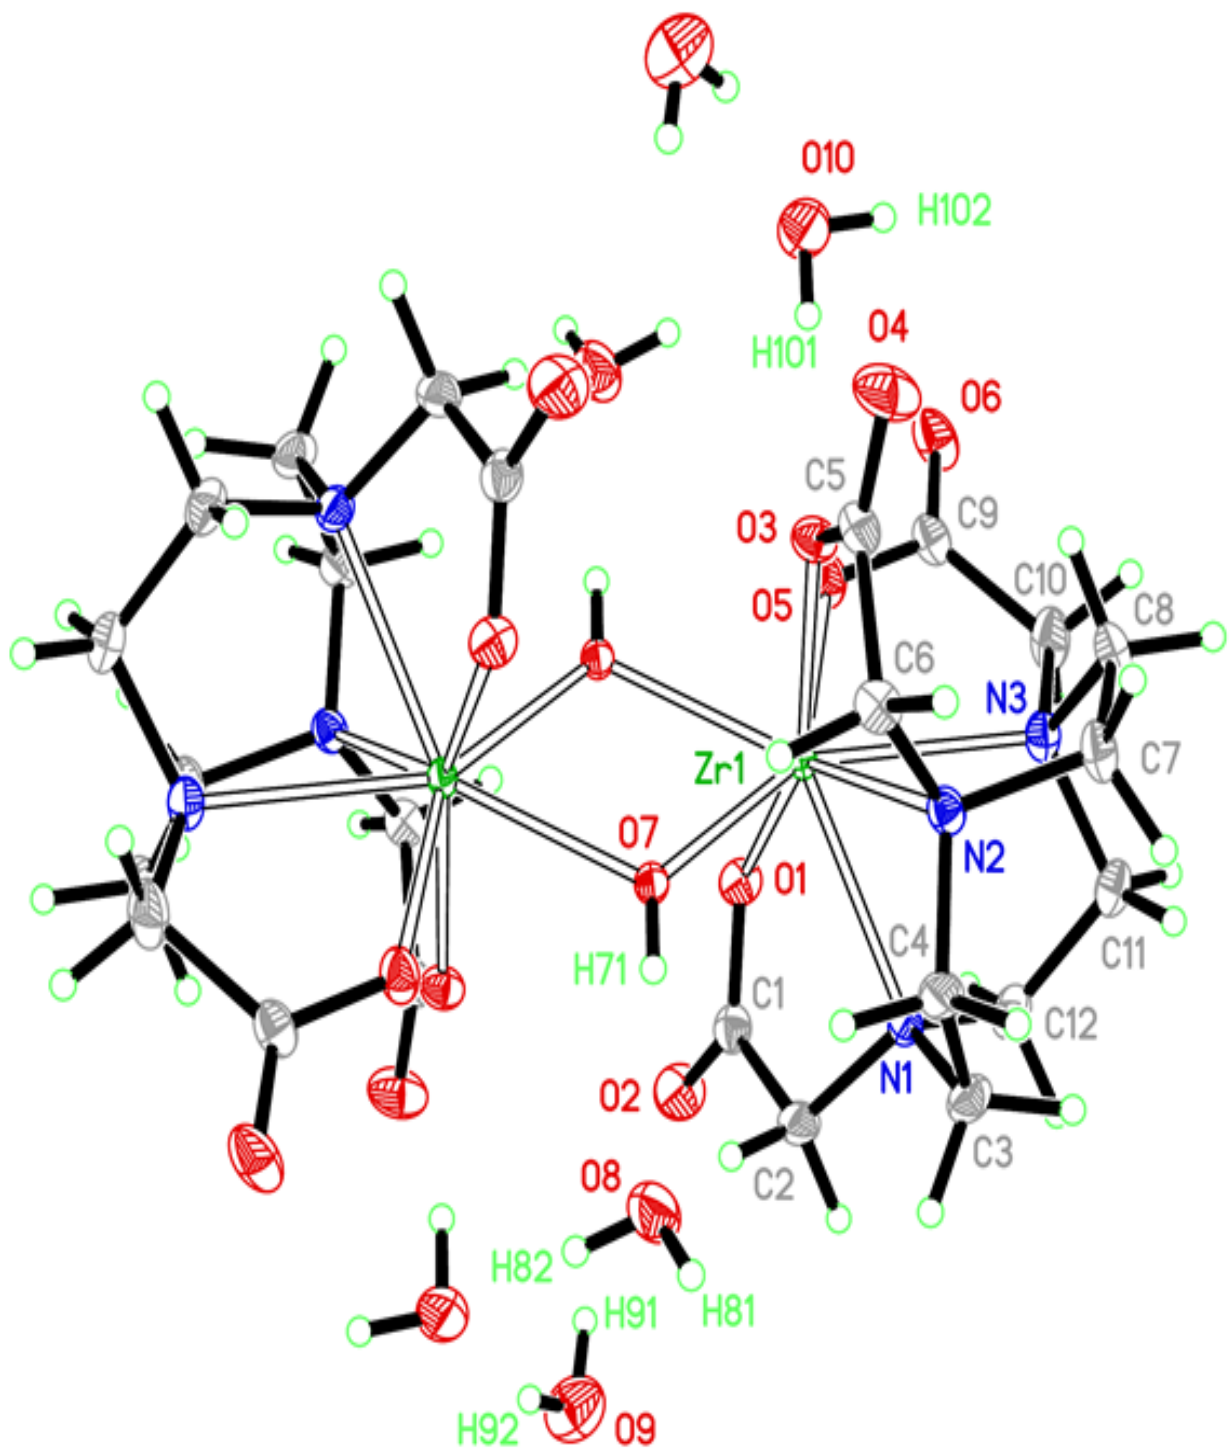

**Figure S35.** 50% probability plot for the dimeric unit of  $[\text{Zr}(\text{C}_{12}\text{H}_{18}\text{N}_3\text{O}_6)(\text{OH})]_2 \cdot 6 \text{H}_2\text{O}$  with disordered atoms  $\text{C}8'$ ,  $\text{C}10'$  and  $\text{C}11'$  omitted for clarity. The two halves of the dimer are related by the crystallographic inversion center at  $\frac{1}{2}, \frac{1}{2}, 0$  in the unit cell. Only the non-hydrogen atoms of the asymmetric unit are labeled.

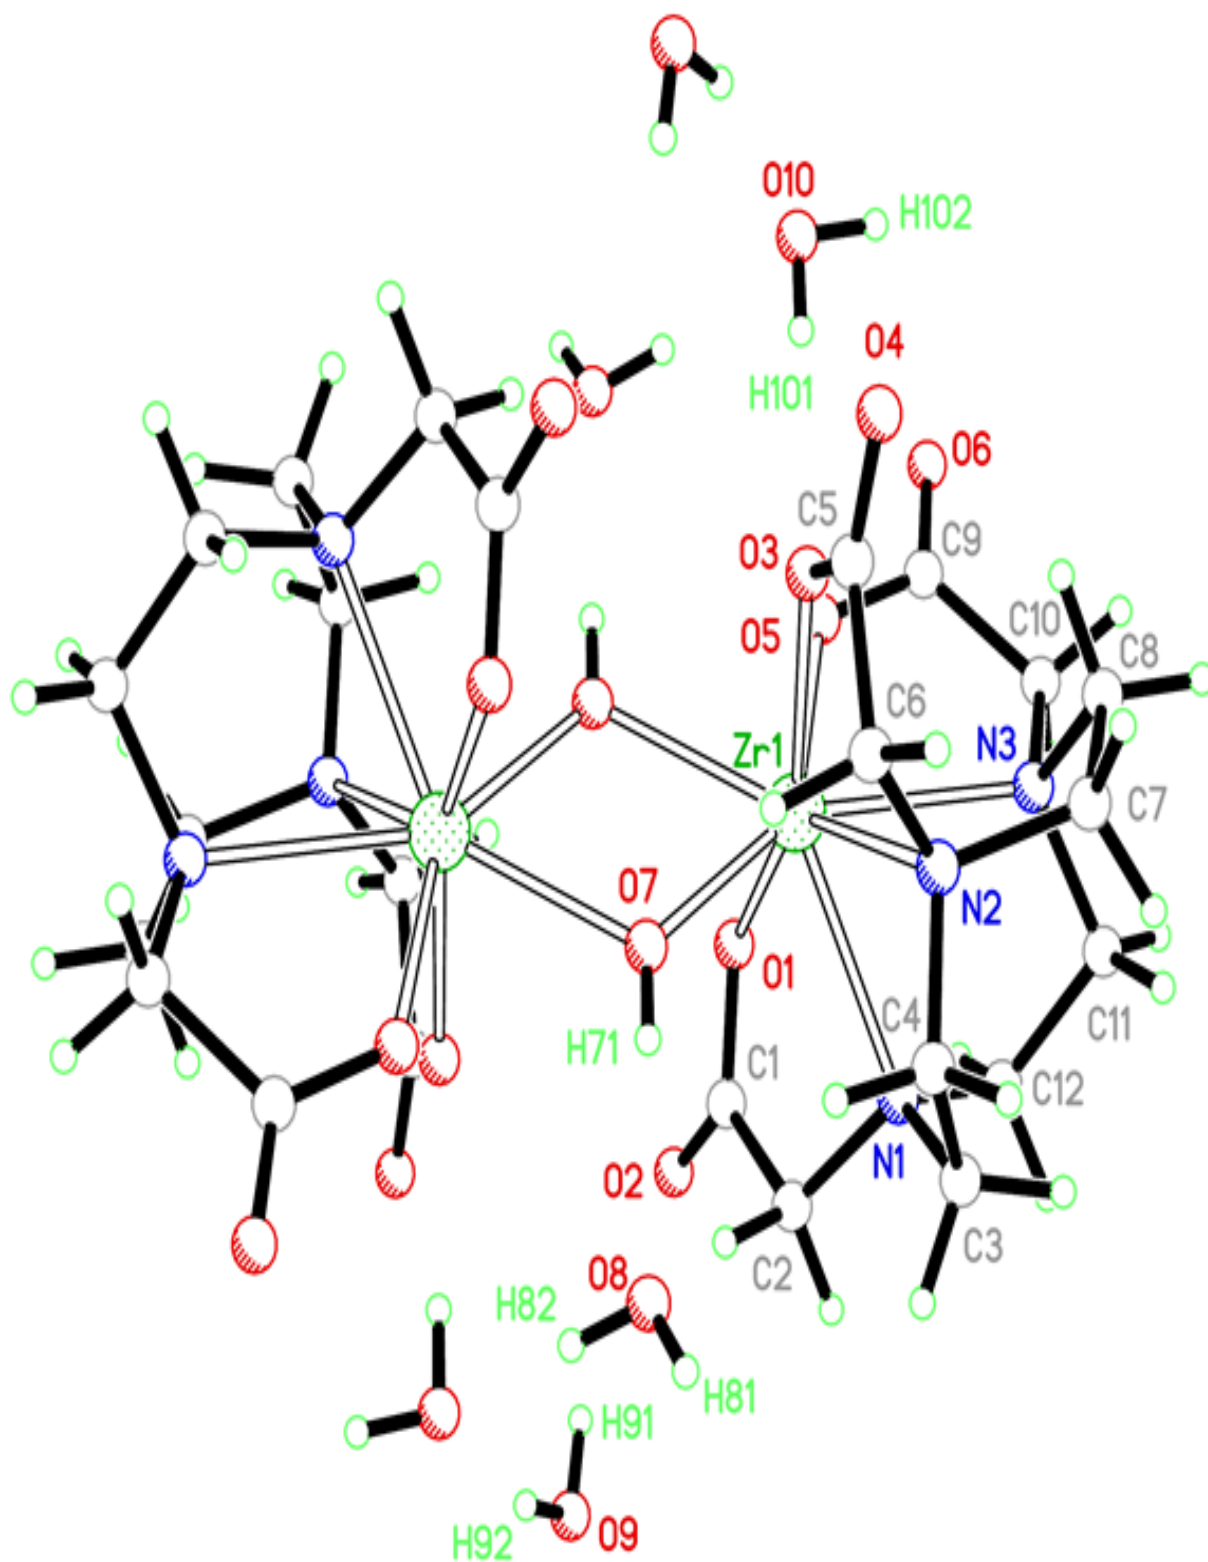

**Figure S36.** Plot of  $[\text{Zr}(\text{C}_{12}\text{H}_{18}\text{N}_3\text{O}_6)(\text{OH})]_2 \cdot 6 \text{H}_2\text{O}$  with disordered atoms  $\text{C}8'$ ,  $\text{C}10'$  and  $\text{C}11'$  omitted for clarity. All atoms represented by arbitrary-sized spheres.

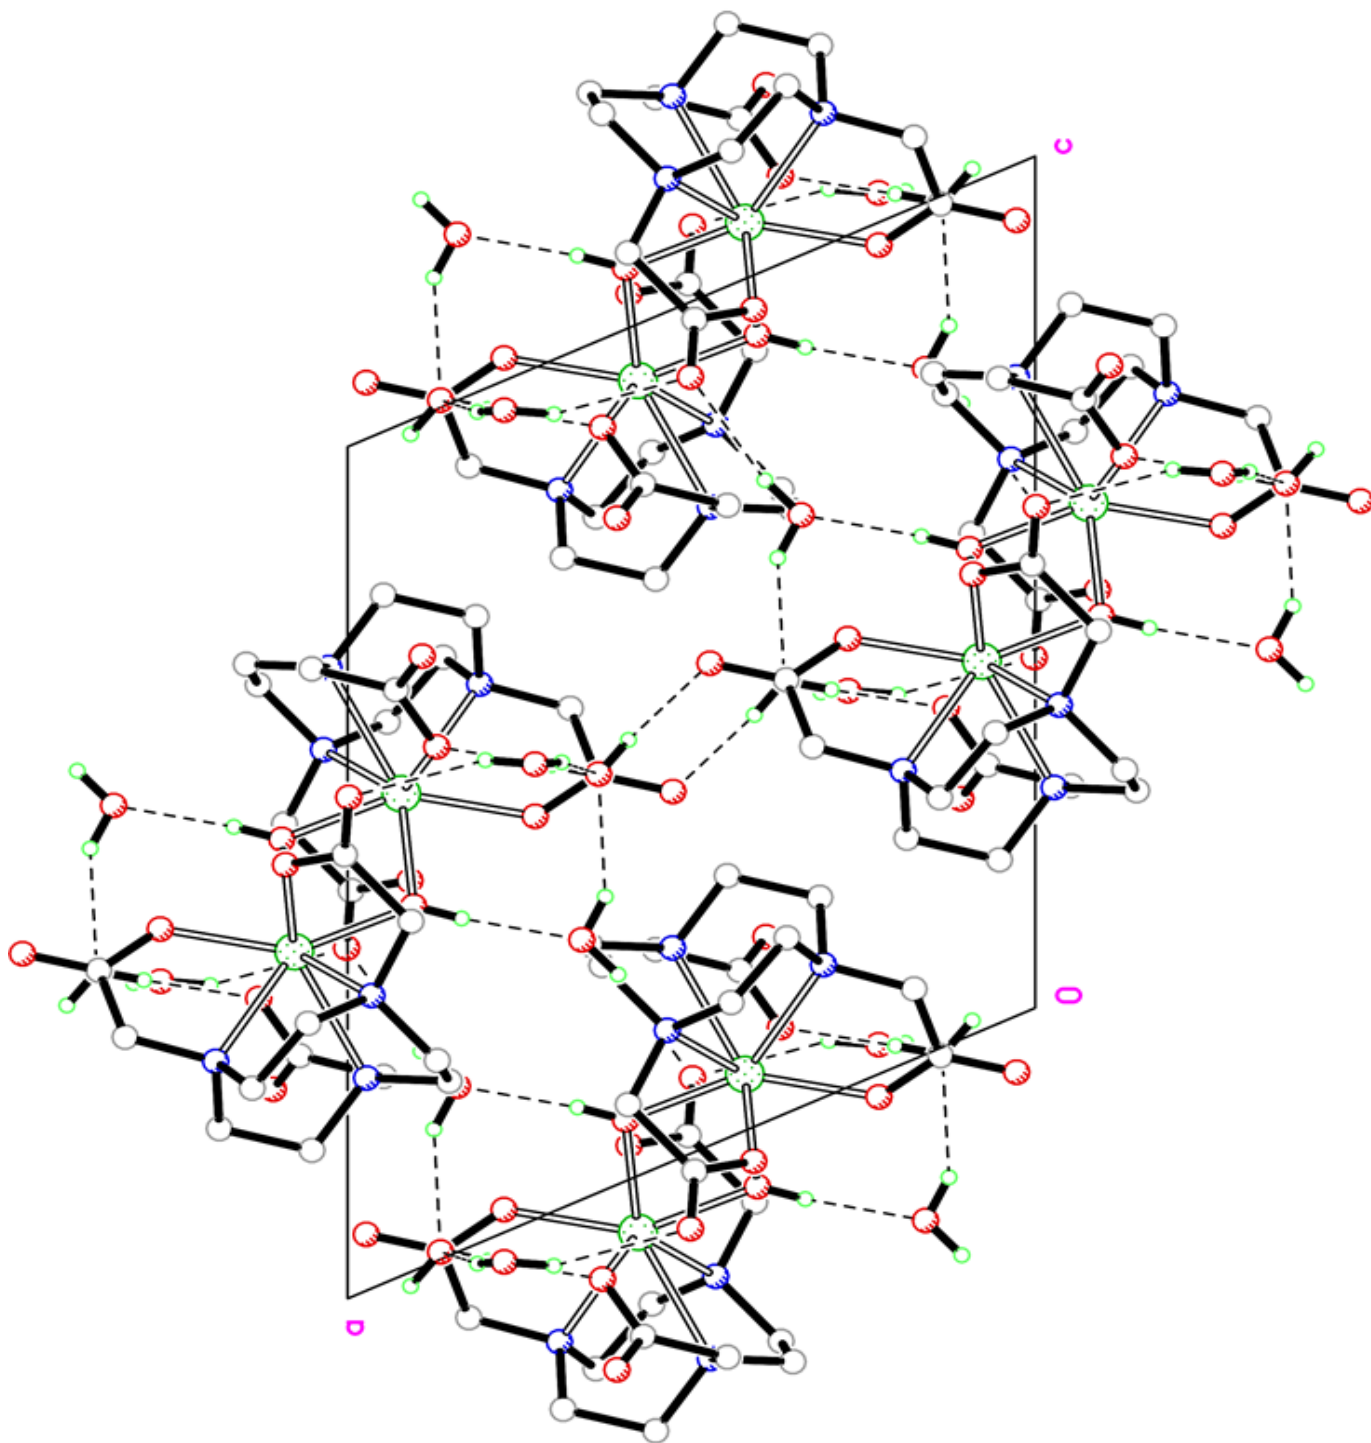

**Figure S37.** Packing plot of the solid-state structure of  $[\text{Zr}(\text{C}_{12}\text{H}_{18}\text{N}_3\text{O}_6)(\text{OH})_2] \cdot 6 \text{H}_2\text{O}$  viewed in projection down the  $b$  axis of the unit cell showing the major orientation (93%). All atoms are represented by dummy-sized spheres and ligand hydrogen atoms have been omitted for clarity. Hydrogen-bonding interactions are represented by dashed-solid bonds.

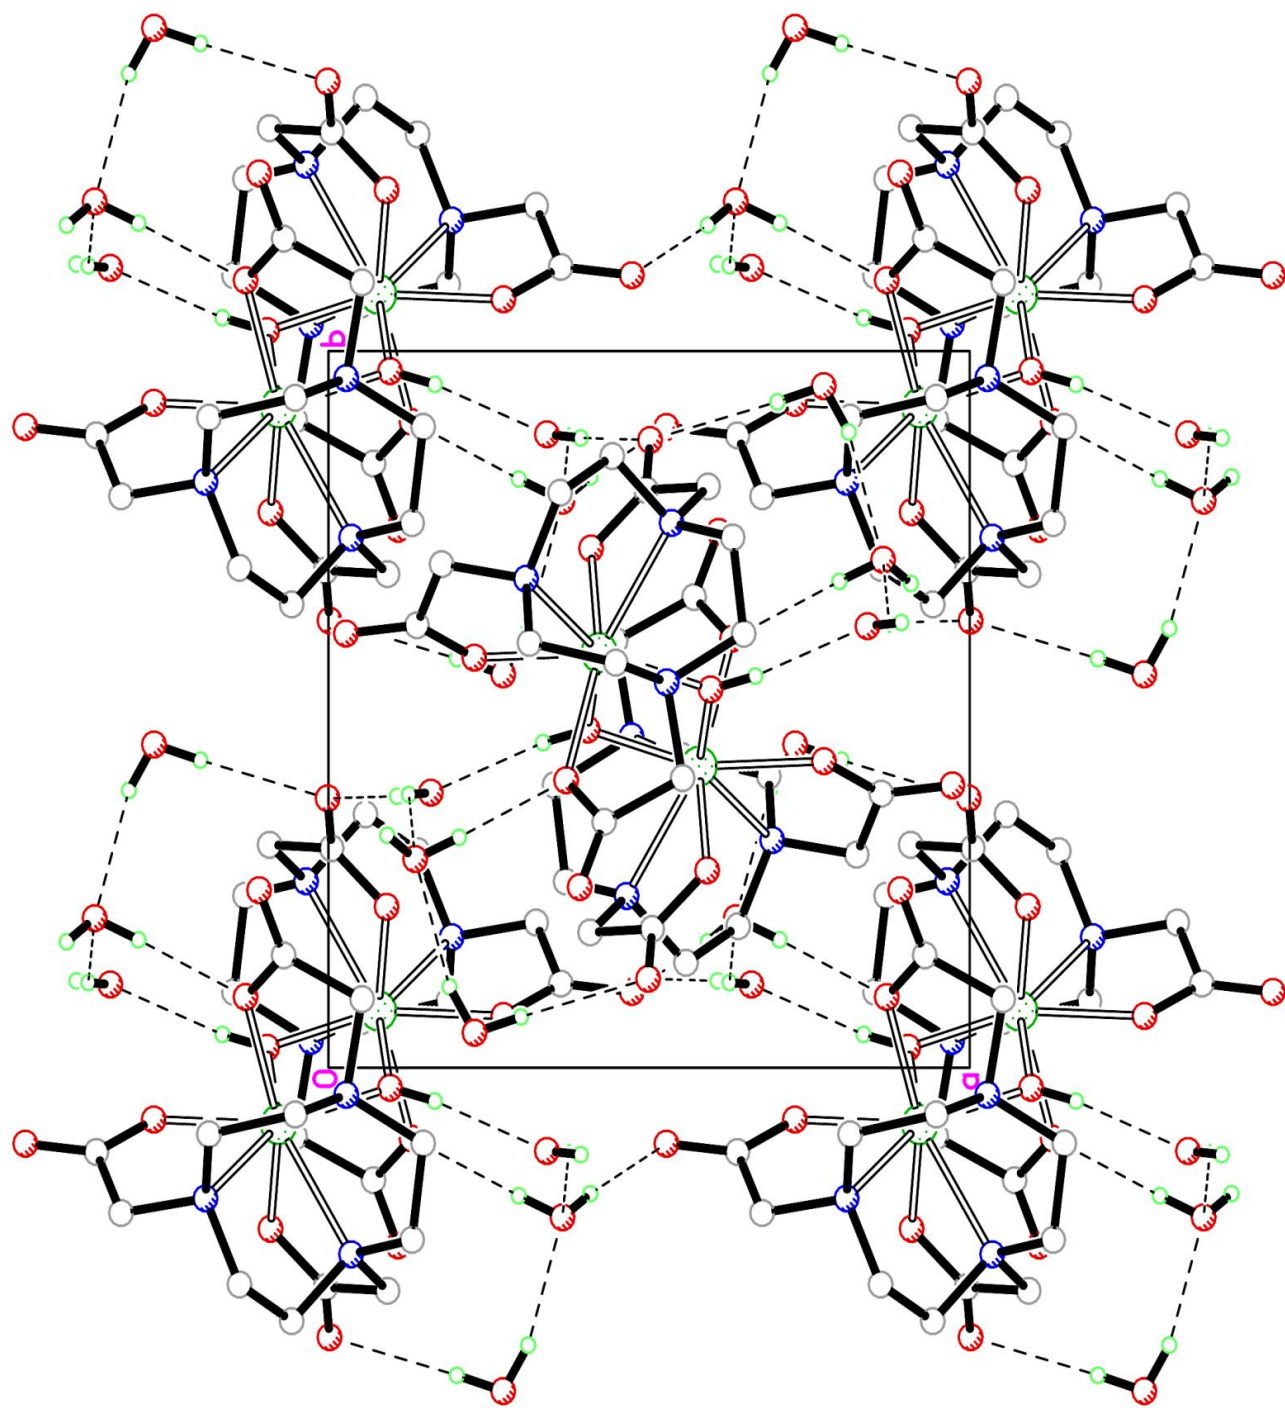

**Figure S38.** Packing plot of the solid-state structure of  $[\text{Zr}(\text{C}_{12}\text{H}_{18}\text{N}_3\text{O}_6)(\text{OH})_2] \cdot 6 \text{H}_2\text{O}$  viewed in projection down the  $c$  axis of the unit cell showing the major orientation (93%). All atoms are represented by dummy-sized spheres and ligand hydrogen atoms have been omitted for clarity. Hydrogen-bonding interactions are represented by dashed-solid bonds.

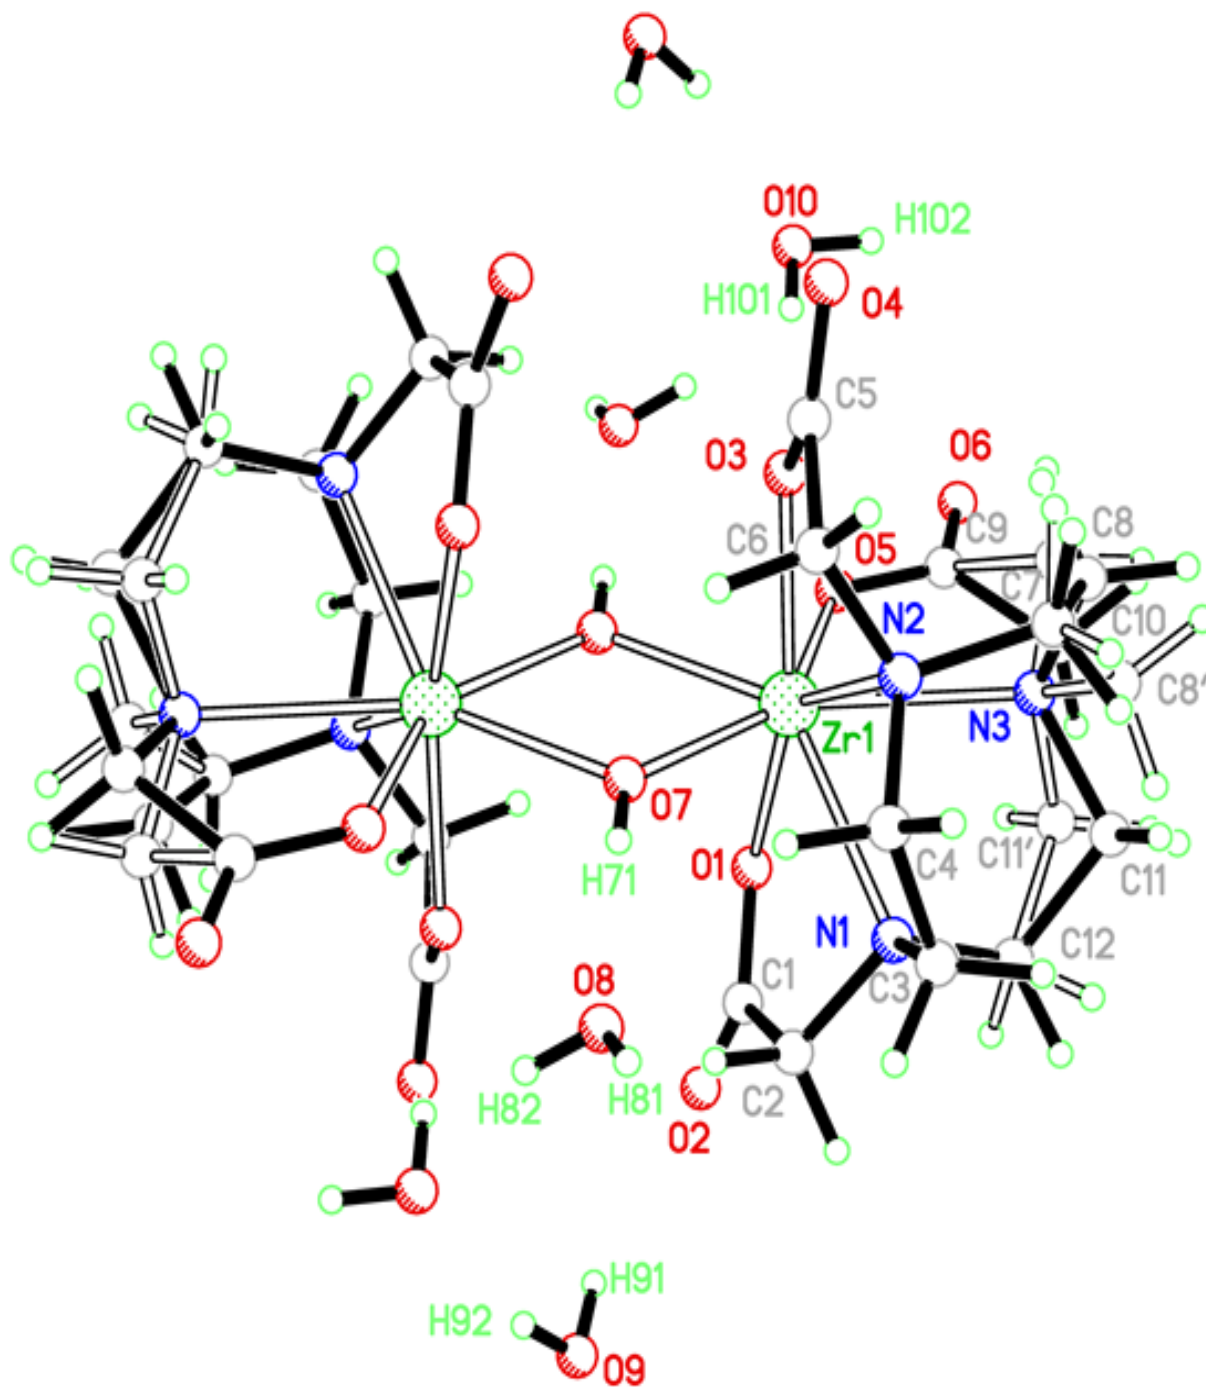

Figure S39. Plot of  $[\text{Zr}(\text{C}_{12}\text{H}_{18}\text{N}_3\text{O}_6)(\text{OH})]_2 \cdot 6 \text{H}_2\text{O}$  showing the disordered arrangement of carbon atoms about the Zr1-N3 bond with the major (93%) orientation designated by carbon atoms C8, C10 and C11 and the minor (7%) orientation designated by carbon atoms C8', C10' and C11'. All atoms are represented by arbitrary-sized spheres.



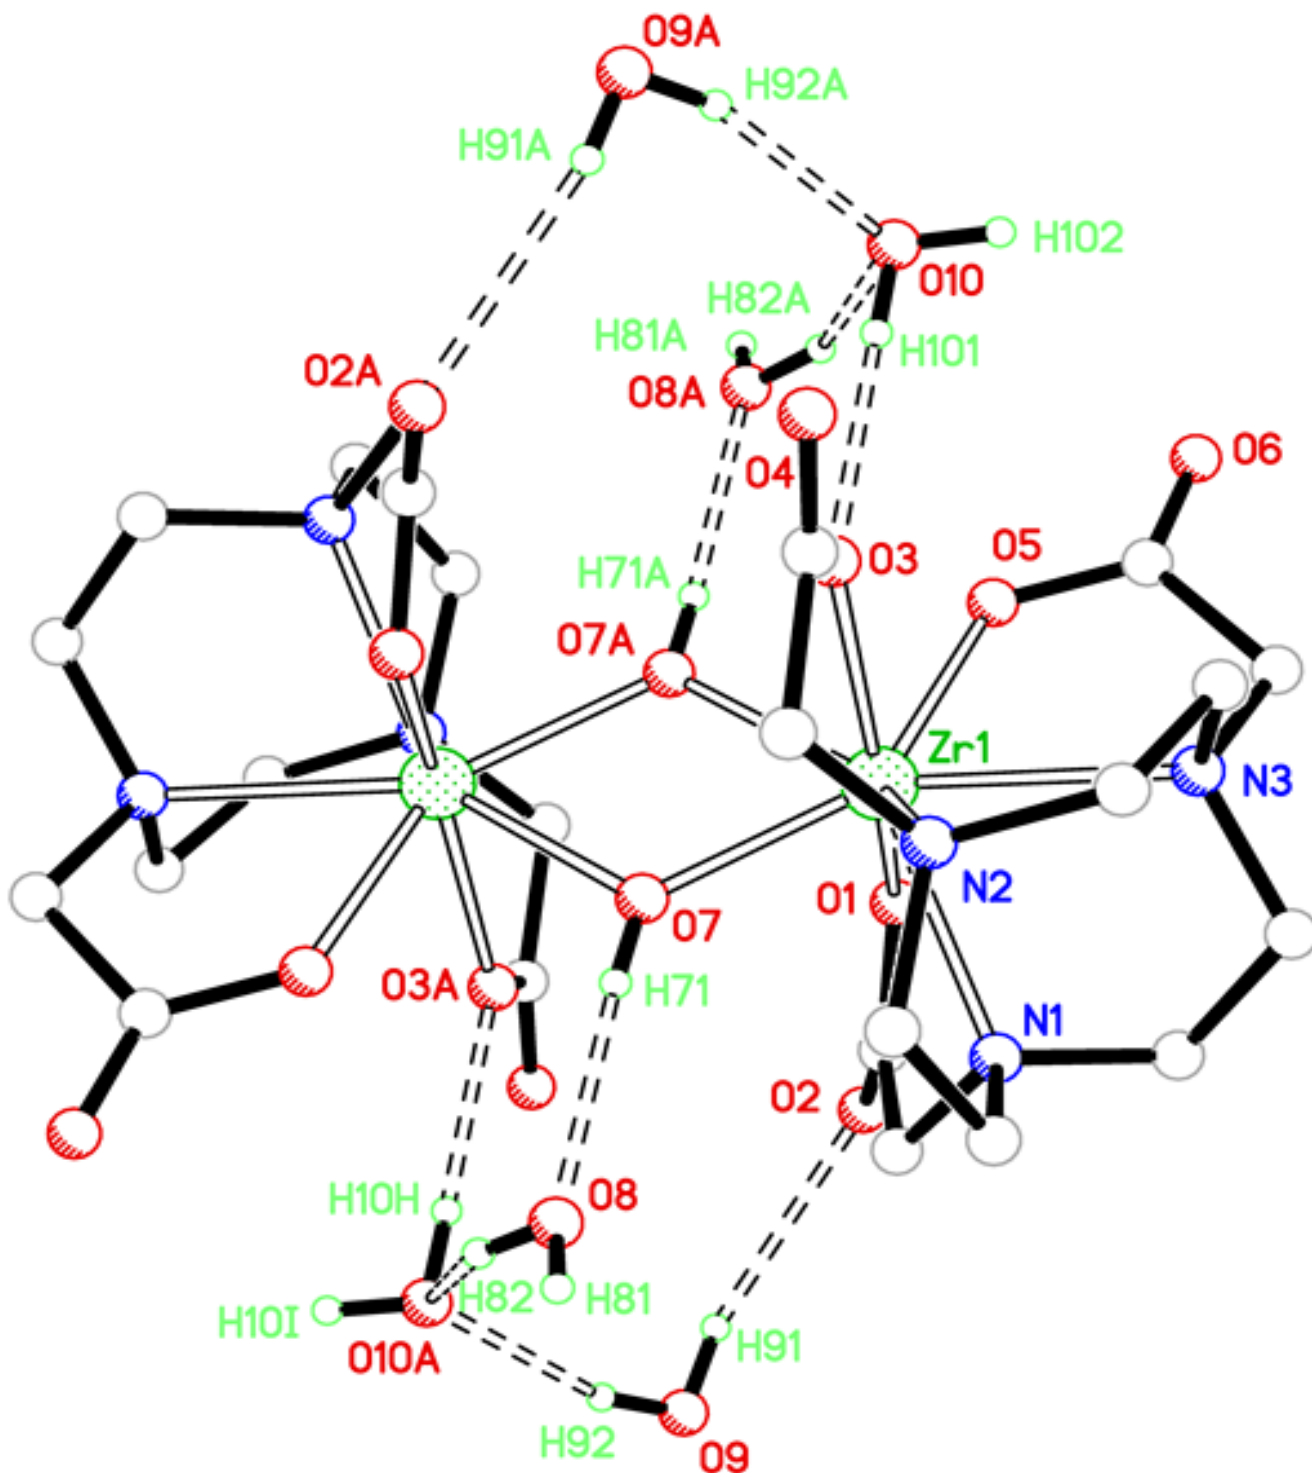

**Figure S40.** Plot of  $[\text{Zr}(\text{C}_{12}\text{H}_{18}\text{N}_3\text{O}_6)(\text{OH})]_2 \cdot 6 \text{H}_2\text{O}$  with disordered atoms C8', C10' and C11' omitted for clarity. All atoms represented by arbitrary-sized spheres. Ligand hydrogen atoms have been omitted and hydrogen-bonding interactions involving the bridging OH groups and lattice water molecules are represented by dashed-open bonds.

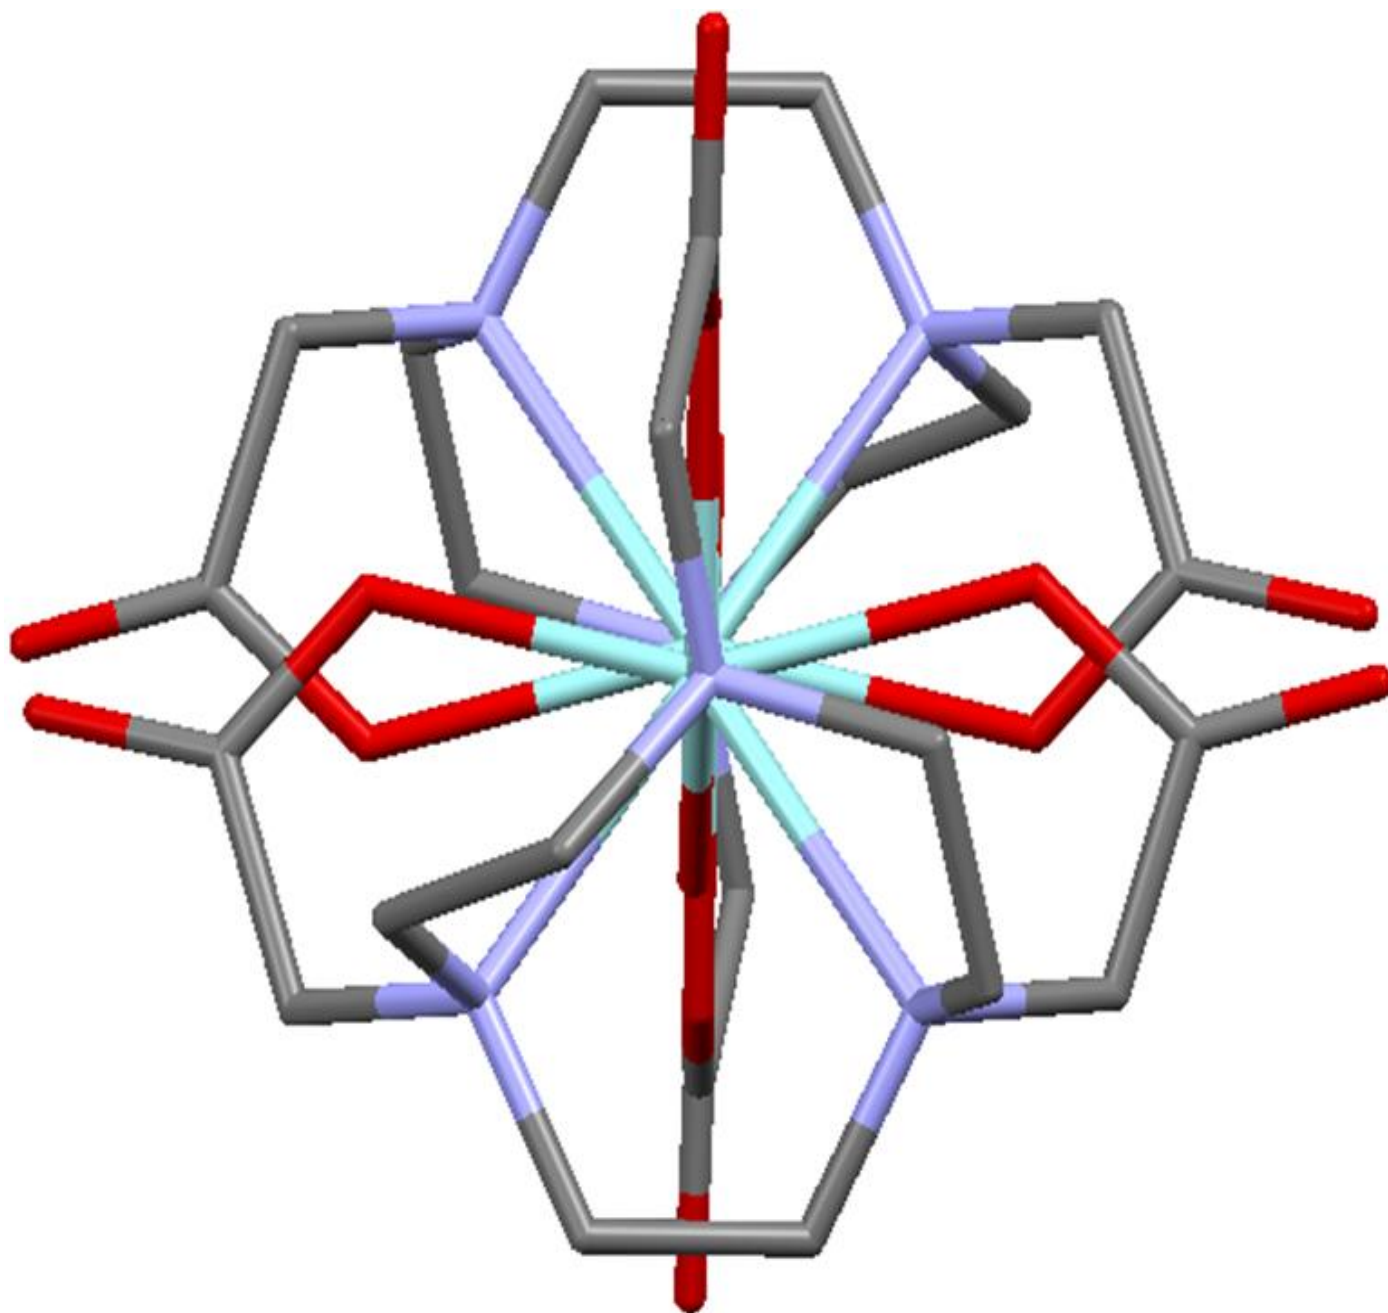

Figure S41. Plot of  $[\text{Zr}(\text{C}_{12}\text{H}_{18}\text{N}_3\text{O}_6)(\text{OH})]_2 \cdot 6 \text{H}_2\text{O}$ , viewed down the Zr...Zr vector, with disordered atoms C8', C10' and C11'. All hydrogen atoms and water molecules have been omitted for clarity.



**Table 11. Crystal structure data collection parameters****Crystal data**

|                                  |                                                         |
|----------------------------------|---------------------------------------------------------|
| $C_{24}H_{50}N_6O_{20}Zr_2$      | $F(000) = 952$                                          |
| $M_r = 925.14$                   | $D_x = 1.841 \text{ Mg m}^{-3}$                         |
| Monoclinic, $P2_1/n$             | Mo $K\alpha$ radiation, $\lambda = 0.71073 \text{ \AA}$ |
| $a = 11.7960 (7) \text{ \AA}$    | Cell parameters from 9847 reflections                   |
| $b = 10.9411 (6) \text{ \AA}$    | $\theta = 3.7\text{--}31.5^\circ$                       |
| $c = 14.1815 (8) \text{ \AA}$    | $\mu = 0.72 \text{ mm}^{-1}$                            |
| $\beta = 114.210 (1)^\circ$      | $T = 193 \text{ K}$                                     |
| $V = 1669.31 (16) \text{ \AA}^3$ | Irregular plate, colorless                              |
| $Z = 2$                          | $0.46 \times 0.30 \times 0.08 \text{ mm}$               |

**Data collection**

|                                                                                                                                                                                                                                                                                                              |                                                                        |
|--------------------------------------------------------------------------------------------------------------------------------------------------------------------------------------------------------------------------------------------------------------------------------------------------------------|------------------------------------------------------------------------|
| Bruker APEX CCD diffractometer                                                                                                                                                                                                                                                                               | 5078 independent reflections                                           |
| Radiation source: sealed x-ray tube                                                                                                                                                                                                                                                                          | 4778 reflections with $I > 2\sigma(I)$                                 |
| Graphite monochromator                                                                                                                                                                                                                                                                                       | $R_{\text{int}} = 0.031$                                               |
| $\phi$ and $\omega$ scans                                                                                                                                                                                                                                                                                    | $\theta_{\text{max}} = 30.5^\circ$ , $\theta_{\text{min}} = 3.5^\circ$ |
| Absorption correction: multi-scan Data were corrected for scaling and absorption effects using the multi-scan technique (SADABS). The ratio of minimum to maximum apparent transmission was 0.909. The calculated minimum and maximum transmission coefficients (based on crystal size) are 0.733 and 0.945. | $h = -16 \rightarrow 16$                                               |
| $T_{\text{min}} = 0.678$ , $T_{\text{max}} = 0.746$                                                                                                                                                                                                                                                          | $k = -15 \rightarrow 15$                                               |
| 31714 measured reflections                                                                                                                                                                                                                                                                                   | $l = -20 \rightarrow 20$                                               |

## Refinement

|                                 |                                                                                     |
|---------------------------------|-------------------------------------------------------------------------------------|
| Refinement on $F^2$             | 10 restraints                                                                       |
| Least-squares matrix: full      | Hydrogen site location: mixed                                                       |
| $R[F^2 > 2\sigma(F^2)] = 0.019$ | H atoms treated by a mixture of independent and constrained refinement              |
| $wR(F^2) = 0.052$               | $w = 1/[\sigma^2(F_o^2) + (0.0269P)^2 + 0.7232P]$<br>where $P = (F_o^2 + 2F_c^2)/3$ |
| $S = 1.03$                      | $(\Delta/\sigma)_{\max} = 0.002$                                                    |
| 5078 reflections                | $\Delta_{\max} = 0.52 \text{ e } \text{\AA}^{-3}$                                   |
| 276 parameters                  | $\Delta_{\min} = -0.24 \text{ e } \text{\AA}^{-3}$                                  |

## Special details

*Geometry.* All esds (except the esd in the dihedral angle between two l.s. planes) are estimated using the full covariance matrix. The cell esds are taken into account individually in the estimation of esds in distances, angles and torsion angles; correlations between esds in cell parameters are only used when they are defined by crystal symmetry. An approximate (isotropic) treatment of cell esds is used for estimating esds involving l.s. planes.

**Table S12. Fractional atomic coordinates and isotropic or equivalent isotropic displacement parameters (Å<sup>2</sup>)**

|     | x            | y            | z            | $U_{iso}^*/U_{eq}$ | Occ. (<1) |
|-----|--------------|--------------|--------------|--------------------|-----------|
| Zr1 | 0.42226 (2)  | 0.57931 (2)  | 0.06624 (2)  | 0.00986 (4)        |           |
| O1  | 0.40948 (7)  | 0.72464 (7)  | -0.04018 (6) | 0.01716 (15)       |           |
| O2  | 0.50149 (9)  | 0.87590 (9)  | -0.08801 (7) | 0.02681 (19)       |           |
| O3  | 0.37057 (7)  | 0.40118 (7)  | 0.10355 (6)  | 0.01641 (15)       |           |
| O4  | 0.39167 (9)  | 0.25215 (9)  | 0.21731 (7)  | 0.0285 (2)         |           |
| O5  | 0.22734 (7)  | 0.57222 (8)  | -0.02677 (6) | 0.01836 (16)       |           |
| O6  | 0.02701 (8)  | 0.60589 (10) | -0.06612 (7) | 0.02521 (19)       |           |
| O7  | 0.59586 (7)  | 0.52797 (7)  | 0.07190 (6)  | 0.01279 (14)       |           |
| H71 | 0.6656 (10)  | 0.5464 (17)  | 0.1103 (12)  | 0.032 (5)*         |           |
| N1  | 0.53517 (8)  | 0.76027 (8)  | 0.15638 (7)  | 0.01482 (16)       |           |
| N2  | 0.52750 (8)  | 0.53771 (9)  | 0.25042 (7)  | 0.01404 (16)       |           |
| N3  | 0.30800 (8)  | 0.68228 (9)  | 0.15594 (7)  | 0.01593 (17)       |           |
| C1  | 0.49519 (11) | 0.80627 (10) | -0.02259 (9) | 0.0173 (2)         |           |
| C2  | 0.59196 (10) | 0.81112 (10) | 0.08854 (8)  | 0.0179 (2)         |           |
| H2A | 0.6659       | 0.7625       | 0.0958       | 0.021*             |           |
| H2B | 0.6185       | 0.8966       | 0.1084       | 0.021*             |           |
| C3  | 0.63025 (11) | 0.74006 (11) | 0.26511 (8)  | 0.0187 (2)         |           |
| H3A | 0.6042       | 0.7846       | 0.3136       | 0.022*             |           |
| H3B | 0.7109       | 0.7744       | 0.2719       | 0.022*             |           |
| C4  | 0.64753 (10) | 0.60560 (11) | 0.29505 (8)  | 0.0170 (2)         |           |
| H4A | 0.7068       | 0.5685       | 0.2702       | 0.020*             |           |
| H4B | 0.6834       | 0.5984       | 0.3713       | 0.020*             |           |
| C5  | 0.42989 (10) | 0.34316 (10) | 0.19085 (8)  | 0.01681 (19)       |           |
| C6  | 0.55222 (10) | 0.40409 (10) | 0.25705 (9)  | 0.0167 (2)         |           |
| H6A | 0.5821       | 0.3759       | 0.3296       | 0.020*             |           |
| H6B | 0.6161       | 0.3844       | 0.2309       | 0.020*             |           |
| C7  | 0.44795 (11) | 0.56521 (11) | 0.30816 (9)  | 0.0189 (2)         |           |

|      |              |              |              |            |           |
|------|--------------|--------------|--------------|------------|-----------|
| H7A  | 0.4834       | 0.6362       | 0.3541       | 0.023*     | 0.932 (3) |
| H7B  | 0.4502       | 0.4943       | 0.3522       | 0.023*     | 0.932 (3) |
| H7C  | 0.3961       | 0.4927       | 0.3042       | 0.023*     | 0.068 (3) |
| H7D  | 0.5031       | 0.5785       | 0.3819       | 0.023*     | 0.068 (3) |
| C8   | 0.31342 (12) | 0.59285 (12) | 0.23689 (10) | 0.0189 (3) | 0.932 (3) |
| H8A  | 0.2708       | 0.5164       | 0.2037       | 0.023*     | 0.932 (3) |
| H8B  | 0.2699       | 0.6268       | 0.2777       | 0.023*     | 0.932 (3) |
| C9   | 0.13783 (10) | 0.61751 (11) | -0.00904 (8) | 0.0174 (2) |           |
| C10  | 0.17627 (12) | 0.70261 (13) | 0.08255 (10) | 0.0231 (3) | 0.932 (3) |
| H10A | 0.1659       | 0.7883       | 0.0579       | 0.028*     | 0.932 (3) |
| H10B | 0.1215       | 0.6895       | 0.1190       | 0.028*     | 0.932 (3) |
| C11  | 0.36107 (12) | 0.80236 (12) | 0.20561 (10) | 0.0207 (3) | 0.932 (3) |
| H11A | 0.2928       | 0.8603       | 0.1963       | 0.025*     | 0.932 (3) |
| H11B | 0.4102       | 0.7906       | 0.2807       | 0.025*     | 0.932 (3) |
| C12  | 0.44248 (11) | 0.85349 (10) | 0.15727 (9)  | 0.0198 (2) |           |
| H12A | 0.4868       | 0.9263       | 0.1965       | 0.024*     | 0.932 (3) |
| H12B | 0.3904       | 0.8794       | 0.0855       | 0.024*     | 0.932 (3) |
| H12C | 0.4398       | 0.9206       | 0.1096       | 0.024*     | 0.068 (3) |
| H12D | 0.4719       | 0.8886       | 0.2276       | 0.024*     | 0.068 (3) |
| C8'  | 0.3707 (13)  | 0.6658 (13)  | 0.2725 (11)  | 0.011 (3)* | 0.068 (3) |
| H8'A | 0.4201       | 0.7401       | 0.3029       | 0.013*     | 0.068 (3) |
| H8'B | 0.3052       | 0.6602       | 0.2990       | 0.013*     | 0.068 (3) |
| C10' | 0.1814 (13)  | 0.6236 (13)  | 0.1139 (11)  | 0.011 (3)* | 0.068 (3) |
| H10C | 0.1225       | 0.6730       | 0.1315       | 0.013*     | 0.068 (3) |
| H10D | 0.1860       | 0.5405       | 0.1428       | 0.013*     | 0.068 (3) |
| C11' | 0.3084 (15)  | 0.8044 (15)  | 0.1259 (12)  | 0.017 (3)* | 0.068 (3) |
| H11C | 0.2652       | 0.8555       | 0.1585       | 0.020*     | 0.068 (3) |
| H11D | 0.2621       | 0.8108       | 0.0500       | 0.020*     | 0.068 (3) |
| O8   | 0.84053 (9)  | 0.61618 (12) | 0.19501 (8)  | 0.0332 (2) |           |

|      |              |              |              |            |  |
|------|--------------|--------------|--------------|------------|--|
| H81  | 0.8933 (16)  | 0.621 (2)    | 0.2538 (8)   | 0.058 (7)* |  |
| H82  | 0.8746 (17)  | 0.619 (2)    | 0.1560 (12)  | 0.048 (6)* |  |
| O9   | 0.77230 (11) | 0.95110 (11) | -0.03463 (9) | 0.0365 (2) |  |
| H91  | 0.7000 (10)  | 0.9291 (19)  | -0.0639 (19) | 0.067 (8)* |  |
| H92  | 0.8114 (15)  | 0.8871 (12)  | -0.0234 (16) | 0.041 (5)* |  |
| O10  | 0.13509 (9)  | 0.29129 (10) | -0.00865 (8) | 0.0288 (2) |  |
| H101 | 0.2034 (10)  | 0.3214 (17)  | 0.0250 (14)  | 0.042 (5)* |  |
| H102 | 0.0916 (15)  | 0.3243 (18)  | 0.0166 (15)  | 0.047 (6)* |  |

**Table S13. Atomic displacement parameters ( $\text{\AA}^2$ )**

|     | $U^{11}$    | $U^{22}$    | $U^{33}$    | $U^{12}$    | $U^{13}$    | $U^{23}$     |
|-----|-------------|-------------|-------------|-------------|-------------|--------------|
| Zr1 | 0.00987 (5) | 0.01125 (5) | 0.00919 (5) | 0.00046 (3) | 0.00465 (4) | -0.00013 (3) |
| O1  | 0.0198 (4)  | 0.0154 (3)  | 0.0149 (3)  | -0.0001 (3) | 0.0057 (3)  | 0.0023 (3)   |
| O2  | 0.0367 (5)  | 0.0235 (4)  | 0.0218 (4)  | -0.0045 (4) | 0.0135 (4)  | 0.0053 (3)   |
| O3  | 0.0162 (3)  | 0.0172 (3)  | 0.0151 (3)  | -0.0020 (3) | 0.0058 (3)  | 0.0023 (3)   |
| O4  | 0.0302 (4)  | 0.0279 (5)  | 0.0271 (4)  | -0.0075 (4) | 0.0114 (4)  | 0.0090 (4)   |
| O5  | 0.0126 (3)  | 0.0262 (4)  | 0.0155 (4)  | 0.0029 (3)  | 0.0050 (3)  | -0.0031 (3)  |
| O6  | 0.0128 (4)  | 0.0415 (5)  | 0.0204 (4)  | 0.0033 (3)  | 0.0059 (3)  | 0.0035 (4)   |
| O7  | 0.0102 (3)  | 0.0162 (3)  | 0.0117 (3)  | -0.0009 (3) | 0.0042 (2)  | -0.0029 (3)  |
| N1  | 0.0172 (4)  | 0.0140 (4)  | 0.0136 (4)  | -0.0012 (3) | 0.0067 (3)  | -0.0013 (3)  |
| N2  | 0.0135 (4)  | 0.0170 (4)  | 0.0120 (4)  | 0.0004 (3)  | 0.0057 (3)  | 0.0011 (3)   |
| N3  | 0.0149 (4)  | 0.0194 (4)  | 0.0139 (4)  | 0.0025 (3)  | 0.0064 (3)  | -0.0012 (3)  |
| C1  | 0.0218 (5)  | 0.0145 (5)  | 0.0175 (5)  | 0.0012 (4)  | 0.0101 (4)  | 0.0007 (4)   |
| C2  | 0.0202 (5)  | 0.0166 (5)  | 0.0180 (5)  | -0.0041 (4) | 0.0089 (4)  | -0.0001 (4)  |
| C3  | 0.0194 (5)  | 0.0200 (5)  | 0.0138 (4)  | -0.0035 (4) | 0.0038 (4)  | -0.0035 (4)  |
| C4  | 0.0140 (4)  | 0.0223 (5)  | 0.0123 (4)  | -0.0022 (4) | 0.0029 (4)  | -0.0004 (4)  |
| C5  | 0.0174 (5)  | 0.0181 (5)  | 0.0173 (5)  | 0.0009 (4)  | 0.0096 (4)  | 0.0022 (4)   |
| C6  | 0.0161 (4)  | 0.0169 (5)  | 0.0163 (5)  | 0.0026 (4)  | 0.0058 (4)  | 0.0043 (4)   |

|     |            |            |            |             |            |             |
|-----|------------|------------|------------|-------------|------------|-------------|
| C7  | 0.0195 (5) | 0.0264 (5) | 0.0135 (4) | 0.0035 (4)  | 0.0094 (4) | 0.0016 (4)  |
| C8  | 0.0184 (5) | 0.0242 (6) | 0.0184 (5) | 0.0025 (4)  | 0.0118 (4) | 0.0016 (4)  |
| C9  | 0.0148 (4) | 0.0225 (5) | 0.0155 (5) | 0.0031 (4)  | 0.0069 (4) | 0.0037 (4)  |
| C10 | 0.0171 (5) | 0.0313 (7) | 0.0202 (6) | 0.0089 (5)  | 0.0068 (4) | -0.0022 (5) |
| C11 | 0.0247 (6) | 0.0187 (6) | 0.0206 (6) | 0.0027 (4)  | 0.0112 (5) | -0.0050 (4) |
| C12 | 0.0259 (5) | 0.0135 (5) | 0.0213 (5) | 0.0023 (4)  | 0.0111 (4) | -0.0024 (4) |
| O8  | 0.0223 (4) | 0.0549 (7) | 0.0243 (5) | -0.0115 (4) | 0.0114 (4) | -0.0111 (5) |
| O9  | 0.0382 (6) | 0.0298 (5) | 0.0380 (6) | 0.0007 (5)  | 0.0120 (5) | -0.0027 (5) |
| O10 | 0.0179 (4) | 0.0323 (5) | 0.0346 (5) | -0.0014 (4) | 0.0092 (4) | -0.0087 (4) |

**Table S14. Geometric parameters (Å, °)**

|                      |             |          |             |
|----------------------|-------------|----------|-------------|
| Zr1—O7               | 2.0930 (7)  | C4—H4B   | 0.9900      |
| Zr1—O5               | 2.1320 (8)  | C5—C6    | 1.5156 (15) |
| Zr1—O1               | 2.1546 (8)  | C6—H6A   | 0.9900      |
| Zr1—O3               | 2.1714 (8)  | C6—H6B   | 0.9900      |
| Zr1—O7 <sup>i</sup>  | 2.2176 (7)  | C7—C8'   | 1.385 (14)  |
| Zr1—N2               | 2.4313 (9)  | C7—C8    | 1.5218 (17) |
| Zr1—N1               | 2.4355 (9)  | C7—H7A   | 0.9900      |
| Zr1—N3               | 2.4719 (9)  | C7—H7B   | 0.9900      |
| Zr1—Zr1 <sup>i</sup> | 3.5680 (2)  | C7—H7C   | 0.9900      |
| O1—C1                | 1.2944 (14) | C7—H7D   | 0.9900      |
| O2—C1                | 1.2260 (14) | C8—H8A   | 0.9900      |
| O3—C5                | 1.3095 (13) | C8—H8B   | 0.9900      |
| O4—C5                | 1.2142 (14) | C9—C10   | 1.5089 (17) |
| O5—C9                | 1.2811 (14) | C9—C10'  | 1.604 (14)  |
| O6—C9                | 1.2298 (14) | C10—H10A | 0.9900      |
| O7—Zr1 <sup>i</sup>  | 2.2175 (7)  | C10—H10B | 0.9900      |
| O7—H71               | 0.804 (9)   | C11—C12  | 1.4983 (18) |

|                        |             |            |             |
|------------------------|-------------|------------|-------------|
| N1—C2                  | 1.4874 (14) | C11—H11A   | 0.9900      |
| N1—C12                 | 1.4991 (14) | C11—H11B   | 0.9900      |
| N1—C3                  | 1.5053 (14) | C12—C11'   | 1.553 (16)  |
| N2—C6                  | 1.4861 (14) | C12—H12A   | 0.9900      |
| N2—C4                  | 1.4906 (14) | C12—H12B   | 0.9900      |
| N2—C7                  | 1.5073 (14) | C12—H12C   | 0.9900      |
| N3—C11'                | 1.403 (16)  | C12—H12D   | 0.9900      |
| N3—C8                  | 1.4897 (15) | C8'—H8'A   | 0.9900      |
| N3—C10                 | 1.4903 (15) | C8'—H8'B   | 0.9900      |
| N3—C11                 | 1.5008 (16) | C10'—H10C  | 0.9900      |
| N3—C10'                | 1.506 (14)  | C10'—H10D  | 0.9900      |
| N3—C8'                 | 1.520 (14)  | C11'—H11C  | 0.9900      |
| C1—C2                  | 1.5212 (15) | C11'—H11D  | 0.9900      |
| C2—H2A                 | 0.9900      | O8—H81     | 0.813 (9)   |
| C2—H2B                 | 0.9900      | O8—H82     | 0.807 (9)   |
| C3—C4                  | 1.5216 (16) | O9—H91     | 0.817 (9)   |
| C3—H3A                 | 0.9900      | O9—H92     | 0.818 (9)   |
| C3—H3B                 | 0.9900      | O10—H101   | 0.818 (9)   |
| C4—H4A                 | 0.9900      | O10—H102   | 0.820 (9)   |
| O7—Zr1—O5              | 143.51 (3)  | N2—C4—H4A  | 109.3       |
| O7—Zr1—O1              | 90.64 (3)   | C3—C4—H4A  | 109.3       |
| O5—Zr1—O1              | 81.11 (3)   | N2—C4—H4B  | 109.3       |
| O7—Zr1—O3              | 96.77 (3)   | C3—C4—H4B  | 109.3       |
| O5—Zr1—O3              | 77.21 (3)   | H4A—C4—H4B | 108.0       |
| O1—Zr1—O3              | 152.51 (3)  | O4—C5—O3   | 124.58 (11) |
| O7—Zr1—O7 <sup>i</sup> | 68.30 (3)   | O4—C5—C6   | 123.31 (10) |
| O5—Zr1—O7 <sup>i</sup> | 75.25 (3)   | O3—C5—C6   | 112.10 (9)  |
| O1—Zr1—O7 <sup>i</sup> | 79.52 (3)   | N2—C6—C5   | 106.34 (9)  |
| O3—Zr1—O7 <sup>i</sup> | 78.77 (3)   | N2—C6—H6A  | 110.5       |

|                                       |             |             |             |
|---------------------------------------|-------------|-------------|-------------|
| O7—Zr1—N2                             | 81.26 (3)   | C5—C6—H6A   | 110.5       |
| O5—Zr1—N2                             | 127.15 (3)  | N2—C6—H6B   | 110.5       |
| O1—Zr1—N2                             | 138.50 (3)  | C5—C6—H6B   | 110.5       |
| O3—Zr1—N2                             | 68.95 (3)   | H6A—C6—H6B  | 108.7       |
| O7 <sup>i</sup> —Zr1—N2               | 132.20 (3)  | C8'—C7—N2   | 115.0 (6)   |
| O7—Zr1—N1                             | 83.23 (3)   | N2—C7—C8    | 113.00 (9)  |
| O5—Zr1—N1                             | 124.98 (3)  | N2—C7—H7A   | 109.0       |
| O1—Zr1—N1                             | 68.52 (3)   | C8—C7—H7A   | 109.0       |
| O3—Zr1—N1                             | 138.55 (3)  | N2—C7—H7B   | 109.0       |
| O7 <sup>i</sup> —Zr1—N1               | 136.71 (3)  | C8—C7—H7B   | 109.0       |
| N2—Zr1—N1                             | 70.12 (3)   | H7A—C7—H7B  | 107.8       |
| O7—Zr1—N3                             | 146.51 (3)  | C8'—C7—H7C  | 108.5       |
| O5—Zr1—N3                             | 69.98 (3)   | N2—C7—H7C   | 108.5       |
| O1—Zr1—N3                             | 97.34 (3)   | C8'—C7—H7D  | 108.5       |
| O3—Zr1—N3                             | 90.96 (3)   | N2—C7—H7D   | 108.5       |
| O7 <sup>i</sup> —Zr1—N3               | 145.13 (3)  | H7C—C7—H7D  | 107.5       |
| N2—Zr1—N3                             | 71.24 (3)   | N3—C8—C7    | 110.23 (10) |
| N1—Zr1—N3                             | 69.86 (3)   | N3—C8—H8A   | 109.6       |
| O7—Zr1—Zr1 <sup>i</sup>               | 35.27 (2)   | C7—C8—H8A   | 109.6       |
| O5—Zr1—Zr1 <sup>i</sup>               | 108.26 (2)  | N3—C8—H8B   | 109.6       |
| O1—Zr1—Zr1 <sup>i</sup>               | 83.89 (2)   | C7—C8—H8B   | 109.6       |
| O3—Zr1—Zr1 <sup>i</sup>               | 87.02 (2)   | H8A—C8—H8B  | 108.1       |
| O7 <sup>i</sup> —Zr1—Zr1 <sup>i</sup> | 33.025 (19) | O6—C9—O5    | 124.74 (11) |
| N2—Zr1—Zr1 <sup>i</sup>               | 109.17 (2)  | O6—C9—C10   | 119.57 (11) |
| N1—Zr1—Zr1 <sup>i</sup>               | 112.54 (2)  | O5—C9—C10   | 115.26 (10) |
| N3—Zr1—Zr1 <sup>i</sup>               | 177.60 (2)  | O6—C9—C10'  | 120.0 (5)   |
| C1—O1—Zr1                             | 123.33 (7)  | O5—C9—C10'  | 107.9 (5)   |
| C5—O3—Zr1                             | 124.81 (7)  | N3—C10—C9   | 111.61 (10) |
| C9—O5—Zr1                             | 129.13 (7)  | N3—C10—H10A | 109.3       |



|                          |             |               |             |
|--------------------------|-------------|---------------|-------------|
| Zr1—O7—Zr1 <sup>i</sup>  | 111.70 (3)  | C9—C10—H10A   | 109.3       |
| Zr1—O7—H71               | 132.2 (13)  | N3—C10—H10B   | 109.3       |
| Zr1 <sup>i</sup> —O7—H71 | 115.6 (13)  | C9—C10—H10B   | 109.3       |
| C2—N1—C12                | 105.93 (9)  | H10A—C10—H10B | 108.0       |
| C2—N1—C3                 | 111.93 (8)  | C12—C11—N3    | 109.54 (10) |
| C12—N1—C3                | 109.33 (8)  | C12—C11—H11A  | 109.8       |
| C2—N1—Zr1                | 105.01 (6)  | N3—C11—H11A   | 109.8       |
| C12—N1—Zr1               | 108.29 (6)  | C12—C11—H11B  | 109.8       |
| C3—N1—Zr1                | 115.83 (7)  | N3—C11—H11B   | 109.8       |
| C6—N2—C4                 | 109.62 (8)  | H11A—C11—H11B | 108.2       |
| C6—N2—C7                 | 108.16 (9)  | C11—C12—N1    | 110.88 (9)  |
| C4—N2—C7                 | 111.36 (9)  | N1—C12—C11'   | 115.0 (6)   |
| C6—N2—Zr1                | 104.63 (6)  | C11—C12—H12A  | 109.5       |
| C4—N2—Zr1                | 109.91 (6)  | N1—C12—H12A   | 109.5       |
| C7—N2—Zr1                | 112.89 (6)  | C11—C12—H12B  | 109.5       |
| C8—N3—C10                | 109.83 (10) | N1—C12—H12B   | 109.5       |
| C8—N3—C11                | 109.60 (9)  | H12A—C12—H12B | 108.1       |
| C10—N3—C11               | 108.17 (10) | N1—C12—H12C   | 108.5       |
| C11'—N3—C10'             | 114.4 (9)   | C11'—C12—H12C | 108.5       |
| C11'—N3—C8'              | 112.5 (8)   | N1—C12—H12D   | 108.5       |
| C10'—N3—C8'              | 110.0 (8)   | C11'—C12—H12D | 108.5       |
| C11'—N3—Zr1              | 101.9 (7)   | H12C—C12—H12D | 107.5       |
| C8—N3—Zr1                | 103.72 (7)  | C7—C8'—N3     | 116.4 (10)  |
| C10—N3—Zr1               | 109.94 (7)  | C7—C8'—H8'A   | 108.2       |
| C11—N3—Zr1               | 115.46 (7)  | N3—C8'—H8'A   | 108.2       |
| C10'—N3—Zr1              | 105.3 (5)   | C7—C8'—H8'B   | 108.2       |
| C8'—N3—Zr1               | 112.4 (5)   | N3—C8'—H8'B   | 108.2       |
| O2—C1—O1                 | 124.60 (11) | H8'A—C8'—H8'B | 107.3       |
| O2—C1—C2                 | 120.65 (10) | N3—C10'—C9    | 105.8 (8)   |

|              |              |                |              |
|--------------|--------------|----------------|--------------|
| O1—C1—C2     | 114.76 (9)   | N3—C10'—H10C   | 110.6        |
| N1—C2—C1     | 108.15 (9)   | C9—C10'—H10C   | 110.6        |
| N1—C2—H2A    | 110.1        | N3—C10'—H10D   | 110.6        |
| C1—C2—H2A    | 110.1        | C9—C10'—H10D   | 110.6        |
| N1—C2—H2B    | 110.1        | H10C—C10'—H10D | 108.7        |
| C1—C2—H2B    | 110.1        | N3—C11'—C12    | 111.9 (10)   |
| H2A—C2—H2B   | 108.4        | N3—C11'—H11C   | 109.2        |
| N1—C3—C4     | 112.71 (9)   | C12—C11'—H11C  | 109.2        |
| N1—C3—H3A    | 109.0        | N3—C11'—H11D   | 109.2        |
| C4—C3—H3A    | 109.0        | C12—C11'—H11D  | 109.2        |
| N1—C3—H3B    | 109.0        | H11C—C11'—H11D | 107.9        |
| C4—C3—H3B    | 109.0        | H81—O8—H82     | 108.3 (17)   |
| H3A—C3—H3B   | 107.8        | H91—O9—H92     | 103.6 (17)   |
| N2—C4—C3     | 111.60 (9)   | H101—O10—H102  | 102.1 (16)   |
| Zr1—O1—C1—O2 | 166.26 (9)   | Zr1—O5—C9—O6   | -177.79 (9)  |
| Zr1—O1—C1—C2 | -13.66 (13)  | Zr1—O5—C9—C10  | 9.74 (15)    |
| C12—N1—C2—C1 | -71.30 (10)  | Zr1—O5—C9—C10' | -28.1 (6)    |
| C3—N1—C2—C1  | 169.63 (9)   | C8—N3—C10—C9   | -92.35 (12)  |
| Zr1—N1—C2—C1 | 43.18 (9)    | C11—N3—C10—C9  | 148.06 (11)  |
| O2—C1—C2—N1  | 155.90 (11)  | Zr1—N3—C10—C9  | 21.16 (13)   |
| O1—C1—C2—N1  | -24.18 (13)  | O6—C9—C10—N3   | 166.12 (11)  |
| C2—N1—C3—C4  | -114.42 (10) | O5—C9—C10—N3   | -20.99 (16)  |
| C12—N1—C3—C4 | 128.54 (10)  | C8—N3—C11—C12  | 137.31 (10)  |
| Zr1—N1—C3—C4 | 5.92 (12)    | C10—N3—C11—C12 | -102.96 (11) |
| C6—N2—C4—C3  | 164.89 (9)   | Zr1—N3—C11—C12 | 20.67 (12)   |
| C7—N2—C4—C3  | -75.45 (11)  | N3—C11—C12—N1  | -51.06 (13)  |
| Zr1—N2—C4—C3 | 50.41 (10)   | C2—N1—C12—C11  | 168.66 (9)   |
| N1—C3—C4—N2  | -37.23 (13)  | C3—N1—C12—C11  | -70.57 (11)  |
| Zr1—O3—C5—O4 | 169.35 (9)   | Zr1—N1—C12—C11 | 56.45 (10)   |

|               |              |                  |             |
|---------------|--------------|------------------|-------------|
| Zr1—O3—C5—C6  | -9.66 (13)   | C2—N1—C12—C11'   | 125.3 (7)   |
| C4—N2—C6—C5   | -168.28 (9)  | C3—N1—C12—C11'   | -113.9 (7)  |
| C7—N2—C6—C5   | 70.12 (10)   | Zr1—N1—C12—C11'  | 13.1 (7)    |
| Zr1—N2—C6—C5  | -50.45 (9)   | N2—C7—C8'—N3     | 40.0 (11)   |
| O4—C5—C6—N2   | -136.71 (12) | C11'—N3—C8'—C7   | -137.8 (11) |
| O3—C5—C6—N2   | 42.32 (12)   | C10'—N3—C8'—C7   | 93.4 (11)   |
| C6—N2—C7—C8'  | -151.3 (6)   | Zr1—N3—C8'—C7    | -23.4 (11)  |
| C4—N2—C7—C8'  | 88.2 (6)     | C11'—N3—C10'—C9  | 65.5 (11)   |
| Zr1—N2—C7—C8' | -36.0 (6)    | C8'—N3—C10'—C9   | -166.8 (8)  |
| C6—N2—C7—C8   | -105.91 (11) | Zr1—N3—C10'—C9   | -45.5 (8)   |
| C4—N2—C7—C8   | 133.57 (10)  | O6—C9—C10'—N3    | -159.9 (5)  |
| Zr1—N2—C7—C8  | 9.37 (12)    | O5—C9—C10'—N3    | 48.8 (8)    |
| C10—N3—C8—C7  | 176.36 (10)  | C10'—N3—C11'—C12 | -171.2 (9)  |
| C11—N3—C8—C7  | -64.94 (12)  | C8'—N3—C11'—C12  | 62.4 (12)   |
| Zr1—N3—C8—C7  | 58.89 (10)   | Zr1—N3—C11'—C12  | -58.2 (10)  |
| N2—C7—C8—N3   | -47.53 (13)  | N1—C12—C11'—N3   | 32.5 (12)   |

Symmetry code: (i)  $-x+1, -y+1, -z$ .

**Table S15. Hydrogen-bond geometry (Å, °)**

| <i>D</i> —H... <i>A</i>      | <i>D</i> —H | H... <i>A</i> | <i>D</i> ... <i>A</i> | <i>D</i> —H... <i>A</i> |
|------------------------------|-------------|---------------|-----------------------|-------------------------|
| O7—H71...O8                  | 0.80 (1)    | 2.06 (1)      | 2.8594 (12)           | 172 (2)                 |
| O8—H81...O2 <sup>ii</sup>    | 0.81 (1)    | 2.08 (1)      | 2.8792 (14)           | 169 (2)                 |
| O8—H82...O10 <sup>i</sup>    | 0.81 (1)    | 2.27 (1)      | 2.9522 (16)           | 143 (2)                 |
| O9—H91...O2                  | 0.82 (1)    | 2.30 (1)      | 3.0776 (16)           | 160 (3)                 |
| O9—H92...O10 <sup>i</sup>    | 0.82 (1)    | 2.04 (1)      | 2.8378 (16)           | 164 (2)                 |
| O10—H101...O3                | 0.82 (1)    | 2.02 (1)      | 2.8404 (12)           | 178 (2)                 |
| O10—H102...O6 <sup>iii</sup> | 0.82 (1)    | 1.96 (1)      | 2.7766 (14)           | 174 (2)                 |

Symmetry codes: (i)  $-x+1, -y+1, -z$ ; (ii)  $x+1/2, -y+3/2, z+1/2$ ; (iii)  $-x, -y+1, -z$ .

**Least-squares planes (x,y,z in crystal coordinates) and deviations from them (\* indicates atom used to define plane).**

$$- 1.8012 (0.0053) x + 5.1785 (0.0044) y + 12.1093 (0.0034) z = 4.8668 (0.0034)$$

\* 0.0000 (0.0000) N1

\* 0.0000 (0.0000) N2

\* 0.0000 (0.0000) N3

-1.8253 (0.0005) Zr1

-2.3383 (0.0013) O1

-2.2028 (0.0014) O3

-2.6372 (0.0013) O5

-2.3353 (0.0013) O7

Rms deviation of fitted atoms = 0.0000

$$- 3.9828 (0.0061) x + 5.8162 (0.0026) y + 12.0108 (0.0022) z = 2.1012 (0.0025)$$

Angle to previous plane (with approximate esd) = 12.290 (0.049)

\* 0.0000 (0.0000) O1

\* 0.0000 (0.0000) O3

\* 0.0000 (0.0000) O5

0.3820 (0.0007) Zr1

-0.5400 (0.0018) O7

2.0675 (0.0016) N1

1.9331 (0.0017) N2

2.5134 (0.0011) N3

Rms deviation of fitted atoms = 0.0000

$$- 2.4457 (0.0031) x + 5.6205 (0.0026) y + 11.9740 (0.0022) z = 2.4723 (0.0020)$$

Angle to previous plane (with approximate esd) = 8.192 (0.039)

\* 0.1179 (0.0004) O1

\* 0.1161 (0.0004) O3

\* -0.1327 (0.0005) O5

\* -0.1013 (0.0003) O7

0.5441 (0.0004) Zr1

2.3644 (0.0011) N1

2.2583 (0.0011) N2

2.4764 (0.0011) N3

Rms deviation of fitted atoms = 0.1175

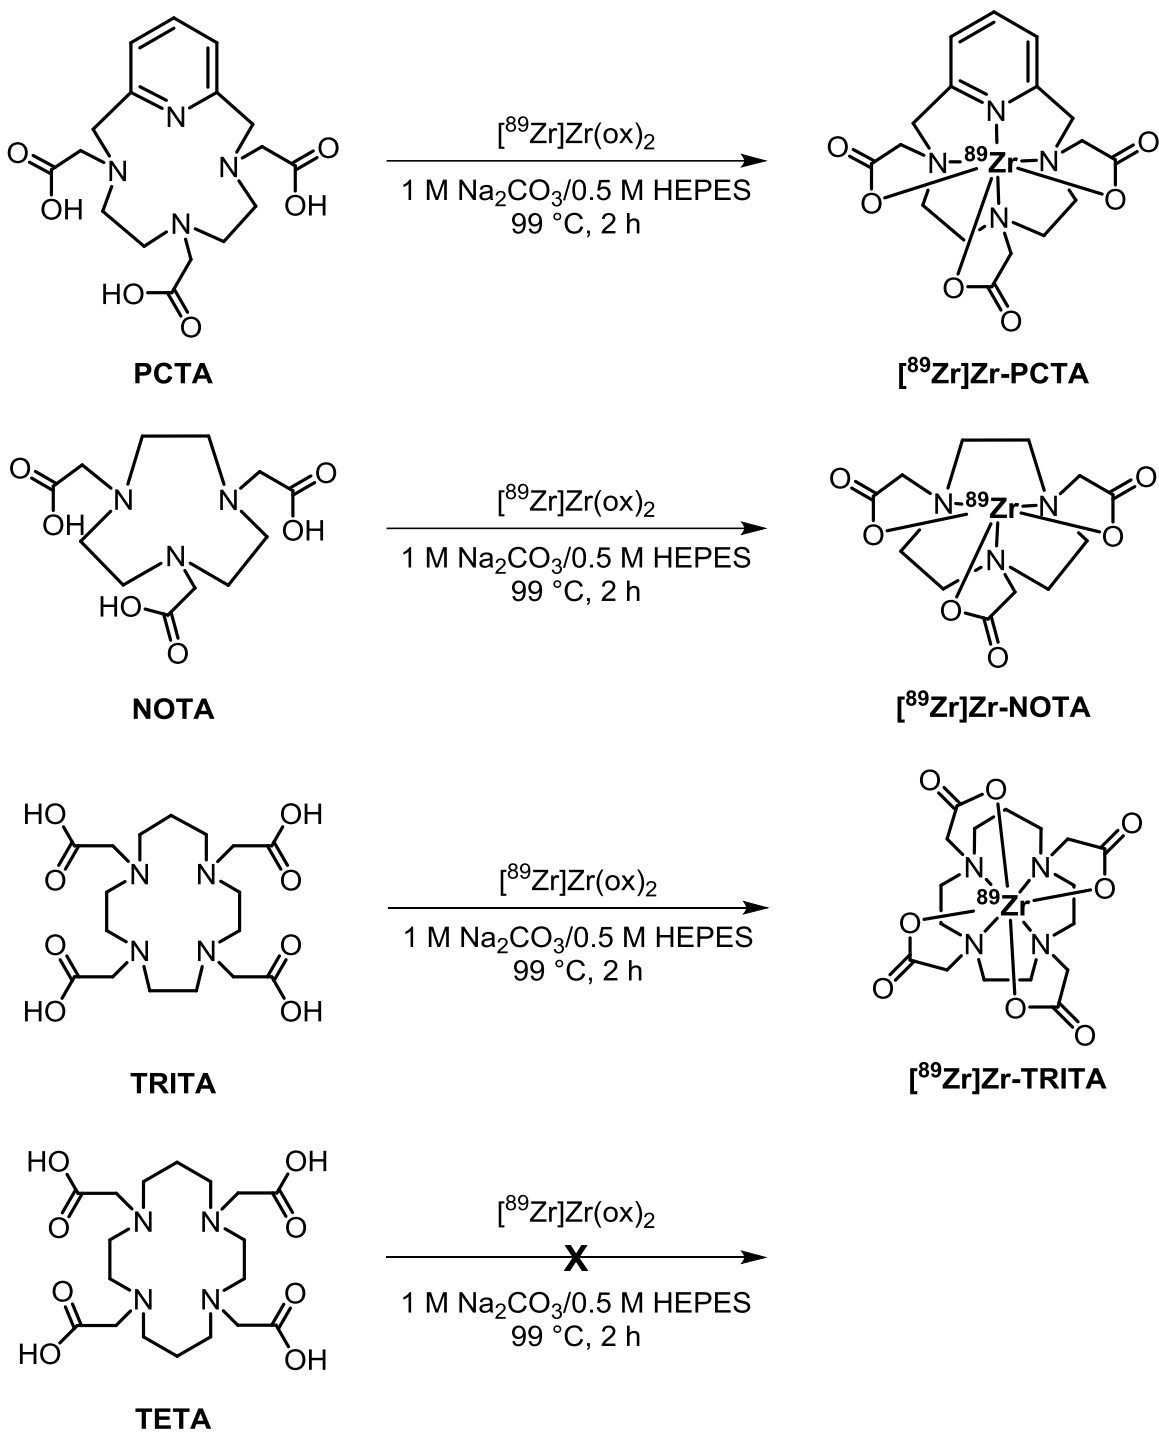

**Scheme S5.** Radiochemical Synthesis of [<sup>89</sup>Zr]Zr-PCTA, [<sup>89</sup>Zr]Zr-NOTA, [<sup>89</sup>Zr]Zr-TRITA and [<sup>89</sup>Zr]Zr-TETA using [<sup>89</sup>Zr]Zr(ox)<sub>2</sub>

**Table S16. Summary of optimized radiochemistry conditions to prepare  $^{89}\text{Zr}$ -complexes with  $[\text{}^{89}\text{Zr}]\text{Zr}(\text{ox})_2$**

| Radiochemistry conditions                                   | Ligands (n = 10) |              |             |             |
|-------------------------------------------------------------|------------------|--------------|-------------|-------------|
|                                                             | PCTA             | NOTA         | TRITA       | TETA        |
| Quantity ( $\mu\text{g}$ )                                  | 10-50            | 10-50        | 10-50       | 10-50       |
| $[\text{}^{89}\text{Zr}]\text{Zr}(\text{ox})_2$ added (MBq) | 16.5-20.5        | 16.5-20.5    | 16.5-20.5   | 16.5-20.5   |
| Reaction Buffer                                             | 0.5 M HEPES      | 0.5 M HEPES  | 0.5 M HEPES | 0.5 M HEPES |
| Final Reaction pH                                           | 6.9-7.3          | 6.9-7.3      | 6.9-7.3     | 6.9-7.3     |
| Reaction Temperature ( $^{\circ}\text{C}$ )                 | 99               | 99           | 99          | 99          |
| Reaction time (min)                                         | 120              | 120          | 120         | 120         |
| Radiochemical yield (%)                                     | $35 \pm 9.3$     | $15 \pm 5.7$ | $3 \pm 1.3$ | 0           |

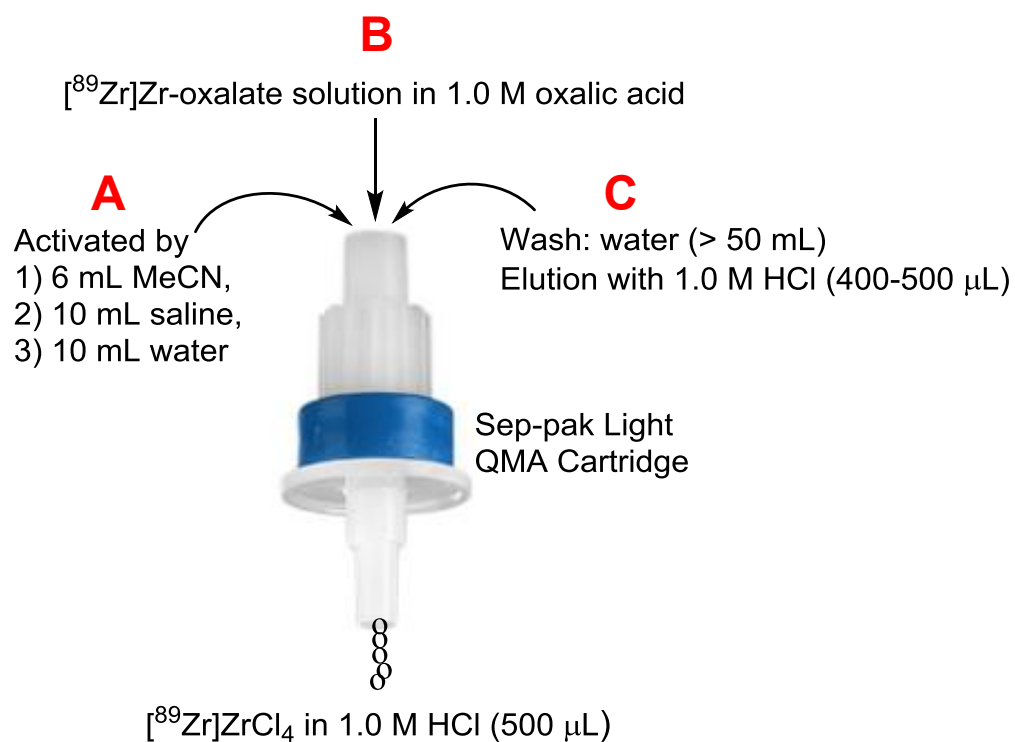

Figure S42. Schematic diagram for the production of [<sup>89</sup>Zr]ZrCl<sub>4</sub> from [<sup>89</sup>Zr]Zr(ox)<sub>2</sub>



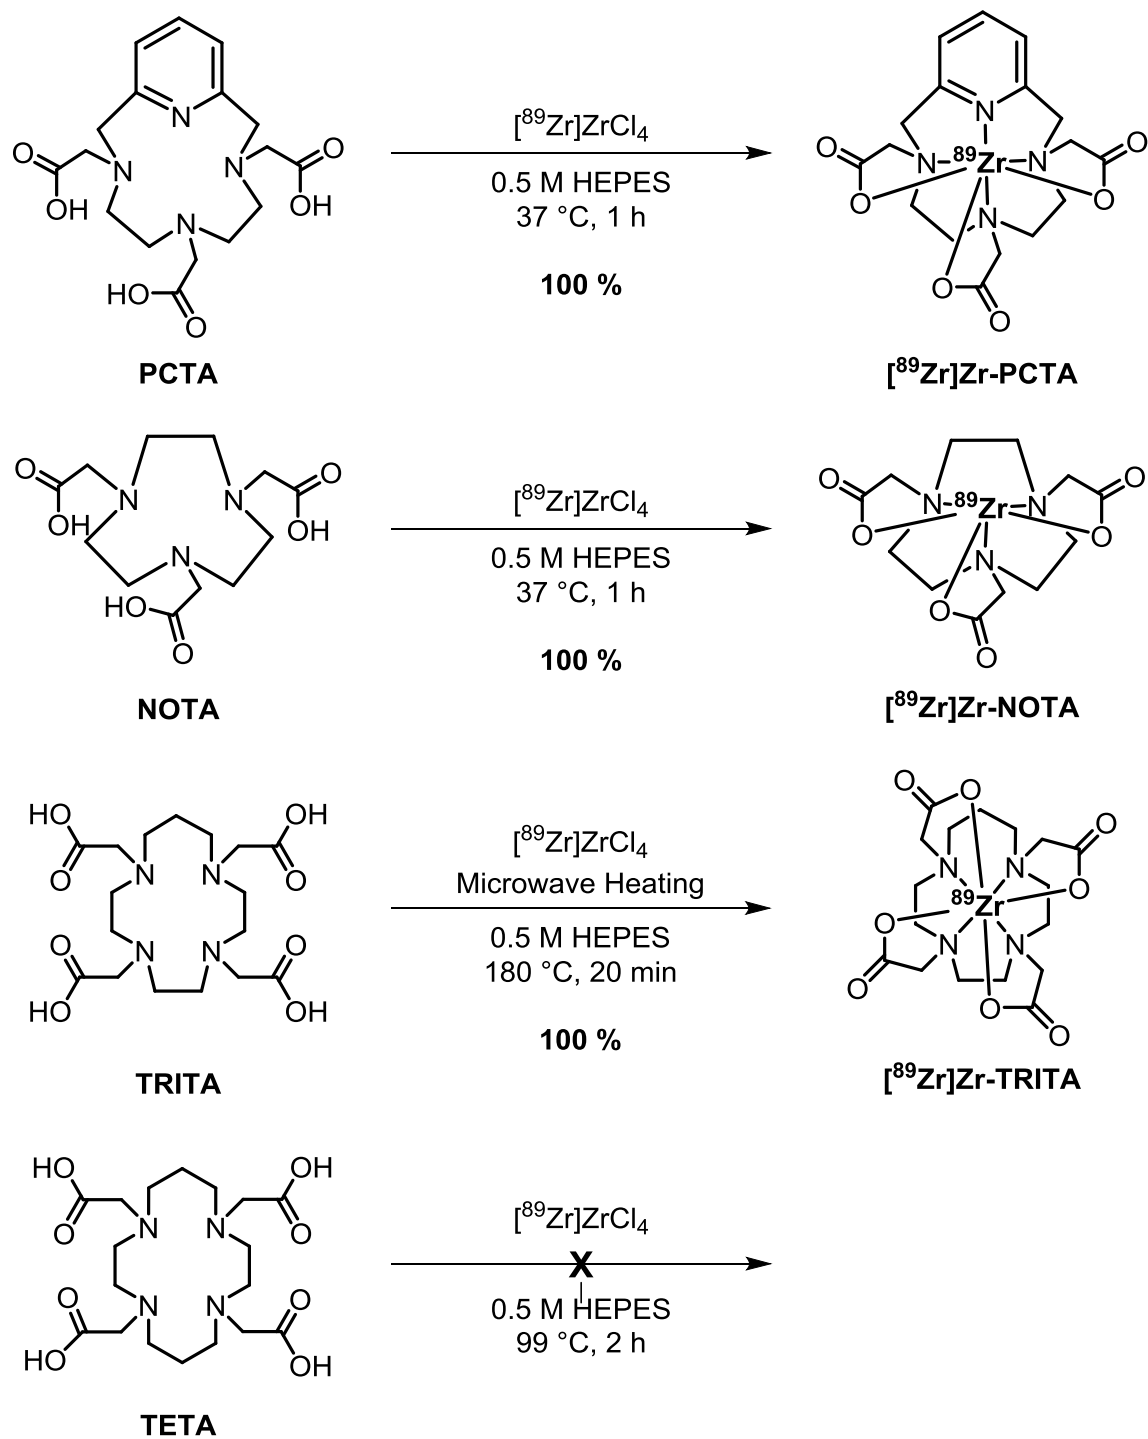

**Scheme S6.** Radiochemical Synthesis of [<sup>89</sup>Zr]Zr-PCTA, [<sup>89</sup>Zr]Zr-NOTA, [<sup>89</sup>Zr]Zr-TRITA and [<sup>89</sup>Zr]Zr-TETA using [<sup>89</sup>Zr]ZrCl<sub>4</sub>

## Radiochemical Synthesis of [<sup>89</sup>Zr]Zr-PCTA with [<sup>89</sup>Zr]ZrCl<sub>4</sub>:

Table S17. Summary of optimized radiochemistry conditions and [<sup>89</sup>Zr]ZrCl<sub>4</sub> activity used to prepare [<sup>89</sup>Zr]Zr-PCTA<sup>a</sup> complex (n = 4 for each buffer)

| Quantity of Ligand | [ <sup>89</sup> Zr]ZrCl <sub>4</sub> added (MBq) | Reaction Buffer (pH 6.8 - 7.2) | Reaction Temperature (°C) | Reaction Time (min) | Radiochemical Yield by Radio-ITLC (%) |
|--------------------|--------------------------------------------------|--------------------------------|---------------------------|---------------------|---------------------------------------|
| PCTA<br>(7-10 µg)  | 18.5                                             | 1 M NH <sub>4</sub> OAc        | 37                        | 60                  | 77.7 ± 0.9                            |
|                    | 19.1                                             | 1 M NaOAc                      | 37                        | 60                  | 59.1 ± 1.1                            |
|                    | 18.3                                             | 1 M TRIS                       | 37                        | 60                  | 27.2 ± 1.3                            |
|                    | 18.4                                             | 1 M TMAA                       | 37                        | 60                  | 15.9 ± 0.8                            |
|                    | 19.2                                             | 0.5 M MES                      | 37                        | 60                  | 93.1 ± 0.7                            |
|                    | <b>18.8</b>                                      | <b>0.5 M HEPES</b>             | <b>37</b>                 | <b>60</b>           | <b>99.9 ± 0.1</b>                     |
|                    | 18.5                                             | 0.5 M HEPES                    | 24                        | 60                  | 70.8 ± 0.5                            |
|                    | 18.4                                             | 0.5 M HEPES                    | 24                        | 120                 | 92.3 ± 0.6                            |

<sup>a</sup>PCTA ligand (7-10 µg) was labeled with [<sup>89</sup>Zr]ZrCl<sub>4</sub> (18.3 – 19.2 MBq) using buffers (200 µL, pH 6.8 - 7.2) at 24°C or 37 °C for 60-120 min.

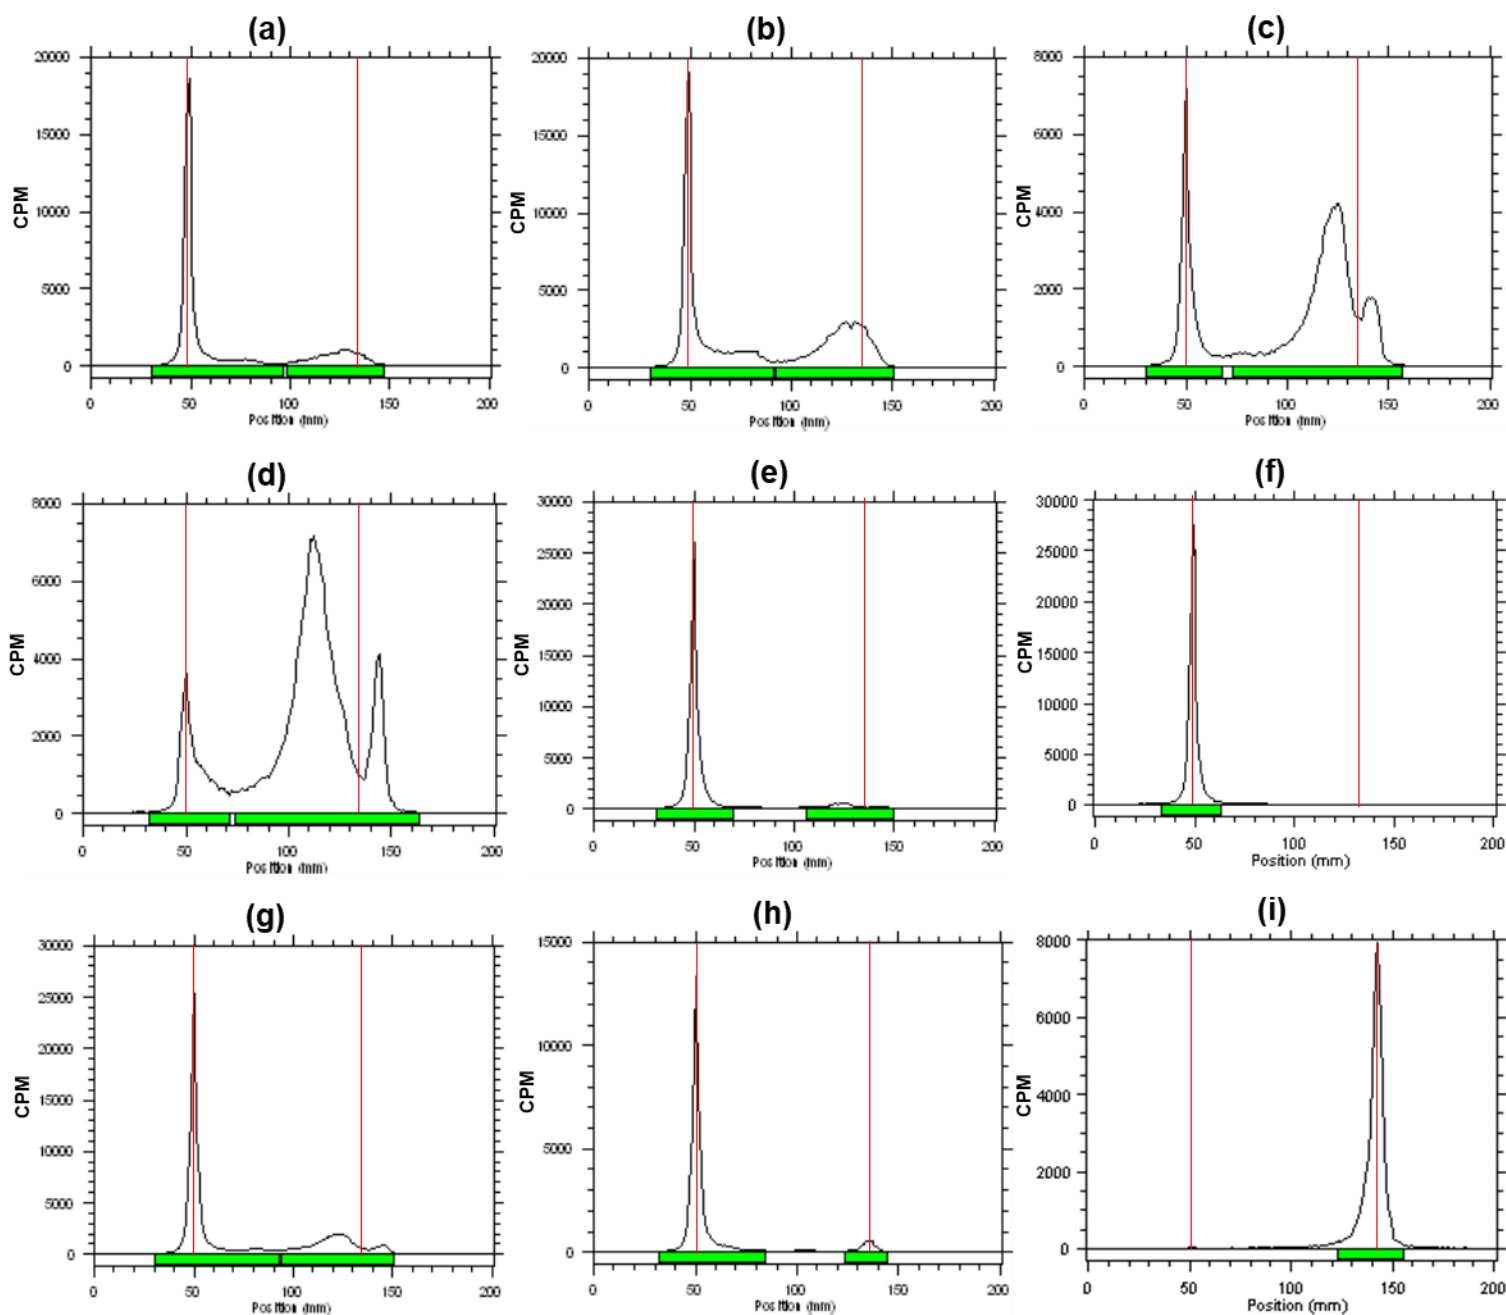

**Figure S43. Radio-TLC analysis of  $[^{89}\text{Zr}]\text{Zr-PCTA}$  prepared by using different buffers at 24 °C or 37 °C for 60-120 min.** (a) 1 M  $\text{NH}_4\text{OAc}$ , 37 °C, 60 min; (b) 1 M  $\text{NaOAc}$ , 37 °C, 60 min; (c) 1 M  $\text{TRIS}$ , 37 °C, 60 min; (d) 1 M  $\text{TMAA}$ , 37 °C, 60 min; (e) 0.5 M  $\text{MES}$ , 37 °C, 60 min; (f) 0.5 M  $\text{HEPES}$ , 37 °C, 60 min; (g) 0.5 M  $\text{HEPES}$ , 24 °C, 60 min; (h) 0.5 M  $\text{HEPES}$ , 24 °C, 120 min; (i)  $[^{89}\text{Zr}]\text{ZrCl}_4$ . In this ITLC-SA system, free  $^{89}\text{Zr}$  formed a complex with EDTA and eluted with the solvent front ( $R_f \sim 1$ ), while  $[^{89}\text{Zr}]\text{Zr-PCTA}$  complex remained at the origin ( $R_f \sim 0$ ).

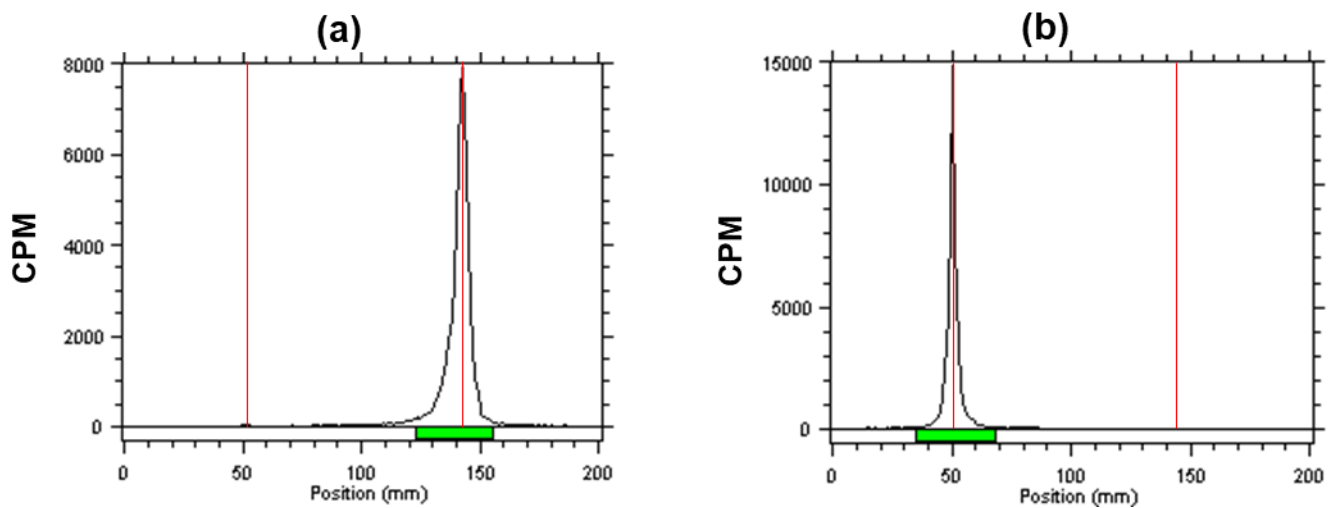

Figure S44. Quality control of  $[^{89}\text{Zr}]\text{Zr-PCTA}$  by radio-TLC. ITLC-SA of  $[^{89}\text{Zr}]\text{ZrCl}_4$  (a),  $[^{89}\text{Zr}]\text{Zr-PCTA}$  (b)

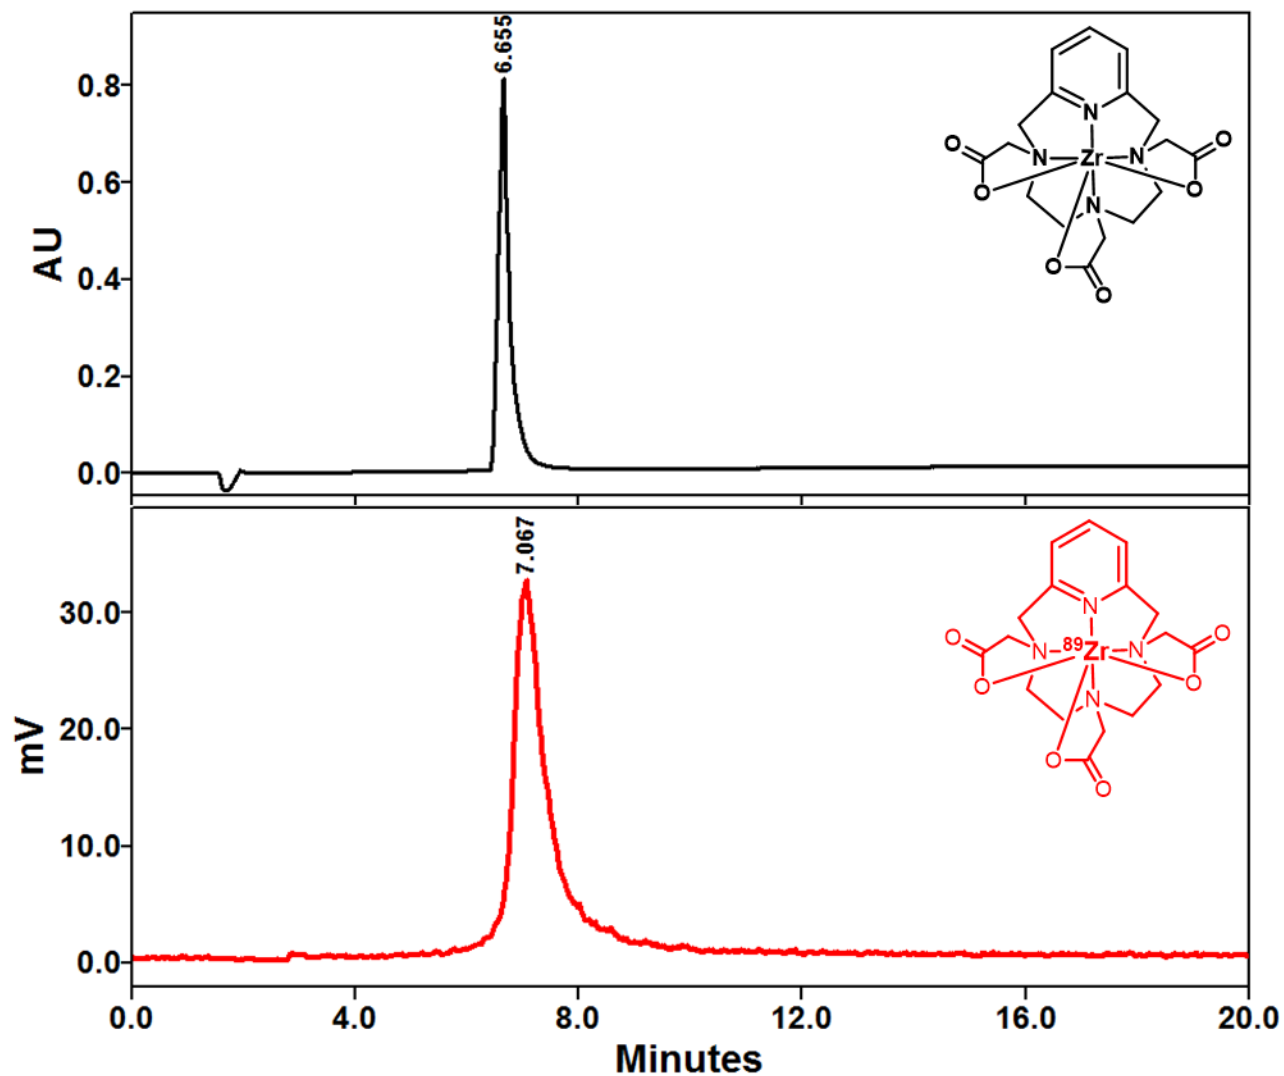

**Figure S45. Quality control of  $[^{89}\text{Zr}]\text{Zr-PCTA}$  by radio-HPLC.** UV-HPLC chromatogram (201 nm) of nonradioactive  $^{\text{Nat}}\text{Zr-PCTA}$  complex (top) compared with radio-HPLC chromatogram of  $[^{89}\text{Zr}]\text{Zr-PCTA}$  (bottom)

## Radiochemical Synthesis of [<sup>89</sup>Zr]Zr-NOTA with [<sup>89</sup>Zr]ZrCl<sub>4</sub>:

Table S18. Summary of optimized radiochemistry conditions and [<sup>89</sup>Zr]ZrCl<sub>4</sub> activity used to prepare [<sup>89</sup>Zr]Zr-NOTA<sup>a</sup> complex (n = 4 for each buffer)

| Quantity of Ligand | [ <sup>89</sup> Zr]ZrCl <sub>4</sub> added (MBq) | Reaction Buffer (pH 6.8 – 7.2) | Reaction Temperature (°C) | Reaction Time (min) | Radiochemical Yield by Radio-ITLC (%) |
|--------------------|--------------------------------------------------|--------------------------------|---------------------------|---------------------|---------------------------------------|
| NOTA<br>(7-10 µg)  | 18.1                                             | 1 M NH <sub>4</sub> OAc        | 37                        | 60                  | 62.7 ± 1.2                            |
|                    | 18.4                                             | 1 M NaOAc                      | 37                        | 60                  | 30.2 ± 1.8                            |
|                    | 17.9                                             | 1 M TRIS                       | 37                        | 60                  | 20.5 ± 1.5                            |
|                    | 18.0                                             | 1 M TMAA                       | 37                        | 60                  | 2.2 ± 0.6                             |
|                    | 18.5                                             | 0.5 M MES                      | 37                        | 60                  | 74.5 ± 0.7                            |
|                    | <b>19.1</b>                                      | <b>0.5 M HEPES</b>             | <b>37</b>                 | <b>60</b>           | <b>99.8 ± 0.2</b>                     |
|                    | 18.7                                             | 0.5 M HEPES                    | 24                        | 60                  | 66.7 ± 1.1                            |
|                    | 18.9                                             | 0.5 M HEPES                    | 24                        | 120                 | 85.4 ± 0.3                            |

<sup>a</sup>NOTA ligand (7-10 µg) was labeled with [<sup>89</sup>Zr]ZrCl<sub>4</sub> (17.9 – 19.1 MBq) using buffers (200 µL, pH 6.8 – 7.2) at 24°C or 37 °C for 60-120 min.

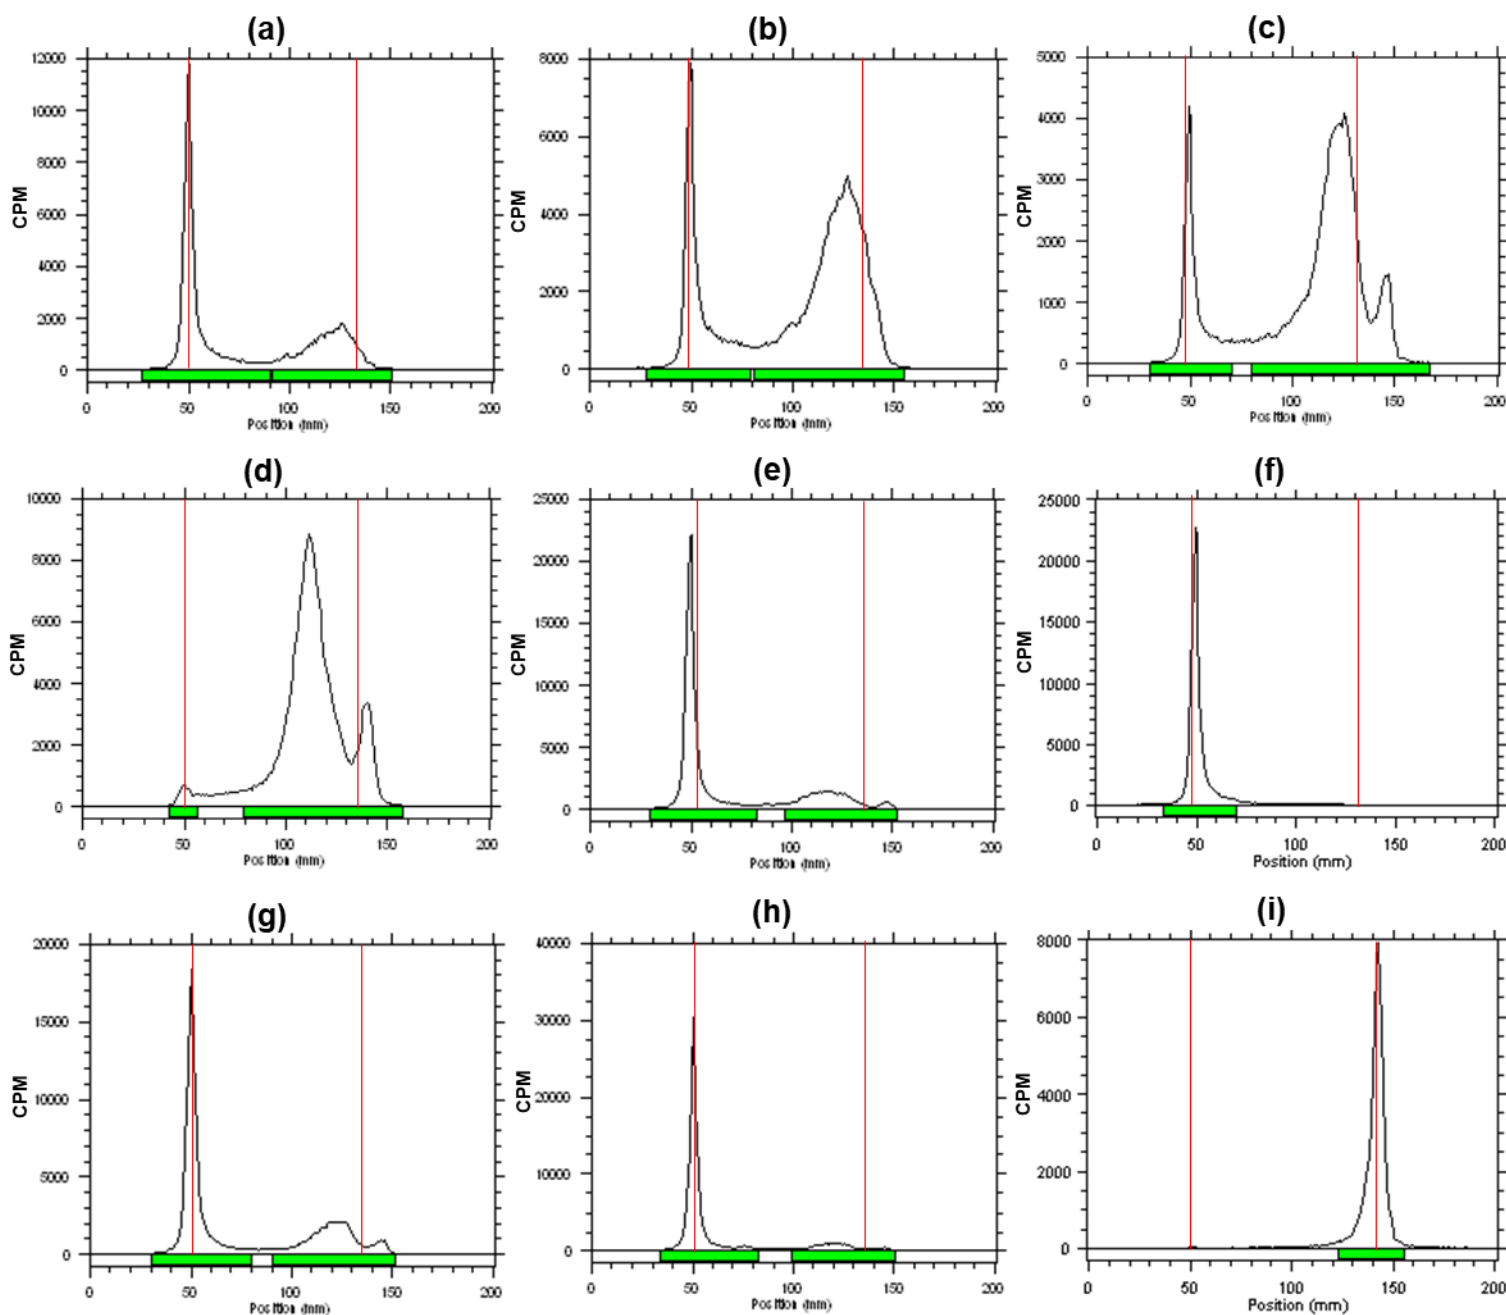

**Figure S46. Radio-TLC analysis of  $[^{89}\text{Zr}]\text{Zr-NOTA}$  prepared by using different buffers at 24 °C or 37 °C for 60-120 min.** (a) 1 M  $\text{NH}_4\text{OAc}$ , 37 °C, 60 min; (b) 1 M  $\text{NaOAc}$ , 37 °C, 60 min; (c) 1 M  $\text{TRIS}$ , 37 °C, 60 min; (d) 1 M  $\text{TMAA}$ , 37 °C, 60 min; (e) 0.5 M  $\text{MES}$ , 37 °C, 60 min; (f) 0.5 M  $\text{HEPES}$ , 37 °C, 60 min; (g) 0.5 M  $\text{HEPES}$ , 24 °C, 60 min; (h) 0.5 M  $\text{HEPES}$ , 24 °C, 120 min; (i)  $[^{89}\text{Zr}]\text{ZrCl}_4$ . In this ITLC-SA system, free  $^{89}\text{Zr}$  formed a complex with EDTA and eluted with the solvent front ( $R_f \sim 1$ ), while  $[^{89}\text{Zr}]\text{Zr-NOTA}$  complex remained at the origin ( $R_f \sim 0$ ).

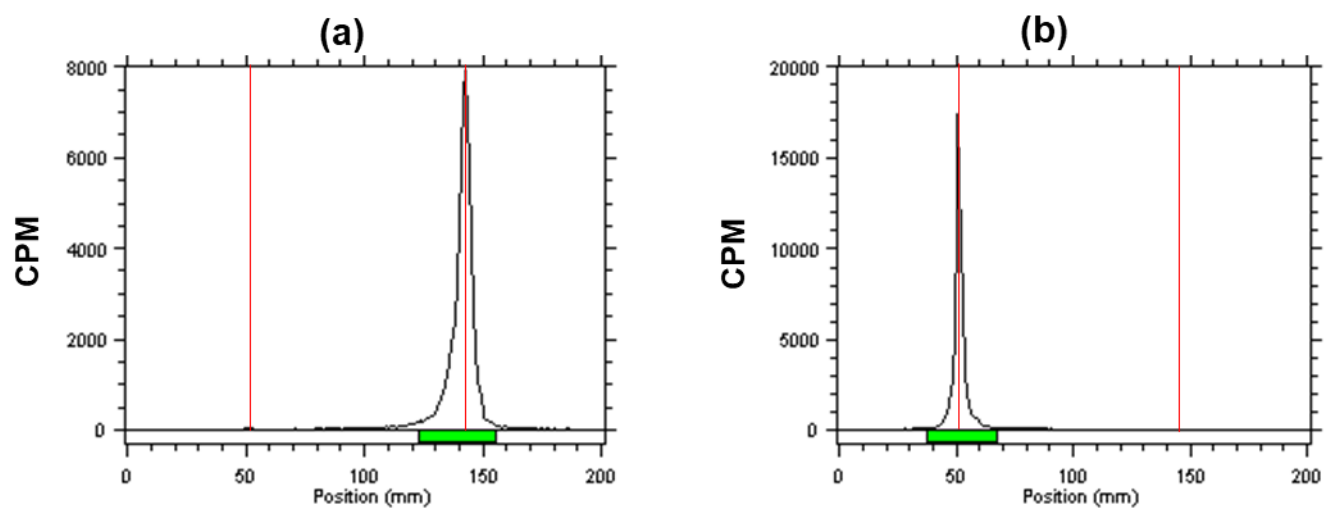

Figure S47. Quality control of  $[^{89}\text{Zr}]\text{Zr-NOTA}$  by radio-TLC. ITLC-SA of  $[^{89}\text{Zr}]\text{ZrCl}_4$  (a),  $[^{89}\text{Zr}]\text{Zr-NOTA}$  (b)



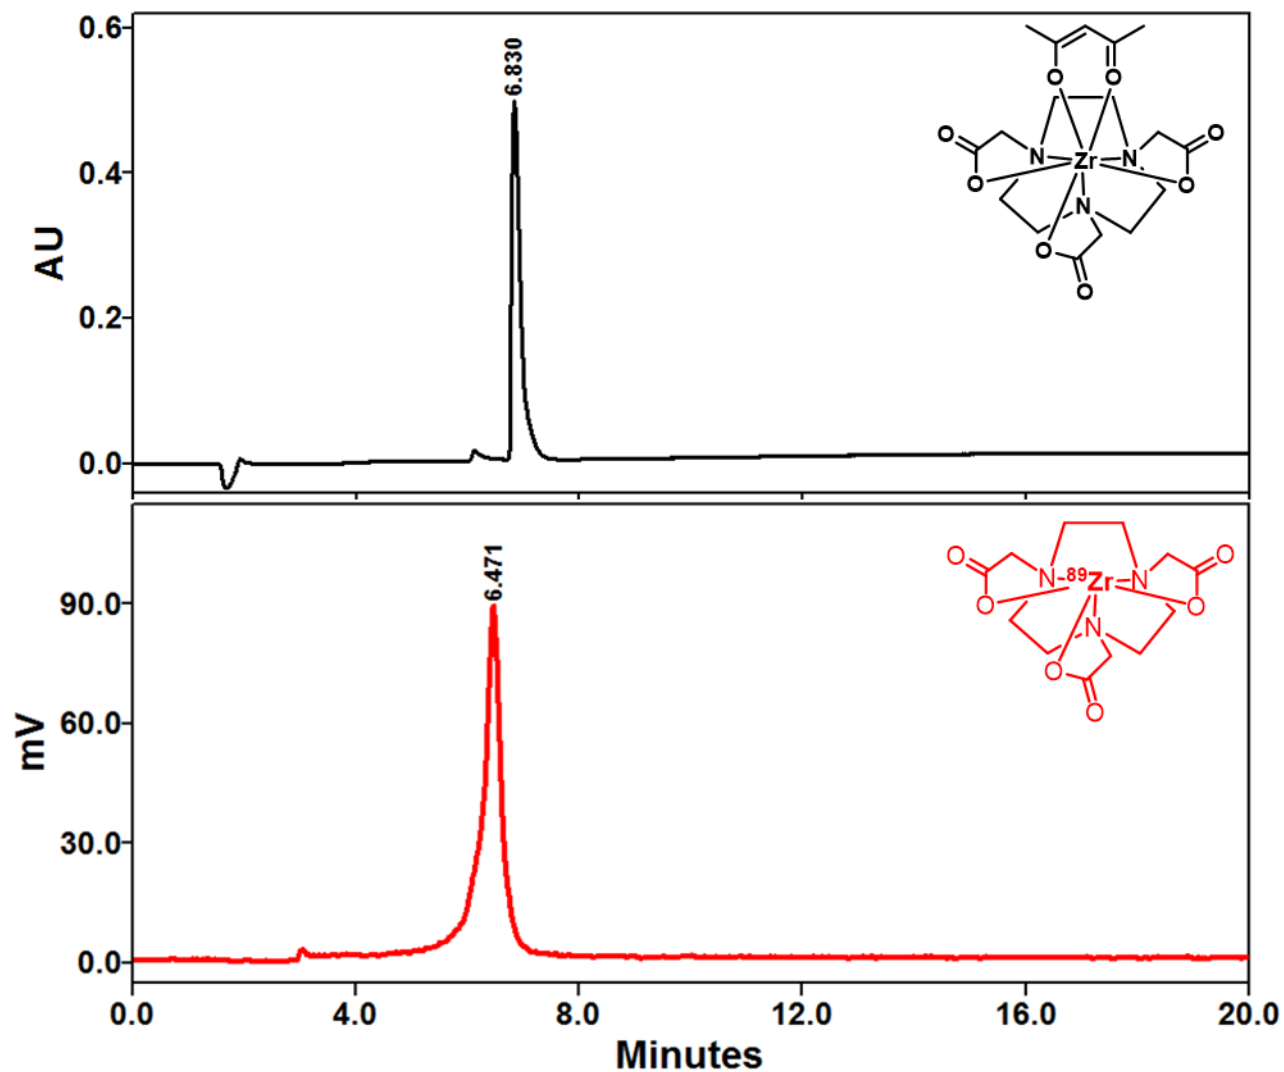

Figure S48. Quality control of  $^{89}\text{Zr}$ ]Zr-NOTA by radio-HPLC. UV-HPLC chromatogram (201 nm) of nonradioactive  $^{\text{Nat}}\text{Zr}$ -NOTA complex (top) compared with radio-HPLC chromatogram of  $^{89}\text{Zr}$ ]Zr-NOTA (bottom)

## Radiochemical Synthesis of [<sup>89</sup>Zr]Zr-TRITA with [<sup>89</sup>Zr]ZrCl<sub>4</sub>:

**Table S19. Conventional Heating: Summary of optimized radiochemistry conditions and [<sup>89</sup>Zr]ZrCl<sub>4</sub> activity used to prepare [<sup>89</sup>Zr]Zr-TRITA<sup>a</sup> complex (n = 4 for each buffer)**

| Quantity of Ligand  | [ <sup>89</sup> Zr]ZrCl <sub>4</sub> added (MBq) | Reaction Buffer (pH 6.8 – 7.2) | Reaction Temperature (°C) | Reaction Time (min) | Radiochemical Yield by Radio-ITLC (%) |
|---------------------|--------------------------------------------------|--------------------------------|---------------------------|---------------------|---------------------------------------|
| TRITA<br>(10-15 µg) | 17.3                                             | 1 M NH <sub>4</sub> OAc        | 99                        | 60                  | 56.7 ± 2.1                            |
|                     | 17.9                                             | 1 M NaOAc                      | 99                        | 60                  | 43.2 ± 1.3                            |
|                     | 17.5                                             | 1 M TRIS                       | 99                        | 60                  | 22.2 ± 2.3                            |
|                     | 17.1                                             | 1 M TMAA                       | 99                        | 60                  | 16.8 ± 1.4                            |
|                     | 17.4                                             | 0.5 M MES                      | 99                        | 60                  | 62.9 ± 0.9                            |
|                     | 18.0                                             | 0.5 M MES                      | 99                        | 120                 | 78.7 ± 1.5                            |
|                     | 17.7                                             | 0.5 M HEPES                    | 99                        | 60                  | 66.8 ± 1.1                            |
|                     | <b>18.1</b>                                      | <b>0.5 M HEPES</b>             | <b>99</b>                 | <b>120</b>          | <b>80.1 ± 1.2</b>                     |

<sup>a</sup>TRITA ligand (10-15 µg) was labeled with [<sup>89</sup>Zr]ZrCl<sub>4</sub> (17.1 – 18.1 MBq) using buffers (200 µL, pH 6.8 – 7.2) at 99 °C for 60–120 min.

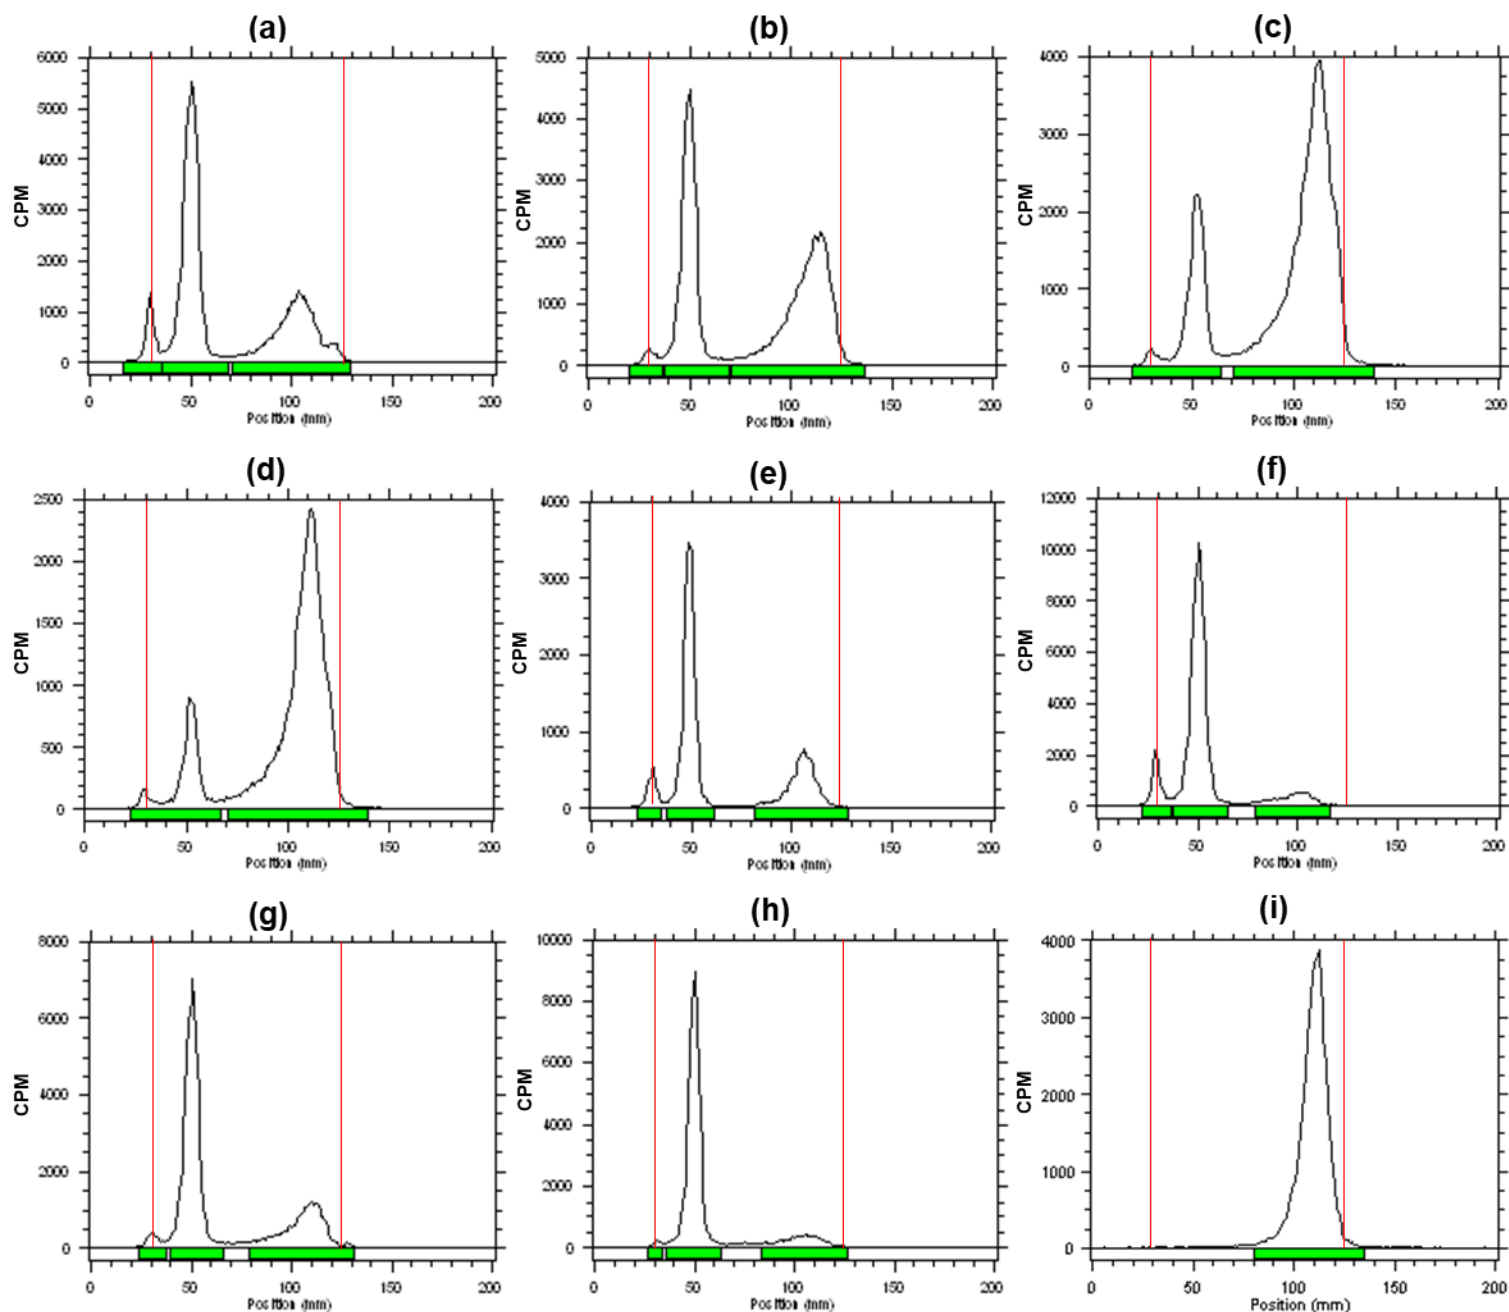

**Figure S49. Conventional Heating: Radio-TLC analysis of  $[^{89}\text{Zr}]\text{Zr-TRITA}$  prepared by using different buffers at 99 °C for 60–120 min.** (a) 1 M  $\text{NH}_4\text{OAc}$ , 99 °C, 60 min; (b) 1 M  $\text{NaOAc}$ , 99 °C, 60 min; (c) 1 M  $\text{TRIS}$ , 99 °C, 60 min; (d) 1 M  $\text{TMAA}$ , 99 °C, 60 min; (e) 0.5 M  $\text{MES}$ , 99 °C, 60 min; (f) 0.5 M  $\text{MES}$ , 99 °C, 120 min; (g) 0.5 M  $\text{HEPES}$ , 99 °C, 60 min; (h) 0.5 M  $\text{HEPES}$ , 99 °C, 120 min; (i)  $[^{89}\text{Zr}]\text{ZrCl}_4$ . In this ITLC-SA system, free  $^{89}\text{Zr}$  formed a complex with EDTA and eluted with the solvent front ( $R_f \sim 1$ ),  $[^{89}\text{Zr}]\text{Zr-TRITA}$  complex moved from origin ( $R_f = 0.20-0.25$ ).

**Table S20. Microwave Heating: Summary of optimized radiochemistry conditions and [<sup>89</sup>Zr]ZrCl<sub>4</sub> activity used to prepare [<sup>89</sup>Zr]Zr-TRITA<sup>a</sup> complex (n = 4 for each buffer)**

| Quantity of Ligand  | [ <sup>89</sup> Zr]ZrCl <sub>4</sub> added (MBq) | Final Reaction pH | Reaction Temperature (°C) | Reaction Time (min) | Radiochemical Yield by Radio-ITLC (%) |
|---------------------|--------------------------------------------------|-------------------|---------------------------|---------------------|---------------------------------------|
| TRITA<br>(10-12 µg) | 15.4                                             | 6.8-7.2           | 150                       | 30                  | 53.3 ± 1.7                            |
|                     | 15.2                                             | 5.8-6.1           | 150                       | 30                  | 75.5 ± 0.9                            |
|                     | 15.3                                             | 4.9-5.1           | 150                       | 30                  | 89.5 ± 0.8                            |
|                     | 15.1                                             | 3.8-4.2           | 150                       | 30                  | 93.1 ± 0.6                            |
|                     | 15.6                                             | 2.9-3.2           | 150                       | 30                  | 85.5 ± 1.3                            |
|                     | 15.7                                             | 3.8-4.1           | 170                       | 30                  | 98.5 ± 0.3                            |
|                     | <b>15.5</b>                                      | <b>3.9-4.2</b>    | <b>180</b>                | <b>20</b>           | <b>99.9 ± 0.1</b>                     |

<sup>a</sup>TRITA ligand (10-12 µg) was labeled with [<sup>89</sup>Zr]ZrCl<sub>4</sub> (15.1 – 15.7 MBq) using 0.5 M HEPES buffer (50-70 µL, pH 7.1 -7.3) in Biotage Initiator microwave synthesizer at 150-180 °C for 20-30 min.

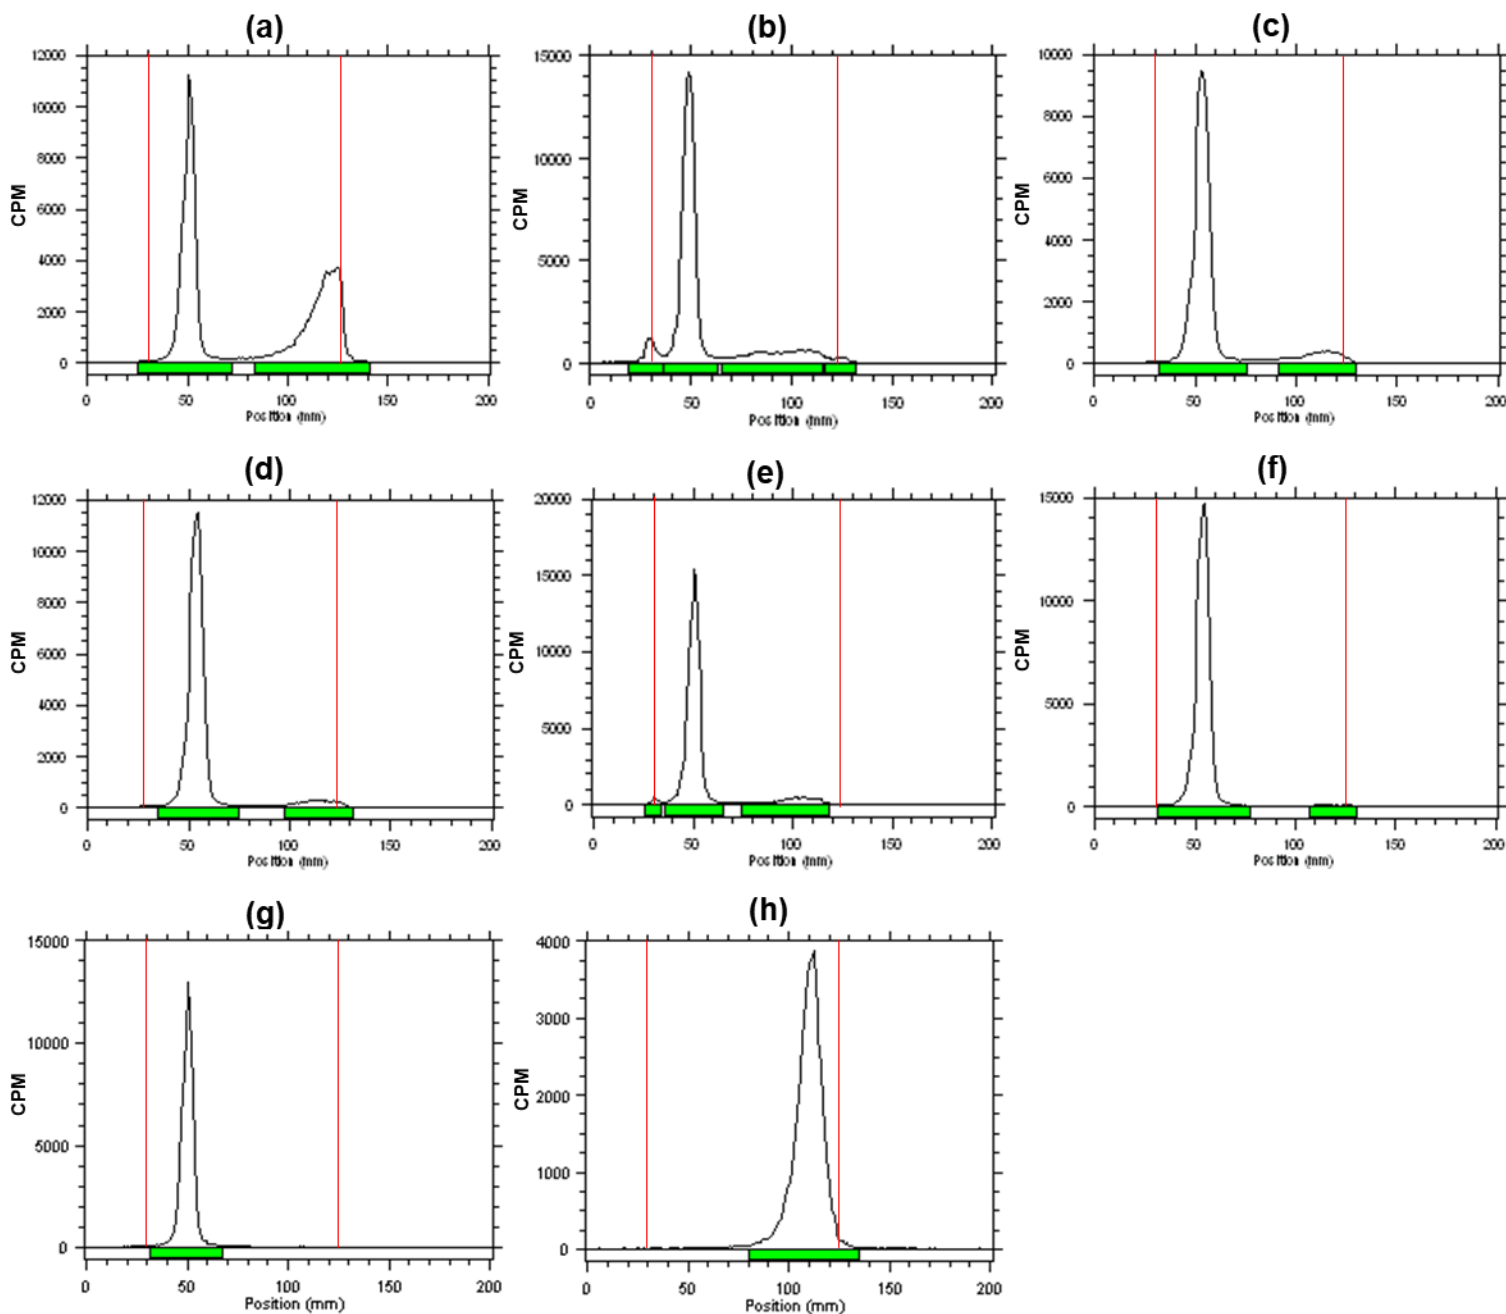

**Figure S50. Microwave Heating: Radio-TLC analysis of  $[^{89}\text{Zr}]\text{Zr-TRITA}$  prepared with different reaction pH (7.2-2.9) at 150-180 °C for 20-30 min. (a) pH 6.8-7.2, 150 °C, 30 min; (b) pH 5.8-6.1, 150 °C, 30 min; (c) pH 4.9-5.1, 150 °C, 30 min; (d) pH 3.8-4.2, 150 °C, 30 min; (e) pH 2.9-3.2, 150 °C, 30 min; (f) pH 3.8-4.1, 170 °C, 30 min; (g) pH 3.9-4.2, 180 °C, 30 min; (h)  $[^{89}\text{Zr}]\text{ZrCl}_4$ . In this ITLC-SA system, free  $^{89}\text{Zr}$  formed a complex with EDTA and eluted with the solvent front ( $R_f \sim 1$ ),  $[^{89}\text{Zr}]\text{Zr-TRITA}$  complex moved from origin ( $R_f = 0.20-0.25$ ).**

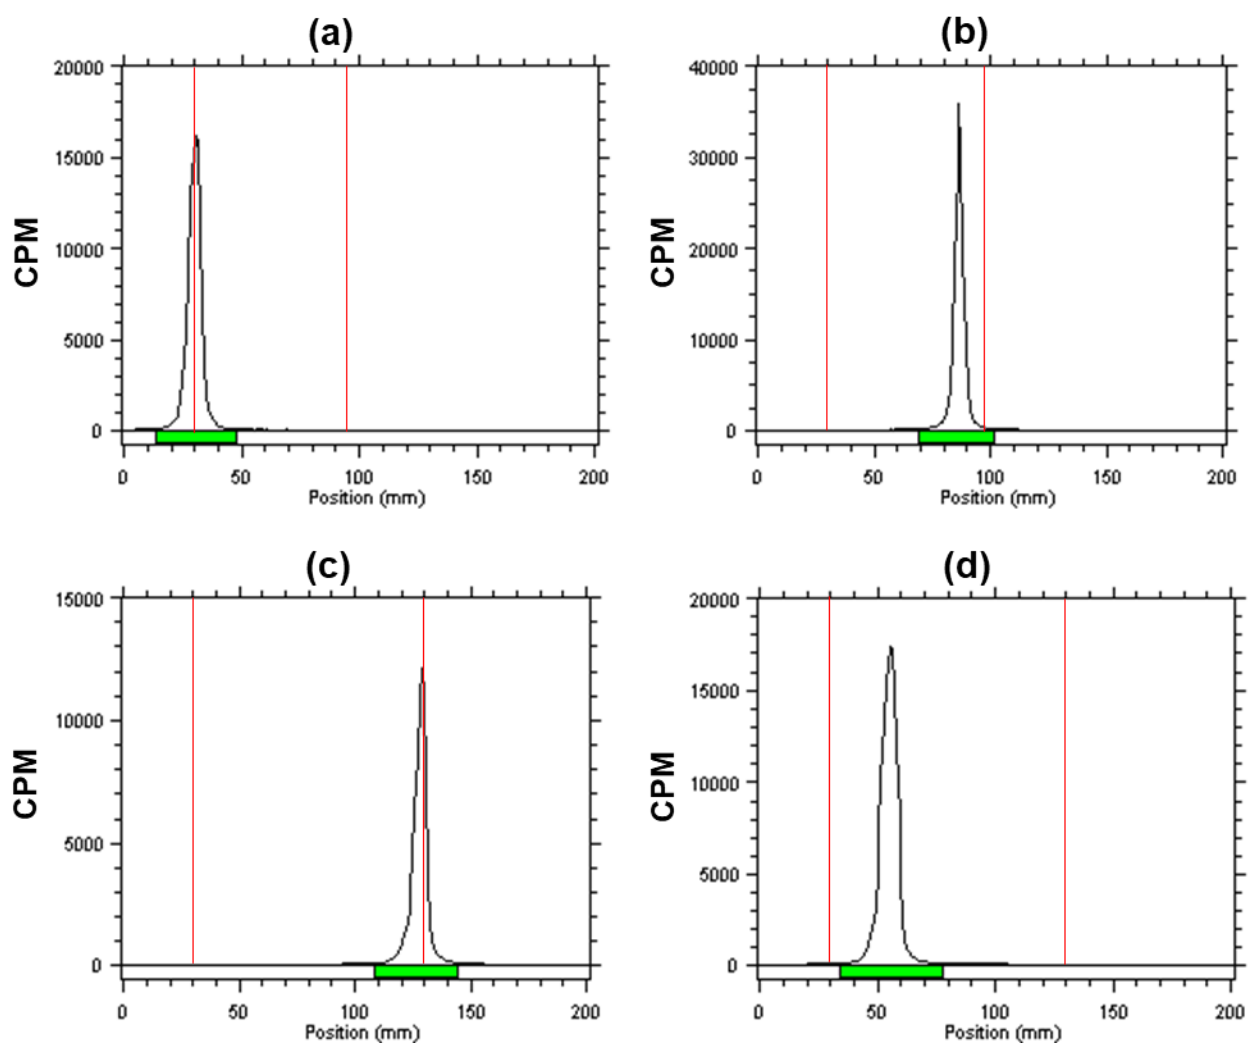

**Figure S51. Quality control of  $[^{89}\text{Zr}]\text{Zr-TRITA}$  by radio-TLC. C-18-TLC of  $[^{89}\text{Zr}]\text{ZrCl}_4$  (a),  $[^{89}\text{Zr}]\text{Zr-TRITA}$  (b), and ITLC-SA of  $[^{89}\text{Zr}]\text{ZrCl}_4$  (c),  $[^{89}\text{Zr}]\text{Zr-TRITA}$  (d)**

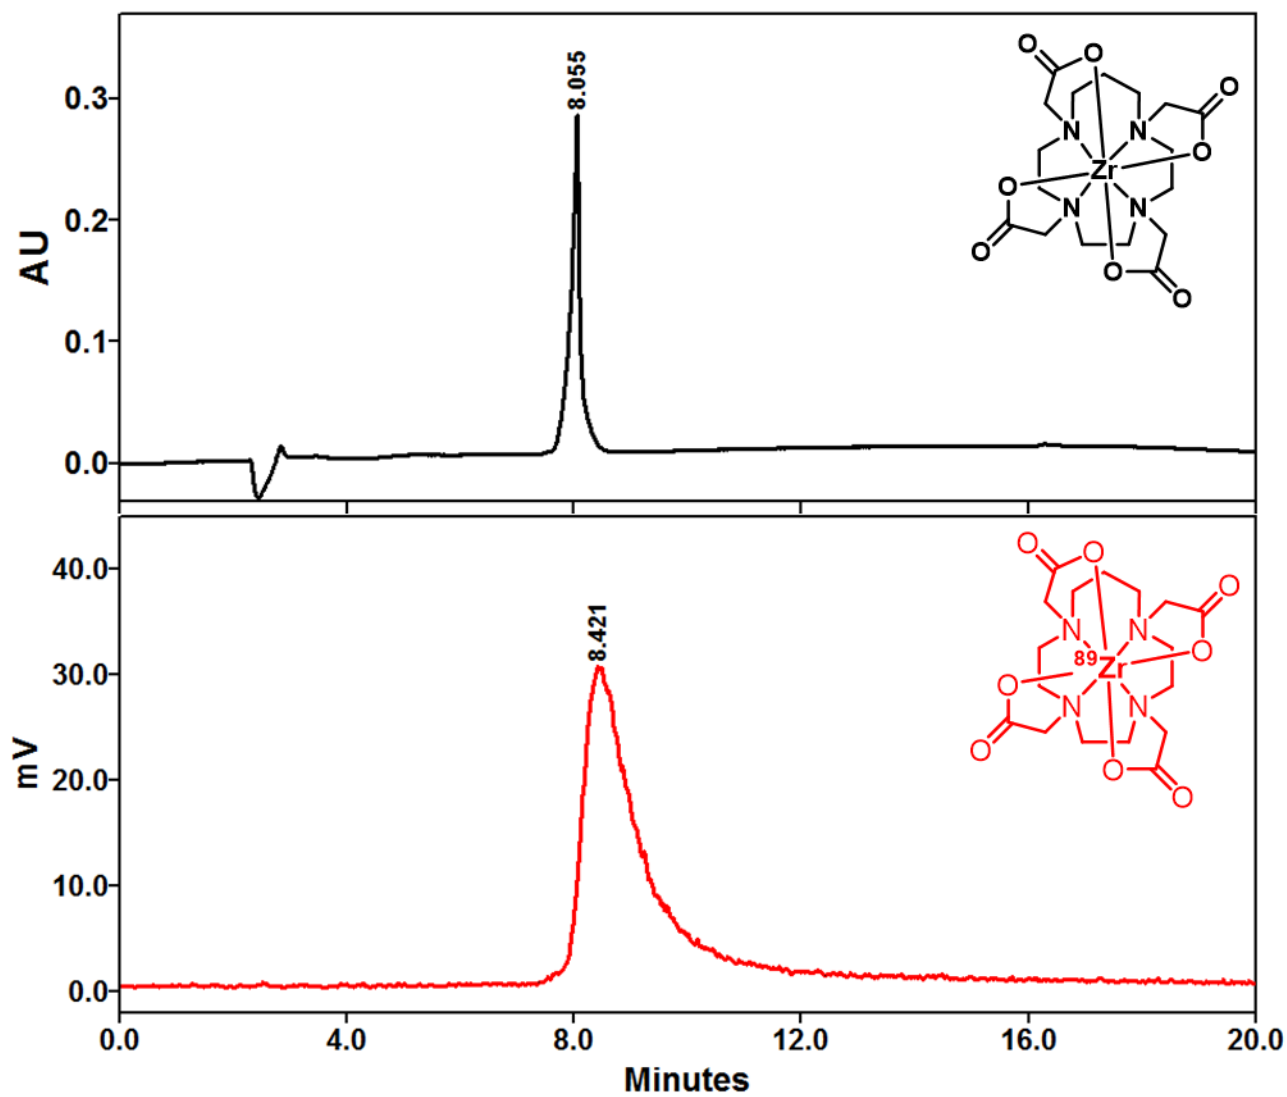

**Figure S52. Quality control of [ $^{89}\text{Zr}$ ]Zr-TRITA by radio-HPLC.** UV-HPLC chromatogram (201 nm) of nonradioactive  $^{\text{Nat}}\text{Zr}$ -TRITA complex (top) compared with radio-HPLC chromatogram of [ $^{89}\text{Zr}$ ]Zr-TRITA (bottom)

## Radiochemical Synthesis of [<sup>89</sup>Zr]Zr-TETA with [<sup>89</sup>Zr]ZrCl<sub>4</sub>:

**Table S21. Summary of optimized radiochemistry conditions and [<sup>89</sup>Zr]ZrCl<sub>4</sub> activity used to prepare [<sup>89</sup>Zr]Zr-TETA<sup>a</sup> complex (n = 4 for each buffer)**

| Quantity of Ligand | [ <sup>89</sup> Zr]ZrCl <sub>4</sub> added (MBq) | Reaction Buffer (pH 6.8 - 7.2) | Reaction Temperature (°C) | Reaction Time (min) | Radiochemical Yield by Radio-ITLC (%) |
|--------------------|--------------------------------------------------|--------------------------------|---------------------------|---------------------|---------------------------------------|
| TETA<br>(10-50 µg) | 16.6                                             | 1 M NH <sub>4</sub> OAc        | 99                        | 120                 | 0                                     |
|                    | 16.8                                             | 1 M NaOAc                      | 99                        | 120                 | 0                                     |
|                    | 17.5                                             | 1 M TRIS                       | 99                        | 120                 | 0                                     |
|                    | 19.2                                             | 0.5 M MES                      | 99                        | 120                 | 0                                     |
|                    | 18.7                                             | 0.5 M HEPES                    | 99                        | 120                 | 0.5 ± 0.1                             |
|                    | 20.5                                             | 0.5 M HEPES                    | 180 <sup>b</sup>          | 30                  | 1.5 ± 0.3                             |

<sup>a</sup>TETA ligand (10-50 µg) was labeled with [<sup>89</sup>Zr]ZrCl<sub>4</sub> (16.6 – 20.5 MBq) using buffers (200 µL, pH 6.8 - 7.2) at 99 °C for 120 min.

<sup>b</sup>TETA ligand (10-50 µg) was labeled with [<sup>89</sup>Zr]ZrCl<sub>4</sub> (20.5 MBq) using 0.5 M HEPES buffer (50-70 µL, pH 7.1 - 7.3) in Biotage Initiator microwave synthesizer at 180 °C for 30 min.



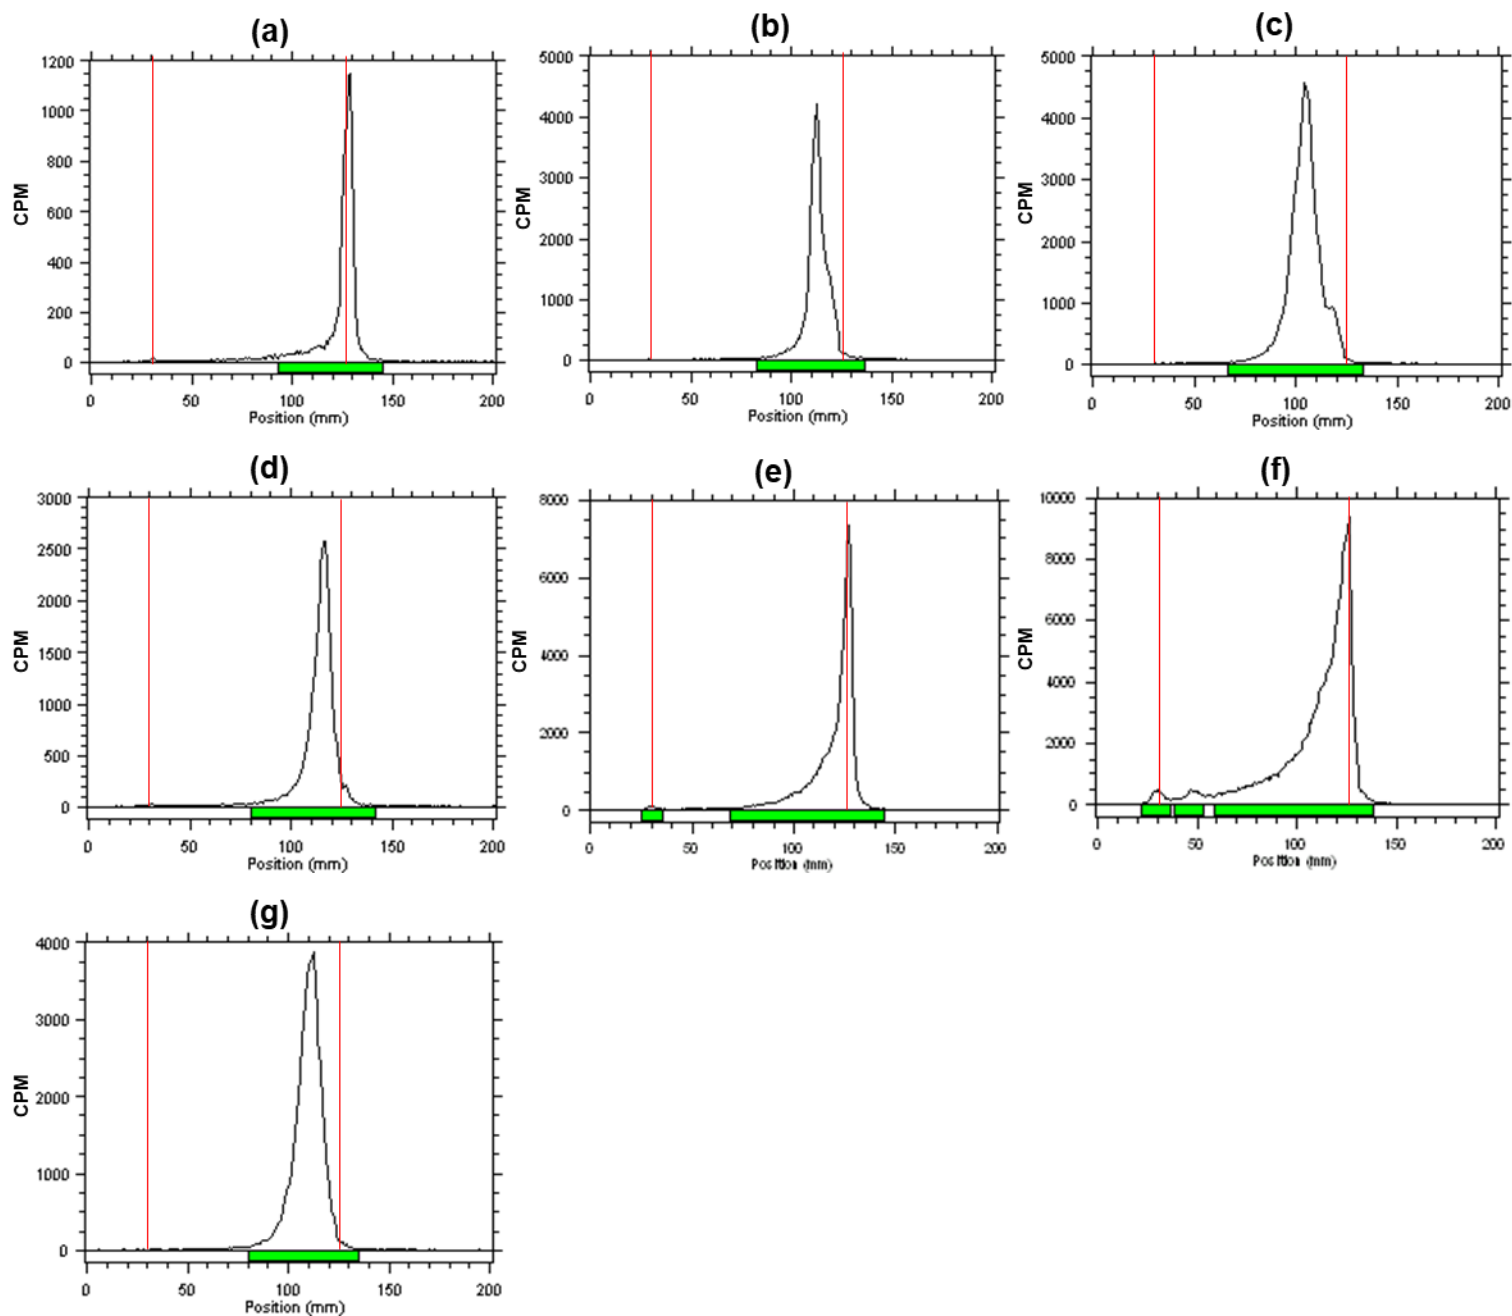

**Figure S53. Radio-TLC analysis of  $[^{89}\text{Zr}]\text{Zr-TETA}$  prepared by using different buffers at 99 °C for 120 min.** (a) 1 M  $\text{NH}_4\text{OAc}$ ; (b) 1 M  $\text{NaOAc}$ ; (c) 1 M  $\text{TRIS}$ ; (d) 0.5 M  $\text{MES}$ ; (e) 0.5 M  $\text{HEPS}$  (Conventional heating); (f) 0.5 M  $\text{HEPES}$  (Microwave heating); (g)  $[^{89}\text{Zr}]\text{ZrCl}_4$ . In this ITLC-SA system, free  $^{89}\text{Zr}$  formed a complex with EDTA and eluted with the solvent front ( $R_f \sim 1$ ), while  $[^{89}\text{Zr}]\text{Zr-TETA}$  complex remained at the origin ( $R_f \sim 0$ )

**Table S22. Log P<sup>7</sup> values for all [<sup>89</sup>Zr]Zr-complexes**

| <b>Complex</b>              | <b>Log P (n=5)</b> |
|-----------------------------|--------------------|
| [ <sup>89</sup> Zr]Zr-PCTA  | -3.09 ± 0.03       |
| [ <sup>89</sup> Zr]Zr-NOTA  | -2.51 ± 0.01       |
| [ <sup>89</sup> Zr]Zr-TRITA | -3.13 ± 0.02       |

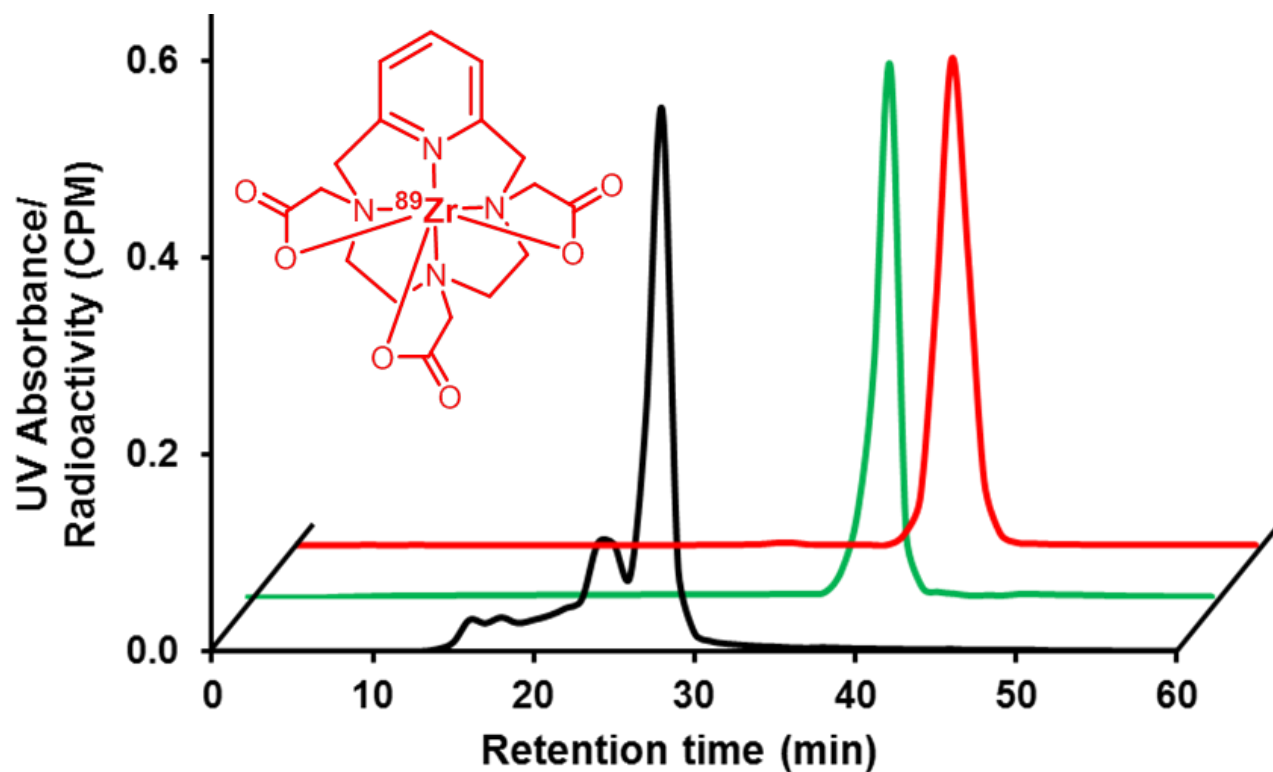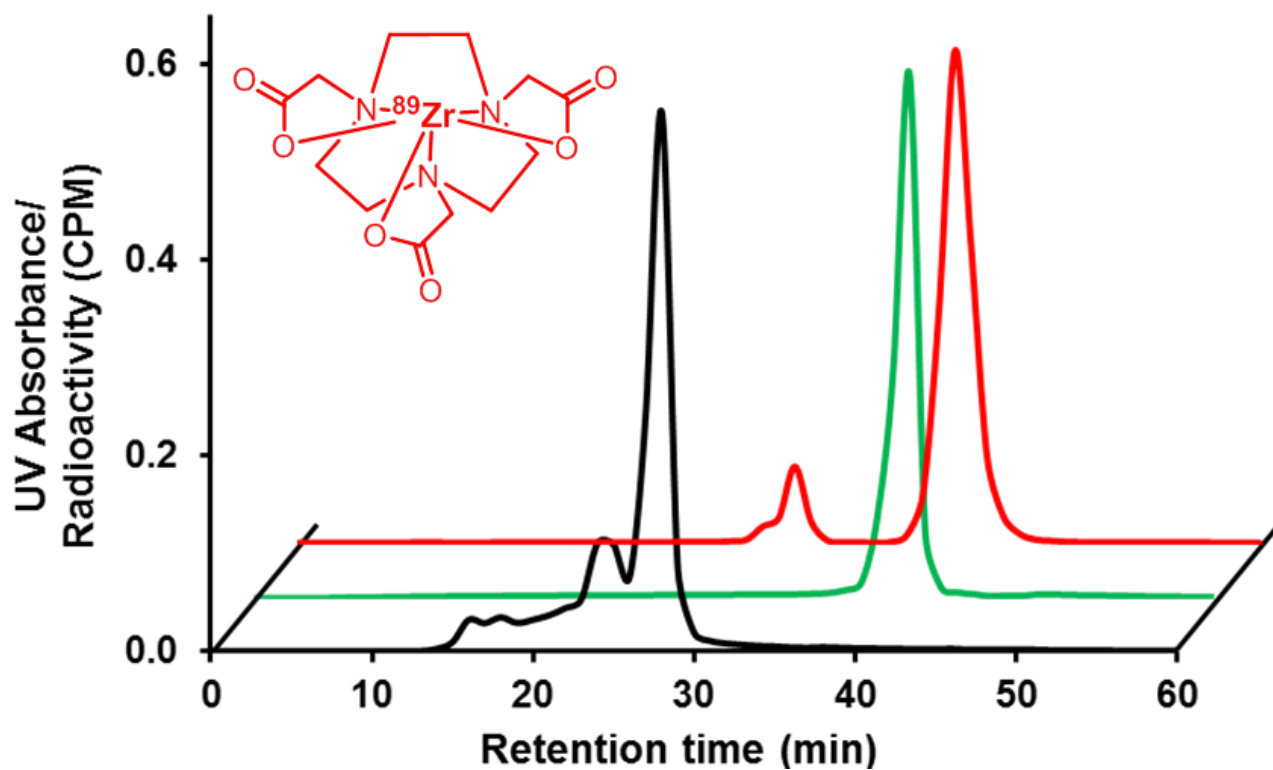

**Figure S54. *In vitro* serum stability by SE-HPLC<sup>8</sup>.** UV-SE-HPLC (220 nm, black, and green) and radio-SE-HPLC chromatogram (red) of [<sup>89</sup>Zr]Zr-PCTA (top), and [<sup>89</sup>Zr]Zr-NOTA (bottom) in serum after 7 days. Black lines are the UV absorbance due to the human serum components; green lines are the UV absorbance associated with <sup>Nat</sup>Zr-complexes and red lines are the radiotracer associated with [<sup>89</sup>Zr]Zr-complexes.

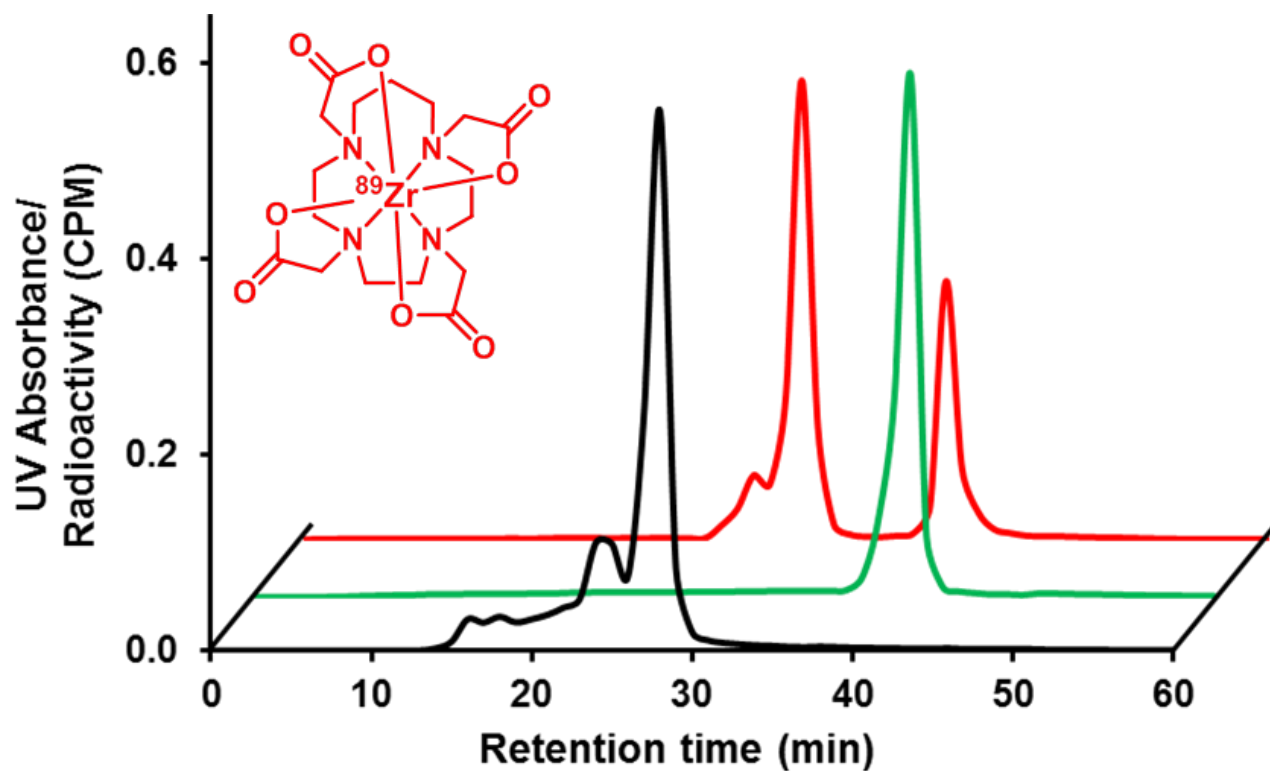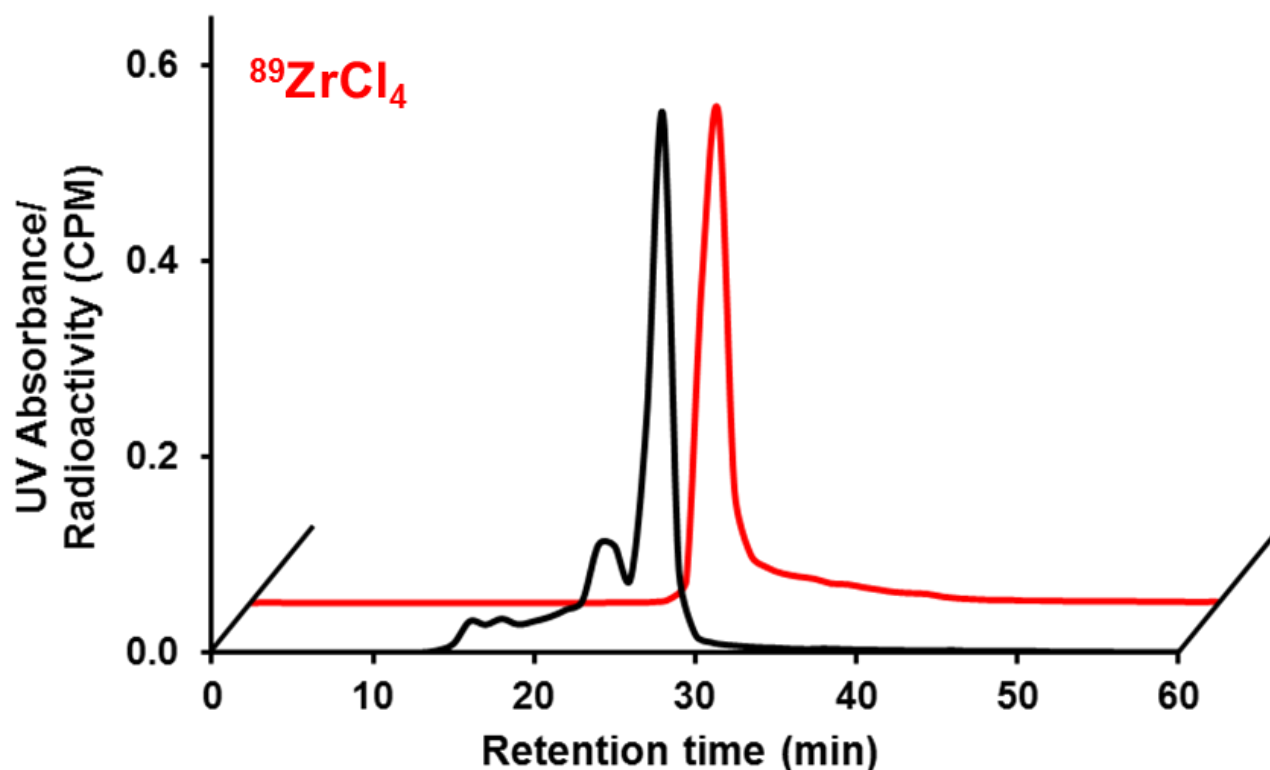

**Figure S55. *In vitro* serum stability by SE-HPLC<sup>8</sup>.** UV-SE-HPLC (220 nm, black, and green) and radio-SE-HPLC chromatogram (red) of  $^{89}\text{Zr}$ ]-Zr-TRITA (top), and  $^{89}\text{Zr}$ ]-ZrCl<sub>4</sub> (bottom) in serum after 7 days. Black lines are the UV absorbance due to the human serum components; green lines are the UV absorbance associated with <sup>Nat</sup>Zr-complexes and red lines are the radiotracer associated with <sup>89</sup>Zr-complexes.

**Table S23. Biodistribution (%ID/g)<sup>9-10</sup> of [<sup>89</sup>Zr]Zr-PCTA in selected organs at 2, 4, 24, 48, and 72 h p.i.**

| Tissue/Organ    | 2 h           | 4 h           | 24 h          | 48 h          | 72 h          |
|-----------------|---------------|---------------|---------------|---------------|---------------|
| Blood           | 0.013 ± 0.003 | 0.008 ± 0.002 | 0.002 ± 0.001 | 0.000 ± 0.001 | 0.000 ± 0.001 |
| Heart           | 0.024 ± 0.003 | 0.020 ± 0.004 | 0.010 ± 0.003 | 0.008 ± 0.002 | 0.007 ± 0.002 |
| Lung            | 0.061 ± 0.006 | 0.052 ± 0.005 | 0.026 ± 0.003 | 0.017 ± 0.002 | 0.014 ± 0.003 |
| Liver           | 0.131 ± 0.005 | 0.104 ± 0.010 | 0.056 ± 0.003 | 0.037 ± 0.004 | 0.030 ± 0.003 |
| Small intestine | 0.122 ± 0.023 | 0.058 ± 0.016 | 0.012 ± 0.001 | 0.006 ± 0.001 | 0.004 ± 0.000 |
| Large intestine | 0.193 ± 0.060 | 0.413 ± 0.061 | 0.037 ± 0.008 | 0.011 ± 0.003 | 0.006 ± 0.001 |
| Kidney          | 0.722 ± 0.068 | 0.571 ± 0.050 | 0.416 ± 0.016 | 0.272 ± 0.031 | 0.151 ± 0.010 |
| Spleen          | 0.047 ± 0.007 | 0.041 ± 0.010 | 0.035 ± 0.004 | 0.026 ± 0.004 | 0.024 ± 0.003 |
| Pancreas        | 0.016 ± 0.003 | 0.015 ± 0.003 | 0.009 ± 0.002 | 0.007 ± 0.002 | 0.003 ± 0.002 |
| Stomach         | 0.027 ± 0.006 | 0.026 ± 0.005 | 0.009 ± 0.002 | 0.004 ± 0.001 | 0.003 ± 0.001 |
| Muscle          | 0.013 ± 0.004 | 0.007 ± 0.002 | 0.006 ± 0.002 | 0.002 ± 0.001 | 0.001 ± 0.001 |
| Fat             | 0.012 ± 0.001 | 0.008 ± 0.002 | 0.007 ± 0.002 | 0.006 ± 0.002 | 0.002 ± 0.002 |
| Bone            | 0.104 ± 0.015 | 0.066 ± 0.010 | 0.113 ± 0.009 | 0.105 ± 0.007 | 0.094 ± 0.006 |

**Table S24. Biodistribution (%ID/g)<sup>9-10</sup> of [<sup>89</sup>Zr]Zr-NOTA in selected organs at 2, 4, 24, 48, and 72 h p.i.**

| <b>Tissue/Organ</b> | <b>2 h</b>    | <b>4 h</b>    | <b>24 h</b>   | <b>48 h</b>   | <b>72 h</b>   |
|---------------------|---------------|---------------|---------------|---------------|---------------|
| Blood               | 0.029 ± 0.002 | 0.014 ± 0.002 | 0.003 ± 0.001 | 0.001 ± 0.000 | 0.001 ± 0.000 |
| Heart               | 0.037 ± 0.002 | 0.027 ± 0.003 | 0.015 ± 0.001 | 0.011 ± 0.002 | 0.007 ± 0.002 |
| Lung                | 0.109 ± 0.008 | 0.068 ± 0.004 | 0.034 ± 0.003 | 0.017 ± 0.002 | 0.016 ± 0.001 |
| Liver               | 0.591 ± 0.011 | 0.450 ± 0.025 | 0.158 ± 0.010 | 0.086 ± 0.007 | 0.069 ± 0.007 |
| Small intestine     | 0.304 ± 0.025 | 0.174 ± 0.021 | 0.016 ± 0.001 | 0.008 ± 0.001 | 0.006 ± 0.001 |
| Large intestine     | 0.857 ± 0.061 | 1.053 ± 0.092 | 0.052 ± 0.012 | 0.018 ± 0.003 | 0.013 ± 0.003 |
| Kidney              | 1.052 ± 0.012 | 0.884 ± 0.020 | 0.466 ± 0.023 | 0.343 ± 0.045 | 0.301 ± 0.023 |
| Spleen              | 0.057 ± 0.007 | 0.035 ± 0.004 | 0.028 ± 0.002 | 0.024 ± 0.005 | 0.021 ± 0.001 |
| Pancreas            | 0.016 ± 0.002 | 0.016 ± 0.001 | 0.008 ± 0.002 | 0.006 ± 0.002 | 0.005 ± 0.001 |
| Stomach             | 0.061 ± 0.014 | 0.053 ± 0.014 | 0.009 ± 0.003 | 0.005 ± 0.001 | 0.004 ± 0.001 |
| Muscle              | 0.017 ± 0.004 | 0.011 ± 0.002 | 0.006 ± 0.003 | 0.004 ± 0.002 | 0.003 ± 0.002 |
| Fat                 | 0.014 ± 0.004 | 0.012 ± 0.002 | 0.009 ± 0.001 | 0.004 ± 0.002 | 0.004 ± 0.001 |
| Bone                | 0.092 ± 0.009 | 0.069 ± 0.009 | 0.080 ± 0.008 | 0.051 ± 0.010 | 0.046 ± 0.006 |

**Table S25. Biodistribution (%ID/g)<sup>9-10</sup> of [<sup>89</sup>Zr]Zr-TRITA in selected organs at 2, 4, 24, 48, and 72 h p.i.**

| Tissue/Organ    | 2 h           | 4 h           | 24 h          | 48 h           | 72 h          |
|-----------------|---------------|---------------|---------------|----------------|---------------|
| Blood           | 1.249 ± 0.358 | 1.142 ± 0.349 | 0.042 ± 0.010 | 0.010 ± 0.003  | 0.004 ± 0.008 |
| Heart           | 0.378 ± 0.065 | 0.314 ± 0.084 | 0.058 ± 0.008 | 0.066 ± 0.012  | 0.061 ± 0.009 |
| Lung            | 0.725 ± 0.128 | 0.583 ± 0.187 | 0.144 ± 0.052 | 0.141 ± 0.043  | 0.154 ± 0.045 |
| Liver           | 0.744 ± 0.145 | 0.543 ± 0.118 | 0.316 ± 0.047 | 0.380 ± 0.045  | 0.304 ± 0.022 |
| Small intestine | 0.457 ± 0.136 | 0.345 ± 0.062 | 0.062 ± 0.013 | 0.054 ± 0.007  | 0.030 ± 0.005 |
| Large intestine | 0.553 ± 0.141 | 0.804 ± 0.176 | 0.073 ± 0.016 | 0.051 ± 0.007  | 0.034 ± 0.005 |
| Kidney          | 1.271 ± 0.218 | 1.228 ± 0.213 | 0.681 ± 0.015 | 0.744 ± 0.038  | 0.588 ± 0.036 |
| Spleen          | 0.552 ± 0.194 | 0.287 ± 0.084 | 0.100 ± 0.012 | 0.161 ± 0.030  | 0.128 ± 0.016 |
| Pancreas        | 0.364 ± 0.065 | 0.274 ± 0.037 | 0.119 ± 0.022 | 0.136 ± 0.026  | 0.103 ± 0.018 |
| Stomach         | 0.198 ± 0.038 | 0.166 ± 0.039 | 0.040 ± 0.014 | 0.042 ± 0.010  | 0.020 ± 0.004 |
| Muscle          | 0.224 ± 0.044 | 0.173 ± 0.026 | 0.063 ± 0.017 | 0.061 ± 0.035  | 0.037 ± 0.008 |
| Fat             | 0.215 ± 0.049 | 0.153 ± 0.023 | 0.069 ± 0.014 | 0.091 ± 0.014  | 0.064 ± 0.024 |
| Bone            | 2.058 ± 0.459 | 3.329 ± 0.220 | 6.043 ± 0.730 | 10.805 ± 0.803 | 8.041 ± 1.470 |

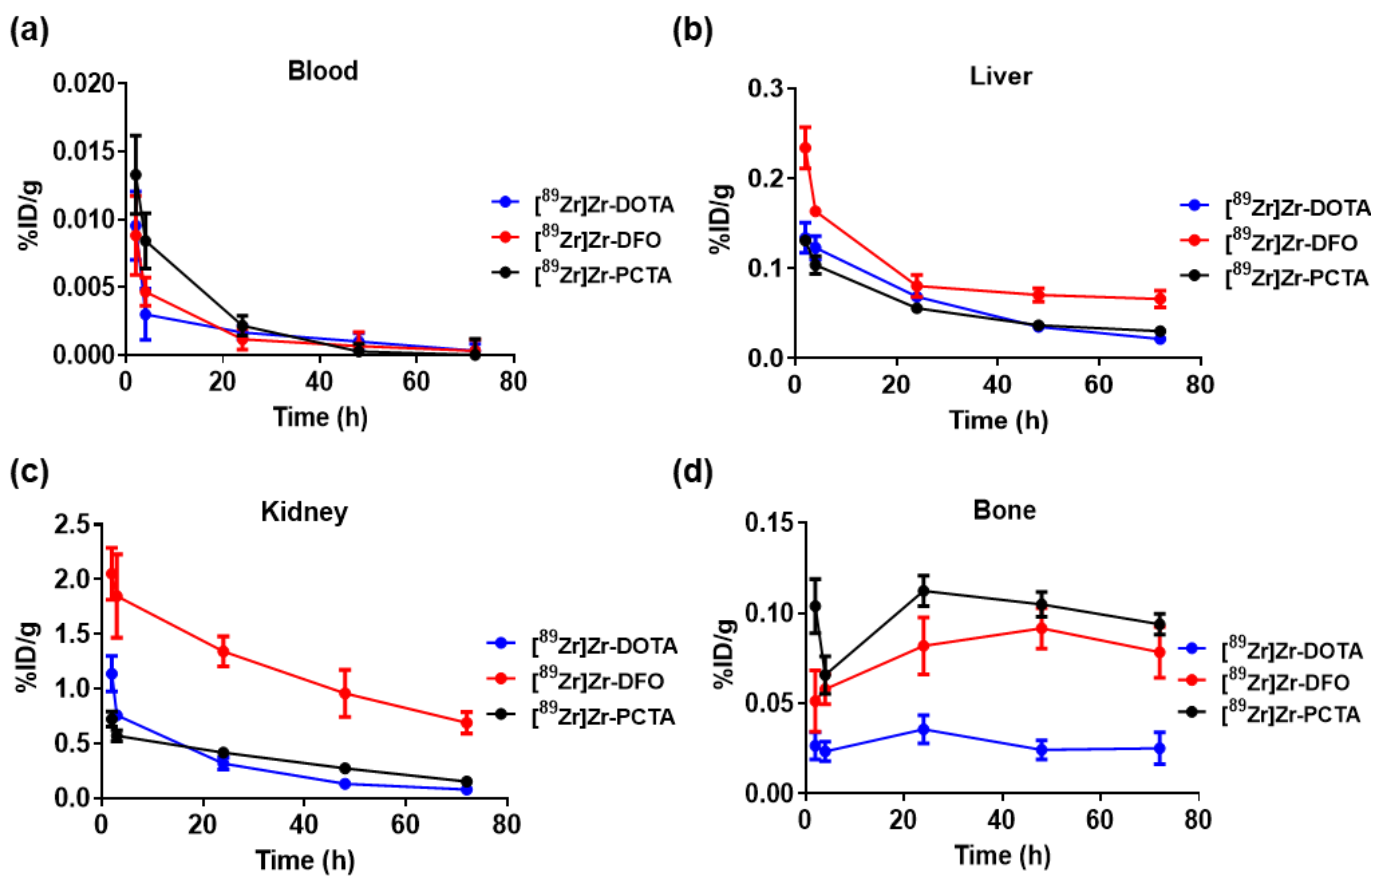

Figure S56. Biodistribution data summary of  $[^{89}\text{Zr}]\text{Zr-DOTA}$ <sup>8</sup>,  $[^{89}\text{Zr}]\text{Zr-DFO}$ <sup>9</sup>, and  $[^{89}\text{Zr}]\text{Zr-PCTA}$  in selected tissues: (a) blood, (b) liver, (c) kidney, and (d) bone.



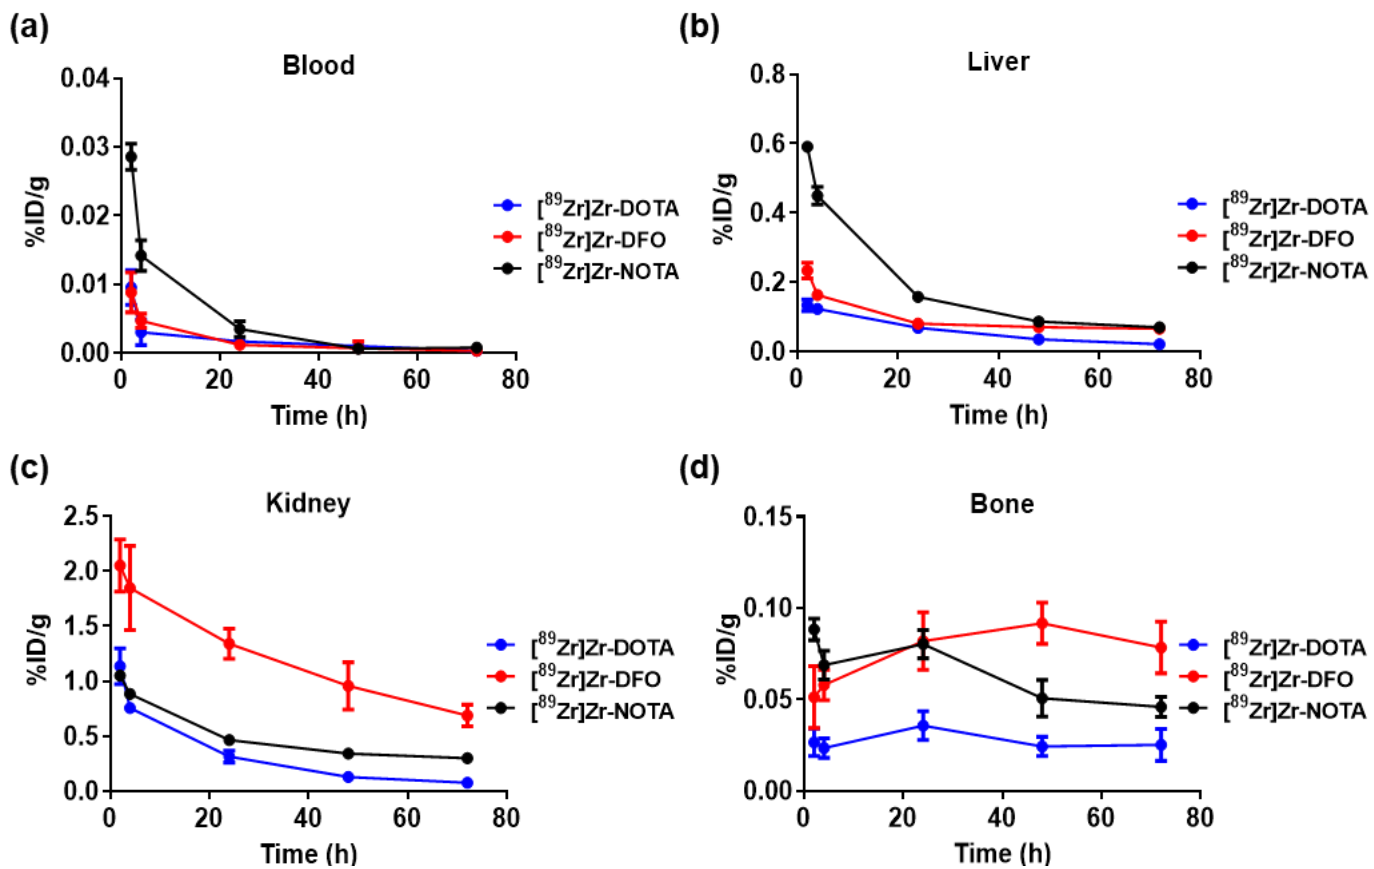

Figure S57. Biodistribution data summary of  $[^{89}\text{Zr}]\text{Zr-DOTA}$ <sup>8</sup>,  $[^{89}\text{Zr}]\text{Zr-DFO}$ <sup>9</sup>, and  $[^{89}\text{Zr}]\text{Zr-NOTA}$  in selected tissues: (a) blood, (b) liver, (c) kidney, and (d) bone.

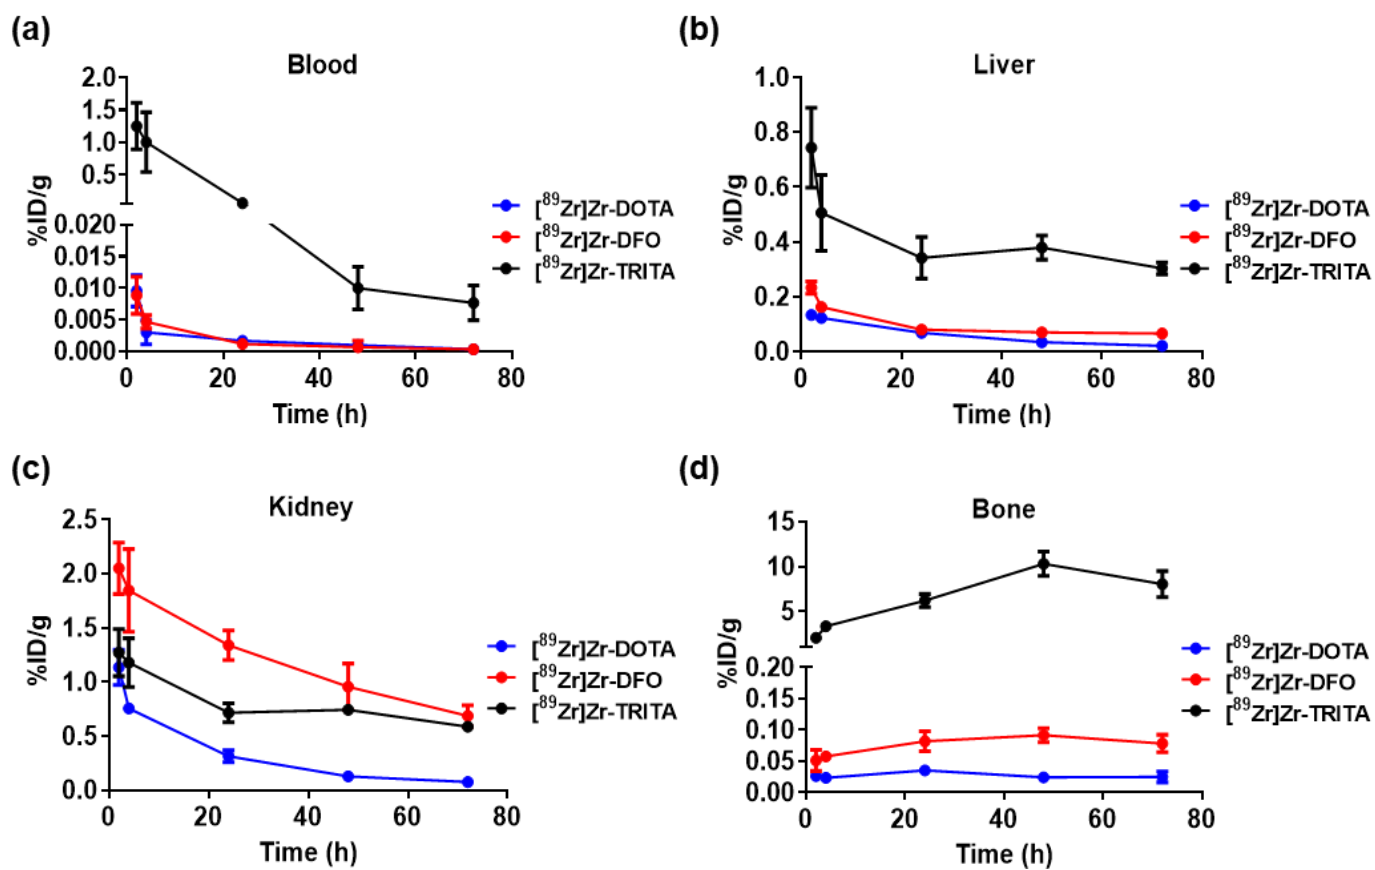

Figure S58. Biodistribution data summary of  $[^{89}\text{Zr}]\text{Zr-DOTA}$ <sup>8</sup>,  $[^{89}\text{Zr}]\text{Zr-DFO}$ <sup>9</sup>, and  $[^{89}\text{Zr}]\text{Zr-TRITA}$  in selected tissues: (a) blood, (b) liver, (c) kidney, and (d) bone.

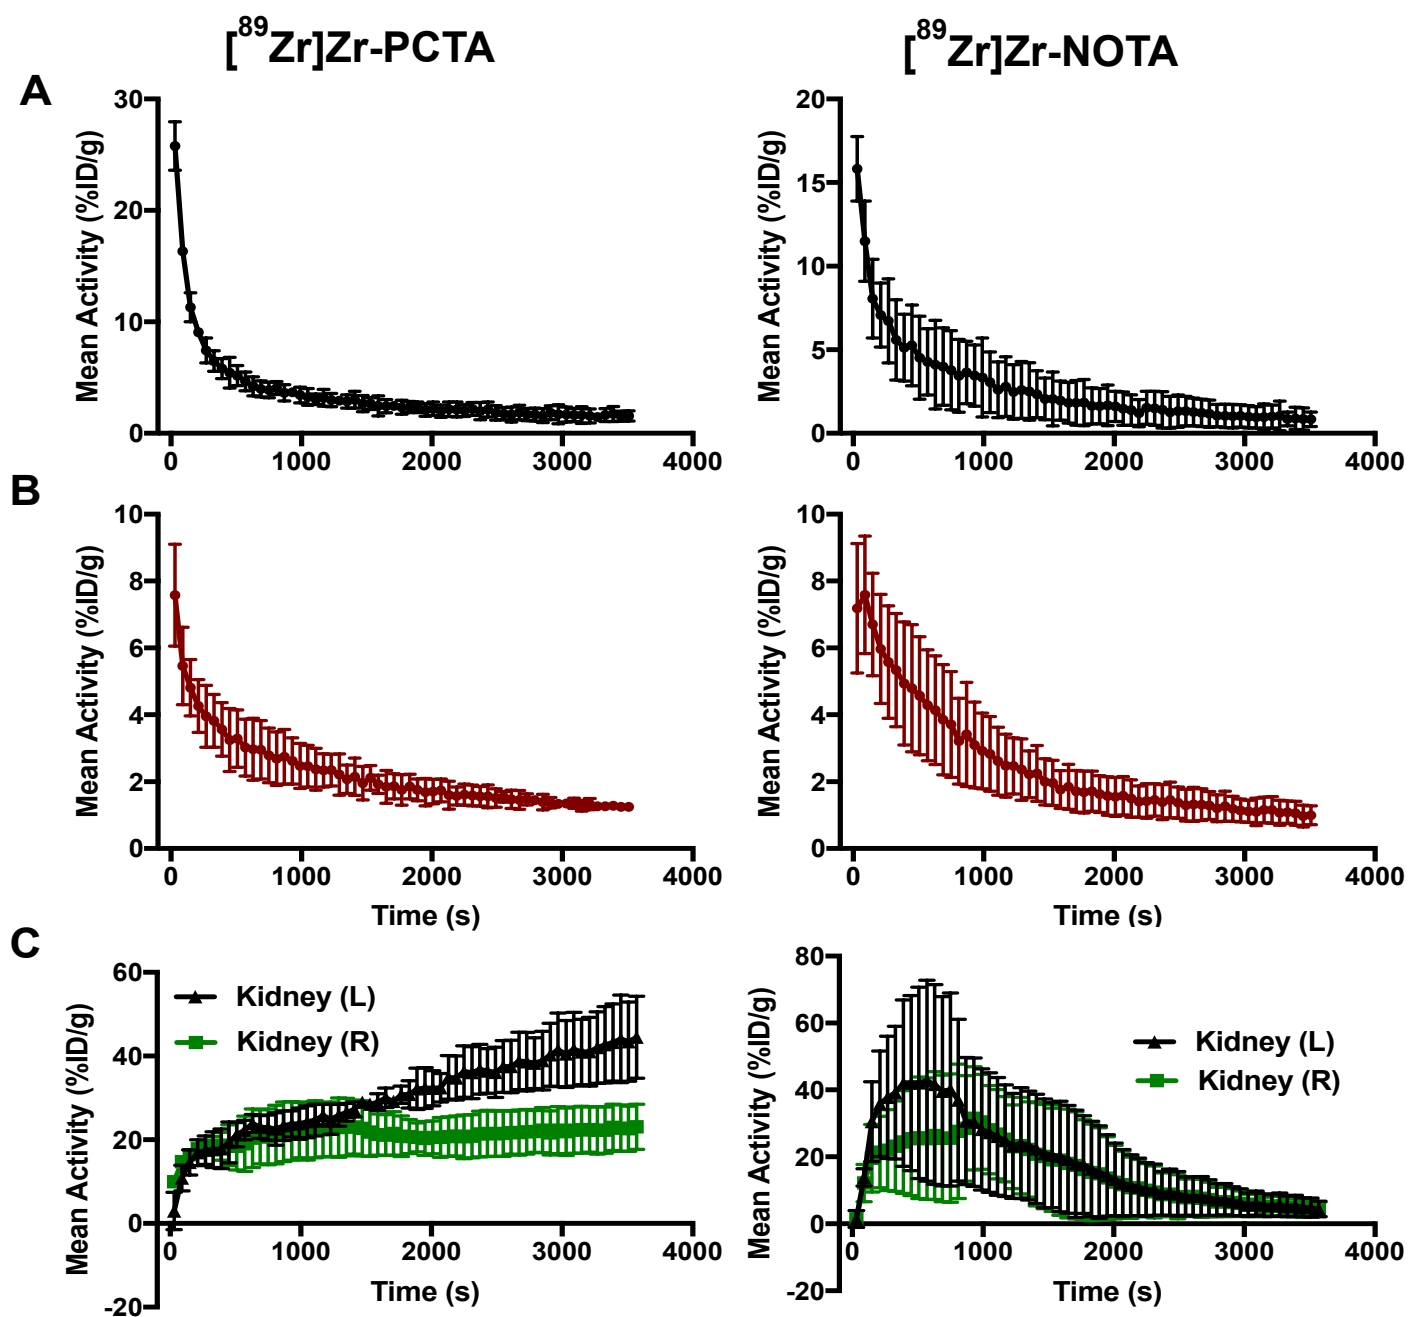

Figure S59. Dynamic PET data of  $[^{89}\text{Zr}]\text{Zr-PCTA}$  and  $[^{89}\text{Zr}]\text{Zr-NOTA}$  collected over the course of 1 h in specific tissues. Rapid perfusion and subsequent washout is represent via the blood (A) and liver (B). Slow accumulation is shown in the kidneys (C) to enable rapid clearance, which is further depicted in static PET images at later time points.

**Table S26. Comparative stability of [<sup>89</sup>Zr]Zr-Complexes in exogenous ligand challenge study**

| <b>[<sup>89</sup>Zr]Zr-Complexes</b>                       | <b>Challenging Ligand</b> | <b>pH</b> | <b>Time Point</b> | <b>% Intact of <sup>89</sup>Zr-complexes</b> |
|------------------------------------------------------------|---------------------------|-----------|-------------------|----------------------------------------------|
| [ <sup>89</sup> Zr]Zr-L4 <sup>11</sup>                     | EDTA (1000-fold)          | 7.0       | 6 d               | 87 ± 1                                       |
| [ <sup>89</sup> Zr]Zr-TAM-1 <sup>9</sup>                   | DTPA (1000-fold)          | 7.0       | 7 d               | 100                                          |
| [ <sup>89</sup> Zr]Zr-TAM-2 <sup>9</sup>                   | DTPA (1000-fold)          | 7.0       | 7 d               | 100                                          |
| [ <sup>89</sup> Zr]Zr-2,3-HOPO <sup>12</sup>               | DTPA (1000-fold)          | 7.0       | 7 d               | 78                                           |
| [ <sup>89</sup> Zr]Zr-C7 <sup>13</sup>                     | EDTA (1750-fold)          | 7.0       | 7 d               | 87 ± 3                                       |
| [ <sup>89</sup> Zr]Zr-CP256 <sup>14</sup>                  |                           |           | Data Not Reported |                                              |
|                                                            |                           | 7.0       | 7 d               | 97.2 ± 0.2                                   |
| [ <sup>89</sup> Zr]Zr-TAFC <sup>15</sup>                   | EDTA (1000-fold)          | 6.0       | 7 d               | 94.4 ± 0.5                                   |
| [ <sup>89</sup> Zr]Zr-DFO* <sup>16</sup>                   |                           |           | Data Not Reported |                                              |
| [ <sup>89</sup> Zr]Zr-DFOSq-Taur <sup>17</sup>             | EDTA (500-fold)           | 7.0       | 1 d               | 88 ± 3.2                                     |
| [ <sup>89</sup> Zr]Zr-(oxinate) <sub>4</sub> <sup>18</sup> |                           |           | Data Not Reported |                                              |
| [ <sup>89</sup> Zr]Zr-(Me-AHA) <sub>4</sub> <sup>19</sup>  |                           |           | Data Not Reported |                                              |
|                                                            |                           | 7.0       | 7 d               | 100                                          |
| [ <sup>89</sup> Zr]Zr-THPN <sup>20</sup>                   | EDTA (100-fold)           | 5.0       | 7 d               | 41.6 ± 11.1                                  |
| [ <sup>89</sup> Zr]Zr-DFO-HOPO <sup>21</sup>               | EDTA (100-fold)           | 7.0       | 7 d               | > 99                                         |
|                                                            |                           | 7.0       | 7 d               | 91.9 ± 0.1                                   |
| [ <sup>89</sup> Zr]Zr-4HMS <sup>22</sup>                   | DTPA (1000-fold)          | 5.0       | 7 d               | 80.8 ± 1.8                                   |
|                                                            |                           | 7.0       | 7 d               | 85.3 ± 2.7                                   |
| [ <sup>89</sup> Zr]Zr-(DFO2) <sup>23</sup>                 | EDTA (100-fold)           | 5.0       | 7 d               | 0.6 ± 0.2                                    |
|                                                            |                           | 7.0       | 7 d               | 100                                          |
| [ <sup>89</sup> Zr]Zr-HOPO <sup>24</sup>                   | EDTA (100-fold)           | 5.0       | 7 d               | 99.2 ± 1.5                                   |
|                                                            |                           | 7.0       | 7 d               | 20.3 ± 0.5                                   |
| [ <sup>89</sup> Zr]Zr-DFO <sup>8</sup>                     | EDTA (1000-fold)          | 5.0       | 7 d               | 0                                            |
|                                                            |                           | 7.0       | 7 d               | 100                                          |
| [ <sup>89</sup> Zr]Zr-DOTA <sup>8</sup>                    | EDTA (1000-fold)          | 5.0       | 7 d               | 100                                          |
|                                                            |                           | 7.0       | 7 d               | 100                                          |
| [ <sup>89</sup> Zr]Zr-PCTA<br>(Current Study)              | EDTA (1000-fold)          | 5.0       | 7 d               | 100                                          |
|                                                            |                           | 7.0       | 7 d               | 100                                          |
| [ <sup>89</sup> Zr]Zr-NOTA<br>(Current Study)              | EDTA (1000-fold)          | 7.0       | 7 d               | 70.7 ± 1.0                                   |
|                                                            |                           | 5.0       | 7 d               | 65.3 ± 1.2                                   |
| [ <sup>89</sup> Zr]Zr-TRITA<br>(Current Study)             | EDTA (1000-fold)          | 7.0       | 7 d               | 0                                            |
|                                                            |                           | 5.0       | 7 d               | 9.6 ± 0.1                                    |

**Table S27. Comparative stability of [<sup>89</sup>Zr]Zr-Complexes with various metals in competition study**

| [ <sup>89</sup> Zr]Zr-Complexes                            | Time Point | % Intact of [ <sup>89</sup> Zr]Zr-Complexes |                  |                  |                  |                  |                  |                  |                   |
|------------------------------------------------------------|------------|---------------------------------------------|------------------|------------------|------------------|------------------|------------------|------------------|-------------------|
|                                                            |            | Fe <sup>3+</sup>                            | Zn <sup>2+</sup> | Co <sup>2+</sup> | Cu <sup>2+</sup> | Mg <sup>2+</sup> | Gd <sup>3+</sup> | Ga <sup>3+</sup> |                   |
| [ <sup>89</sup> Zr]Zr-L4 <sup>11</sup>                     |            |                                             |                  |                  |                  |                  |                  |                  | Data Not Reported |
| [ <sup>89</sup> Zr]Zr-TAM-1 <sup>9</sup>                   |            |                                             |                  |                  |                  |                  |                  |                  | Data Not Reported |
| [ <sup>89</sup> Zr]Zr-TAM-2 <sup>9</sup>                   |            |                                             |                  |                  |                  |                  |                  |                  | Data Not Reported |
| [ <sup>89</sup> Zr]Zr-2,3-HOPO <sup>12</sup>               |            |                                             |                  |                  |                  |                  |                  |                  | Data Not Reported |
| [ <sup>89</sup> Zr]Zr-C7 <sup>13</sup>                     |            |                                             |                  |                  |                  |                  |                  |                  | Data Not Reported |
| [ <sup>89</sup> Zr]Zr-CP256 <sup>14</sup>                  | 20 min     | 14                                          |                  |                  |                  |                  |                  |                  | Data Not Reported |
| [ <sup>89</sup> Zr]Zr-TAFC <sup>15</sup>                   |            |                                             |                  |                  |                  |                  |                  |                  | Data Not Reported |
| [ <sup>89</sup> Zr]Zr-DFO* <sup>16</sup>                   |            |                                             |                  |                  |                  |                  |                  |                  | Data Not Reported |
| [ <sup>89</sup> Zr]Zr-DFOSq-Taur <sup>17</sup>             |            |                                             |                  |                  |                  |                  |                  |                  | Data Not Reported |
| [ <sup>89</sup> Zr]Zr-(oxinate) <sub>4</sub> <sup>18</sup> |            |                                             |                  |                  |                  |                  |                  |                  | Data Not Reported |
| [ <sup>89</sup> Zr]Zr-(Me-AHA) <sub>4</sub> <sup>19</sup>  |            |                                             |                  |                  |                  |                  |                  |                  | Data Not Reported |
| [ <sup>89</sup> Zr]Zr-THPN <sup>20</sup>                   |            |                                             |                  |                  |                  |                  |                  |                  | Data Not Reported |
| [ <sup>89</sup> Zr]Zr-DFO-HOPO <sup>21</sup>               |            |                                             |                  |                  |                  |                  |                  |                  | Data Not Reported |
| [ <sup>89</sup> Zr]Zr-4HMS <sup>22</sup>                   | 7 d        | 97.5 ± 1.0                                  | -                | 99.0 ± 0.7       | 99.6 ± 0.4       | 99.6 ± 0.4       | -                | -                |                   |
| [ <sup>89</sup> Zr]Zr-(DFO2) <sup>23</sup>                 | 7 d        | ~ 30                                        |                  |                  |                  |                  |                  |                  | Data Not Reported |
| [ <sup>89</sup> Zr]Zr-HOPO <sup>24</sup>                   | 7 d        | 83.0 ± 4.2                                  | 98.3 ± 2.4       | 98.9 ± 1.6       | 98.4 ± 2.3       | 98.7 ± 1.8       | 94.5 ± 4.1       | 96.4 ± 0.6       |                   |
| [ <sup>89</sup> Zr]Zr-DFO <sup>8</sup>                     | 7 d        | 33.9 ± 1.5                                  | 95.9 ± 0.7       | 95.4 ± 0.9       | 96.0 ± 1.0       | 96.8 ± 1.2       | 96.8 ± 0.2       | 72.6 ± 1.3       |                   |
| [ <sup>89</sup> Zr]Zr-DOTA <sup>8</sup>                    | 7 d        | 100                                         | 100              | 100              | 100              | 100              | 100              | 100              |                   |
| [ <sup>89</sup> Zr]Zr-PCTA (Current Study)                 | 7 d        | 100                                         | 100              | 100              | 100              | 100              | 100              | 100              |                   |
| [ <sup>89</sup> Zr]Zr-NOTA (Current Study)                 | 7 d        | 96.2 ± 0.2                                  | 90.4 ± 0.4       | 92.9 ± 0.7       | 87.8 ± 0.9       | 90.6 ± 0.4       | 96.3 ± 0.4       | 89.5 ± 1.5       |                   |
| [ <sup>89</sup> Zr]Zr-TRITA (Current Study)                | 7 d        | 70.4 ± 0.8                                  | 9.4 ± 0.7        | 7.3 ± 0.6        | 59.7 ± 0.5       | 83.9 ± 0.5       | 57.2 ± 0.6       | 61.8 ± 1.2       |                   |

**Table S28. Comparative biodistribution results of [<sup>89</sup>Zr]Zr-Complexes**

| [ <sup>89</sup> Zr]Zr-Complexes                            | Time Point | % ID/g        |                   |                |               |
|------------------------------------------------------------|------------|---------------|-------------------|----------------|---------------|
|                                                            |            | Blood         | Liver             | Kidney         | Bone          |
| [ <sup>89</sup> Zr]Zr-L4 <sup>11</sup>                     | 24 h       | 0.09 ± 0.01   | 0.40 ± 0.14       | 2.76 ± 0.40    | 0.60 ± 0.19   |
| [ <sup>89</sup> Zr]Zr-TAM-1 <sup>9</sup>                   | 24 h       | 0.003 ± 0.002 | 0.449 ± 0.037     | 8.214 ± 1.018  | 0.100 ± 0.030 |
| [ <sup>89</sup> Zr]Zr-TAM-2 <sup>9</sup>                   | 24 h       | 0.010 ± 0.003 | 1.244 ± 0.180     | 46.095 ± 7.788 | 0.274 ± 0.100 |
| [ <sup>89</sup> Zr]Zr-2,3-HOPO <sup>12</sup>               | 24 h       | 0.004 ± 0.001 | 0.650 ± 0.080     | 29.191 ± 6.989 | 0.272 ± 0.066 |
| [ <sup>89</sup> Zr]Zr-C7 <sup>13</sup>                     |            |               | Data Not Reported |                |               |
| [ <sup>89</sup> Zr]Zr-CP256 <sup>14</sup>                  |            |               | Data Not Reported |                |               |
| [ <sup>89</sup> Zr]Zr-TAFC <sup>15</sup>                   | 6 h        | 0.05 ± 0.01   | -                 | 0.86 ± 0.48    | 0.04 ± 0.02   |
| [ <sup>89</sup> Zr]Zr-DFO* <sup>16</sup>                   |            |               | Data Not Reported |                |               |
| [ <sup>89</sup> Zr]Zr-DFOSq-Taur <sup>17</sup>             |            |               | Data Not Reported |                |               |
| [ <sup>89</sup> Zr]Zr-(oxinate) <sub>4</sub> <sup>18</sup> |            |               | Data Not Reported |                |               |
| [ <sup>89</sup> Zr]Zr-(Me-AHA) <sub>4</sub> <sup>19</sup>  |            |               | Data Not Reported |                |               |
| [ <sup>89</sup> Zr]Zr-THPN <sup>20</sup>                   | 24 h       | 0.01 ± 0.01   | 1.08 ± 1.25       | 3.49 ± 0.28    | 0.11 ± 0.01   |
| [ <sup>89</sup> Zr]Zr-DFO-HOPO <sup>21</sup>               | 24 h       | 0.00 ± 0.00   | 0.02 ± 0.00       | 0.08 ± 0.01    | 0.01 ± 0.00   |
| [ <sup>89</sup> Zr]Zr-4HMS <sup>22</sup>                   | 24 h       | 0.00 ± 0.00   | 0.04 ± 0.00       | 0.80 ± 0.20    | 0.01 ± 0.00   |
| [ <sup>89</sup> Zr]Zr-(DFO) <sub>2</sub> <sup>23</sup>     |            |               | Data Not Reported |                |               |
| [ <sup>89</sup> Zr]Zr-HOPO <sup>24</sup>                   | 24 h       | 0.02 ± 0.00   | 0.06 ± 0.03       | 0.51 ± 0.29    | 0.17 ± 0.03   |
| [ <sup>89</sup> Zr]Zr-DFO <sup>8</sup>                     | 24 h       | 0.00 ± 0.00   | 0.08 ± 0.01       | 1.34 ± 0.14    | 0.08 ± 0.02   |
| [ <sup>89</sup> Zr]Zr-DOTA <sup>8</sup>                    | 24 h       | 0.00 ± 0.00   | 0.07 ± 0.00       | 0.32 ± 0.05    | 0.04 ± 0.01   |
| [ <sup>89</sup> Zr]Zr-PCTA<br>(Current Study)              | 24 h       | 0.00 ± 0.00   | 0.06 ± 0.00       | 0.42 ± 0.02    | 0.11 ± 0.01   |
| [ <sup>89</sup> Zr]Zr-NOTA<br>(Current Study)              | 24 h       | 0.00 ± 0.00   | 0.16 ± 0.01       | 0.47 ± 0.02    | 0.08 ± 0.01   |
| [ <sup>89</sup> Zr]Zr-TRITA<br>(Current Study)             | 24 h       | 0.04 ± 0.01   | 0.32 ± 0.05       | 0.68 ± 0.02    | 6.04 ± 0.73   |

## REFERENCES

1. Bruker APEX2 2014.11-0; Bruker AXS Inc.: Madison, Wisconsin, USA, 2014.
2. Bruker APEX3 2016.1-0; Bruker AXS Inc.: Madison, Wisconsin, USA., 2016.
3. Sheldrick, G. M., A short history of SHELX. *Acta Crystallogr., Sect. A: Found. Crystallogr.* **2008**, *64* (1), 112-122.
4. SAINT, 8.34A; Bruker AXS Inc.: Madison, Wisconsin, USA, 2014.
5. Sheldrick, G. M. SHELXL, 2014/7; Bruker AXS Inc.: Madison, Wisconsin, USA., 2014.
6. Sheldrick, G. M. SADABS, 2014/5; University of Göttingen, Germany, 2014.
7. Waterhouse, R. N., Determination of lipophilicity and its use as a predictor of blood-brain barrier penetration of molecular imaging agents. *Mol Imaging Biol* **2003**, *5* (6), 376-389.
8. Pandya, D. N.; Bhatt, N.; Yuan, H.; Day, C. S.; Ehrmann, B. M.; Wright, M.; Bierbach, U.; Wadas, T. J., Zirconium tetraazamacrocyclic complexes display extraordinary stability and provide a new strategy for zirconium-89-based radiopharmaceutical development. *Chem. Sci.* **2017**, *8* (3), 2309-2314.
9. Pandya, D. N.; Pailloux, S.; Tatum, D.; Magda, D.; Wadas, T. J., Di-macrocyclic terephthalamide ligands as chelators for the PET radionuclide zirconium-89. *Chem. Commun. (Cambridge, U. K.)* **2015**, *51* (12), 2301-2303.
10. Sprague, J. E.; Peng, Y.; Fiamengo, A. L.; Woodin, K. S.; Southwick, E. A.; Weisman, G. R.; Wong, E. H.; Golen, J. A.; Rheingold, A. L.; Anderson, C. J., Synthesis, characterization and in vivo studies of Cu(II)-64-labeled cross-bridged tetraazamacrocyclic-amide complexes as models of peptide conjugate imaging agents. *J Med Chem* **2007**, *50* (10), 2527-2535.
11. Boros, E.; Holland, J. P.; Kenton, N.; Rotile, N.; Caravan, P., Macrocyclic-Based Hydroxamate Ligands for Complexation and Immunoconjugation of (89)Zirconium for Positron Emission Tomography (PET) Imaging. *Chempluschem* **2016**, *81* (3), 274-281.
12. Tinianow, J. N.; Pandya, D. N.; Pailloux, S. L.; Ogasawara, A.; Vanderbilt, A. N.; Gill, H. S.; Williams, S.-P.; Wadas, T. J.; Magda, D.; Marik, J., Evaluation of a 3-hydroxypyridin-2-one (2,3-HOPO) based macrocyclic chelator for <sup>89</sup>Zr<sup>4+</sup> and its use for immunoPET imaging of HER2 positive model of ovarian carcinoma in mice. *Theranostics* **2016**, *6* (4), 511-521.
13. Guerard, F.; Lee, Y.-S.; Brechbiel, M. W., Rational Design, Synthesis, and Evaluation of Tetrahydroxamic Acid Chelators for Stable Complexation of Zirconium(IV). *Chem. - Eur. J.* **2014**, *20* (19), 5584-5591.
14. Ma, M. T.; Meszaros, L. K.; Paterson, B. M.; Berry, D. J.; Cooper, M. S.; Ma, Y.; Hider, R. C.; Blower, P. J., Tripodal tris(hydroxypyridinone) ligands for immunoconjugate PET imaging with (89)Zr(4+): comparison with desferrioxamine-B. *Dalton Trans* **2015**, *44* (11), 4884-4900.
15. Zhai, C.; Summer, D.; Rangger, C.; Franssen, G. M.; Laverman, P.; Haas, H.; Petrik, M.; Haubner, R.; Decristoforo, C., Novel Bifunctional Cyclic Chelator for (89)Zr Labeling-Radiolabeling and Targeting Properties of RGD Conjugates. *Mol Pharm* **2015**, *12* (6), 2142-2150.

16. Patra, M.; Bauman, A.; Mari, C.; Fischer, C. A.; Blacque, O.; Haussinger, D.; Gasser, G.; Mindt, T. L., An octadentate bifunctional chelating agent for the development of stable zirconium-89 based molecular imaging probes. *Chem Commun* **2014**, 50 (78), 11523-11525.
17. Rudd, S. E.; Roselt, P.; Cullinane, C.; Hicks, R. J.; Donnelly, P. S., A desferrioxamine B squaramide ester for the incorporation of zirconium-89 into antibodies. *Chem Commun (Camb)* **2016**, 52 (80), 11889-11892.
18. Ferris, T. J.; Charoenphun, P.; Meszaros, L. K.; Mullen, G. E. D.; Blower, P. J.; Went, M. J., Synthesis and characterisation of zirconium complexes for cell tracking with Zr-89 by positron emission tomography. *Dalton Trans* **2014**, 43 (39), 14851-14857.
19. Guerard, F.; Lee, Y. S.; Tripier, R.; Szajek, L. P.; Deschamps, J. R.; Brechbiel, M. W., Investigation of Zr(IV) and <sup>89</sup>Zr(IV) complexation with hydroxamates: progress towards designing a better chelator than desferrioxamine B for immuno-PET imaging. *Chem Commun (Camb)* **2013**, 49 (10), 1002-1004.
20. Buchwalder, C.; Rodriguez-Rodriguez, C.; Schaffer, P.; Karagiozov, S. K.; Saatchi, K.; Hafeli, U. O., A new tetrapodal 3-hydroxy-4-pyridinone ligand for complexation of (89)zirconium for positron emission tomography (PET) imaging. *Dalton Trans* **2017**, 46 (29), 9654-9663.
21. Allott, L.; Da Pieve, C.; Meyers, J.; Spinks, T.; Ciobota, D. M.; Kramer-Marek, G.; Smith, G., Evaluation of DFO-HOPO as an octadentate chelator for zirconium-89. *Chem Commun (Camb)* **2017**, 53 (61), 8529-8532.
22. Alnahwi, A. H.; Ait-Mohand, S.; Dumulon-Perreault, V.; Dory, Y. L.; Guerin, B., Promising Performance of 4HMS, a New Zirconium-89 Octadendate Chelator. *ACS Omega* **2020**, 5 (19), 10731-10739.
23. Sarbisheh, E. K.; Salih, A. K.; Raheem, S. J.; Lewis, J. S.; Price, E. W., A High-Denticity Chelator Based on Desferrioxamine for Enhanced Coordination of Zirconium-89. *Inorg. Chem.* **2020**, 59 (16), 11715-11727.
24. Deri, M. A.; Ponnala, S.; Zeglis, B. M.; Pohl, G.; Dannenberg, J. J.; Lewis, J. S.; Francesconi, L. C., Alternative chelator for <sup>89</sup>Zr radiopharmaceuticals: radiolabeling and evaluation of 3,4,3-(LI-1,2-HOPO). *J Med Chem* **2014**, 57 (11), 4849-4860.
